# Supplementary material for: Epigenetic Alterations Affecting Transcription Factors and Signaling Pathways in Stromal Cells of Endometriosis
Source: PLoS One. 2017 Jan 26;12(1):e0170859. doi: 10.1371/journal.pone.0170859 (PMC5268815; doi:10.1371/journal.pone.0170859)
Supplement: S4 Table — The list of the top GO terms enriched in genes identified to be DM by our stringent CpG (A) and segment (B) criteria are given. P-value cut-off <0.05 was used. C) The list of top gene sets showing enrichment of DM regulatory regions identified by our stringent segment criteria and localized in multiple genes including estrogen-responsive genes are given. FDR cut-off <0.005 was used. The list of the top GSEA gene sets and GO terms enriched in genes identified to be DE are shown in (D) and (E), respectively. The same statistical criteria were used as described for DM gene analysis. (XLSX) [file pone.0170859.s012.xlsx]

## Sheet: S4A Table
genes	GO_term	fold-enrichment	p-value (p<0.05)	FDR
TNXB, LYN, JARID2, DNER, BNC2, MAML2, MSI1, ELAVL2, MAML3, TCF3, FOXP1, EPHB2	neurogenesis	4.14239	0.000109306	0.119598
MEF2C, CDKN1B, LYN, JARID2, DNER, IL19, PDGFRA, TGFB3, TGFA, ELAVL2, ADAM12, TCF3, RALGDS, FOXP1, EPHB2	cell proliferation and differentiation	3.04459	0.00025379	3.67566
CTBP1, CBLB, CDKN1B, LYN, JARID2, RXRA, PDGFRA, TGFB3, TGFBR3, TGFA, TCF3, FOXP1	regulation of cell proliferation	2.67886	0.00431454	6.65237
MAML2, JAZF1, RUNX1T1, CREB3L2, RARA, TCF3, CBFB, ARHGAP26, FOXP1	chromatin rearrangment	6.89427	4.53277e-05	0.0557139
MEF2C, CTBP1, ZNF532, JARID2, RXRA, MAML2, RUNX1T1, MED24, TRERF1, FOXP1, BATF, BNC2, CREB3L2, JAZF1, PHF21A, ZNF710, RARA, TRAF7, MAML3, VGLL4, TCF3	transcription regulation	2.21528	0.000802561	0.982249
CBLB, MICA, LYN, PDGFRA, TCF3, CBFB, FOXP1	cell activation	4.28508	0.0054629	8.35175
CBLB, MICA, LYN, RARA, TCF3, FOXP1	positive regulation of immune system process	4.42912	0.0108484	15.9417
DHRS3, LYN, DUOX1, DIO1, PCSK5	regulation of hormone levels	5.81749	0.0102812	15.1709
DHRS3, DUOX1, DIO1, PCSK5	hormone methabolic process	6.62975	0.0217519	29.5404
TNXB, KIRREL, FREM1, TGFB3, PCSK5	cell attachment site	12.0663	0.000760257	1.06871
LYN, JARID2, TGFBR3, TCF3, CBFB, FOXP1	immune system development	3.81931	0.0194401	26.8422

## Sheet: S4B Table
genes	GO_term	fold-enrichment	p-value (p<0.05)	FDR
DDR1, TNXB, SFRP1, ICAM2, TGFA, ADAM12, ARHGAP26, FOXP1	cell communication	2.65893	0.0231011	21.3145
DDR1, TNXB, ICAM2, NID2, ADAM12, ITGBL1	cell adhesion	3.1339	0.0365171	40.9978
CDKN1B, TGFA, FOXP1	regulators of epithelial cell proliferation	15.4488	0.0152501	19.5834
PRKD1, DDR1, SRPK2, CDKN1B, EPS8, ROR1, TLK2	kinases	4.55128	0.00358568	3.98373

## Sheet: S4C Table
Gene Set Name	# Genes in Gene Set (K)	Description	# Genes in Overlap (k)	k/K	p-value	FDR q-value
GGGAGGRR_V$MAZ_Q6	2274	Genes with promoter regions [-2kb,2kb] around transcription start site containing the motif GGGAGGRR which matches annotation for MAZ: MYC-associated zinc finger protein (purine-binding transcription factor)	74	0.0325	3.43e-27	1.09e-23
CTTTGT_V$LEF1_Q2	1972	Genes with promoter regions [-2kb,2kb] around transcription start site containing the motif CTTTGT which matches annotation for LEF1: lymphoid enhancer-binding factor 1	67	0.034	1.33e-25	3.37e-22
CHICAS_RB1_TARGETS_CONFLUENT	567	Genes up-regulated in confluent IMR90 cells (fibroblast) after knockdown of RB1 [GeneID=5925] by RNAi.	37	0.0653	1.27e-23	2.3e-20
GOBERT_OLIGODENDROCYTE_DIFFERENTIATION_DN	1080	Genes down-regulated during differentiation of Oli-Neu cells (oligodendroglial precursor) in response to PD174265 [PubChemID=4709].	48	0.0444	3.55e-23	5.64e-20
TTGTTT_V$FOXO4_01	2061	Genes with promoter regions [-2kb,2kb] around transcription start site containing the motif TTGTTT which matches annotation for MLLT7: myeloid/lymphoid or mixed-lineage leukemia (trithorax homolog, Drosophila); translocated to, 7	65	0.0315	4.32e-23	6.11e-20
RODRIGUES_THYROID_CARCINOMA_POORLY_DIFFERENTIATED_DN	805	Genes down-regulated in poorly differentiated thyroid carcinoma (PDTC) compared to normal thyroid tissue.	42	0.0522	5.83e-23	7.41e-20
GRAESSMANN_APOPTOSIS_BY_DOXORUBICIN_DN	1781	Genes down-regulated in ME-A cells (breast cancer) undergoing apoptosis in response to doxorubicin [PubChem=31703].	58	0.0326	2.9e-21	3.35e-18
KOINUMA_TARGETS_OF_SMAD2_OR_SMAD3	824	Genes with promoters occupied by SMAD2 or SMAD3 [GeneID=4087, 4088] in HaCaT cells (keratinocyte) according to a ChIP-chip analysis.	40	0.0485	8.8e-21	9.33e-18
MEISSNER_BRAIN_HCP_WITH_H3K4ME3_AND_H3K27ME3	1069	Genes with high-CpG-density promoters (HCP) bearing histone H3 dimethylation at K4 (H3K4me2) and trimethylation at K27 (H3K27me3) in brain.	43	0.0402	3.28e-19	3.21e-16
BLALOCK_ALZHEIMERS_DISEASE_UP	1691	Genes up-regulated in brain from patients with Alzheimer's disease.	53	0.0313	9.75e-19	7.75e-16
GGGCGGR_V$SP1_Q6	2940	Genes with promoter regions [-2kb,2kb] around transcription start site containing the motif GGGCGGR which matches annotation for SP1: Sp1 transcription factor	70	0.0238	3.66e-18	2.72e-15
GGGTGGRR_V$PAX4_03	1294	Genes with promoter regions [-2kb,2kb] around transcription start site containing the motif GGGTGGRR which matches annotation for PAX4: paired box gene 4	44	0.034	6.19e-17	3.75e-14
CTTTGA_V$LEF1_Q2	1232	Genes with promoter regions [-2kb,2kb] around transcription start site containing the motif CTTTGA which matches annotation for LEF1: lymphoid enhancer-binding factor 1	42	0.0341	3.06e-16	1.77e-13
BIOPOLYMER_METABOLIC_PROCESS	1684	Genes annotated by the GO term GO:0043283. The chemical reactions and pathways involving biopolymers, long, repeating chains of monomers found in nature e.g. polysaccharides and proteins.	49	0.0291	4.27e-16	2.26e-13
LIU_PROSTATE_CANCER_DN	481	Genes down-regulated in prostate cancer samples.	27	0.0561	6.72e-16	3.42e-13
GSE16266_CTRL_VS_LPS_STIM_MEF_UP	200	Genes up-regulated in mouse embryonic fibroblasts (MEF): control versus LPS.	19	0.095	1.17e-15	5.7e-13
DNA_BINDING	602	Genes annotated by the GO term GO:0003677. Interacting selectively with DNA (deoxyribonucleic acid).	29	0.0482	2.92e-15	1.37e-12
RTAAACA_V$FREAC2_01	919	Genes with promoter regions [-2kb,2kb] around transcription start site containing the motif RTAAACA which matches annotation for FOXF2: forkhead box F2	35	0.0381	4.25e-15	1.93e-12
TATAAA_V$TATA_01	1296	Genes with promoter regions [-2kb,2kb] around transcription start site containing the motif TATAAA which matches annotation for TAF<br> TATA	41	0.0316	8.7e-15	3.81e-12
TRANSCRIPTION_DNA_DEPENDENT	636	Genes annotated by the GO term GO:0006351. The synthesis of RNA on a template of DNA.	29	0.0456	1.19e-14	5.04e-12
RNA_BIOSYNTHETIC_PROCESS	638	Genes annotated by the GO term GO:0032774. The chemical reactions and pathways resulting in the formation of RNA, ribonucleic acid, one of the two main type of nucleic acid, consisting of a long, unbranched macromolecule formed from ribonucleotides joined in 3',5'-phosphodiester linkage. Includes polymerization of ribonucleotide monomers.	29	0.0455	1.29e-14	5.28e-12
GSE16450_CTRL_VS_IFNA_12H_STIM_IMMATURE_NEURON_CELL_LINE_UP	200	Genes up-regulated in immature neuron cell line: control versus interferon alpha (12h).	18	0.09	1.71e-14	6.6e-12
REGULATION_OF_TRANSCRIPTIONDNA_DEPENDENT	461	Genes annotated by the GO term GO:0006355. Any process that modulates the frequency, rate or extent of DNA-dependent transcription.	25	0.0542	1.8e-14	6.73e-12
TRANSCRIPTION	753	Genes annotated by the GO term GO:0006350. The synthesis of either RNA on a template of DNA or DNA on a template of RNA.	31	0.0412	2.17e-14	7.8e-12
REGULATION_OF_GENE_EXPRESSION	673	Genes annotated by the GO term GO:0010468. Any process that modulates the frequency, rate or extent of gene expression. Gene expression is the process in which a gene's coding sequence is converted into a mature gene product or products (proteins or RNA). This includes the production of an RNA transcript as well as any processing to produce a mature RNA product or an mRNA (for protein-coding gene…	29	0.0431	4.96e-14	1.62e-11
BHAT_ESR1_TARGETS_VIA_AKT1_UP	281	Genes bound by ESR1 [GeneID=2099] and up-regulated by estradiol [PubChemID=5757] in MCF-7 cells (breast cancer) expressing constitutevly active form of AKT1 [GeneID=207].	20	0.0712	5.21e-14	1.66e-11
REGULATION_OF_CELLULAR_METABOLIC_PROCESS	787	Genes annotated by the GO term GO:0031323. Any process that modulates the frequency, rate or extent of the chemical reactions and pathways by which individual cells transform chemical substances.	31	0.0394	7.01e-14	2.17e-11
REGULATION_OF_METABOLIC_PROCESS	799	Genes annotated by the GO term GO:0019222. Any process that modulates the frequency, rate or extent of the chemical reactions and pathways within a cell or an organism.	31	0.0388	1.04e-13	3.09e-11
GSE2405_0H_VS_6H_A_PHAGOCYTOPHILUM_STIM_NEUTROPHIL_UP	195	Genes up-regulated in polymorphonuclear leukocytes (6h): control versus infection by A. phagocytophilum.	17	0.0872	1.56e-13	4.23e-11
GOZGIT_ESR1_TARGETS_DN	781	Genes down-regulated in TMX2-28 cells (breast cancer) which do not express ESR1 [GeneID=2099]) compared to the parental MCF7 cells which do.	30	0.0384	3.42e-13	8.7e-11

## Sheet: S4D Table
Gene Set Name	# Genes in Gene Set (K)	Description	# Genes in Overlap (k)	k/K	p-value	FDR q-value
BLALOCK_ALZHEIMERS_DISEASE_UP	1691	Genes up-regulated in brain from patients with Alzheimer's disease.	224	0.1325	2.98e-83	3.55e-79
GRAESSMANN_APOPTOSIS_BY_DOXORUBICIN_DN	1781	Genes down-regulated in ME-A cells (breast cancer) undergoing apoptosis in response to doxorubicin [PubChem=31703].	226	0.1269	2.42e-80	1.44e-76
DACOSTA_UV_RESPONSE_VIA_ERCC3_DN	855	Genes down-regulated in fibroblasts expressing mutant forms of ERCC3 [GeneID=2071] after UV irradiation.	135	0.1579	9.79e-59	3.89e-55
PILON_KLF1_TARGETS_DN	1972	Genes down-regulated in erythroid progenitor cells from fetal livers of E13.5 embryos with KLF1 [GeneID=10661] knockout compared to those from the wild type embryos.	203	0.1029	1.99e-56	5.94e-53
BIOPOLYMER_METABOLIC_PROCESS	1684	Genes annotated by the GO term GO:0043283. The chemical reactions and pathways involving biopolymers, long, repeating chains of monomers found in nature e.g. polysaccharides and proteins.	185	0.1099	1.73e-55	4.12e-52
CHARAFE_BREAST_CANCER_LUMINAL_VS_MESENCHYMAL_DN	460	Genes down-regulated in luminal-like breast cancer cell lines compared to the mesenchymal-like ones.	96	0.2087	6.6e-53	1.31e-49
GOBERT_OLIGODENDROCYTE_DIFFERENTIATION_DN	1080	Genes down-regulated during differentiation of Oli-Neu cells (oligodendroglial precursor) in response to PD174265 [PubChemID=4709].	140	0.1296	3.06e-50	5.21e-47
KOINUMA_TARGETS_OF_SMAD2_OR_SMAD3	824	Genes with promoters occupied by SMAD2 or SMAD3 [GeneID=4087, 4088] in HaCaT cells (keratinocyte) according to a ChIP-chip analysis.	116	0.1408	2.92e-45	4.36e-42
NUCLEOBASENUCLEOSIDENUCLEOTIDE_AND_NUCLEIC_ACID_METABOLIC_PROCESS	1244	Genes annotated by the GO term GO:0006139. The chemical reactions and pathways involving nucleobases, nucleosides, nucleotides and nucleic acids.	140	0.1125	5.33e-43	7.05e-40
BUYTAERT_PHOTODYNAMIC_THERAPY_STRESS_UP	811	Genes up-regulated in T24 (bladder cancer) cells in response to the photodynamic therapy (PDT) stress.	111	0.1369	3.94e-42	4.69e-39
CHARAFE_BREAST_CANCER_LUMINAL_VS_BASAL_DN	455	Genes down-regulated in luminal-like breast cancer cell lines compared to the basal-like ones.	82	0.1802	3.03e-40	3.28e-37
NUYTTEN_NIPP1_TARGETS_DN	848	Genes down-regulated in PC3 cells (prostate cancer) after knockdown of NIPP1 [GeneID=5511] by RNAi.	110	0.1297	1.56e-39	1.55e-36
NUYTTEN_EZH2_TARGETS_UP	1037	Genes up-regulated in PC3 cells (prostate cancer) after knockdown of EZH2 [GeneID=2146] by RNAi.	121	0.1167	9.6e-39	8.8e-36
CHEN_METABOLIC_SYNDROM_NETWORK	1210	Genes forming the macrophage-enriched metabolic network (MEMN) claimed to have a causal relationship with the metabolic syndrom traits.	131	0.1083	1.93e-38	1.64e-35
DACOSTA_UV_RESPONSE_VIA_ERCC3_COMMON_DN	483	Common down-regulated transcripts in fibroblasts expressing either XP/CS or TDD mutant forms of ERCC3 [GeneID=2071], after UVC irradiation.	81	0.1677	2.17e-37	1.72e-34
WONG_ADULT_TISSUE_STEM_MODULE	721	The 'adult tissue stem' module: genes coordinately up-regulated in a compendium of adult tissue stem cells.	98	0.1359	5.23e-37	3.89e-34
ONKEN_UVEAL_MELANOMA_UP	783	Genes up-regulated in uveal melanoma: class 2 vs class 1 tumors.	102	0.1303	7.34e-37	5.15e-34
FORTSCHEGGER_PHF8_TARGETS_DN	784	Genes down-regulated in HeLa cells (cervical carcinoma) upon knockdown of PHF8 [GeneID=23133] by RNAi.	102	0.1301	8.21e-37	5.44e-34
DIAZ_CHRONIC_MEYLOGENOUS_LEUKEMIA_UP	1382	Genes up-regulated in CD34+ [GeneID=947] cells isolated from bone marrow of CML (chronic myelogenous leukemia) patients, compared to those from normal donors.	137	0.0991	4.91e-36	3.08e-33
SIGNAL_TRANSDUCTION	1634	Genes annotated by the GO term GO:0007165. The cascade of processes by which a signal interacts with a receptor, causing a change in the level or activity of a second messenger or other downstream target, and ultimately effecting a change in the functioning of the cell.	150	0.0918	1.29e-35	7.66e-33
BERENJENO_TRANSFORMED_BY_RHOA_DN	394	Genes down-regulated in NIH3T3 cells (fibroblasts) transformed by expression of contitutively active (Q63L) form of RHOA [GeneID=387] off plasmid vector.	71	0.1802	5.56e-35	3.15e-32
KRIEG_HYPOXIA_NOT_VIA_KDM3A	770	Genes induced under hypoxia independently of KDM3A [GeneID=55818] in RCC4 cells (renal carcinoma) expressing VHL [GeneID=7428].	98	0.1273	1.35e-34	7.33e-32
MILI_PSEUDOPODIA_HAPTOTAXIS_DN	668	Transcripts depleted from pseudopodia of NIH/3T3 cells (fibroblast) in response to haptotactic migratory stimulus by fibronectin, FN1 [GeneID=2335].	91	0.1362	1.69e-34	8.76e-32
JOHNSTONE_PARVB_TARGETS_3_DN	918	Genes down-regulated upon overexpression of PARVB [GeneID=29780] in MDA-MB-231 cells (breast cancer) cultured in 3D Matrigel only.	107	0.1166	2.83e-34	1.4e-31
BRUINS_UVC_RESPONSE_LATE	1137	Late response genes: differentially expressed only 12 h after UV-C irradiation of MEF cells (embryonic fibroblast).	119	0.1047	1.52e-33	7.23e-31
LIU_PROSTATE_CANCER_DN	481	Genes down-regulated in prostate cancer samples.	76	0.158	2.46e-33	1.13e-30
CUI_TCF21_TARGETS_2_DN	830	All significantly down-regulated genes in kidney glomeruli isolated from TCF21 [Gene ID=6943] knockout mice.	100	0.1205	2.83e-33	1.25e-30
CHICAS_RB1_TARGETS_CONFLUENT	567	Genes up-regulated in confluent IMR90 cells (fibroblast) after knockdown of RB1 [GeneID=5925] by RNAi.	82	0.1446	4.73e-33	2.01e-30
RNA_METABOLIC_PROCESS	841	Genes annotated by the GO term GO:0016070. The chemical reactions and pathways involving RNA, ribonucleic acid, one of the two main type of nucleic acid, consisting of a long, unbranched macromolecule formed from ribonucleotides joined in 3',5'-phosphodiester linkage.	100	0.1189	8.5e-33	3.49e-30
LASTOWSKA_NEUROBLASTOMA_COPY_NUMBER_DN	800	Genes with copy number losses in primary neuroblastoma tumors.	97	0.1212	1.6e-32	6.34e-30
BENPORATH_NANOG_TARGETS	988	Set 'Nanog targets': genes upregulated and identified by ChIP on chip as Nanog [GeneID=79923] transcription factor targets in human embryonic stem cells.	108	0.1093	3.96e-32	1.52e-29
KINSEY_TARGETS_OF_EWSR1_FLII_FUSION_UP	1278	Genes up-regulated in TC71 and EWS502 cells (Ewing's sarcoma) by EWSR1-FLI1 [GeneID=2130;2314] as inferred from RNAi knockdown of this fusion protein.	124	0.097	9.59e-32	3.57e-29
HAN_SATB1_TARGETS_UP	395	Genes up-regulated in MDA-MB-231 cells (breast cancer) after knockdown of SATB1 [GeneID=6304] by RNAi.	67	0.1696	2.01e-31	7.27e-29
REN_ALVEOLAR_RHABDOMYOSARCOMA_DN	408	Genes commonly down-regulated in human alveolar rhabdomyosarcoma (ARMS) and its mouse model overexpressing PAX3-FOXO1 [GeneID=5077;2308] fusion.	68	0.1667	2.16e-31	7.55e-29
PHONG_TNF_RESPONSE_NOT_VIA_P38	337	Genes whose expression changes in Calu-6 cells (lung cancer) by TNF [GeneID=7124] were not affected by p38 inhibitor LY479754.	62	0.184	3.17e-31	1.08e-28
POSITIVE_REGULATION_OF_CELLULAR_PROCESS	668	Genes annotated by the GO term GO:0048522. Any process that activates or increases the frequency, rate or extent of cellular processes, those that are carried out at the cellular level, but are not necessarily restricted to a single cell. For example, cell communication occurs among more than one cell, but occurs at the cellular level.	86	0.1287	7.86e-31	2.6e-28
SENESE_HDAC3_TARGETS_UP	501	Genes up-regulated in U2OS cells (osteosarcoma) upon knockdown of HDAC3 [GeneID=8841] by RNAi.	74	0.1477	1.56e-30	5.02e-28
MODULE_1	368	Ovary genes.	63	0.1712	7.45e-30	2.34e-27
SENESE_HDAC3_TARGETS_DN	536	Genes down-regulated in U2OS cells (osteosarcoma) upon knockdown of HDAC3 [GeneID=8841] by RNAi.	75	0.1399	2.27e-29	6.93e-27
DOUGLAS_BMI1_TARGETS_UP	566	Genes up-regulated in A4573 cells (Ewing's sarcoma, ESFT) after knockdown of BMI1 [GeneID=648] by RNAi.	77	0.136	2.65e-29	7.9e-27
JOHNSTONE_PARVB_TARGETS_3_UP	430	Genes up-regulated upon overexpression of PARVB [GeneID=29780] in MDA-MB-231 cells (breast cancer) cultured in 3D Matrigel only.	67	0.1558	3.74e-29	1.09e-26
GRAESSMANN_RESPONSE_TO_MC_AND_DOXORUBICIN_DN	770	Genes down-regulated in ME-A cells (breast cancer, sensitive to apoptotic stimuli) exposed to doxorubicin [PubChem=31703] in the presence of medium concentrate (MC) from ME-C cells (breast cancer, resistant to apoptotic stimuli).	90	0.1169	4.79e-29	1.36e-26
POSITIVE_REGULATION_OF_BIOLOGICAL_PROCESS	709	Genes annotated by the GO term GO:0048518. Any process that activates or increases the frequency, rate or extent of a biological process. Biological processes are regulated by many means; examples include the control of gene expression, protein modification or interaction with a protein or substrate molecule.	86	0.1213	5.99e-29	1.66e-26
GOZGIT_ESR1_TARGETS_DN	781	Genes down-regulated in TMX2-28 cells (breast cancer) which do not express ESR1 [GeneID=2099]) compared to the parental MCF7 cells which do.	90	0.1152	1.37e-28	3.71e-26
GRAESSMANN_APOPTOSIS_BY_DOXORUBICIN_UP	1142	Genes up-regulated in ME-A cells (breast cancer) undergoing apoptosis in response to doxorubicin [PubChem=31703].	111	0.0972	1.54e-28	4.08e-26
JOHNSTONE_PARVB_TARGETS_2_DN	336	Genes down-regulated upon overexpression of PARVB [GeneID=29780] in MDA-MB-231 cells (breast cancer) cultured in 3D collagen I and 3D Matrigel only.	58	0.1726	8.86e-28	2.29e-25
BONOME_OVARIAN_CANCER_SURVIVAL_SUBOPTIMAL_DEBULKING	510	Genes whose expression in suboptimally debulked ovarian tumors is associated with survival prognosis.	71	0.1392	9.97e-28	2.53e-25
DAVICIONI_TARGETS_OF_PAX_FOXO1_FUSIONS_UP	255	Genes up-regulated in RD cells (embryonal rhabdomyosarcoma, ERMS) by expression of PAX3- or PAX7-FOXO1 [GeneID=5077;5081;2308] fusions off retroviral vectors.	51	0.2	1.08e-27	2.67e-25
CHICAS_RB1_TARGETS_SENESCENT	572	Genes up-regulated in senescent IMR90 cells (fibroblast) after knockdown of RB1 [GeneID=5925] by RNAi.	75	0.1311	1.56e-27	3.8e-25
PEREZ_TP53_TARGETS	1174	Genes up-regulated in the HMEC cells (primary mammary epithelium) upon expression of TP53 [GeneID=7157] off adenoviral vector.	111	0.0945	1.6e-27	3.82e-25
SCHLOSSER_SERUM_RESPONSE_DN	712	Cluster 4: genes down-regulated in B493-6 cells (B lymphocytes) upon serum stimulation but not affected by MYC [GeneID=4609].	84	0.118	1.86e-27	4.35e-25
CELL_DEVELOPMENT	577	Genes annotated by the GO term GO:0048468. The process whose specific outcome is the progression of the cell over time, from its formation to the mature structure. Cell development does not include the steps involved in committing a cell to a specific fate.	75	0.13	2.74e-27	6.27e-25
MIYAGAWA_TARGETS_OF_EWSR1_ETS_FUSIONS_DN	229	Genes commonly down-regulated in UET-13 cells (mesenchymal progenitor) by expression of EWSR1 [GeneID=2130] fusions with ETS transcription factors FLI1 and ERG [GeneID=2313 ,2078].	48	0.2096	4.2e-27	9.45e-25
LOPEZ_MBD_TARGETS	957	Genes up-regulated in HeLa cells (cervical cancer) after simultaneus knockdown of all three MBD (methyl-CpG binding domain) proteins MeCP2, MBD1 and MBD2 [GeneID=4204;4152;8932] by RNAi.	98	0.1024	5.18e-27	1.14e-24
FLECHNER_BIOPSY_KIDNEY_TRANSPLANT_OK_VS_DONOR_UP	555	Genes up-regulated in kidney biopsies from patients with well functioning kidneys more than 1-year post transplant compared to the biopsies from normal living kidney donors.	73	0.1315	6.49e-27	1.41e-24
ENK_UV_RESPONSE_KERATINOCYTE_DN	485	Genes down-regulated in NHEK cells (normal epidermal keratinocytes) after UVB irradiation.	68	0.1402	8.65e-27	1.84e-24
ZWANG_CLASS_1_TRANSIENTLY_INDUCED_BY_EGF	516	Class I of genes transiently induced by EGF [GeneID =1950] in 184A1 cells (mammary epithelium).	70	0.1357	1.15e-26	2.39e-24
LIM_MAMMARY_STEM_CELL_UP	489	Genes consistently up-regulated in mammary stem cells both in mouse and human species.	68	0.1391	1.41e-26	2.9e-24
PUJANA_BRCA1_PCC_NETWORK	1652	Genes constituting the BRCA1-PCC network of transcripts whose expression positively correlated (Pearson correlation coefficient, PCC >= 0.4) with that of BRCA1 [GeneID=672] across a compendium of normal tissues.	134	0.0811	1.43e-26	2.9e-24
KRIGE_RESPONSE_TO_TOSEDOSTAT_6HR_UP	953	Genes up-regulated in HL-60 cells (acute promyelocytic leukemia, APL) after treatment with the aminopeptidase inhibitor tosedostat (CHR-2797) [PubChem=15547703] for 6 h.	97	0.1018	1.52e-26	2.97e-24
KRIGE_RESPONSE_TO_TOSEDOSTAT_24HR_UP	783	Genes up-regulated in HL-60 cells (acute promyelocytic leukemia, APL) after treatment with the aminopeptidase inhibitor tosedostat (CHR-2797) [PubChem=15547703] for 24 h.	87	0.1111	1.52e-26	2.97e-24
DUTERTRE_ESTRADIOL_RESPONSE_24HR_DN	505	Genes down-regulated in MCF7 cells (breast cancer) at 24 h of estradiol [PubChemID=5757] treatment.	69	0.1366	1.72e-26	3.29e-24
YAGI_AML_WITH_T_8_21_TRANSLOCATION	368	Genes specifically expressed in samples from patients with pediatric AML (acute myeloid leukemia ) bearing t(8;21) translocation.	59	0.1603	1.74e-26	3.29e-24
FULCHER_INFLAMMATORY_RESPONSE_LECTIN_VS_LPS_UP	579	Genes up-regulated in monocyte-derived dendritic cells (MDDC) after stimulation with galecin-1 (lectin, LGALS1) [GeneID=3956] compared to that with bacterial lipopolysaccharide (LPS).	74	0.1278	1.77e-26	3.3e-24
DAZARD_RESPONSE_TO_UV_NHEK_DN	318	Genes down-regulated in NHEK cells (normal keratinocytes) by UV-B irradiation.	55	0.173	1.88e-26	3.44e-24
MARSON_BOUND_BY_FOXP3_UNSTIMULATED	1229	Genes with promoters bound by FOXP3 [GeneID=50943] in unstimulated hybridoma cells.	112	0.0911	2.05e-26	3.7e-24
PUJANA_ATM_PCC_NETWORK	1442	Genes constituting the ATM-PCC network of transcripts whose expression positively correlated (Pearson correlation coefficient, PCC >= 0.4) with that of ATM [GeneID=472] across a compendium of normal tissues.	123	0.0853	2.38e-26	4.24e-24
PATIL_LIVER_CANCER	747	Genes up-regulated in hepatocellular carcinoma (HCC) compared to normal liver samples.	84	0.1124	5.09e-26	8.84e-24
SENESE_HDAC1_TARGETS_UP	457	Genes up-regulated in U2OS cells (osteosarcoma) upon knockdown of HDAC1 [GeneID=3065] by RNAi.	65	0.1422	5.12e-26	8.84e-24
BUYTAERT_PHOTODYNAMIC_THERAPY_STRESS_DN	637	Genes down-regulated in T24 (bladder cancer) cells in response to the photodynamic therapy (PDT) stress.	77	0.1209	6.2e-26	1.06e-23
WAKABAYASHI_ADIPOGENESIS_PPARG_BOUND_8D	658	Genes with promoters bound by PPARG [GeneID=5468] at 8 day time point of adipocyte differentiation of 3T3-L1 cells (preadipocyte).	78	0.1185	1.05e-25	1.76e-23
MODULE_2	384	DRG (dorsal root ganglia) genes.	59	0.1536	1.7e-25	2.81e-23
CREIGHTON_ENDOCRINE_THERAPY_RESISTANCE_5	482	The 'group 5 set' of genes associated with acquired endocrine therapy resistance in breast tumors expressing ESR1 but not ERBB2 [GeneID=2099;2064].	66	0.1369	1.91e-25	3.12e-23
MARSON_BOUND_BY_FOXP3_STIMULATED	1022	Genes with promoters bound by FOXP3 [GeneID=50943] in hybridoma cells stimulated by PMA [PubChem=4792] and ionomycin [PubChem=3733].	99	0.0969	2e-25	3.21e-23
NUYTTEN_EZH2_TARGETS_DN	1024	Genes down-regulated in PC3 cells (prostate cancer) after knockdown of EZH2 [GeneID=2146] by RNAi.	99	0.0967	2.31e-25	3.68e-23
SCHAEFFER_PROSTATE_DEVELOPMENT_6HR_DN	514	Genes down-regulated in the urogenital sinus (UGS) of day E16 females exposed to the androgen dihydrotestosterone [PubChem=10635] for 6 h.	68	0.1323	2.68e-25	4.2e-23
BROWNE_HCMV_INFECTION_14HR_DN	298	Genes down-regulated in primary fibroblast cell culture after infection with HCMV (AD169 strain) at 14 h time point that were not down-regulated at the previous time point, 12 h.	52	0.1745	2.86e-25	4.43e-23
DODD_NASOPHARYNGEAL_CARCINOMA_DN	1375	Genes down-regulated in nasopharyngeal carcinoma (NPC) compared to the normal tissue.	117	0.0851	5.27e-25	8.06e-23
KINASE_ACTIVITY	369	Genes annotated by the GO term GO:0016301. Catalysis of the transfer of a phosphate group, usually from ATP, to a substrate molecule.	57	0.1545	8.53e-25	1.29e-22
TRANSFERASE_ACTIVITY_TRANSFERRING_PHOSPHORUS_CONTAINING_GROUPS	424	Genes annotated by the GO term GO:0016772. Catalysis of the transfer of a phosphorus-containing group from one compound (donor) to another (acceptor).	61	0.1439	9.23e-25	1.38e-22
PROTEIN_METABOLIC_PROCESS	1231	Genes annotated by the GO term GO:0019538. The chemical reactions and pathways involving a specific protein, rather than of proteins in general. Includes protein modification.	109	0.0885	1.02e-24	1.5e-22
TRANSCRIPTION_DNA_DEPENDENT	636	Genes annotated by the GO term GO:0006351. The synthesis of RNA on a template of DNA.	75	0.1179	1.28e-24	1.86e-22
RNA_BIOSYNTHETIC_PROCESS	638	Genes annotated by the GO term GO:0032774. The chemical reactions and pathways resulting in the formation of RNA, ribonucleic acid, one of the two main type of nucleic acid, consisting of a long, unbranched macromolecule formed from ribonucleotides joined in 3',5'-phosphodiester linkage. Includes polymerization of ribonucleotide monomers.	75	0.1176	1.55e-24	2.23e-22
APOPTOSIS_GO	431	Genes annotated by the GO term GO:0006915. A form of programmed cell death induced by external or internal signals that trigger the activity of proteolytic caspases, whose actions dismantle the cell and result in cell death. Apoptosis begins internally with condensation and subsequent fragmentation of the cell nucleus (blebbing) while the plasma membrane remains intact. Other characteristics of a…	61	0.1415	2.23e-24	3.16e-22
PROGRAMMED_CELL_DEATH	432	Genes annotated by the GO term GO:0012501. Cell death resulting from activation of endogenous cellular processes.	61	0.1412	2.52e-24	3.54e-22
GENTILE_UV_HIGH_DOSE_DN	312	Selected genes down-regulated in WS1 (fibroblast) in response to irradiation with high dose UV-C.	52	0.1667	2.64e-24	3.65e-22
CASORELLI_ACUTE_PROMYELOCYTIC_LEUKEMIA_DN	663	Genes down-regulated in APL (acute promyeolocytic leukemia) blasts expressing PML-RARA fusion [GeneID=5371;5914] compared to normal promyeloblasts.	76	0.1146	3.66e-24	5.01e-22
MODULE_38	465	Placenta genes.	63	0.1355	4.3e-24	5.83e-22
ELVIDGE_HYPOXIA_UP	171	Genes up-regulated in MCF7 cells (breast cancer) under hypoxia conditions.	39	0.2281	1.05e-23	1.4e-21
WAKABAYASHI_ADIPOGENESIS_PPARG_RXRA_BOUND_8D	882	Genes with promoters bound by both PPARG and RXRA [GeneID=5468, 6256] at 8 day time point of adipocyte differentiation of 3T3-L1 cells (preadipocyte).	88	0.0998	1.41e-23	1.86e-21
JIANG_HYPOXIA_NORMAL	311	Genes up-regulated in RPTEC cells (normal kidney) by hypoxia.	51	0.164	1.56e-23	2.04e-21
ZHENG_BOUND_BY_FOXP3	491	Genes whose promoters are bound by FOXP3 [GeneID=50943] based an a ChIP-chip analysis.	64	0.1303	1.57e-23	2.04e-21
TRANSCRIPTION	753	Genes annotated by the GO term GO:0006350. The synthesis of either RNA on a template of DNA or DNA on a template of RNA.	80	0.1062	3.03e-23	3.88e-21
GEORGES_TARGETS_OF_MIR192_AND_MIR215	893	Genes down-regulated in HCT116 cells (colon cancer) by expression of MIR192 or MIR215 [GeneID=406967;406997] at 24 h.	88	0.0985	3.27e-23	4.14e-21
WANG_SMARCE1_TARGETS_DN	371	Genes down-regulated in BT549 cells (breast cancer) by expression of SMARCE1 [GeneID=6605] off a retroviral vector.	55	0.1482	4.33e-23	5.43e-21
ONDER_CDH1_TARGETS_2_UP	256	Genes up-regulated in HMLE cells (immortalized nontransformed mammary epithelium) after E-cadhedrin (CDH1) [GeneID=999] knockdown by RNAi.	46	0.1797	4.62e-23	5.73e-21
ACEVEDO_LIVER_CANCER_UP	973	Genes up-regulated in hepatocellular carcinoma (HCC) compared to normal liver samples.	92	0.0946	5.85e-23	7.19e-21
ELVIDGE_HYPOXIA_BY_DMOG_UP	130	Genes up-regulated in MCF7 cells (breast cancer) treated with hypoxia mimetic DMOG [PubChem=3080614].	34	0.2615	6.31e-23	7.68e-21
REGULATION_OF_METABOLIC_PROCESS	799	Genes annotated by the GO term GO:0019222. Any process that modulates the frequency, rate or extent of the chemical reactions and pathways within a cell or an organism.	82	0.1026	7.95e-23	9.57e-21
IVANOVA_HEMATOPOIESIS_STEM_CELL_AND_PROGENITOR	681	Genes in the expression cluster 'HSC and Progenitors Shared': up-regulated in hematopoietic stem cells (HSC) and progenitors from adult bone marrow and fetal liver.	75	0.1101	8.41e-23	1e-20

## Sheet: S4E Table
Genes	GO_term	Fold Enrichment	p-value (<0.05)	FDR
HIF1A, PTK2B, TGFBR1, VEGFA, ABAT, BNIP3, DPP4, SOD2	response to hypoxia	8.07642	5.58154e-05	0.0907264
HIF1A, PTK2B, TGFBR1, VEGFA, ABAT, BNIP3, DPP4, SOD2	response to oxygen levels	7.67546	7.70868e-05	0.125282
FLI1, EPB41, PLN, VEGFA, ABAT, SERPING1, SOD2, GCH1	blood circulation	5.81849	0.00042574	0.690078
FLI1, EPB41, PLN, VEGFA, ABAT, SERPING1, SOD2, GCH1	circulatory system process	5.81849	0.00042574	0.690078
BDNF, CRYAB, TGFBR1, VEGFA, BNIP3, SOD2, DAPK1, NGF	anti-apoptosis	5.25359	0.000781694	1.26361
NRP2, OSR1, PKP2, GATA6, PLN, TGFBR1, GATA4, SOD2	heart development	5.03367	0.00100413	1.62043
BDNF, CRYAB, TGFBR1, HIPK2, VEGFA, BCL3, BNIP3, SOD2, DAPK1, NGF	negative regulation of apoptosis	3.82147	0.00113456	1.82909
BDNF, CRYAB, TGFBR1, HIPK2, VEGFA, BCL3, BNIP3, SOD2, DAPK1, NGF	negative regulation of programmed cell death	3.76825	0.001251	2.01503
BDNF, CRYAB, TGFBR1, HIPK2, VEGFA, BCL3, BNIP3, SOD2, DAPK1, NGF	negative regulation of cell death	3.75778	0.00127541	2.05397
HIF1A, IL6ST, GATA4	positive regulation vascular endothelial growth factor production	50.73	0.00144249	2.32008
TNFRSF1A, NFKBIZ, HIF1A, PLSCR4, LY96, CFH, C4BPB, VCAN, SERPING1, SOD2, CCL26, NGF	response to wounding	3.06294	0.00167858	2.69496
NFKBIZ, LY96, BNIP3, C4BPB, SERPING1, IL32, CCL26, GCH1, TNFRSF1A, HIF1A, CFH, BCL3, NGF	defense response	2.85958	0.0017384	2.78973
HIF1A, IL6ST, GATA4	regulation of vascular endothelial growth factor production	45.0933	0.0018458	2.95966
TNFRSF1A, NFKBIZ, HIF1A, LY96, CFH, C4BPB, SERPING1, CCL26, NGF	inflammatory response	3.74622	0.00261991	4.17628
BST1, CFH, BCL3, C4BPB, SERPING1	humoral immune response	8.56203	0.00266478	4.24636
TSHZ3, CEBPD, NFIX, MSC, TSC22D1, HOXC6, HOXC8, FLI1, HIF1A, GATA6, GATA4, BCL3, BHLHE40, ZNF219, NFIB, NR5A1	transcription factor activity	2.29091	0.00338626	4.42045
LTBP3, PTK2B, IL6ST, TGFBR1, HIPK2, VEGFA, ROR1, BAMBI, NGF	enzyme linked receptor protein signaling pathway	3.56	0.00357592	5.65901
LY96, BST1, BNIP3, C4BPB, SERPING1, IL32, CCL26, GCH1, MBP, TNFRSF1A, VEGFA, CFH, BCL3	immune response	2.54875	0.00445066	6.99682
RARRES3, IL6ST, TGFBR1, MXI1, SOD2, LAMA1, BDNF, HIF1A, PTK2B, HIPK2, GATA4, VEGFA, NGF, NFIB	regulation of cell proliferation	2.40651	0.00475077	7.45168
GSR, HIF1A, CEBPD, IL6ST, TGFBR1, VEGFA, ABAT, BNIP3, TPD52L1, DPP4, GCH1	protein dimerization activity	2.83325	0.00493937	6.38681
BDNF, GATA6, TGFBR1, VEGFA, GATA4, LGR4, NFIB	tube development	4.30436	0.00551929	8.60699
TSC22D1, HIF1A, CEBPD, GATA4, NFIX, MSC, ZNF219, NR5A1	transcription, DNA-dependent	3.7063	0.00557683	8.69295
TNIK, PTK2B, CRYAB, IL6ST, LY96, TGFBR1, BCL3, STK38L, DAPK1	protein kinase cascade	3.29059	0.00571801	8.90352
HIF1A, PTK2B, IL6ST, TGFBR1, VEGFA	positive regulation of cell motion	6.90204	0.0057659	8.97484
TNFRSF1A, HIF1A, GATA6, HIPK2, VEGFA, GATA4, BCL3, NFIB, NR5A1	positive regulation of transcription from RNA polymerase II promoter	3.28173	0.00580942	9.03962
TSC22D1, HIF1A, CEBPD, GATA4, NFIX, MSC, ZNF219, NR5A1	RNA biosynthetic process	3.65622	0.00599725	9.31866
BDNF, HIPK2, SOD2, NGF	negative regulation of neuron apoptosis	10.6102	0.00613967	9.52972
TSC22D1, HIF1A, CEBPD, GATA4, NFIX, MSC, NR5A1	transcription from RNA polymerase II promoter	4.04684	0.00739819	11.3748
LY96, IL6ST, EFEMP1, CECR1, IL32, SERPING1, CCL26, LAMA1, TGFBI, VEGFA, CFH, ADAMTS10, VCAN, ADAMTS12, NGF	extracellular region part	2.17086	0.00769183	8.91128
TNFRSF1A, IL6ST, HIPK2, VEGFA, CFH, C4BPB, SERPING1	positive regulation of response to stimulus	4.01254	0.00770019	11.8123
GSR, IL6ST, VEGFA, ABAT, BNIP3, TPD52L1, DPP4, GCH1	protein homodimerization activity	3.34376	0.00948338	11.9271
TNFRSF1A, HIF1A, GATA6, PTK2B, TGFBR1, HIPK2, VEGFA, GATA4, BCL3, SOD2, NFIB, NR5A1	positive regulation of cellular biosynthetic process	2.36987	0.0113619	16.9577
ABAT, SOD2, GCH1	negative regulation of blood pressure	17.6452	0.0121361	18.009
TNFRSF1A, HIF1A, GATA6, PTK2B, TGFBR1, HIPK2, VEGFA, GATA4, BCL3, SOD2, NFIB, NR5A1	positive regulation of biosynthetic process	2.33577	0.0125623	18.5823
PTK2B, CRYAB, BNIP3, SOD2	oxygen and reactive oxygen species metabolic process	8.07642	0.0129866	19.1493
PDK1, CRYAB, IL6ST, PGM1, HK2, CHST15	hexose metabolic process	4.2275	0.0133579	19.6425
LAMA1, HIF1A, PTK2B, IL6ST, TGFBR1, VEGFA	regulation of cell motion	4.2056	0.0136356	20.0096
NRP2, HOXC8, BDNF, PTK2B, TGFBR1, VEGFA, VCAN, SOD2, NGF	neuron differentiation	2.77973	0.0149114	21.6755
NRP2, VEGFA		120.227	0.0150458	15.8367
CRYAB, TGFBR1, BCL3, MXI1	regulation of intracellular transport	7.62141	0.0151736	22.0138
TNFRSF1A, HIF1A, GATA4	positive regulation of angiogenesis	15.6092	0.01537	22.2664
TNFRSF1A, BDNF, HIF1A, GATA6, IL6ST, GATA4, NGF	positive regulation of developmental process	3.40633	0.0162901	23.4392
CFH, BCL3, BNIP3, C4BPB, SERPING1	immune effector process	5.04776	0.0168067	24.0904
HOXC6, TNFRSF1A, HOXC8, HIF1A, GATA6, HIPK2, VEGFA, GATA4, BCL3, SOD2, NFIB, NR5A1	regulation of transcription from RNA polymerase II promoter	2.23296	0.0170641	24.4129
GSR, GSTT1, SOD2	glutathione metabolic process	14.4943	0.0177083	25.2145
TNFRSF1A, CFH, C4BPB, SERPING1, GCH1	innate immune response	4.90145	0.018519	26.2119
VEGFA, BCL3, C4BPB, SERPING1	adaptive immune response based on somatic recombination of immune receptors built from immunoglobulin superfamily domains	7.02753	0.0188213	26.5806
VEGFA, BCL3, C4BPB, SERPING1	adaptive immune response	7.02753	0.0188213	26.5806
TNFRSF1A, LY96, GCH1, NGF	response to lipopolysaccharide	7.02753	0.0188213	26.5806
TNFRSF1A, HIF1A, GATA6, TGFBR1, HIPK2, VEGFA, GATA4, BCL3, SOD2, NFIB, NR5A1	positive regulation of nitrogen compound metabolic process	2.31068	0.0192796	27.1363
HOXC6, HOXC8, TGFBR1, HIPK2, GATA4	anterior/posterior pattern formation	4.83143	0.0194144	27.299
HIF1A, CEBPD, HIPK2, NR5A1		6.76387	0.0210644	26.889
TNFRSF1A, HIF1A, GATA6, PTK2B, TGFBR1, HIPK2, VEGFA, GATA4, BCL3, NFIB, NR5A1	positive regulation of macromolecule biosynthetic process	2.27535	0.0212081	29.4316
BCL3, C4BPB, SERPING1	humoral immune response mediated by circulating immunoglobulin	13.0916	0.0214777	29.7471
TNFRSF1A, HIF1A, GATA6, TGFBR1, HIPK2, VEGFA, GATA4, BCL3, NFIB, NR5A1	positive regulation of transcription	2.39858	0.0222418	30.6339
IL6ST, LY96, LTBP3, EFEMP1, CECR1, IL32, C4BPB, SERPING1, EDIL3, CCL26, LAMA1, TNFRSF1A, BDNF, TGFBI, VEGFA, CFH, HEG1, ADAMTS10, VCAN, ADAMTS12, TSKU, DPP4, NGF	extracellular region	1.5898	0.0231914	24.6957
PDK1, CRYAB, IL6ST, PGM1, HK2, CHST15	monosaccharide metabolic process	3.65622	0.0234633	32.0297
TNFRSF1A, HIF1A, GATA6, HIPK2, VEGFA, GATA4, BCL3, NFIB, NR5A1	positive regulation of transcription, DNA-dependent	2.55245	0.0235552	32.1336
TNFRSF1A, HIF1A, GATA6, HIPK2, VEGFA, GATA4, BCL3, NFIB, NR5A1	positive regulation of RNA metabolic process	2.53123	0.0246074	33.3131
HOXC6, HOXC8, HIPK2, BHLHE40, MXI1, MSC, ZNF219	transcription repressor activity	3.09245	0.024668	28.3171
CFH, C4BPB, SERPING1, NGF	protein maturation by peptide bond cleavage	6.29209	0.0251268	33.8882
TNFRSF1A, LY96, GCH1, NGF	response to molecule of bacterial origin	6.29209	0.0251268	33.8882
PDK1, CRYAB, IL6ST, PGM1, HK2	glucose metabolic process	4.42092	0.0258865	34.7211
TNFRSF1A, HIF1A, GATA6, TGFBR1, HIPK2, VEGFA, GATA4, BCL3, NFIB, NR5A1	positive regulation of gene expression	2.3284	0.0263131	35.1844
LAMA1, TGFBI, VEGFA, EFEMP1, ADAMTS10, VCAN, ADAMTS12	proteinaceous extracellular matrix	3.0392	0.0265357	27.7537
HIF1A, PTK2B, IL6ST, VEGFA	positive regulation of cell migration	6.08	0.0274514	36.4057
PDK1, NRP2, SGK1, TNIK, PTK2B, TGFBR1, HIPK2, ROR1, STK38L, DAPK1	protein kinase activity	2.30367	0.0275913	31.1284
HOXC6, TSHZ3, HOXC8, HIF1A, FLI1, CEBPD, GATA6, GATA4, NFIX, NR5A1	sequence-specific DNA binding	2.29987	0.0278466	31.3691
AKR1C2, AKR1C1	trans-1,2-dihydrobenzene-1,2-diol dehydrogenase activity	69.8011	0.0280481	31.5584
SYNE1, EPB41, SVIL, FHOD3, STK38L, SNTA1, SYNPO	actin binding	2.99759	0.0281738	31.6763
HIF1A, IL6ST, GATA4, BCL3	positive regulation of cytokine production	6.01244	0.028251	37.2506
BDNF, HIPK2, SOD2, NGF	regulation of neuron apoptosis	6.01244	0.028251	37.2506
HOXC6, HIF1A, GATA6, HIPK2, GATA4, BCL3, MXI1, MSC, NR5A1	transcription factor binding	2.44916	0.0288797	32.3348
TGFBR1, HIPK2, BCL3, BNIP3, DAPK1, GCH1, NGF	induction of apoptosis	2.95925	0.0299628	39.0241
TGFBR1, HIPK2, BCL3, BNIP3, DAPK1, GCH1, NGF	induction of programmed cell death	2.95003	0.0303585	39.4274
HIF1A, GATA6, NFIX	RNA polymerase II transcription factor activity, enhancer binding	10.7386	0.0310598	34.3317
LAMA1, HIF1A, PTK2B, IL6ST, TGFBR1, HIPK2, VEGFA, NGF	positive regulation of cell proliferation	2.61411	0.0321097	41.1821
CRYAB, AKR1C1, SOD2, GCH1	protein homooligomerization	5.696	0.0324335	41.5012
GSR, ABAT, GSTT1, SOD2, GCH1	cellular amino acid derivative metabolic process	4.0747	0.033518	42.5584
HIF1A, PTK2B, IL6ST, PLN, VEGFA, BNIP3, AKR1C1, SOD2, MBP	chemical homeostasis	2.37797	0.033906	42.9322
TSPAN2, MBP	structural constituent of myelin sheath	55.8409	0.0349377	37.7496
HIF1A, PTK2B, IL6ST, VEGFA	positive regulation of locomotion	5.52163	0.03509	44.059
LAMA1, HIF1A, PTK2B, IL6ST, VEGFA	regulation of cell migration	4.00237	0.0354468	44.3945
TSHZ3, CEBPD, NFIX, MXI1, MSC, HOXC6, TSC22D1, HOXC8, FLI1, HIF1A, GATA6, HIPK2, GATA4, BCL3, BHLHE40, ZNF219, NFIB, NR5A1	transcription regulator activity	1.66193	0.0355437	38.2686
GATA6, TGFBR1, VEGFA, NFIB	lung development	5.46586	0.0359998	44.9106
HIF1A, SOD2	oxygen homeostasis	54.112	0.0360644	44.9706
BCL3, MXI1, NR5A1	maintenance of protein location in cell	9.89854	0.0361348	45.0359
LAMA1, TGFBI, VEGFA, EFEMP1, ADAMTS10, VCAN, ADAMTS12	extracellular matrix	2.81897	0.0363829	36.1087
PTK2B, TGFBR1, NGF	positive regulation of cell growth	9.66286	0.0377641	46.5275
CFH, C4BPB, SERPING1	complement activation	9.66286	0.0377641	46.5275
NRP2, BDNF, PTK2B, VEGFA, VCAN, SOD2, NGF	neuron development	2.79339	0.0380783	46.8107
GATA6, TGFBR1, VEGFA, NFIB	respiratory tube development	5.3051	0.0388019	47.4576
TNFRSF1A, CRYAB, AKR1C1, SOD2, GCH1	protein oligomerization	3.88736	0.0388025	47.4581
TNFRSF1A, HIF1A, GATA6, TGFBR1, HIPK2, VEGFA, GATA4, BCL3, NFIB, NR5A1	positive regulation of nucleobase, nucleoside, nucleotide and nucleic acid metabolic process	2.16795	0.0389299	47.5713
CFH, C4BPB, SERPING1	activation of plasma proteins involved in acute inflammatory response	9.43814	0.0394211	48.0054
PKP2, PLN, GATA4		9.46604	0.0394787	40.5422
LTBP3, TGFBR1, HIPK2, BAMBI	transmembrane receptor protein serine/threonine kinase signaling pathway	5.25359	0.03976	48.3029
TGFBR1, BCL3, MXI1	regulation of protein import into nucleus	9.22364	0.0411054	49.4682
AKR1C2, AKR1C1	bile acid binding	46.5341	0.0417789	43.3812
EPB41, CRYAB, SVIL, STK38L, DAPK1, SYNPO	actin cytoskeleton	3.09892	0.042886	41.13
HIF1A, SOD2	gas homeostasis	45.0933	0.0431212	51.1682
FLI1, PLSCR4, C4BPB, SERPING1	hemostasis	5.01037	0.0447296	52.486
GATA6, TGFBR1, VEGFA, NFIB	respiratory system development	5.01037	0.0447296	52.486
