# Supplementary material for: Epigenetic Alterations Affecting Transcription Factors and Signaling Pathways in Stromal Cells of Endometriosis
Source: PLoS One. 2017 Jan 26;12(1):e0170859. doi: 10.1371/journal.pone.0170859 (PMC5268815; doi:10.1371/journal.pone.0170859)
Supplement: S5 Table — This is a complete list of DM and DE genes in endometriotic stroma identified by overlapping the gene lists of DM genes identified by our stringent (A) and lenient criteria (B) with the gene list created by computational analysis of the CpGs and genomic segments with strong correlation between methylation and expression (cut-off p<0.005 and correlation coefficient>0.7; average FPKM>1 in at least one of the groups) independently of the disease status. (XLSX) [file pone.0170859.s013.xlsx]

## Sheet: S5A Table
targetid	chr	mapinfo	1	mean fractional methyl. norm	mean fractional methyl. Endometriosis	methylation diff	Methyl ttest	Methyl FDR	mean FPKM norm	mean FPKM endometriosis	Correlation d irection	Rho correlation coefficient	R square	p-value	FDR	tb7575_norm	tb7576_norm	tb7577_norm	tb7578_endom	tb7579_endom	tb7580_endom	tb9107_endom	tb9110_norm	tb9112_norm	g_tb7575_norm	g_tb7576_norm	g_tb7577_norm	g_tb7578_endom	g_tb7579_endom	g_tb7580_endom	g_tb9107_endom	g_tb9110_norm	g_tb9112_norm
cg10574431	5	148585706	ABLIM3	0.07683	0.324368	0.247538	0.0439713	0.537938	19.3106	7.31021	negative	-0.900437	0.810786	0.00092914	0.210379	0.07653	0.07895	0.10925	0.52402	0.15565	0.4935	0.34577	0.05492	0.0645	15.2034	18.2508	21.4753	6.34973	11.7747	0.982327	10.1341	23.1978	18.4255
cg02384911	17	907886	ABR	0.779854	0.62679	-0.153064	0.0247799	0.502452	13.1163	18.9298	negative	-0.929439	0.863856	0.00028665	0.142365	0.76563	0.76998	0.78694	0.51057	0.64206	0.59471	0.60351	0.76215	0.81457	11.9078	14.3073	14.4922	21.8453	14.9661	20.041	18.8668	12.6827	12.1917
cg19029445	17	907732	ABR	0.869882	0.631006	-0.238876	0.0270847	0.505579	13.1163	18.9298	negative	-0.885994	0.784986	0.00147107	0.247264	0.82897	0.90318	0.8354	0.5641	0.6473	0.51071	0.53004	0.85969	0.92217	11.9078	14.3073	14.4922	21.8453	14.9661	20.041	18.8668	12.6827	12.1917
cg09580592	17	907643	ABR	0.873752	0.620136	-0.253616	0.0222092	0.495506	13.1163	18.9298	negative	-0.918742	0.844088	0.00046477	0.165344	0.88637	0.84626	0.86028	0.50295	0.61364	0.53734	0.54829	0.83902	0.93683	11.9078	14.3073	14.4922	21.8453	14.9661	20.041	18.8668	12.6827	12.1917
cg09909478	17	1085475	ABR	0.825314	0.551578	-0.273736	0.0129287	0.458358	13.1163	18.9298	negative	-0.837292	0.701059	0.00486058	0.363641	0.7909	0.79456	0.80038	0.48848	0.52811	0.55245	0.39079	0.84128	0.89945	11.9078	14.3073	14.4922	21.8453	14.9661	20.041	18.8668	12.6827	12.1917
cg19324627	11	116708329	APOA1	0.702886	0.458344	-0.244542	0.0126647	0.456552	0.0438815	12.5889	negative	-0.941278	0.886005	0.0001525	0.110048	0.7513	0.69066	0.67214	0.41961	0.65132	0.30575	0.38854	0.66328	0.73705	0	0	0	7.95968	1.1453	21.9666	19.284	0.165098	0.0543094
cg03010018	11	116708299	APOA1	0.87131	0.630082	-0.241228	0.0144077	0.466483	0.0438815	12.5889	negative	-0.96115	0.923809	3.663e-05	0.0601061	0.84659	0.8012	0.87616	0.66458	0.80851	0.46526	0.51476	0.87284	0.95976	0	0	0	7.95968	1.1453	21.9666	19.284	0.165098	0.0543094
cg26734040	11	116708517	APOA1	0.678082	0.395352	-0.28273	0.00372335	0.342875	0.0438815	12.5889	negative	-0.961634	0.92474	3.508e-05	0.0584252	0.69537	0.71845	0.63627	0.46999	0.54801	0.26622	0.33376	0.66352	0.6768	0	0	0	7.95968	1.1453	21.9666	19.284	0.165098	0.0543094
cg00997251	5	142444988	ARHGAP26	0.600436	0.111786	-0.48865	2.764e-06	0.0333972	0.675617	1.59078	negative	-0.873612	0.763199	0.00208398	0.278355	0.60918	0.67142	0.56953	0.04445	0.19198	0.09873	0.05631	0.5024	0.64965	0.448196	0.773408	0.489976	1.18867	1.39875	1.92443	1.85128	1.01861	0.647897
cg11796181	5	142422241	ARHGAP26	0.89171	0.63047	-0.26124	0.027752	0.506724	0.675617	1.59078	negative	-0.88605	0.785085	0.00146864	0.247136	0.89352	0.883	0.88639	0.55079	0.75535	0.52689	0.45064	0.86244	0.9332	0.448196	0.773408	0.489976	1.18867	1.39875	1.92443	1.85128	1.01861	0.647897
cg07648709	11	73043675	ARHGEF17	0.116528	0.349174	0.232646	0.0316929	0.514256	34.7369	15.3221	negative	-0.893367	0.798105	0.00117288	0.22942	0.12887	0.12611	0.13809	0.36502	0.28092	0.52636	0.46149	0.11531	0.07426	30.2967	26.1147	31.1143	14.8256	21.132	10.7302	14.6006	44.8428	41.3162
cg06059409	11	73036247	ARHGEF17	0.096538	0.411598	0.31506	0.030071	0.510785	34.7369	15.3221	negative	-0.875949	0.767286	0.0019569	0.272413	0.11418	0.09776	0.11299	0.4558	0.26419	0.64185	0.57128	0.09583	0.06193	30.2967	26.1147	31.1143	14.8256	21.132	10.7302	14.6006	44.8428	41.3162
cg14108978	11	73021145	ARHGEF17	0.224018	0.623508	0.39949	0.0333402	0.516822	34.7369	15.3221	negative	-0.884227	0.781857	0.00154967	0.251231	0.26617	0.19318	0.28479	0.72152	0.42983	0.91728	0.81439	0.18293	0.19302	30.2967	26.1147	31.1143	14.8256	21.132	10.7302	14.6006	44.8428	41.3162
cg23460145	11	73073425	ARHGEF17	0.375044	0.535424	0.16038	0.00214906	0.29251	34.7369	15.3221	negative	-0.842141	0.709202	0.00439413	0.353435	0.40148	0.43532	0.35111	0.55878	0.59698	0.49462	0.58016	0.35328	0.33403	30.2967	26.1147	31.1143	14.8256	21.132	10.7302	14.6006	44.8428	41.3162
cg15012214	3	56810320	ARHGEF3	0.725796	0.392936	-0.33286	4.376e-05	0.0827694	1.11087	4.56845	negative	-0.851454	0.724973	0.00358598	0.336921	0.67722	0.6641	0.78098	0.38639	0.30924	0.34509	0.44439	0.71849	0.78819	1.3114	1.59562	1.20478	7.05214	4.34883	4.17696	2.69588	0.650199	0.792359
cg12325605	3	56810151	ARHGEF3	0.818734	0.556694	-0.26204	0.00188905	0.279379	1.11087	4.56845	negative	-0.840224	0.705976	0.00457473	0.357587	0.80379	0.82887	0.8378	0.52471	0.42281	0.53325	0.62759	0.74572	0.87749	1.3114	1.59562	1.20478	7.05214	4.34883	4.17696	2.69588	0.650199	0.792359
cg06044945	2	131722957	ARHGEF4	0.568064	0.314518	-0.253546	0.0158738	0.47441	0.5593	4.01964	negative	-0.954106	0.910318	6.519e-05	0.0746889	0.482	0.61992	0.57704	0.37578	0.39268	0.10665	0.21988	0.58145	0.57991	1.22032	0.198062	0.403004	1.68496	1.45248	7.49259	5.44853	0.55372	0.421396
cg02695969	19	932813	ARID3A	0.072552	0.410348	0.337796	0.0215191	0.494504	9.62694	4.21134	negative	-0.888269	0.789022	0.00137404	0.241895	0.06729	0.09053	0.08856	0.50301	0.25644	0.59775	0.5665	0.06913	0.04725	7.50772	7.26168	9.6047	4.47658	7.66735	1.3704	3.33102	12.9486	10.812
cg01950129	19	941919	ARID3A	0.535556	0.691152	0.155596	0.035711	0.520087	9.62694	4.21134	negative	-0.844213	0.712696	0.0042045	0.350854	0.47308	0.58816	0.56285	0.72494	0.51251	0.78844	0.78136	0.46944	0.58425	7.50772	7.26168	9.6047	4.47658	7.66735	1.3704	3.33102	12.9486	10.812
cg19546700	19	939596	ARID3A	0.497264	0.756842	0.259578	0.0372398	0.523365	9.62694	4.21134	negative	-0.964566	0.930388	2.663e-05	0.0512788	0.5946	0.59713	0.49956	0.88113	0.62015	0.92432	0.87351	0.41187	0.38316	7.50772	7.26168	9.6047	4.47658	7.66735	1.3704	3.33102	12.9486	10.812
cg18598117	19	941126	ARID3A	0.17725	0.613004	0.435754	0.00230948	0.298632	9.62694	4.21134	negative	-0.841066	0.707392	0.00449481	0.354637	0.22553	0.09465	0.26217	0.64396	0.52711	0.79598	0.7224	0.1862	0.1177	7.50772	7.26168	9.6047	4.47658	7.66735	1.3704	3.33102	12.9486	10.812
cg12713583	19	940724	ARID3A	0.094856	0.42615	0.331294	0.0146892	0.467977	9.62694	4.21134	negative	-0.853831	0.729027	0.00339739	0.330695	0.10411	0.10215	0.11297	0.4944	0.315	0.52088	0.63	0.10325	0.0518	7.50772	7.26168	9.6047	4.47658	7.66735	1.3704	3.33102	12.9486	10.812
cg08894487	19	941243	ARID3A	0.194926	0.595008	0.400082	0.0261835	0.504148	9.62694	4.21134	negative	-0.839173	0.704211	0.00467585	0.359946	0.28095	0.07372	0.27159	0.61637	0.42073	0.81936	0.88022	0.21113	0.13724	7.50772	7.26168	9.6047	4.47658	7.66735	1.3704	3.33102	12.9486	10.812
cg26857315	19	932759	ARID3A	0.05055	0.525574	0.475024	0.0239131	0.500348	9.62694	4.21134	negative	-0.897469	0.80545	0.00102666	0.218012	0.04359	0.09448	0.05076	0.64484	0.26121	0.8228	0.74805	0.04425	0.01967	7.50772	7.26168	9.6047	4.47658	7.66735	1.3704	3.33102	12.9486	10.812
cg02001279	19	940967	ARID3A	0.125914	0.48781	0.361896	0.00074107	0.210691	9.62694	4.21134	negative	-0.855783	0.732365	0.0032477	0.326299	0.19142	0.11448	0.14215	0.55376	0.43499	0.56662	0.56473	0.12113	0.06039	7.50772	7.26168	9.6047	4.47658	7.66735	1.3704	3.33102	12.9486	10.812
cg22035959	19	951681	ARID3A	0.022418	0.255896	0.233478	0.0347464	0.518868	9.62694	4.21134	negative	-0.871801	0.760038	0.00218636	0.281332	0.02399	0.02572	0.01012	0.34948	0.11891	0.42336	0.34841	0.04418	0.00808	7.50772	7.26168	9.6047	4.47658	7.66735	1.3704	3.33102	12.9486	10.812
cg18522931	10	63776828	ARID5B	0.08687	0.423426	0.336556	0.0381185	0.524441	52.5461	33.109	negative	-0.852874	0.727394	0.00347247	0.3335	0.07938	0.12176	0.12127	0.68931	0.19318	0.56811	0.54069	0.05782	0.05412	62.2317	53.3685	39.9684	23.2277	38.2766	35.3048	35.627	52.6592	54.5028
cg01445163	17	41477300	ARL4D	0.943202	0.431742	-0.51146	0.0250203	0.502876	8.77483	22.1703	negative	-0.918798	0.84419	0.00046369	0.165291	0.92143	0.93413	0.93948	0.35118	0.64518	0.05083	0.23791	0.94802	0.97295	12.2187	8.06	8.268	16.6251	12.2165	35.8268	24.0128	4.63085	10.6966
cg27147556	17	41477350	ARL4D	0.979454	0.424078	-0.555376	0.0174898	0.481919	8.77483	22.1703	negative	-0.908891	0.826082	0.00068691	0.191487	0.97227	0.97587	0.96365	0.31993	0.60047	0.01666	0.32558	0.99374	0.99174	12.2187	8.06	8.268	16.6251	12.2165	35.8268	24.0128	4.63085	10.6966
cg19252218	17	41477271	ARL4D	0.828488	0.382962	-0.445526	0.031115	0.513554	8.77483	22.1703	negative	-0.888697	0.789782	0.0013563	0.241123	0.80627	0.85978	0.78621	0.2201	0.66684	0.07661	0.19317	0.82528	0.8649	12.2187	8.06	8.268	16.6251	12.2165	35.8268	24.0128	4.63085	10.6966
cg18256949	17	41477468	ARL4D	0.894842	0.456516	-0.438326	0.0293803	0.509455	8.77483	22.1703	negative	-0.90304	0.815481	0.00084908	0.202001	0.84478	0.90162	0.8776	0.31394	0.6675	0.12621	0.31777	0.9009	0.94931	12.2187	8.06	8.268	16.6251	12.2165	35.8268	24.0128	4.63085	10.6966
cg02449461	11	75061838	ARRB1	0.374142	0.530438	0.156296	0.016096	0.475591	6.2675	4.61641	negative	-0.851691	0.725378	0.00356683	0.336822	0.33144	0.36302	0.39645	0.59445	0.41196	0.53372	0.63994	0.37657	0.40323	5.8365	7.61273	5.94857	3.78952	7.79082	4.18925	2.69605	5.79086	6.14883
cg11577898	5	78094446	ARSB	0.848526	0.661974	-0.186552	0.0182899	0.485796	10.2211	15.5751	negative	-0.904741	0.818556	0.00079945	0.199852	0.8247	0.88093	0.80835	0.61602	0.66276	0.65365	0.53482	0.84361	0.88504	10.0403	9.7217	11.0306	13.5586	12.7586	15.8373	20.1459	9.73994	10.573
cg04165366	8	131154466	ASAP1	0.245394	0.612802	0.367408	0.0119958	0.451908	52.2268	37.5749	negative	-0.842568	0.709921	0.0043546	0.352963	0.17883	0.41934	0.28195	0.74096	0.69406	0.80186	0.53679	0.19382	0.15303	58.1947	44.8661	50.2941	42.436	43.8213	28.4489	35.5933	57.605	50.174
cg27391403	13	113416621	ATP11A	0.829756	0.495726	-0.33403	0.0113402	0.447817	5.26886	11.0742	negative	-0.842877	0.710441	0.00432618	0.352674	0.82836	0.83162	0.82987	0.47821	0.36657	0.35574	0.50188	0.80374	0.85519	4.60375	4.46004	5.67737	11.8027	7.74628	15.0124	9.73538	6.96448	4.63868
cg23963517	10	60473872	BICC1	0.862498	0.695796	-0.166702	0.0308866	0.513182	16.1389	29.0711	negative	-0.940794	0.885093	0.00015688	0.112223	0.84775	0.87496	0.85271	0.56367	0.83342	0.60338	0.69271	0.85058	0.88649	20.4544	11.8629	13.4395	36.2333	14.5079	39.8194	25.7239	21.3204	13.6175
cg05921889	7	34076103	BMPER	0.899814	0.63507	-0.264744	0.0387702	0.526172	2.36067	12.2812	negative	-0.868588	0.754445	0.00237646	0.289356	0.88906	0.90243	0.8436	0.38859	0.77812	0.63166	0.50258	0.92633	0.93765	1.70574	2.00695	4.82077	24.492	7.64718	10.2065	6.77914	1.57671	1.6932
cg01715680	14	93725377	BTBD7	0.035438	0.230248	0.19481	0.0314936	0.514122	11.3957	8.8998	negative	-0.876117	0.767581	0.00194794	0.272198	0.03633	0.0557	0.03849	0.29801	0.15149	0.25724	0.39734	0.03765	0.00902	11.1903	9.95412	11.9318	9.82504	9.25961	8.76452	7.75003	11.8373	12.0648
cg03505817	14	93735925	BTBD7	0.237114	0.548704	0.31159	0.00485987	0.370322	11.3957	8.8998	negative	-0.88395	0.781367	0.00156225	0.251593	0.14526	0.34415	0.22261	0.57258	0.39116	0.62088	0.7358	0.32963	0.14392	11.1903	9.95412	11.9318	9.82504	9.25961	8.76452	7.75003	11.8373	12.0648
cg21634628	3	15687271	BTD	0.064944	0.497324	0.43238	0.0245891	0.502264	12.2902	8.07655	negative	-0.921759	0.84964	0.00040836	0.160321	0.05104	0.06557	0.0871	0.58946	0.33879	0.70757	0.75467	0.08671	0.0343	12.1784	11.929	14.2413	8.06468	10.1765	6.30981	7.75521	10.8857	12.2164
cg17989313	10	11866971	C10orf47	0.76298	0.46366	-0.29932	0.00886525	0.427644	1.14325	2.98161	negative	-0.877096	0.769297	0.0018965	0.270515	0.82087	0.81334	0.66356	0.44336	0.38669	0.52258	0.68775	0.76874	0.74839	0.778172	0.678955	1.35979	2.2385	4.81497	3.65658	1.21638	1.3312	1.56813
cg22819767	10	11866910	C10orf47	0.682608	0.392314	-0.290294	0.0108806	0.442349	1.14325	2.98161	negative	-0.857629	0.735527	0.00311041	0.321365	0.71638	0.78423	0.60634	0.34272	0.35578	0.40721	0.64373	0.68788	0.61821	0.778172	0.678955	1.35979	2.2385	4.81497	3.65658	1.21638	1.3312	1.56813
cg07091481	10	82169149	C10orf58	0.26213	0.67792	0.41579	0.0245794	0.502264	54.6018	11.6888	negative	-0.861034	0.74138	0.00286768	0.311799	0.42022	0.18849	0.27244	0.81805	0.5163	0.9188	0.86507	0.26478	0.16472	45.02	65.5083	81.154	8.27776	32.6167	1.54631	4.31427	45.2185	36.1082
cg12069540	10	82173570	C10orf58	0.128544	0.47767	0.349126	0.027369	0.5061	54.6018	11.6888	negative	-0.856238	0.733143	0.00321351	0.32468	0.16457	0.10487	0.15667	0.63461	0.29232	0.62769	0.66798	0.12539	0.09122	45.02	65.5083	81.154	8.27776	32.6167	1.54631	4.31427	45.2185	36.1082
cg19862899	10	82173556	C10orf58	0.18389	0.565104	0.381214	0.0325146	0.515984	54.6018	11.6888	negative	-0.870772	0.758244	0.00224604	0.284839	0.2762	0.11377	0.19592	0.78008	0.36382	0.74393	0.7476	0.20127	0.13229	45.02	65.5083	81.154	8.27776	32.6167	1.54631	4.31427	45.2185	36.1082
cg05373256	11	61522178	C11orf9	0.658774	0.337378	-0.321396	0.0373705	0.523371	6.2569	42.3579	negative	-0.850759	0.72379	0.00364246	0.337469	0.81338	0.66244	0.47391	0.15962	0.40538	0.17965	0.22666	0.81316	0.53098	0.844985	3.70037	10.3334	77.4894	11.3554	43.128	37.4587	2.66077	13.745
cg10296238	21	47605174	C21orf56	0.73217	0.322594	-0.409576	0.0130352	0.459105	4.02273	7.71118	negative	-0.85561	0.732068	0.00326082	0.326658	0.62509	0.6975	0.81129	0.62561	0.13748	0.18358	0.15237	0.69783	0.82914	4.076	6.66217	2.31358	6.70914	7.77673	8.01414	8.3447	4.44602	2.61587
cg13732083	21	47605072	C21orf56	0.519904	0.173654	-0.34625	0.00156831	0.26485	4.02273	7.71118	negative	-0.914151	0.835672	0.00056078	0.176803	0.4012	0.45882	0.585	0.29773	0.0733	0.10456	0.08149	0.4711	0.6834	4.076	6.66217	2.31358	6.70914	7.77673	8.01414	8.3447	4.44602	2.61587
cg08742575	21	47604166	C21orf56	0.555946	0.324708	-0.231238	0.0404271	0.529519	4.02273	7.71118	negative	-0.901221	0.812199	0.0009045	0.208279	0.52363	0.43605	0.63339	0.40744	0.40122	0.10694	0.17943	0.50733	0.67933	4.076	6.66217	2.31358	6.70914	7.77673	8.01414	8.3447	4.44602	2.61587
cg13012494	21	47604986	C21orf56	0.471378	0.207824	-0.263554	0.0131484	0.459712	4.02273	7.71118	negative	-0.859239	0.738292	0.00299394	0.31666	0.45936	0.43704	0.51073	0.40835	0.08557	0.14528	0.08759	0.43026	0.5195	4.076	6.66217	2.31358	6.70914	7.77673	8.01414	8.3447	4.44602	2.61587
cg05896524	21	47604654	C21orf56	0.542106	0.2472	-0.294906	0.00349006	0.337954	4.02273	7.71118	negative	-0.862281	0.743528	0.0027822	0.308575	0.45431	0.53779	0.61496	0.3867	0.11039	0.19998	0.16615	0.51897	0.5845	4.076	6.66217	2.31358	6.70914	7.77673	8.01414	8.3447	4.44602	2.61587
cg12016809	21	47604291	C21orf56	0.373062	0.150232	-0.22283	0.00852493	0.424696	4.02273	7.71118	negative	-0.952454	0.907169	7.365e-05	0.0786818	0.45866	0.24692	0.44965	0.19319	0.07865	0.08432	0.08025	0.28559	0.42449	4.076	6.66217	2.31358	6.70914	7.77673	8.01414	8.3447	4.44602	2.61587
cg05287372	3	69058876	C3orf64	0.72798	0.426762	-0.301218	0.002522	0.30736	8.57857	16.0687	negative	-0.893593	0.798508	0.00116448	0.228985	0.68726	0.76637	0.73983	0.54079	0.53338	0.29889	0.34792	0.72778	0.71866	8.57134	8.31473	9.70028	12.6835	10.5811	25.3033	15.7069	7.90648	8.4
cg22620797	3	69061827	C3orf64	0.853178	0.547988	-0.30519	0.0188148	0.486632	8.57857	16.0687	negative	-0.892575	0.796689	0.00120271	0.231651	0.73344	0.87857	0.85662	0.52825	0.63172	0.29972	0.47115	0.8488	0.94846	8.57134	8.31473	9.70028	12.6835	10.5811	25.3033	15.7069	7.90648	8.4
cg21571160	1	207262553	C4BPB	0.845178	0.452282	-0.392896	0.0422904	0.533704	0.0917777	5.72392	negative	-0.985694	0.971593	1.137e-06	0.0195962	0.81746	0.87848	0.82886	0.31384	0.72712	0.20721	0.19155	0.82066	0.88043	0.0513742	0	0	5.28166	1.18584	7.49007	8.9381	0.356965	0.0505492
cg14740771	1	207262428	C4BPB	0.889516	0.504188	-0.385328	0.0405525	0.529976	0.0917777	5.72392	negative	-0.982304	0.96492	2.386e-06	0.0214429	0.85443	0.90316	0.87802	0.36966	0.71862	0.28445	0.24764	0.88674	0.92523	0.0513742	0	0	5.28166	1.18584	7.49007	8.9381	0.356965	0.0505492
cg08554603	7	120702049	C7orf58	0.240262	0.560044	0.319782	0.00493118	0.371504	23.4183	6.3915	negative	-0.838203	0.702585	0.00477048	0.361449	0.29764	0.27866	0.22336	0.71779	0.58395	0.53682	0.62145	0.22052	0.18113	20.2472	28.552	25.4746	6.7015	12.6587	3.0378	3.16799	26.0844	16.7335
cg17533232	7	120852287	C7orf58	0.193936	0.632768	0.438832	0.0098233	0.434852	23.4183	6.3915	negative	-0.918788	0.844171	0.00046388	0.165291	0.27374	0.17969	0.20045	0.79827	0.37712	0.78044	0.80012	0.16081	0.15499	20.2472	28.552	25.4746	6.7015	12.6587	3.0378	3.16799	26.0844	16.7335
cg22645201	7	120701829	C7orf58	0.25931	0.658596	0.399286	0.0118836	0.451246	23.4183	6.3915	negative	-0.933773	0.871933	0.0002306	0.131035	0.32542	0.23231	0.27337	0.84303	0.51949	0.75281	0.81696	0.21649	0.24896	20.2472	28.552	25.4746	6.7015	12.6587	3.0378	3.16799	26.0844	16.7335
cg08166587	12	2696048	CACNA1C	0.096328	0.391192	0.294864	0.00884879	0.427442	1.84369	1.12949	negative	-0.853444	0.728367	0.00342757	0.332188	0.10086	0.12071	0.1277	0.48764	0.26935	0.59437	0.32142	0.05697	0.0754	2.09204	1.98557	1.36361	0.898744	1.12955	0.81047	1.67919	1.82317	1.95407
cg02516189	9	139268092	CARD9	0.104616	0.541088	0.436472	0.0191235	0.487198	7.06914	1.34738	negative	-0.843728	0.711878	0.00424836	0.351047	0.13354	0.1254	0.10237	0.69326	0.3311	0.7726	0.71014	0.08237	0.0794	5.6906	4.99938	4.49269	0.599546	3.4659	0.500336	0.82373	11.5869	8.57611
cg05002800	20	32231392	CBFA2T2	0.743358	0.551166	-0.192192	0.00440092	0.358168	1.95228	3.07278	negative	-0.893324	0.798027	0.00117449	0.229458	0.76902	0.77351	0.73333	0.56359	0.64309	0.42959	0.50421	0.66784	0.77309	2.09435	1.72362	1.84494	3.14459	1.88169	3.38779	3.87706	2.20027	1.89824
cg12943082	7	75419311	CCL26	0.553624	0.354838	-0.198786	0.0254756	0.503594	0.867829	6.78766	negative	-0.846305	0.716231	0.0040189	0.347681	0.56702	0.4494	0.55846	0.37404	0.44125	0.18128	0.26355	0.62503	0.56821	1.5895	0.10052	1.29519	7.06632	4.44365	6.79806	8.84261	1.15002	0.203917
cg05556717	7	75419304	CCL26	0.5549	0.400508	-0.154392	0.0231467	0.49775	0.867829	6.78766	negative	-0.856949	0.734362	0.00316048	0.323302	0.54059	0.56562	0.55285	0.44165	0.45244	0.24895	0.36222	0.57633	0.53911	1.5895	0.10052	1.29519	7.06632	4.44365	6.79806	8.84261	1.15002	0.203917
cg10598030	7	75419119	CCL26	0.54082	0.312814	-0.228006	0.0282994	0.507815	0.867829	6.78766	negative	-0.901358	0.812446	0.00090023	0.207899	0.56745	0.50154	0.54953	0.33154	0.34365	0.12339	0.22832	0.52325	0.56233	1.5895	0.10052	1.29519	7.06632	4.44365	6.79806	8.84261	1.15002	0.203917
cg06419846	11	66083697	CD248	0.03236	0.295072	0.262712	0.0461567	0.541283	280.48	89.6449	negative	-0.903176	0.815727	0.00084503	0.201819	0.03982	0.02956	0.04484	0.54299	0.07334	0.4357	0.32416	0.03116	0.01642	221.12	342.994	187.279	30.2769	206.606	25.8492	95.8473	338.694	312.311
cg19090861	11	66085958	CD248	0.164856	0.362128	0.197272	0.0204118	0.491437	280.48	89.6449	negative	-0.848475	0.71991	0.00383228	0.342858	0.18213	0.17778	0.17783	0.40531	0.32554	0.40612	0.49845	0.16525	0.12129	221.12	342.994	187.279	30.2769	206.606	25.8492	95.8473	338.694	312.311
cg14027234	11	66084163	CD248	0.06443	0.217856	0.153426	0.0424132	0.534033	280.48	89.6449	negative	-0.853897	0.729141	0.00339221	0.330416	0.05257	0.09222	0.06833	0.35694	0.08756	0.25095	0.28886	0.05861	0.05042	221.12	342.994	187.279	30.2769	206.606	25.8492	95.8473	338.694	312.311
cg05478809	11	66082889	CD248	0.10181	0.573566	0.471756	0.0265738	0.504772	280.48	89.6449	negative	-0.906586	0.821897	0.00074794	0.196383	0.12539	0.11706	0.09934	0.80017	0.34235	0.80615	0.77215	0.09299	0.07427	221.12	342.994	187.279	30.2769	206.606	25.8492	95.8473	338.694	312.311
cg22213242	11	66083573	CD248	0.16465	0.512962	0.348312	0.0124422	0.454696	280.48	89.6449	negative	-0.891789	0.795287	0.0012328	0.233116	0.15837	0.18201	0.17119	0.60748	0.40325	0.73534	0.55283	0.18369	0.12799	221.12	342.994	187.279	30.2769	206.606	25.8492	95.8473	338.694	312.311
cg17351376	11	66082046	CD248	0.099796	0.437324	0.337528	0.0222738	0.495669	280.48	89.6449	negative	-0.910878	0.829699	0.00063715	0.184639	0.09268	0.11244	0.11759	0.66074	0.23537	0.5692	0.52575	0.08666	0.08961	221.12	342.994	187.279	30.2769	206.606	25.8492	95.8473	338.694	312.311
cg11067179	11	66083541	CD248	0.048462	0.308578	0.260116	0.0481349	0.544455	280.48	89.6449	negative	-0.884391	0.782147	0.00154226	0.2503	0.05345	0.05866	0.05231	0.54432	0.14483	0.51337	0.23553	0.04572	0.03217	221.12	342.994	187.279	30.2769	206.606	25.8492	95.8473	338.694	312.311
cg12782654	11	66085299	CD248	0.086652	0.243096	0.156444	0.0393928	0.52757	280.48	89.6449	negative	-0.900031	0.810055	0.00094208	0.21063	0.10212	0.10764	0.0925	0.3107	0.12029	0.35582	0.31713	0.08076	0.05024	221.12	342.994	187.279	30.2769	206.606	25.8492	95.8473	338.694	312.311
cg20367218	11	66083224	CD248	0.056888	0.455292	0.398404	0.0206651	0.492716	280.48	89.6449	negative	-0.909077	0.82642	0.00068214	0.191177	0.06206	0.06305	0.06064	0.60207	0.25471	0.71961	0.54673	0.05937	0.03932	221.12	342.994	187.279	30.2769	206.606	25.8492	95.8473	338.694	312.311
cg08696931	12	123754071	CDK2AP1	0.058948	0.307096	0.248148	0.0157408	0.473826	208.895	123.782	negative	-0.953048	0.9083	7.052e-05	0.0783947	0.07637	0.07426	0.06722	0.37708	0.26336	0.41876	0.39488	0.04807	0.02882	202.338	191.816	230.478	133.992	128.512	107.261	125.362	206.815	213.027
cg10502957	12	123757070	CDK2AP1	0.164552	0.328024	0.163472	0.0187917	0.486632	208.895	123.782	negative	-0.870208	0.757261	0.00227927	0.285674	0.17983	0.19064	0.17289	0.31708	0.40159	0.2968	0.43925	0.12347	0.15593	202.338	191.816	230.478	133.992	128.512	107.261	125.362	206.815	213.027
cg14944166	7	136686832	CHRM2	0.652774	0.807094	0.15432	0.0043751	0.357578	56.7078	5.18803	negative	-0.942985	0.889221	0.00013778	0.105665	0.72566	0.67047	0.5909	0.83877	0.71942	0.86038	0.84707	0.69512	0.58172	44.6023	49.29	63.2695	2.87062	15.5883	0.315642	1.97754	54.9918	71.3855
cg02908942	12	104849615	CHST11	0.817674	0.516932	-0.300742	0.0408469	0.530864	0.438885	2.34766	negative	-0.948024	0.89875	0.00010016	0.0892828	0.83319	0.79258	0.80214	0.31256	0.77278	0.42298	0.32156	0.75432	0.90614	0.369205	0.199123	0.340484	3.66381	0.65036	2.78225	2.29423	0.874573	0.411042
cg20794824	3	170138205	CLDN11	0.895972	0.350566	-0.545406	0.0252647	0.503305	39.9383	225.155	negative	-0.868316	0.753972	0.00239308	0.290357	0.88098	0.89279	0.90161	0.11573	0.5943	0.06327	0.13197	0.87673	0.92775	37.4018	65.3038	28.9319	344.838	90.969	348.162	116.65	39.2673	28.7866
cg17183531	3	48603978	COL7A1	0.484702	0.686206	0.201504	0.0115488	0.44857	35.5298	5.93058	negative	-0.836517	0.699761	0.00493818	0.366323	0.47934	0.54946	0.48985	0.62549	0.57715	0.80682	0.80622	0.40245	0.50241	19.5056	28.7365	42.7246	6.64002	10.0381	1.01607	6.02815	50.9354	35.7469
cg08977790	3	48633441	COL7A1	0.066656	0.32729	0.260634	0.0222011	0.495506	35.5298	5.93058	negative	-0.847869	0.718881	0.0038838	0.344223	0.06484	0.08601	0.07604	0.40151	0.23551	0.43341	0.47677	0.05892	0.04747	19.5056	28.7365	42.7246	6.64002	10.0381	1.01607	6.02815	50.9354	35.7469
cg23429240	12	109040983	CORO1C	0.068846	0.239674	0.170828	0.0360383	0.521097	243.234	149.029	negative	-0.95117	0.904725	8.075e-05	0.0811866	0.09416	0.05791	0.04792	0.30194	0.14138	0.33283	0.34872	0.08785	0.05639	233.548	251.334	274.063	155.486	176.826	137.405	126.399	221.543	235.68
cg23697157	7	137609343	CREB3L2	0.240466	0.628036	0.38757	0.00149686	0.258992	28.3189	18.9575	negative	-0.877019	0.769162	0.00190051	0.270566	0.31576	0.222	0.22202	0.70513	0.64667	0.70647	0.68192	0.24778	0.19477	26.8283	27.141	30.3459	23.8376	19.2709	13.8799	18.8417	29.4236	27.8559
cg01154283	2	36603543	CRIM1	0.14906	0.343796	0.194736	0.00826076	0.421454	398.289	242.324	negative	-0.927461	0.860184	0.00031514	0.1477	0.19781	0.15413	0.14498	0.42626	0.27884	0.39062	0.41925	0.15909	0.08929	397.254	362.098	364.408	188.062	377.864	188.164	215.207	429.111	438.576
cg23336143	2	36635519	CRIM1	0.066992	0.264102	0.19711	0.039232	0.527258	398.289	242.324	negative	-0.890694	0.793336	0.00127558	0.236327	0.08176	0.04933	0.04393	0.35997	0.15086	0.30615	0.43158	0.13259	0.02735	397.254	362.098	364.408	188.062	377.864	188.164	215.207	429.111	438.576
cg01704698	16	84941294	CRISPLD2	0.092802	0.4424	0.349598	0.0205866	0.492555	27.2095	10.9237	negative	-0.904007	0.817229	0.0008206	0.200935	0.13154	0.13613	0.0626	0.45517	0.3057	0.62744	0.66605	0.09168	0.04206	21.7246	21.4813	24.0581	12.5222	16.3797	5.84377	8.949	34.356	34.4277
cg04704487	16	84876665	CRISPLD2	0.438276	0.686728	0.248452	0.0102743	0.438024	27.2095	10.9237	negative	-0.845124	0.714235	0.00412292	0.349994	0.47383	0.43852	0.43717	0.82244	0.7022	0.75061	0.67223	0.39922	0.44264	21.7246	21.4813	24.0581	12.5222	16.3797	5.84377	8.949	34.356	34.4277
cg26709988	16	84860918	CRISPLD2	0.049522	0.508272	0.45875	0.0362795	0.521675	27.2095	10.9237	negative	-0.869797	0.756547	0.00230363	0.285677	0.06523	0.06602	0.04497	0.70114	0.22333	0.84304	0.68648	0.04708	0.02431	21.7246	21.4813	24.0581	12.5222	16.3797	5.84377	8.949	34.356	34.4277
cg00263677	16	84885230	CRISPLD2	0.034152	0.58852	0.554368	0.0297622	0.510028	27.2095	10.9237	negative	-0.879958	0.774327	0.00175144	0.262671	0.0501	0.03034	0.03538	0.5965	0.36725	0.9622	0.9336	0.04529	0.00965	21.7246	21.4813	24.0581	12.5222	16.3797	5.84377	8.949	34.356	34.4277
cg13292607	10	126751950	CTBP2	0.130396	0.623452	0.493056	0.0285441	0.507979	26.9358	18.6918	negative	-0.932716	0.869958	0.00024349	0.134278	0.13175	0.14587	0.13832	0.78149	0.34353	0.90551	0.89046	0.15915	0.07689	26.6393	25.0817	28.5924	21.6731	22.2495	16.1001	14.7446	25.8366	28.529
cg01421615	10	126782592	CTBP2	0.27647	0.594888	0.318418	0.0315356	0.514122	26.9358	18.6918	negative	-0.981724	0.963782	2.669e-06	0.0214429	0.34081	0.34789	0.24517	0.5833	0.46037	0.79391	0.8363	0.24735	0.20113	26.6393	25.0817	28.5924	21.6731	22.2495	16.1001	14.7446	25.8366	28.529
cg02921122	10	126712074	CTBP2	0.402536	0.641948	0.239412	0.00112162	0.239172	26.9358	18.6918	negative	-0.845219	0.714395	0.00411452	0.349994	0.51827	0.38156	0.40715	0.62967	0.61828	0.64527	0.66069	0.37604	0.32966	26.6393	25.0817	28.5924	21.6731	22.2495	16.1001	14.7446	25.8366	28.529
cg20403409	10	126752037	CTBP2	0.202434	0.583752	0.381318	0.0370793	0.523145	26.9358	18.6918	negative	-0.908352	0.825104	0.00070084	0.19255	0.2882	0.21567	0.18067	0.73606	0.30196	0.84367	0.77976	0.18719	0.14044	26.6393	25.0817	28.5924	21.6731	22.2495	16.1001	14.7446	25.8366	28.529
cg14045814	2	219267341	CTDSP1	0.300938	0.454946	0.154008	0.0149449	0.469448	33.5586	27.6941	negative	-0.850759	0.723791	0.0036424	0.337469	0.34824	0.3697	0.25636	0.52374	0.35592	0.36924	0.55646	0.24455	0.28584	32.3967	29.2216	35.1615	24.7451	27.2857	33.8339	24.9115	39.6967	31.3166
cg12386061	3	37906586	CTDSPL	0.385398	0.66136	0.275962	0.0211799	0.493372	15.3692	9.08387	negative	-0.937785	0.87944	0.00018604	0.120461	0.32956	0.35696	0.45258	0.81811	0.43383	0.76498	0.78229	0.49276	0.29513	15.1256	16.0671	16.3326	6.35312	15.3744	9.55105	5.05691	13.4724	15.8482
cg01008405	5	139039026	CXXC5	0.099698	0.38445	0.284752	0.0176773	0.482694	28.8899	10.5866	negative	-0.975946	0.95247	6.942e-06	0.0305253	0.10541	0.10941	0.11206	0.40908	0.28439	0.52503	0.54746	0.10677	0.06484	25.8942	26.4554	29.8759	10.5183	17.0075	6.48021	8.34047	28.482	33.7418
cg13331011	5	139054289	CXXC5	0.451094	0.658202	0.207108	0.0160802	0.475591	28.8899	10.5866	negative	-0.846993	0.717396	0.00395908	0.346099	0.45311	0.49373	0.4003	0.74925	0.45667	0.70917	0.75063	0.39337	0.51496	25.8942	26.4554	29.8759	10.5183	17.0075	6.48021	8.34047	28.482	33.7418
cg14871225	5	139040820	CXXC5	0.046996	0.335736	0.28874	0.00675467	0.400517	28.8899	10.5866	negative	-0.948018	0.898739	0.0001002	0.0892828	0.0512	0.0546	0.053	0.35909	0.38539	0.45879	0.35344	0.05157	0.02461	25.8942	26.4554	29.8759	10.5183	17.0075	6.48021	8.34047	28.482	33.7418
cg24119607	5	139047739	CXXC5	0.093064	0.348546	0.255482	0.0242134	0.501064	28.8899	10.5866	negative	-0.964606	0.930465	2.653e-05	0.0512788	0.08775	0.11001	0.09172	0.48241	0.24672	0.43273	0.46913	0.10896	0.06688	25.8942	26.4554	29.8759	10.5183	17.0075	6.48021	8.34047	28.482	33.7418
cg20455854	5	139040849	CXXC5	0.010716	0.382198	0.371482	0.00858678	0.42507	28.8899	10.5866	negative	-0.95048	0.903413	8.475e-05	0.0822682	0.01193	0.01104	0.00805	0.39583	0.43048	0.55035	0.44333	0.01225	0.01031	25.8942	26.4554	29.8759	10.5183	17.0075	6.48021	8.34047	28.482	33.7418
cg19628988	5	139040928	CXXC5	0.026796	0.28469	0.257894	0.0250407	0.50288	28.8899	10.5866	negative	-0.923771	0.853353	0.00037353	0.1554	0.00843	0.02012	0.05022	0.41022	0.23874	0.47391	0.25108	0.03759	0.01762	25.8942	26.4554	29.8759	10.5183	17.0075	6.48021	8.34047	28.482	33.7418
cg18814344	5	139040546	CXXC5	0.084742	0.348336	0.263594	0.0109169	0.442527	28.8899	10.5866	negative	-0.967424	0.935909	1.99e-05	0.0477877	0.07962	0.09058	0.09745	0.40649	0.33766	0.48752	0.37672	0.08982	0.06624	25.8942	26.4554	29.8759	10.5183	17.0075	6.48021	8.34047	28.482	33.7418
cg18068537	15	74660088	CYP11A1	0.723164	0.469648	-0.253516	0.035263	0.519042	0.260979	6.8015	negative	-0.869321	0.75572	0.0023321	0.286572	0.7027	0.74173	0.70795	0.41957	0.56256	0.27563	0.35253	0.69092	0.77252	0.48117	0.329324	0.231201	1.75207	4.32436	13.7236	7.40598	0.156475	0.106725
cg08033551	15	74659966	CYP11A1	0.824818	0.492346	-0.332472	0.0232003	0.497815	0.260979	6.8015	negative	-0.843652	0.711748	0.00425532	0.351095	0.83945	0.83545	0.81804	0.39891	0.61255	0.27041	0.38491	0.78183	0.84932	0.48117	0.329324	0.231201	1.75207	4.32436	13.7236	7.40598	0.156475	0.106725
cg24849517	15	74661541	CYP11A1	0.777664	0.245798	-0.531866	0.00107265	0.236031	0.260979	6.8015	negative	-0.86276	0.744354	0.00274983	0.307982	0.81837	0.69524	0.75149	0.31008	0.43142	0.07189	0.07457	0.79137	0.83185	0.48117	0.329324	0.231201	1.75207	4.32436	13.7236	7.40598	0.156475	0.106725
cg13752933	9	90114755	DAPK1	0.735906	0.248088	-0.487818	0.00347379	0.337628	0.179965	17.4506	negative	-0.897806	0.806056	0.00101524	0.216843	0.69204	0.73235	0.73203	0.19576	0.21297	0.11612	0.14866	0.74707	0.77604	0.222689	0.099557	0.151526	15.2341	6.09559	26.229	22.2439	0.0677141	0.35834
cg24754277	9	90114156	DAPK1	0.813276	0.372526	-0.44075	0.0377757	0.524128	0.179965	17.4506	negative	-0.974257	0.949177	8.789e-06	0.0348272	0.79779	0.80953	0.82317	0.17024	0.64379	0.10536	0.14598	0.78595	0.84994	0.222689	0.099557	0.151526	15.2341	6.09559	26.229	22.2439	0.0677141	0.35834
cg14014720	9	90113998	DAPK1	0.885106	0.401088	-0.484018	0.0431677	0.535798	0.179965	17.4506	negative	-0.968983	0.938929	1.679e-05	0.0459944	0.82862	0.92482	0.87485	0.15821	0.72292	0.09806	0.14246	0.85693	0.94031	0.222689	0.099557	0.151526	15.2341	6.09559	26.229	22.2439	0.0677141	0.35834
cg13527872	9	90114037	DAPK1	0.90817	0.494822	-0.413348	0.0459162	0.540962	0.179965	17.4506	negative	-0.952657	0.907556	7.257e-05	0.0785747	0.89028	0.90423	0.92348	0.2659	0.72305	0.30401	0.22845	0.85676	0.9661	0.222689	0.099557	0.151526	15.2341	6.09559	26.229	22.2439	0.0677141	0.35834
cg15746719	9	90113813	DAPK1	0.429934	0.116627	-0.313306	0.0234856	0.498465	0.179965	17.4506	negative	-0.95779	0.917362	0.00018211	0.119873	0.44829	0.47704	0.45932	0.05764		0.01377	0.04364	0.33858	0.42644	0.222689	0.099557	0.151526	15.2341	6.09559	26.229	22.2439	0.0677141	0.35834
cg03400695	8	142162582	DENND3	0.19356	0.647426	0.453866	0.0239441	0.500461	8.13688	4.58146	negative	-0.851823	0.725603	0.0035562	0.336808	0.15225	0.31052	0.2004	0.88627	0.48403	0.8675	0.78985	0.14635	0.15828	6.6598	5.61942	8.38119	4.16608	6.8695	3.28578	4.00448	11.1862	8.8378
cg18474072	10	664762	DIP2C	0.222128	0.850814	0.628686	5.322e-06	0.0408354	11.3673	7.85119	negative	-0.890761	0.793455	0.00127295	0.236142	0.22815	0.33203	0.20485	0.85582	0.86144	0.79078	0.8782	0.11873	0.22688	11.1966	10.836	9.96968	6.32613	8.76775	8.04115	8.26972	12.3319	12.5025
cg02700106	10	671406	DIP2C	0.050072	0.371452	0.32138	0.0219874	0.495506	11.3673	7.85119	negative	-0.931544	0.867775	0.00025835	0.136429	0.05394	0.06168	0.0569	0.61183	0.24903	0.45953	0.4343	0.04986	0.02798	11.1966	10.836	9.96968	6.32613	8.76775	8.04115	8.26972	12.3319	12.5025
cg27598761	10	537128	DIP2C	0.15526	0.3992	0.24394	0.042663	0.534374	11.3673	7.85119	negative	-0.847867	0.718878	0.00388395	0.344223	0.16284	0.17576	0.15223	0.50995	0.24102	0.5142	0.57293	0.15123	0.13424	11.1966	10.836	9.96968	6.32613	8.76775	8.04115	8.26972	12.3319	12.5025
cg26782150	10	664719	DIP2C	0.190658	0.445734	0.255076	0.00075151	0.211171	11.3673	7.85119	negative	-0.945543	0.894052	0.00011762	0.0964928	0.23359	0.23732	0.21418	0.52138	0.30472	0.45148	0.48482	0.13325	0.13495	11.1966	10.836	9.96968	6.32613	8.76775	8.04115	8.26972	12.3319	12.5025
cg18503829	10	729956	DIP2C	0.054176	0.418166	0.36399	0.0228475	0.497198	11.3673	7.85119	negative	-0.911375	0.830604	0.00062512	0.183735	0.06987	0.04642	0.06314	0.69812	0.31019	0.37985	0.58079	0.05511	0.03634	11.1966	10.836	9.96968	6.32613	8.76775	8.04115	8.26972	12.3319	12.5025
cg03147470	10	537178	DIP2C	0.108104	0.279154	0.17105	0.0438713	0.537517	11.3673	7.85119	negative	-0.893341	0.798059	0.00117383	0.229458	0.09331	0.15102	0.13394	0.40813	0.16213	0.30084	0.40375	0.08556	0.07669	11.1966	10.836	9.96968	6.32613	8.76775	8.04115	8.26972	12.3319	12.5025
cg03038245	10	630310	DIP2C	0.29019	0.696462	0.406272	0.00832953	0.422169	11.3673	7.85119	negative	-0.923309	0.8525	0.00038134	0.156794	0.29761	0.30871	0.30834	0.89251	0.52053	0.7855	0.81613	0.28275	0.25354	11.1966	10.836	9.96968	6.32613	8.76775	8.04115	8.26972	12.3319	12.5025
cg19579652	10	433089	DIP2C	0.324656	0.613892	0.289236	0.0014976	0.258992	11.3673	7.85119	negative	-0.866397	0.750643	0.00251243	0.297053	0.35675	0.4305	0.31538	0.62981	0.71255	0.67008	0.61988	0.31364	0.20701	11.1966	10.836	9.96968	6.32613	8.76775	8.04115	8.26972	12.3319	12.5025
cg17293868	10	671007	DIP2C	0.063894	0.40564	0.341746	0.0169598	0.479787	11.3673	7.85119	negative	-0.891096	0.794052	0.00125975	0.235079	0.06615	0.0639	0.07503	0.53818	0.28637	0.6136	0.45526	0.06349	0.0509	11.1966	10.836	9.96968	6.32613	8.76775	8.04115	8.26972	12.3319	12.5025
cg25438801	10	671497	DIP2C	0.063692	0.410522	0.34683	0.0402728	0.529264	11.3673	7.85119	negative	-0.858219	0.73654	0.00306738	0.320092	0.06017	0.07788	0.06663	0.63029	0.16226	0.67482	0.4682	0.06904	0.04474	11.1966	10.836	9.96968	6.32613	8.76775	8.04115	8.26972	12.3319	12.5025
cg05450336	10	729916	DIP2C	0.04523	0.291312	0.246082	0.0189477	0.486868	11.3673	7.85119	negative	-0.943329	0.889869	0.00013494	0.104952	0.04529	0.05102	0.05904	0.47229	0.23342	0.36715	0.29779	0.0426	0.0282	11.1966	10.836	9.96968	6.32613	8.76775	8.04115	8.26972	12.3319	12.5025
cg02403283	10	518210	DIP2C	0.72151	0.891862	0.170352	0.00742831	0.410234	11.3673	7.85119	negative	-0.847032	0.717463	0.0039557	0.346099	0.62847	0.8246	0.75543	0.94514	0.85347	0.93009	0.88175	0.63734	0.76171	11.1966	10.836	9.96968	6.32613	8.76775	8.04115	8.26972	12.3319	12.5025
cg02126477	8	12973902	DLC1	0.051156	0.302554	0.251398	0.0391466	0.526931	49.8486	29.0949	negative	-0.860663	0.74074	0.00289351	0.31286	0.05283	0.06651	0.05947	0.30957	0.19994	0.4081	0.5397	0.04035	0.03662	52.7819	44.8024	43.6598	36.5022	27.6708	25.5524	26.654	52.6505	55.3483
cg18792365	8	13132967	DLC1	0.111216	0.436904	0.325688	0.0467973	0.542389	49.8486	29.0949	negative	-0.846318	0.716254	0.00401772	0.347681	0.11674	0.1268	0.14881	0.49886	0.28048	0.7739	0.53198	0.09421	0.06952	52.7819	44.8024	43.6598	36.5022	27.6708	25.5524	26.654	52.6505	55.3483
cg20561213	10	129082166	DOCK1	0.67422	0.854538	0.180318	0.00018049	0.127869	23.7566	18.0256	negative	-0.881699	0.777393	0.0016671	0.25799	0.71394	0.60585	0.65082	0.80305	0.8412	0.87357	0.88972	0.6825	0.71799	22.3915	28.8181	23.9328	18.1182	21.2885	18.6817	14.014	22.5971	21.0436
cg05537607	6	56400181	DST	0.622672	0.8236	0.200928	0.0220583	0.495506	38.7965	28.1797	negative	-0.864263	0.74695	0.00264993	0.303752	0.53218	0.7037	0.68765	0.8389	0.67657	0.9106	0.86793	0.44761	0.74222	43.9605	37.0431	34.0019	28.2018	32.6062	22.8786	29.0321	40.2296	38.7474
cg05457998	6	56581152	DST	0.145052	0.593498	0.448446	0.0235208	0.498539	38.7965	28.1797	negative	-0.890603	0.793173	0.00127921	0.236601	0.15228	0.10454	0.19168	0.73747	0.41296	0.83396	0.80267	0.18856	0.0882	43.9605	37.0431	34.0019	28.2018	32.6062	22.8786	29.0321	40.2296	38.7474
cg09709600	11	65359521	EHBP1L1	0.579988	0.753576	0.173588	0.0185967	0.486516	19.8829	14.1072	negative	-0.854644	0.730416	0.00333448	0.328842	0.69581	0.66363	0.51345	0.75736	0.61319	0.85742	0.78052	0.46726	0.55979	17.4537	18.1997	18.5733	15.0267	19.3116	13.4084	8.6819	24.6088	20.5788
cg24969902	14	100259020	EML1	0.482254	0.741308	0.259054	0.0114487	0.448045	22.0394	7.14585	negative	-0.927655	0.860544	0.00031226	0.147096	0.42891	0.61231	0.52643	0.77695	0.60283	0.88329	0.8529	0.32972	0.5139	18.253	20.2568	22.1304	2.62508	17.1111	4.06812	4.77909	31.404	18.1527
cg21919819	14	100275737	EML1	0.328178	0.480644	0.152466	0.0214162	0.494504	22.0394	7.14585	negative	-0.886276	0.785486	0.00145879	0.246419	0.32261	0.40056	0.339	0.53252	0.38843	0.57555	0.54499	0.30129	0.27743	18.253	20.2568	22.1304	2.62508	17.1111	4.06812	4.77909	31.404	18.1527
cg27059354	14	100346529	EML1	0.301722	0.503268	0.201546	0.0345016	0.518463	22.0394	7.14585	negative	-0.844157	0.712601	0.0042096	0.350854	0.38373	0.39046	0.27099	0.64032	0.37791	0.46166	0.67489	0.24902	0.21441	18.253	20.2568	22.1304	2.62508	17.1111	4.06812	4.77909	31.404	18.1527
cg17249170	10	119305798	EMX2	0.137442	0.478768	0.341326	0.0259261	0.504086	6.56141	2.55521	negative	-0.881888	0.777727	0.00165808	0.256982	0.17529	0.18629	0.11405	0.40504	0.3162	0.72884	0.70248	0.10127	0.11031	5.50669	3.47554	8.29265	2.55472	6.22898	0.503965	0.933164	8.82297	6.70921
cg19925204	10	119307692	EMX2	0.032288	0.552984	0.520696	0.0325538	0.516006	6.56141	2.55521	negative	-0.843756	0.711924	0.00424586	0.351047	0.04131	0.03394	0.03399	0.53665	0.32345	0.93435	0.88433	0.0341	0.0181	5.50669	3.47554	8.29265	2.55472	6.22898	0.503965	0.933164	8.82297	6.70921
cg20038591	10	119306659	EMX2	0.079432	0.500808	0.421376	0.0310859	0.513546	6.56141	2.55521	negative	-0.835974	0.698852	0.00499304	0.368017	0.07806	0.09273	0.09542	0.44311	0.32736	0.82766	0.76157	0.08065	0.0503	5.50669	3.47554	8.29265	2.55472	6.22898	0.503965	0.933164	8.82297	6.70921
cg13630043	10	119307769	EMX2	0.044168	0.46656	0.422392	0.0215562	0.494621	6.56141	2.55521	negative	-0.839544	0.704833	0.00464001	0.359475	0.04997	0.04564	0.05585	0.47747	0.30291	0.7161	0.71205	0.03451	0.03487	5.50669	3.47554	8.29265	2.55472	6.22898	0.503965	0.933164	8.82297	6.70921
cg23087306	10	119294055	EMX2OS	0.138652	0.539504	0.400852	0.0327204	0.516141	3.27984	1.8379	negative	-0.845168	0.714309	0.00411903	0.349994	0.17053	0.15346	0.14102	0.56385	0.26675	0.85688	0.76687	0.1317	0.09655	2.99112	2.18459	3.43968	1.73853	4.13846	0.840578	0.63404	4.51131	3.27251
cg06225767	12	11912232	ETV6	0.845802	0.57513	-0.270672	0.0477582	0.54361	4.11789	6.17833	negative	-0.840372	0.706225	0.0045606	0.356952	0.86161	0.73692	0.84174	0.58481	0.77234	0.43151	0.28976	0.87688	0.91186	3.8059	4.20388	3.69612	6.52874	3.51165	7.9665	6.70645	3.96	4.92356
cg26501369	6	133561814	EYA4	0.765218	0.528418	-0.2368	0.00291825	0.320327	0.0144309	1.08914	negative	-0.855612	0.732072	0.00326065	0.326658	0.74765	0.76838	0.77538	0.37645	0.58421	0.54542	0.55078	0.74308	0.7916	0	0	0.0435505	2.5796	0.17138	1.37568	0.229903	0	0.0286039
cg00134210	10	14644132	FAM107B	0.145172	0.494088	0.348916	0.0430887	0.535567	24.018	10.0992	negative	-0.840708	0.706789	0.00452869	0.356098	0.12424	0.05686	0.16835	0.52657	0.33482	0.70953	0.78082	0.27155	0.10486	21.1068	21.726	32.8039	8.63156	21.2604	5.46268	5.04198	25.0739	19.3793
cg22810403	1	36790444	FAM176B	0.423942	0.685454	0.261512	0.0145544	0.467159	60.9291	27.141	negative	-0.903273	0.815901	0.00084216	0.201778	0.52236	0.54533	0.36485	0.6884	0.67734	0.81015	0.8097	0.32888	0.35829	42.4069	57.6116	61.5414	17.8788	50.6963	17.1494	22.8393	73.3183	69.7675
cg22721579	1	36787932	FAM176B	0.024	0.216994	0.192994	0.0432763	0.535927	60.9291	27.141	negative	-0.89625	0.803264	0.00106869	0.222009	0.04161	0.02933	0.01668	0.42265	0.10909	0.27694	0.2325	0.0204	0.01198	42.4069	57.6116	61.5414	17.8788	50.6963	17.1494	22.8393	73.3183	69.7675
cg05949640	4	2627057	FAM193A	0.519522	0.746674	0.227152	0.00216507	0.292993	7.33609	6.25261	negative	-0.887951	0.788458	0.00138732	0.24224	0.59902	0.58003	0.49929	0.69897	0.86559	0.63239	0.74689	0.44919	0.47008	6.27722	6.92546	7.07408	6.18189	5.49271	6.77957	6.55629	8.41744	7.98626
cg21741010	6	116832611	FAM26E	0.441764	0.165416	-0.276348	0.0001159	0.111169	4.31185	10.8185	negative	-0.92114	0.848498	0.00041954	0.161099	0.41638	0.45996	0.45023	0.2175	0.21419	0.10182	0.09262	0.5268	0.35545	5.40131	5.8039	3.19656	8.9895	6.49069	13.715	14.0789	2.34756	4.80993
cg09635874	13	98952518	FARP1	0.283368	0.7967	0.513332	8.994e-05	0.101858	135.63	44.1412	negative	-0.872833	0.761838	0.00212761	0.279812	0.28374	0.40927	0.22259	0.87414	0.84092	0.85392	0.82624	0.27562	0.22562	129.507	131.674	95.1801	28.7621	77.9019	31.3294	38.5712	173.744	148.046
cg22261669	13	98959799	FARP1	0.218004	0.533836	0.315832	0.0448985	0.539598	135.63	44.1412	negative	-0.901067	0.811923	0.00090927	0.20833	0.27402	0.18378	0.25235	0.65747	0.31094	0.83013	0.62496	0.18161	0.19826	129.507	131.674	95.1801	28.7621	77.9019	31.3294	38.5712	173.744	148.046
cg10672164	13	98859885	FARP1	0.060446	0.437444	0.376998	0.0398831	0.528583	135.63	44.1412	negative	-0.874552	0.764841	0.0020322	0.275795	0.06268	0.0486	0.06949	0.55529	0.26369	0.79938	0.50492	0.11161	0.00985	129.507	131.674	95.1801	28.7621	77.9019	31.3294	38.5712	173.744	148.046
cg09499379	13	98810343	FARP1	0.579736	0.810122	0.230386	0.00510439	0.375331	135.63	44.1412	negative	-0.874424	0.764617	0.00203921	0.276039	0.64075	0.7088	0.54276	0.82648	0.71446	0.90434	0.90412	0.50957	0.4968	129.507	131.674	95.1801	28.7621	77.9019	31.3294	38.5712	173.744	148.046
cg16526732	12	95598159	FGD6	0.798604	0.410786	-0.387818	0.00342265	0.336097	2.06498	4.57742	negative	-0.855299	0.731536	0.00328442	0.327102	0.79388	0.81009	0.78004	0.27862	0.38955	0.47657	0.28454	0.77278	0.83623	2.36101	1.98862	1.70331	5.91068	3.09225	5.13725	4.16952	2.15192	2.12004
cg07737802	12	95537812	FGD6	0.518654	0.268696	-0.249958	0.0431711	0.535802	2.06498	4.57742	negative	-0.851223	0.72458	0.00360469	0.337083	0.54023	0.46374	0.55839	0.21244	0.5371	0.11965	0.07858	0.4933	0.53761	2.36101	1.98862	1.70331	5.91068	3.09225	5.13725	4.16952	2.15192	2.12004
cg03546163	6	35654363	FKBP5	0.886412	0.557174	-0.329238	0.0363429	0.521783	1.65763	12.2131	negative	-0.936811	0.877614	0.00019625	0.123039	0.8575	0.87047	0.89167	0.44061	0.80799	0.3505	0.36242	0.87985	0.93257	0.891136	0.902151	4.14872	17.249	3.59459	16.8679	11.1408	1.15245	1.19368
cg04691908	11	128565168	FLI1	0.433324	0.217422	-0.215902	0.00443697	0.358876	1.70083	7.09973	negative	-0.858558	0.737122	0.00304282	0.319421	0.44453	0.4184	0.41811	0.14673	0.15041	0.35107	0.18683	0.44239	0.44319	2.12028	3.47123	0.639302	11.3148	5.26574	5.06293	6.75546	1.4535	0.819821
cg09347959	15	33360271	FMN1	0.08037	0.400662	0.320292	0.0250072	0.502876	1.7363	0.616057	negative	-0.838024	0.702285	0.00478811	0.361601	0.07917	0.09756	0.09287	0.57982	0.23654	0.41544	0.61966	0.07794	0.05431	1.65393	1.34322	2.4954	0.47079	1.06135	0.381388	0.550699	1.5838	1.60516
cg05115375	15	33360485	FMN1	0.050498	0.293722	0.243224	0.0248761	0.502514	1.7363	0.616057	negative	-0.885791	0.784625	0.00147999	0.248004	0.05006	0.07587	0.06083	0.40636	0.20714	0.41774	0.37853	0.03704	0.02869	1.65393	1.34322	2.4954	0.47079	1.06135	0.381388	0.550699	1.5838	1.60516
cg13619277	15	33307322	FMN1	0.099538	0.383432	0.283894	0.00966976	0.43304	1.7363	0.616057	negative	-0.847375	0.718045	0.00392607	0.345618	0.12007	0.13305	0.11777	0.53163	0.19641	0.43481	0.48077	0.05344	0.07336	1.65393	1.34322	2.4954	0.47079	1.06135	0.381388	0.550699	1.5838	1.60516
cg07753967	20	29611652	FRG1B	0.354358	0.17631	-0.178048	0.00724773	0.408806	5.45551	11.5547	negative	-0.89624	0.803246	0.00106904	0.222009	0.39599	0.22366	0.39044	0.20022	0.12857	0.23162	0.25701	0.4202	0.3415	5.61462	10.4843	4.06722	14.4785	11.0889	12.0893	8.56198	2.31602	4.79538
cg14815891	20	29611903	FRG1B	0.464498	0.125896	-0.338602	0.00330263	0.334532	5.45551	11.5547	negative	-0.959608	0.920847	4.192e-05	0.0642958	0.49154	0.2186	0.49731	0.06336	0.05453	0.19446	0.26678	0.59711	0.51793	5.61462	10.4843	4.06722	14.4785	11.0889	12.0893	8.56198	2.31602	4.79538
cg20811988	20	29611924	FRG1B	0.362112	0.10384	-0.258272	0.00395648	0.348669	5.45551	11.5547	negative	-0.95622	0.914357	5.538e-05	0.0687254	0.39118	0.18216	0.39719	0.07333	0.05918	0.12714	0.17606	0.48285	0.35718	5.61462	10.4843	4.06722	14.4785	11.0889	12.0893	8.56198	2.31602	4.79538
cg11777870	14	52191937	FRMD6	0.423484	0.763948	0.340464	0.00011374	0.110394	117.388	42.1266	negative	-0.902466	0.814444	0.00086631	0.204944	0.4057	0.4903	0.43236	0.82264	0.67247	0.81615	0.82385	0.41752	0.37154	154.89	117.957	104.095	44.5916	50.7359	27.0032	46.1755	106.627	103.373
cg02275040	14	52007174	FRMD6	0.160608	0.587558	0.42695	0.0344892	0.518461	117.388	42.1266	negative	-0.856804	0.734113	0.00317127	0.323484	0.16334	0.25456	0.22315	0.7887	0.39656	0.83881	0.78004	0.05402	0.10797	154.89	117.957	104.095	44.5916	50.7359	27.0032	46.1755	106.627	103.373
cg11208869	5	153667063	GALNT10	0.884724	0.60525	-0.279474	0.0464805	0.542076	24.7528	49.0045	negative	-0.87843	0.771639	0.00182789	0.266963	0.83272	0.90307	0.89158	0.39555	0.79773	0.48901	0.4579	0.87406	0.92219	25.287	13.2197	34.6089	50.7724	29.4876	53.9552	61.8029	18.1042	32.5443
cg07195926	3	128203414	GATA2	0.040154	0.271876	0.231722	0.0338633	0.517526	37.0261	9.0029	negative	-0.873908	0.763715	0.00206762	0.277534	0.0331	0.03954	0.04726	0.45374	0.15227	0.41064	0.2719	0.04789	0.03298	36.0387	20.4939	42.0455	5.07568	27.333	0.77885	2.82407	46.0486	40.504
cg25772723	3	128211126	GATA2	0.064664	0.264068	0.199404	0.0259018	0.504085	37.0261	9.0029	negative	-0.87338	0.762792	0.00209695	0.278851	0.07315	0.06675	0.07123	0.42387	0.17636	0.2788	0.3426	0.06407	0.04812	36.0387	20.4939	42.0455	5.07568	27.333	0.77885	2.82407	46.0486	40.504
cg06796779	3	128204927	GATA2	0.09467	0.474748	0.380078	0.0349672	0.518927	37.0261	9.0029	negative	-0.914358	0.836051	0.00055617	0.176343	0.09327	0.11066	0.1122	0.66342	0.24506	0.62939	0.71682	0.12227	0.03495	36.0387	20.4939	42.0455	5.07568	27.333	0.77885	2.82407	46.0486	40.504
cg00241663	3	128209772	GATA2	0.058248	0.306218	0.24797	0.0297358	0.509958	37.0261	9.0029	negative	-0.906051	0.820929	0.00076261	0.197339	0.07741	0.07285	0.07202	0.32233	0.22872	0.51018	0.40275	0.04782	0.02114	36.0387	20.4939	42.0455	5.07568	27.333	0.77885	2.82407	46.0486	40.504
cg09852607	3	128205200	GATA2	0.060838	0.38997	0.329132	0.0165002	0.477523	37.0261	9.0029	negative	-0.888256	0.788999	0.00137459	0.241895	0.06389	0.07294	0.06962	0.45178	0.29615	0.4449	0.62609	0.06322	0.03452	36.0387	20.4939	42.0455	5.07568	27.333	0.77885	2.82407	46.0486	40.504
cg03839949	3	128210541	GATA2	0.04616	0.201996	0.155836	0.0377777	0.524128	37.0261	9.0029	negative	-0.911746	0.831282	0.00061622	0.182129	0.04258	0.04898	0.05844	0.27443	0.10703	0.26343	0.31184	0.04746	0.03334	36.0387	20.4939	42.0455	5.07568	27.333	0.77885	2.82407	46.0486	40.504
cg06115614	3	128205143	GATA2	0.091324	0.461288	0.369964	0.0130007	0.458803	37.0261	9.0029	negative	-0.910463	0.828942	0.00064733	0.186732	0.09632	0.11213	0.10555	0.59958	0.34594	0.54306	0.64245	0.09059	0.05203	36.0387	20.4939	42.0455	5.07568	27.333	0.77885	2.82407	46.0486	40.504
cg07263393	3	128205274	GATA2	0.027918	0.41784	0.389922	0.0313163	0.513792	37.0261	9.0029	negative	-0.916484	0.839944	0.00051041	0.169809	0.0378	0.02268	0.03064	0.57158	0.17396	0.60331	0.65795	0.02702	0.02145	36.0387	20.4939	42.0455	5.07568	27.333	0.77885	2.82407	46.0486	40.504
cg07841173	3	128210150	GATA2	0.038705	0.338538	0.299833	0.021241	0.493481	37.0261	9.0029	negative	-0.907797	0.824096	0.00182659	0.266963		0.04533	0.04293	0.40357	0.24447	0.48821	0.49131	0.0439	0.02266	36.0387	20.4939	42.0455	5.07568	27.333	0.77885	2.82407	46.0486	40.504
cg22915582	3	128204047	GATA2	0.04963	0.23809	0.18846	0.0217688	0.495506	37.0261	9.0029	negative	-0.881238	0.77658	0.00168915	0.259576	0.06259	0.0468	0.05439	0.3628	0.16161	0.25737	0.32649	0.05263	0.03174	36.0387	20.4939	42.0455	5.07568	27.333	0.77885	2.82407	46.0486	40.504
cg01102073	3	128204813	GATA2	0.009216	0.487608	0.478392	0.0202289	0.490796	37.0261	9.0029	negative	-0.914935	0.837106	0.00054348	0.174349	0.01891	0.00916	0.0108	0.65325	0.30098	0.66908	0.73936	0.00082	0.00639	36.0387	20.4939	42.0455	5.07568	27.333	0.77885	2.82407	46.0486	40.504
cg02815312	3	128202731	GATA2	0.098848	0.410828	0.31198	0.0235614	0.498717	37.0261	9.0029	negative	-0.923601	0.853038	0.0003764	0.15609	0.12019	0.12708	0.10708	0.46873	0.24635	0.52675	0.64372	0.08189	0.058	36.0387	20.4939	42.0455	5.07568	27.333	0.77885	2.82407	46.0486	40.504
cg00412675	8	11577758	GATA4	0.857864	0.509368	-0.348496	0.0389662	0.526509	0.099761	15.5561	negative	-0.978985	0.958411	4.34e-06	0.0257998	0.80521	0.87915	0.87671	0.54392	0.71952	0.24527	0.24059	0.81913	0.90912	0.024127	0.15395	0.188062	15.2928	5.3911	21.1305	20.4099	0	0.132666
cg04880278	8	11597172	GATA4	0.767658	0.5295	-0.238158	0.0156852	0.473582	0.099761	15.5561	negative	-0.978928	0.9583	4.381e-06	0.0257998	0.75642	0.73965	0.73645	0.49918	0.64463	0.3711	0.43472	0.76498	0.84079	0.024127	0.15395	0.188062	15.2928	5.3911	21.1305	20.4099	0	0.132666
cg03579045	8	11579013	GATA4	0.774388	0.395652	-0.378736	0.0217517	0.495506	0.099761	15.5561	negative	-0.966779	0.934662	2.13e-05	0.0477877	0.72429	0.79981	0.75465	0.45234	0.49597	0.17812	0.14372	0.76615	0.82704	0.024127	0.15395	0.188062	15.2928	5.3911	21.1305	20.4099	0	0.132666
cg02360939	18	19757022	GATA6	0.741582	0.410882	-0.3307	0.042702	0.534407	0.261185	33.2127	negative	-0.92021	0.846787	0.00043669	0.16246	0.73815	0.6658	0.67727	0.17995	0.54263	0.20971	0.32864	0.77372	0.85297	0.270226	0.33451	0.160282	33.6151	7.68576	57.0824	34.4674	0.188478	0.352428
cg14439622	18	19752292	GATA6	0.915666	0.419728	-0.495938	0.0254818	0.503594	0.261185	33.2127	negative	-0.96412	0.929528	2.781e-05	0.0527148	0.87374	0.94739	0.90388	0.20697	0.66366	0.12269	0.24971	0.90108	0.95224	0.270226	0.33451	0.160282	33.6151	7.68576	57.0824	34.4674	0.188478	0.352428
cg13427880	18	19757016	GATA6	0.761744	0.457152	-0.304592	0.0450314	0.53966	0.261185	33.2127	negative	-0.913618	0.834699	0.00057275	0.179544	0.72239	0.74518	0.74475	0.20394	0.59265	0.30108	0.39121	0.79002	0.80638	0.270226	0.33451	0.160282	33.6151	7.68576	57.0824	34.4674	0.188478	0.352428
cg27592331	18	19756582	GATA6	0.860686	0.359822	-0.500864	0.0374274	0.523371	0.261185	33.2127	negative	-0.957305	0.916433	5.078e-05	0.0679505	0.84369	0.8557	0.8238	0.1171	0.62335	0.0602	0.1247	0.85896	0.92128	0.270226	0.33451	0.160282	33.6151	7.68576	57.0824	34.4674	0.188478	0.352428
cg12615165	18	19756877	GATA6	0.96921	0.404266	-0.564944	0.00966066	0.43304	0.261185	33.2127	negative	-0.956113	0.914153	5.585e-05	0.0687254	0.96184	0.96576	0.96203	0.26445	0.5604	0.09137	0.3181	0.97409	0.98233	0.270226	0.33451	0.160282	33.6151	7.68576	57.0824	34.4674	0.188478	0.352428
cg24753061	18	19752362	GATA6	0.83009	0.425336	-0.404754	0.0256894	0.503932	0.261185	33.2127	negative	-0.939457	0.88258	0.0001694	0.116142	0.84125	0.80809	0.80309	0.2328	0.60883	0.23967	0.24765	0.83147	0.86655	0.270226	0.33451	0.160282	33.6151	7.68576	57.0824	34.4674	0.188478	0.352428
cg16204205	18	19753432	GATA6	0.900788	0.491988	-0.4088	0.0450654	0.53966	0.261185	33.2127	negative	-0.917352	0.841535	0.00049252	0.168201	0.89667	0.8386	0.9133	0.15649	0.77915	0.30471	0.33696	0.91643	0.93894	0.270226	0.33451	0.160282	33.6151	7.68576	57.0824	34.4674	0.188478	0.352428
cg19177125	18	19752414	GATA6	0.907378	0.40964	-0.497738	0.0212811	0.49376	0.261185	33.2127	negative	-0.92143	0.849034	0.00041426	0.160686	0.88981	0.89585	0.89118	0.13906	0.58662	0.21727	0.24638	0.90549	0.95456	0.270226	0.33451	0.160282	33.6151	7.68576	57.0824	34.4674	0.188478	0.352428
cg03425785	20	62221387	GMEB2	0.248242	0.81656	0.568318	9.672e-05	0.103929	5.62326	4.25769	negative	-0.838339	0.702813	0.00475714	0.361449	0.36526	0.29621	0.1991	0.93632	0.65112	0.95086	0.83431	0.25664	0.124	5.25134	5.18799	5.75192	4.99466	4.63989	3.49412	3.9021	6.22546	5.69959
cg20001791	6	16239799	GMPR	0.553676	0.15893	-0.394746	0.00158422	0.265328	4.46507	17.3932	negative	-0.851872	0.725685	0.00355231	0.336694	0.58157	0.45092	0.56715	0.11981	0.10977	0.0395	0.12365	0.61801	0.55073	4.5535	4.70023	4.46474	17.1373	8.20618	26.5496	17.6797	4.64049	3.9664
cg25318189	7	2800436	GNA12	0.271742	0.496568	0.224826	0.0236967	0.499329	51.8402	40.0873	negative	-0.842071	0.709083	0.00440068	0.353535	0.34644	0.26526	0.26621	0.62665	0.31522	0.64106	0.52543	0.21044	0.27036	49.3428	53.2157	54.8074	38.9708	43.2339	39.1382	39.0062	47.7519	54.0832
cg26671050	13	94207303	GPC6	0.800312	0.560338	-0.239974	0.0264159	0.504731	0.135822	10.7893	negative	-0.864738	0.747771	0.00261888	0.302613	0.77489	0.78414	0.81158	0.63771	0.64059	0.37234	0.41513	0.79585	0.8351	0.0785392	0.0165598	0.0493131	10.5099	1.02905	22.8623	8.75594	0.388492	0.146207
cg07837520	16	19871730	GPRC5B	0.923212	0.671234	-0.251978	0.0346593	0.518654	5.25083	27.3138	negative	-0.925738	0.856991	0.00034154	0.149552	0.90934	0.92151	0.91645	0.48761	0.80546	0.58056	0.56908	0.91971	0.94905	2.42815	8.69366	7.70288	47.7972	11.2452	29.1153	21.0975	2.40408	5.02538
cg13705014	9	139250888	GPSM1	0.456572	0.77203	0.315458	0.0111881	0.445345	28.401	15.893	negative	-0.841693	0.708446	0.00443594	0.353807	0.51128	0.49547	0.44097	0.83053	0.62521	0.95374	0.87968	0.42588	0.40926	23.6185	21.5828	23.5516	12.9663	21.7882	11.9573	16.8602	38.3951	34.8569
cg06049177	8	30583924	GSR	0.718794	0.393194	-0.3256	0.040315	0.529345	13.8037	30.5507	negative	-0.962892	0.927162	3.125e-05	0.0554705	0.6366	0.77879	0.73184	0.44539	0.48231	0.1194	0.18593	0.69239	0.75435	13.4168	11.1918	17.2636	29.1649	20.8596	36.2344	35.9438	14.0778	13.0686
cg22990888	8	30585904	GSR	0.71159	0.457526	-0.254064	0.0367979	0.522806	13.8037	30.5507	negative	-0.966713	0.934534	2.145e-05	0.0477877	0.71557	0.75091	0.68871	0.5049	0.66091	0.26946	0.25389	0.64994	0.75282	13.4168	11.1918	17.2636	29.1649	20.8596	36.2344	35.9438	14.0778	13.0686
cg24974365	4	174448549	HAND2	0.067386	0.385314	0.317928	0.0437738	0.537224	18.2468	4.47799	negative	-0.936431	0.876902	0.00020033	0.124061	0.08511	0.06763	0.07092	0.39895	0.18037	0.60422	0.6445	0.06439	0.04888	18.9102	12.7228	19.4602	5.55503	10.199	0.466275	1.69167	20.6298	19.5108
cg16162058	4	174449827	HAND2	0.087064	0.25223	0.165166	0.0330032	0.516215	18.2468	4.47799	negative	-0.914471	0.836258	0.00055367	0.176095	0.09701	0.10543	0.10091	0.2526	0.20046	0.43417	0.26108	0.09155	0.04042	18.9102	12.7228	19.4602	5.55503	10.199	0.466275	1.69167	20.6298	19.5108
cg08297751	4	174448705	HAND2	0.06757	0.493462	0.425892	0.0309346	0.513259	18.2468	4.47799	negative	-0.956728	0.915328	5.319e-05	0.0679618	0.1092	0.07155	0.06747	0.55721	0.2935	0.78127	0.73759	0.05958	0.03005	18.9102	12.7228	19.4602	5.55503	10.199	0.466275	1.69167	20.6298	19.5108
cg01967399	4	174448084	HAND2	0.129924	0.552994	0.42307	0.0336958	0.51715	18.2468	4.47799	negative	-0.942363	0.888047	0.00014302	0.107214	0.18111	0.10505	0.11108	0.65241	0.31913	0.84492	0.78741	0.11185	0.14053	18.9102	12.7228	19.4602	5.55503	10.199	0.466275	1.69167	20.6298	19.5108
cg10933003	4	174448341	HAND2	0.104062	0.523156	0.419094	0.0314758	0.514122	18.2468	4.47799	negative	-0.932421	0.869409	0.00024717	0.134865	0.24707	0.07871	0.08678	0.58787	0.29649	0.81125	0.77908	0.07037	0.03738	18.9102	12.7228	19.4602	5.55503	10.199	0.466275	1.69167	20.6298	19.5108
cg05155840	4	174448841	HAND2	0.050962	0.23704	0.186078	0.0403518	0.529506	18.2468	4.47799	negative	-0.929139	0.8633	0.00029084	0.142566	0.06403	0.05779	0.05854	0.27197	0.11951	0.42169	0.29614	0.06043	0.01402	18.9102	12.7228	19.4602	5.55503	10.199	0.466275	1.69167	20.6298	19.5108
cg05380808	1	210820877	HHAT	0.319828	0.560002	0.240174	0.022018	0.495506	2.99952	1.71791	negative	-0.869224	0.755551	0.00233793	0.287045	0.4089	0.37648	0.2997	0.58144	0.47136	0.747	0.65235	0.23735	0.27671	2.48129	2.65176	2.35574	2.17861	2.66799	0.656461	1.36859	4.52021	2.98858
cg09636715	7	27217057	HOXA10	0.062216	0.502568	0.440352	0.037074	0.523137	29.9398	4.65056	negative	-0.898749	0.80775	0.00098376	0.213949	0.06226	0.06582	0.06635	0.68316	0.23511	0.87807	0.60682	0.07567	0.04098	29.2929	20.9189	26.6357	3.27419	12.7371	0.277751	2.31321	39.784	33.0673
cg09411999	7	27214383	HOXA10	0.116608	0.285408	0.1688	0.0169018	0.479558	29.9398	4.65056	negative	-0.907288	0.823172	0.00072896	0.195127	0.10889	0.13489	0.14784	0.39425	0.27199	0.36522	0.25017	0.10811	0.08331	29.2929	20.9189	26.6357	3.27419	12.7371	0.277751	2.31321	39.784	33.0673
cg27157482	7	27215606	HOXA10	0.082546	0.331912	0.249366	0.00797154	0.417293	29.9398	4.65056	negative	-0.918452	0.843554	0.00047048	0.165765	0.08466	0.08348	0.08792	0.47059	0.26148	0.39645	0.35109	0.08472	0.07195	29.2929	20.9189	26.6357	3.27419	12.7371	0.277751	2.31321	39.784	33.0673
cg10724867	7	27218867	HOXA10	0.04461	0.466556	0.421946	0.0144984	0.466865	29.9398	4.65056	negative	-0.939697	0.883031	0.0001671	0.114879	0.06	0.05008	0.0496	0.62211	0.37524	0.6825	0.54034	0.04036	0.02301	29.2929	20.9189	26.6357	3.27419	12.7371	0.277751	2.31321	39.784	33.0673
cg02483701	7	27215610	HOXA10	0.058044	0.276898	0.218854	0.0131524	0.459712	29.9398	4.65056	negative	-0.875831	0.76708	0.00196316	0.272613	0.0572	0.06066	0.06738	0.32195	0.26404	0.44555	0.21199	0.0575	0.04748	29.2929	20.9189	26.6357	3.27419	12.7371	0.277751	2.31321	39.784	33.0673
cg15864691	7	27217606	HOXA10	0.050108	0.519224	0.469116	0.0314738	0.514122	29.9398	4.65056	negative	-0.911805	0.831387	0.00061484	0.182129	0.05712	0.05899	0.05208	0.76651	0.23061	0.73476	0.7577	0.05373	0.02862	29.2929	20.9189	26.6357	3.27419	12.7371	0.277751	2.31321	39.784	33.0673
cg14188840	7	27220398	HOXA10	0.055662	0.414248	0.358586	0.0352915	0.519042	29.9398	4.65056	negative	-0.901925	0.813468	0.00088276	0.205978	0.07754	0.05893	0.0671	0.61993	0.20779	0.69439	0.45032	0.04782	0.02692	29.2929	20.9189	26.6357	3.27419	12.7371	0.277751	2.31321	39.784	33.0673
cg05517976	7	27220049	HOXA10	0.062098	0.469788	0.40769	0.0150927	0.470032	29.9398	4.65056	negative	-0.914893	0.83703	0.0005444	0.174472	0.06997	0.05958	0.07384	0.62772	0.3916	0.73068	0.4465	0.06255	0.04455	29.2929	20.9189	26.6357	3.27419	12.7371	0.277751	2.31321	39.784	33.0673
cg01078824	7	27220047	HOXA10	0.155316	0.306514	0.151198	0.009272	0.431019	29.9398	4.65056	negative	-0.909047	0.826366	0.0006829	0.191177	0.17249	0.16782	0.17787	0.37805	0.27257	0.38946	0.29362	0.16453	0.09387	29.2929	20.9189	26.6357	3.27419	12.7371	0.277751	2.31321	39.784	33.0673
cg14935646	7	27215464	HOXA10	0.068072	0.405836	0.337764	0.0101136	0.436926	29.9398	4.65056	negative	-0.931611	0.867899	0.00025749	0.136429	0.07527	0.07026	0.08067	0.51054	0.28485	0.56908	0.48895	0.08804	0.02612	29.2929	20.9189	26.6357	3.27419	12.7371	0.277751	2.31321	39.784	33.0673
cg08938793	7	27211117	HOXA10	0.05065	0.365044	0.314394	0.02001	0.489814	29.9398	4.65056	negative	-0.935669	0.875476	0.0002087	0.127694	0.05098	0.05828	0.05801	0.44238	0.27843	0.56993	0.45014	0.05552	0.03046	29.2929	20.9189	26.6357	3.27419	12.7371	0.277751	2.31321	39.784	33.0673
cg08575233	7	27220983	HOXA11	0.122442	0.559196	0.436754	0.020532	0.492234	25.7212	4.09668	negative	-0.931405	0.867516	0.00026016	0.136819	0.1931	0.13307	0.11573	0.77627	0.42645	0.81941	0.60372	0.11136	0.05895	25.1224	20.841	21.6201	3.37353	11.2467	0	1.76647	34.6688	26.3537
cg26464446	7	27221557	HOXA11	0.057406	0.334616	0.27721	0.0164394	0.477001	25.7212	4.09668	negative	-0.927102	0.859518	0.00032052	0.148456	0.0673	0.05337	0.06208	0.50443	0.24632	0.42224	0.38936	0.05451	0.04977	25.1224	20.841	21.6201	3.37353	11.2467	0	1.76647	34.6688	26.3537
cg16880946	7	27188465	HOXA6	0.104358	0.316662	0.212304	0.023745	0.499558	3.16683	1.07245	negative	-0.92156	0.849273	0.00041193	0.160387	0.21589	0.06559	0.08593	0.39682	0.22892	0.43116	0.4145	0.09719	0.05719	2.60189	3.15099	2.38925	1.43222	2.32205	0	0.535543	3.55998	4.13205
cg21007852	7	27203546	HOXA9	0.100234	0.505132	0.404898	0.0242619	0.501132	15.7078	2.91597	negative	-0.976099	0.952769	6.79e-06	0.0305253	0.16446	0.08227	0.08918	0.62227	0.32021	0.74742	0.69017	0.11363	0.05163	15.7681	12.6703	17.8182	1.20774	9.58569	0	0.870444	15.5018	16.7806
cg03217995	7	27203430	HOXA9	0.066912	0.54123	0.474318	0.0392481	0.527288	15.7078	2.91597	negative	-0.975676	0.951944	7.217e-06	0.0308417	0.10153	0.0615	0.06814	0.79965	0.24488	0.82483	0.75848	0.08129	0.0221	15.7681	12.6703	17.8182	1.20774	9.58569	0	0.870444	15.5018	16.7806
cg00567703	12	54413101	HOXC4	0.697986	0.45757	-0.240416	0.0367581	0.522745	0.117456	3.81386	negative	-0.922298	0.850633	0.00039882	0.158272	0.66545	0.66129	0.64391	0.47034	0.57265	0.23845	0.32625	0.7991	0.72018	1.967e-30	0.451036	0.0574771	4.61202	1.26349	4.70073	4.67922	0.0263661	0.0524015
cg16370398	12	54448913	HOXC4	0.833382	0.50358	-0.329802	0.0430248	0.535297	0.117456	3.81386	negative	-0.888858	0.790068	0.00134967	0.240498	0.74266	0.82921	0.83044	0.32675	0.521	0.54524	0.22991	0.86042	0.90418	1.967e-30	0.451036	0.0574771	4.61202	1.26349	4.70073	4.67922	0.0263661	0.0524015
cg07915976	12	54414427	HOXC4	0.897092	0.705924	-0.191168	0.0302207	0.511075	0.117456	3.81386	negative	-0.976484	0.953521	6.417e-06	0.0300607	0.86826	0.91329	0.89059	0.63453	0.81647	0.62098	0.57903	0.86881	0.94451	1.967e-30	0.451036	0.0574771	4.61202	1.26349	4.70073	4.67922	0.0263661	0.0524015
cg15772924	12	54413384	HOXC4	0.64082	0.27862	-0.3622	0.0202965	0.491148	0.117456	3.81386	negative	-0.957463	0.916736	5.013e-05	0.0679505	0.63954	0.62996	0.57649	0.20019	0.35386	0.09273	0.11131	0.73911	0.619	1.967e-30	0.451036	0.0574771	4.61202	1.26349	4.70073	4.67922	0.0263661	0.0524015
cg15611151	12	54412269	HOXC4	0.451474	0.21387	-0.237604	0.0420715	0.533297	0.117456	3.81386	negative	-0.980341	0.961068	3.441e-06	0.022574	0.52115	0.42284	0.43211	0.11821	0.37651	0.04111	0.08866	0.48011	0.40116	1.967e-30	0.451036	0.0574771	4.61202	1.26349	4.70073	4.67922	0.0263661	0.0524015
cg11938718	2	10526453	HPCAL1	0.125572	0.407194	0.281622	0.0402163	0.529233	43.2922	19.2858	negative	-0.956642	0.915165	5.356e-05	0.0679618	0.07977	0.08071	0.1429	0.39816	0.29541	0.60447	0.62551	0.25911	0.06537	41.3805	39.7235	47.3845	21.6109	30.4264	12.1471	12.9588	39.2275	48.7448
cg10283844	2	10487314	HPCAL1	0.244586	0.692814	0.448228	0.00426467	0.355174	43.2922	19.2858	negative	-0.974002	0.94868	9.095e-06	0.0352854	0.3376	0.17324	0.20458	0.7303	0.59695	0.8895	0.84465	0.35393	0.15358	41.3805	39.7235	47.3845	21.6109	30.4264	12.1471	12.9588	39.2275	48.7448
cg18022012	2	10444757	HPCAL1	0.034602	0.388534	0.353932	0.0461455	0.541283	43.2922	19.2858	negative	-0.962881	0.92714	3.129e-05	0.0554705	0.03614	0.04703	0.03329	0.34175	0.19747	0.70666	0.63553	0.04986	0.00669	41.3805	39.7235	47.3845	21.6109	30.4264	12.1471	12.9588	39.2275	48.7448
cg03476007	4	143768727	INPP4B	0.207918	0.617366	0.409448	0.0103246	0.438335	8.88741	2.55328	negative	-0.838912	0.703773	0.0047012	0.360383	0.30459	0.2817	0.16644	0.64414	0.67498	0.85352	0.65378	0.18493	0.10193	11.6274	4.59277	8.56462	2.69056	4.70462	1.27395	1.54398	10.5143	9.13795
cg16796272	3	197639879	IQCG	0.739366	0.356732	-0.382634	0.0252335	0.503184	3.60017	13.2466	negative	-0.940344	0.884248	0.00016101	0.112975	0.75547	0.73934	0.68383	0.46517	0.42943	0.09322	0.11876	0.73964	0.77855	2.84484	4.21181	3.82997	8.36509	14.5027	16.0126	14.1062	3.29373	3.82049
cg01328500	3	197639792	IQCG	0.712638	0.36723	-0.345408	0.0216769	0.49512	3.60017	13.2466	negative	-0.944861	0.892762	0.00012278	0.099243	0.81443	0.67289	0.63378	0.43194	0.41386	0.09731	0.22179	0.72822	0.71387	2.84484	4.21181	3.82997	8.36509	14.5027	16.0126	14.1062	3.29373	3.82049
cg24935345	5	52190992	ITGA1	0.609572	0.80377	0.194198	0.00967329	0.43304	56.2423	20.6547	negative	-0.927161	0.859627	0.00031963	0.148255	0.72664	0.6508	0.58784	0.85847	0.78764	0.85795	0.87308	0.50326	0.57932	41.4577	39.1437	55.2344	17.1992	30.5893	8.31882	26.5115	69.6609	75.7146
cg26155697	5	52150386	ITGA1	0.389828	0.626424	0.236596	0.0340388	0.517624	56.2423	20.6547	negative	-0.885458	0.784035	0.00149464	0.249193	0.49888	0.42645	0.44967	0.8203	0.50096	0.6613	0.7431	0.29965	0.27449	41.4577	39.1437	55.2344	17.1992	30.5893	8.31882	26.5115	69.6609	75.7146
cg01044293	2	173296469	ITGA6	0.712608	0.903414	0.190806	0.00018272	0.128644	97.6591	18.9374	negative	-0.848552	0.720041	0.00382577	0.342565	0.75517	0.73542	0.6831	0.91808	0.91873	0.9084	0.86542	0.64777	0.74158	114.233	58.4235	71.9688	9.91746	33.486	25.4604	6.88585	145.875	97.7954
cg22377814	7	28091875	JAZF1	0.139356	0.598702	0.459346	0.0156583	0.473502	40.6023	17.8359	negative	-0.874171	0.764175	0.0020531	0.276906	0.14847	0.12594	0.20203	0.7462	0.47792	0.83703	0.73237	0.14955	0.07079	40.4765	57.2775	33.1558	14.315	36.1856	8.78417	12.0588	36.5023	35.5993
cg18177653	7	28152868	JAZF1	0.179264	0.654446	0.475182	0.0248661	0.502514	40.6023	17.8359	negative	-0.882998	0.779686	0.00160601	0.25421	0.33289	0.12284	0.18678	0.86672	0.44156	0.89437	0.86393	0.16063	0.09318	40.4765	57.2775	33.1558	14.315	36.1856	8.78417	12.0588	36.5023	35.5993
cg23597162	7	28102341	JAZF1	0.06627	0.383606	0.317336	0.0341244	0.517624	40.6023	17.8359	negative	-0.856277	0.733211	0.00321056	0.324547	0.08372	0.07903	0.07128	0.48465	0.24916	0.67164	0.42814	0.064	0.03332	40.4765	57.2775	33.1558	14.315	36.1856	8.78417	12.0588	36.5023	35.5993
cg17052756	7	28143676	JAZF1	0.114268	0.47882	0.364552	0.0386969	0.526091	40.6023	17.8359	negative	-0.868345	0.754023	0.00239126	0.290357	0.15101	0.13529	0.11075	0.57812	0.27182	0.79808	0.61283	0.10866	0.06563	40.4765	57.2775	33.1558	14.315	36.1856	8.78417	12.0588	36.5023	35.5993
cg07478501	19	11305231	KANK2	0.14767	0.382006	0.234336	0.0132129	0.459906	69.1589	38.7081	negative	-0.876769	0.768725	0.00191355	0.270954	0.18955	0.15398	0.14992	0.53462	0.23424	0.40473	0.46512	0.12387	0.12103	60.4966	67.3509	63.9923	26.1338	39.193	50.6304	38.8752	78.1367	75.8178
cg08437802	19	11304272	KANK2	0.48775	0.801744	0.313994	0.00024057	0.142362	69.1589	38.7081	negative	-0.907563	0.823671	0.00072162	0.194424	0.53101	0.50277	0.50353	0.8639	0.80338	0.82875	0.82252	0.34137	0.56007	60.4966	67.3509	63.9923	26.1338	39.193	50.6304	38.8752	78.1367	75.8178
cg13516362	19	11308987	KANK2	0.2716	0.628586	0.356986	0.00533064	0.379567	69.1589	38.7081	negative	-0.885076	0.783359	0.00151156	0.250043	0.3317	0.27368	0.28485	0.80408	0.45236	0.71019	0.69788	0.22297	0.2448	60.4966	67.3509	63.9923	26.1338	39.193	50.6304	38.8752	78.1367	75.8178
cg21201109	19	11307090	KANK2	0.144758	0.383898	0.23914	0.0234112	0.498304	69.1589	38.7081	negative	-0.920309	0.846969	0.00043484	0.16239	0.16972	0.17419	0.17131	0.61636	0.27947	0.39161	0.41692	0.09658	0.11199	60.4966	67.3509	63.9923	26.1338	39.193	50.6304	38.8752	78.1367	75.8178
cg23948443	19	11292181	KANK2	0.575056	0.733732	0.158676	0.00996606	0.435978	69.1589	38.7081	negative	-0.857991	0.736148	0.00308397	0.320408	0.69824	0.58439	0.48897	0.77137	0.7867	0.74725	0.75415	0.53783	0.56585	60.4966	67.3509	63.9923	26.1338	39.193	50.6304	38.8752	78.1367	75.8178
cg22550815	19	11276529	KANK2	0.086856	0.290308	0.203452	0.0465976	0.542245	69.1589	38.7081	negative	-0.865257	0.74867	0.00258521	0.301015	0.09928	0.0947	0.11455	0.56008	0.18258	0.29271	0.26105	0.07297	0.05278	60.4966	67.3509	63.9923	26.1338	39.193	50.6304	38.8752	78.1367	75.8178
cg08461425	12	121971790	KDM2B	0.371456	0.608964	0.237508	0.01521	0.470619	7.23395	5.12274	negative	-0.852394	0.726576	0.00351053	0.334791	0.44721	0.4309	0.33503	0.60274	0.80581	0.41703	0.64586	0.31808	0.32606	6.00909	4.9501	8.03351	5.36515	4.00766	6.3127	4.80544	9.23134	7.94573
cg26657404	16	85684821	KIAA0182	0.355592	0.67336	0.317768	0.0330662	0.516215	12.5275	9.29716	negative	-0.873674	0.763307	0.00208056	0.278122	0.32661	0.34795	0.42205	0.75396	0.51188	0.90121	0.83657	0.26949	0.41186	12.1359	12.0345	11.1467	8.80643	10.5598	9.90128	7.92113	14.5583	12.7619
cg05441854	16	85650374	KIAA0182	0.122546	0.532072	0.409526	0.0109316	0.442664	12.5275	9.29716	negative	-0.845206	0.714374	0.00411566	0.349994	0.2164	0.13242	0.11595	0.55775	0.42724	0.75993	0.692	0.09588	0.05208	12.1359	12.0345	11.1467	8.80643	10.5598	9.90128	7.92113	14.5583	12.7619
cg26723054	16	85650522	KIAA0182	0.275704	0.54839	0.272686	0.0138001	0.463111	12.5275	9.29716	negative	-0.847629	0.718475	0.00390431	0.344883	0.35927	0.27777	0.24823	0.58105	0.39937	0.68241	0.70208	0.25583	0.23742	12.1359	12.0345	11.1467	8.80643	10.5598	9.90128	7.92113	14.5583	12.7619
cg13550410	1	36004549	KIAA0319L	0.754484	0.228696	-0.525788	0.0004017	0.169796	10.4824	18.6401	negative	-0.909487	0.827167	0.00067169	0.19043	0.675	0.7836	0.8085	0.23768	0.18082	0.09468	0.16159	0.68988	0.81544	11.1644	13.5486	8.75794	19.9517	18.9225	19.4852	16.2012	9.18724	9.75373
cg15388210	1	36005826	KIAA0319L	0.396816	0.120396	-0.27642	4.714e-05	0.0833612	10.4824	18.6401	negative	-0.967071	0.935226	2.066e-05	0.0477877	0.37731	0.37285	0.4643	0.09382	0.07503	0.07142	0.20149	0.37948	0.39014	11.1644	13.5486	8.75794	19.9517	18.9225	19.4852	16.2012	9.18724	9.75373
cg16516091	4	154465115	KIAA0922	0.893454	0.639084	-0.25437	0.0276337	0.5064	1.15501	8.78986	negative	-0.852643	0.727	0.00349076	0.334311	0.87529	0.87358	0.91226	0.71524	0.64325	0.42004	0.54771	0.87828	0.92786	1.26916	1.19268	0.752533	10.7131	2.28877	13.3056	8.85198	1.30561	1.25506
cg19361800	2	208014177	KLF7	0.853292	0.40511	-0.448182	0.0317348	0.514349	15.0561	24.4886	negative	-0.85436	0.729931	0.00335637	0.329334	0.87143	0.78055	0.86191	0.21268	0.7268	0.16404	0.15777	0.86707	0.8855	11.8957	11.773	14.4664	25.2236	17.5874	30.7962	24.3471	16.5709	20.5747
cg18132405	3	189840304	LEPREL1	0.909286	0.688314	-0.220972	0.00685788	0.402652	17.0289	44.3825	negative	-0.862054	0.743136	0.00279765	0.309083	0.90839	0.90943	0.88789	0.64418	0.70305	0.81975	0.72215	0.90755	0.93317	9.13	12.6927	19.4257	70.2	57.2542	25.2698	24.8059	21.7256	22.1704
cg19191560	11	27492757	LGR4	0.813372	0.34142	-0.471952	0.0164497	0.477021	4.98933	12.3678	negative	-0.857846	0.735899	0.00309456	0.320853	0.8249	0.79819	0.8128	0.11648	0.60554	0.09927	0.23432	0.77402	0.85695	8.28504	5.51365	3.90061	11.8291	8.04513	12.4659	17.1309	3.4019	3.84544
cg03534662	3	45636225	LIMD1	0.147984	0.324884	0.1769	0.012384	0.454245	7.35404	6.00626	negative	-0.877235	0.769542	0.00188924	0.270315	0.13526	0.12501	0.19404	0.32332	0.16551	0.41533	0.38659	0.12066	0.16495	7.55359	7.2187	7.95299	5.63515	7.90414	4.6225	5.86327	7.15682	6.88809
cg16283183	3	45718805	LIMD1	0.085148	0.505142	0.419994	0.0266379	0.504772	7.35404	6.00626	negative	-0.865068	0.748342	0.00259746	0.301572	0.07237	0.09657	0.09451	0.67224	0.32678	0.79145	0.61484	0.10073	0.06156	7.55359	7.2187	7.95299	5.63515	7.90414	4.6225	5.86327	7.15682	6.88809
cg13213009	8	74903761	LY96	0.765706	0.372064	-0.393642	0.0201729	0.490486	5.5757	27.3701	negative	-0.910228	0.828515	0.00065314	0.187336	0.69298	0.71042	0.80164	0.54533	0.45705	0.11243	0.11554	0.77309	0.8504	10.1517	7.14813	4.8813	17.5513	27.7542	40.7898	23.385	3.49451	2.20285
cg23732024	8	74903801	LY96	0.835114	0.40089	-0.434224	0.0241747	0.500874	5.5757	27.3701	negative	-0.908226	0.824875	0.00070413	0.19255	0.71239	0.8575	0.86998	0.54947	0.51913	0.08278	0.12319	0.80252	0.93318	10.1517	7.14813	4.8813	17.5513	27.7542	40.7898	23.385	3.49451	2.20285
cg23048001	7	2026167	MAD1L1	0.698344	0.966398	0.268054	0.0305059	0.511704	14.1302	8.61516	negative	-0.851426	0.724926	0.00358822	0.336921	0.92802	0.86031	0.52138	0.97258	0.95286	0.95979	0.96794	0.60868	0.57333	12.4866	10.0061	14.2367	9.69098	8.48285	8.37511	7.91171	18.7735	15.1482
cg04396112	7	2151007	MAD1L1	0.28593	0.445222	0.159292	0.0177445	0.4829	14.1302	8.61516	negative	-0.898245	0.806845	0.00100049	0.215086	0.31649	0.39016	0.29592	0.50551	0.46136	0.5464	0.39274	0.18337	0.24371	12.4866	10.0061	14.2367	9.69098	8.48285	8.37511	7.91171	18.7735	15.1482
cg05434287	7	2030229	MAD1L1	0.468336	0.738528	0.270192	0.00491653	0.371265	14.1302	8.61516	negative	-0.863942	0.746396	0.00267102	0.304193	0.60314	0.58807	0.37368	0.701	0.71671	0.69994	0.82426	0.4376	0.33919	12.4866	10.0061	14.2367	9.69098	8.48285	8.37511	7.91171	18.7735	15.1482
cg24813613	7	1882135	MAD1L1	0.724152	0.886904	0.162752	0.0041625	0.353623	14.1302	8.61516	negative	-0.873349	0.762738	0.00209869	0.278851	0.73639	0.78522	0.72489	0.91974	0.81255	0.94912	0.89737	0.60423	0.77003	12.4866	10.0061	14.2367	9.69098	8.48285	8.37511	7.91171	18.7735	15.1482
cg21782813	7	2030301	MAD1L1	0.28703	0.43999	0.15296	0.00311074	0.326741	14.1302	8.61516	negative	-0.840375	0.70623	0.00456032	0.356952	0.34358	0.36105	0.27047	0.48347	0.45191	0.36563	0.42133	0.24816	0.21189	12.4866	10.0061	14.2367	9.69098	8.48285	8.37511	7.91171	18.7735	15.1482
cg14181271	4	140877994	MAML3	0.184224	0.404284	0.22006	0.026147	0.504096	4.46635	1.97744	negative	-0.948498	0.899649	9.704e-05	0.0882301	0.25104	0.19536	0.24687	0.50214	0.30371	0.51482	0.51058	0.09061	0.13724	3.60263	5.4166	3.94071	1.09473	3.66448	1.79147	1.35907	5.05749	4.31434
cg12426146	4	140657110	MAML3	0.195638	0.39876	0.203122	0.0232136	0.497815	4.46635	1.97744	negative	-0.925441	0.856442	0.00034623	0.150204	0.2792	0.22415	0.19767	0.49602	0.31291	0.44916	0.52584	0.15329	0.12388	3.60263	5.4166	3.94071	1.09473	3.66448	1.79147	1.35907	5.05749	4.31434
cg04138046	5	112608004	MCC	0.85266	0.402884	-0.449776	0.0442073	0.538191	2.46761	9.09486	negative	-0.852674	0.727052	0.00348833	0.334263	0.83893	0.84515	0.84584	0.21192	0.6627	0.12687	0.13184	0.87516	0.85822	3.26074	3.86669	1.7312	15.4362	3.85927	9.37449	7.70946	1.42855	2.05089
cg08213909	5	112417701	MCC	0.78389	0.573132	-0.210758	0.00530461	0.378749	2.46761	9.09486	negative	-0.939328	0.882337	0.00017064	0.116172	0.74161	0.7795	0.75936	0.51195	0.68937	0.56563	0.64338	0.80841	0.83057	3.26074	3.86669	1.7312	15.4362	3.85927	9.37449	7.70946	1.42855	2.05089
cg27351783	5	112592733	MCC	0.82619	0.34739	-0.4788	0.0192871	0.487421	2.46761	9.09486	negative	-0.842671	0.710094	0.00434511	0.352766	0.83541	0.84988	0.83153	0.18268	0.58977	0.12703	0.11757	0.76026	0.85387	3.26074	3.86669	1.7312	15.4362	3.85927	9.37449	7.70946	1.42855	2.05089
cg11133226	3	127504560	MGLL	0.330664	0.5472	0.216536	0.0376839	0.523937	105.639	40.9452	negative	-0.841426	0.707998	0.00446092	0.353807	0.34546	0.30222	0.35971	0.70459	0.36717	0.69336	0.57758	0.28496	0.36097	87.1517	151.518	130.221	15.352	124.516	11.2937	12.6192	68.9587	90.3451
cg03489020	3	69819855	MITF	0.25059	0.561878	0.311288	0.0331863	0.516682	22.7236	4.67514	negative	-0.879467	0.773462	0.00177577	0.264385	0.18868	0.25399	0.38711	0.67375	0.3358	0.85377	0.61027	0.2174	0.20577	23.6207	15.4699	20.4933	2.41991	12.1594	2.25554	1.86573	30.8344	23.1998
cg18496212	3	69797108	MITF	0.039638	0.501204	0.461566	0.0207557	0.492781	22.7236	4.67514	negative	-0.911139	0.830174	0.00063082	0.184501	0.0725	0.01548	0.04517	0.77995	0.35752	0.67889	0.60356	0.04011	0.02493	23.6207	15.4699	20.4933	2.41991	12.1594	2.25554	1.86573	30.8344	23.1998
cg03157283	11	1975380	MRPL23	0.574452	0.745758	0.171306	0.00294644	0.321211	52.4501	38.5896	negative	-0.854051	0.729402	0.00338031	0.329794	0.53474	0.66277	0.56594	0.70039	0.80745	0.78598	0.78585	0.50985	0.59896	56.5628	44.0019	50.2633	49.6689	43.2922	34.9067	26.4904	61.8087	49.6139
cg21291385	21	35448215	MRPS6	0.066494	0.529162	0.462668	0.0226121	0.496618	109.654	46.4648	negative	-0.876199	0.767724	0.00194363	0.272198	0.06331	0.07505	0.07977	0.66265	0.33585	0.77543	0.74957	0.07135	0.04299	94.8503	95.1157	152.724	42.1823	89.9225	33.6118	20.1428	117.91	87.6684
cg07707891	21	35473313	MRPS6	0.11971	0.308346	0.188636	0.0349023	0.518927	109.654	46.4648	negative	-0.845176	0.714323	0.00411834	0.349994	0.11431	0.18296	0.1292	0.29172	0.21133	0.45453	0.44079	0.09743	0.07465	94.8503	95.1157	152.724	42.1823	89.9225	33.6118	20.1428	117.91	87.6684
cg21289738	17	8383742	MYH10	0.885538	0.601288	-0.28425	0.0244654	0.501899	53.6047	168.364	negative	-0.870501	0.757772	0.00226196	0.285158	0.88089	0.86183	0.90005	0.58652	0.66705	0.35385	0.5464	0.87564	0.90928	41.6554	59.7168	45.9208	57.5649	119.033	296.414	200.444	45.7641	74.9665
cg20142309	17	27507917	MYO18A	0.40506	0.600148	0.195088	0.0002934	0.151561	20.6848	10.0789	negative	-0.879957	0.774324	0.00175152	0.262671	0.3774	0.39302	0.4675	0.57866	0.59464	0.68008	0.54859	0.33973	0.44765	19.574	17.404	18.6017	9.98758	13.4306	8.18812	8.70944	25.7302	22.1143
cg18748374	17	27482619	MYO18A	0.112072	0.358942	0.24687	0.0425627	0.534162	20.6848	10.0789	negative	-0.862296	0.743555	0.00278115	0.308575	0.12627	0.11247	0.12785	0.369	0.1994	0.46032	0.61282	0.11919	0.07458	19.574	17.404	18.6017	9.98758	13.4306	8.18812	8.70944	25.7302	22.1143
cg21383280	4	174458502	NBLA00301	0.170122	0.433232	0.26311	0.0362613	0.521647	2.80008	0.843602	negative	-0.933628	0.87166	0.00023234	0.131654	0.27714	0.12063	0.12422	0.59279	0.2642	0.51521	0.60849	0.23053	0.09809	2.99157	2.94374	2.98411	0.549022	2.59803	0	0.227357	1.89119	3.1898
cg24950233	4	174457944	NBLA00301	0.108338	0.331014	0.222676	0.0401145	0.529105	2.80008	0.843602	negative	-0.91356	0.834591	0.00057408	0.17962	0.18878	0.11137	0.08953	0.45843	0.15809	0.38433	0.50929	0.10818	0.04383	2.99157	2.94374	2.98411	0.549022	2.59803	0	0.227357	1.89119	3.1898
cg07681935	4	174452461	NBLA00301	0.115372	0.517254	0.401882	0.0217402	0.495441	2.80008	0.843602	negative	-0.8834	0.780396	0.00158742	0.252669	0.27352	0.08647	0.08754	0.70033	0.37515	0.61784	0.75546	0.09079	0.03854	2.99157	2.94374	2.98411	0.549022	2.59803	0	0.227357	1.89119	3.1898
cg05828497	4	174457692	NBLA00301	0.285528	0.647748	0.36222	0.0248927	0.502514	2.80008	0.843602	negative	-0.900179	0.810323	0.00093733	0.210379	0.47996	0.29965	0.20095	0.78135	0.38912	0.84533	0.84448	0.23648	0.2106	2.99157	2.94374	2.98411	0.549022	2.59803	0	0.227357	1.89119	3.1898
cg19095920	4	174458819	NBLA00301	0.191788	0.543306	0.351518	0.0168233	0.478902	2.80008	0.843602	negative	-0.929039	0.863113	0.00029225	0.142566	0.2329	0.17768	0.152	0.80119	0.3708	0.65946	0.59663	0.30215	0.09421	2.99157	2.94374	2.98411	0.549022	2.59803	0	0.227357	1.89119	3.1898
cg16919569	4	174452835	NBLA00301	0.106624	0.595968	0.489344	0.0196643	0.488844	2.80008	0.843602	negative	-0.89699	0.804592	0.00104303	0.220211	0.37015	0.02126	0.01675	0.74904	0.40207	0.86602	0.81248	0.11429	0.01067	2.99157	2.94374	2.98411	0.549022	2.59803	0	0.227357	1.89119	3.1898
cg26805882	4	174453287	NBLA00301	0.105514	0.49269	0.387176	0.0289952	0.50878	2.80008	0.843602	negative	-0.912987	0.833546	0.00058716	0.179786	0.23267	0.10419	0.05142	0.71925	0.28052	0.63587	0.69243	0.08421	0.05508	2.99157	2.94374	2.98411	0.549022	2.59803	0	0.227357	1.89119	3.1898
cg10024909	4	174452985	NBLA00301	0.10284	0.445368	0.342528	0.0292981	0.509159	2.80008	0.843602	negative	-0.914272	0.835893	0.00055809	0.176343	0.22701	0.06336	0.06888	0.60822	0.24963	0.55153	0.6792	0.09615	0.0588	2.99157	2.94374	2.98411	0.549022	2.59803	0	0.227357	1.89119	3.1898
cg01747862	4	174457371	NBLA00301	0.14604	0.483496	0.337456	0.0412749	0.5321	2.80008	0.843602	negative	-0.901666	0.813001	0.0008907	0.206776	0.32925	0.1748	0.07838	0.69146	0.20883	0.66547	0.66336	0.10804	0.03973	2.99157	2.94374	2.98411	0.549022	2.59803	0	0.227357	1.89119	3.1898
cg11236429	4	174459412	NBLA00301	0.177926	0.36184	0.183914	0.0222431	0.495506	2.80008	0.843602	negative	-0.84472	0.713552	0.00415899	0.350244	0.26886	0.19524	0.12673	0.50793	0.22784	0.33493	0.4516	0.23224	0.06656	2.99157	2.94374	2.98411	0.549022	2.59803	0	0.227357	1.89119	3.1898
cg22322465	4	174459201	NBLA00301	0.280526	0.507488	0.226962	0.0357084	0.520087	2.80008	0.843602	negative	-0.928161	0.861483	0.00030483	0.145821	0.29315	0.27108	0.25176	0.68632	0.30099	0.51571	0.65085	0.34937	0.23727	2.99157	2.94374	2.98411	0.549022	2.59803	0	0.227357	1.89119	3.1898
cg15234400	4	174453166	NBLA00301	0.090232	0.49477	0.404538	0.0300439	0.510732	2.80008	0.843602	negative	-0.912897	0.833381	0.00058923	0.179786	0.22651	0.05586	0.05187	0.72529	0.27343	0.62275	0.7336	0.07822	0.0387	2.99157	2.94374	2.98411	0.549022	2.59803	0	0.227357	1.89119	3.1898
cg09339763	4	174452612	NBLA00301	0.044442	0.36769	0.323248	0.0245222	0.502089	2.80008	0.843602	negative	-0.846177	0.716016	0.00403005	0.347824	0.06875	0.03243	0.05609	0.53313	0.27403	0.33446	0.60558	0.03911	0.02583	2.99157	2.94374	2.98411	0.549022	2.59803	0	0.227357	1.89119	3.1898
cg21382382	4	174452961	NBLA00301	0.129102	0.436814	0.307712	0.0221101	0.495506	2.80008	0.843602	negative	-0.898691	0.807646	0.00098567	0.213962	0.28675	0.08266	0.0849	0.59192	0.27686	0.53015	0.61286	0.13538	0.05582	2.99157	2.94374	2.98411	0.549022	2.59803	0	0.227357	1.89119	3.1898
cg16328548	2	134282102	NCKAP5	0.20426	0.518854	0.314594	0.0142413	0.465581	13.3381	3.64043	negative	-0.877285	0.769629	0.00188667	0.270315	0.14199	0.22962	0.25018	0.52961	0.37608	0.64906	0.73181	0.25506	0.14445	12.5807	15.9627	9.93075	6.98396	4.71086	0.91234	1.95455	15.2257	12.9908
cg06177306	2	133927261	NCKAP5	0.173468	0.68033	0.506862	0.010822	0.442349	13.3381	3.64043	negative	-0.905601	0.820114	0.00077512	0.19769	0.26757	0.23852	0.13251	0.75869	0.70935	0.87113	0.84258	0.14063	0.08811	12.5807	15.9627	9.93075	6.98396	4.71086	0.91234	1.95455	15.2257	12.9908
cg02976355	9	14312435	NFIB	0.871212	0.680042	-0.19117	0.0407704	0.530616	0.0764655	9.80119	negative	-0.942235	0.887808	0.00014411	0.107214	0.80973	0.85311	0.87013	0.57593	0.79695	0.59795	0.55251	0.87455	0.94854	0.0533627	0.222273	0.0481333	9.35921	2.91083	14.2495	12.6852	0.00976813	0.0487904
cg01989908	19	13120555	NFIX	0.734368	0.53754	-0.196828	0.0413728	0.532167	6.88348	34.4706	negative	-0.916473	0.839923	0.00051065	0.169809	0.71492	0.70479	0.75912	0.58863	0.56145	0.38604	0.39837	0.68697	0.80604	9.37008	7.65625	5.3781	32.3644	13.4603	49.3578	42.6999	4.7189	7.29408
cg17928147	19	13125281	NFIX	0.30645	0.122774	-0.183676	0.00148547	0.258839	6.88348	34.4706	negative	-0.838993	0.70391	0.00469327	0.360194	0.25086	0.31455	0.3874	0.10402	0.13931	0.07879	0.08193	0.23004	0.3494	9.37008	7.65625	5.3781	32.3644	13.4603	49.3578	42.6999	4.7189	7.29408
cg18765906	1	236175393	NID1	0.378104	0.714376	0.336272	0.00172652	0.272319	132.071	74.8796	negative	-0.917378	0.841583	0.00049199	0.168201	0.45705	0.40432	0.30652	0.83001	0.63689	0.80134	0.76852	0.40547	0.31716	87.7977	144.236	142.991	62.2132	111.037	55.934	70.3344	133.868	151.463
cg18367578	11	114166446	NNMT	0.774452	0.4636	-0.310852	0.0024223	0.304348	13.2982	174.5	negative	-0.856761	0.734039	0.00317448	0.323612	0.75086	0.79891	0.79637	0.55746	0.3784	0.55023	0.53445	0.70273	0.82339	23.2715	13.1085	8.17376	108.576	186.977	254.669	147.779	11.1869	10.7502
cg01909856	9	139438290	NOTCH1	0.456614	0.71691	0.260296	0.0426984	0.534398	4.99027	3.09836	negative	-0.860678	0.740766	0.00289246	0.312849	0.49516	0.51927	0.46227	0.84388	0.46916	0.87028	0.87857	0.32474	0.48163	4.778	4.09576	4.93539	3.97994	3.87127	1.92569	2.61653	6.13018	5.01201
cg14217861	9	139426233	NOTCH1	0.609646	0.824386	0.21474	0.00750787	0.411215	4.99027	3.09836	negative	-0.842686	0.710119	0.00434376	0.35275	0.57119	0.57808	0.66375	0.85175	0.72271	0.91436	0.93262	0.53272	0.70249	4.778	4.09576	4.93539	3.97994	3.87127	1.92569	2.61653	6.13018	5.01201
cg18428265	2	101437805	NPAS2	0.883662	0.7065	-0.177162	0.0430186	0.535297	3.30565	5.43777	negative	-0.872228	0.760781	0.00216195	0.281029	0.86605	0.89788	0.90706	0.49666	0.75083	0.86955	0.66412	0.81721	0.93011	3.35789	4.48804	3.08551	7.71753	6.25759	2.94852	4.82743	3.22471	2.37212
cg16666160	9	127269631	NR5A1	0.867292	0.545476	-0.321816	0.0450174	0.53966	0.00267114	10.0423	negative	-0.97607	0.952713	6.818e-06	0.0305253	0.86293	0.87093	0.83861	0.54965	0.71739	0.24365	0.36003	0.84802	0.91597	0	0	0	7.01653	3.63594	13.8433	15.6735	0	0.0133557
cg02185666	2	206549667	NRP2	0.514584	0.219905	-0.294679	0.0447292	0.539127	11.1781	114.65	negative	-0.910362	0.828759	0.00168171	0.259035	0.41266	0.48643	0.54123	0.11138		0.09473	0.1773	0.5121	0.6205	9.53665	5.82239	9.03537	100.331	53.0095	177.584	127.676	14.5468	16.9495
cg07182163	14	79511907	NRXN3	0.067884	0.358586	0.290702	0.0312381	0.513777	14.9491	6.74546	negative	-0.914273	0.835896	0.00055806	0.176343	0.06215	0.07235	0.08152	0.3718	0.22652	0.59352	0.50204	0.08485	0.03855	13.7621	16.7319	10.0678	8.21256	10.8448	3.181	4.74349	15.3354	18.8484
cg14374760	12	5603979	NTF3	0.883686	0.672586	-0.2111	0.0372774	0.523365	1.38919	7.63903	negative	-0.956592	0.915068	5.377e-05	0.0679618	0.83404	0.85801	0.90428	0.72104	0.74517	0.51281	0.51257	0.88201	0.94009	2.99414	0.928426	0.790495	4.81418	3.40072	9.36	12.9812	0.985599	1.24729
cg11647944	12	5603148	NTF3	0.795784	0.609134	-0.18665	0.0476625	0.54332	1.38919	7.63903	negative	-0.929896	0.864706	0.00028033	0.141788	0.77862	0.73449	0.82968	0.57561	0.68832	0.50141	0.45397	0.79285	0.84328	2.99414	0.928426	0.790495	4.81418	3.40072	9.36	12.9812	0.985599	1.24729
cg02554564	12	5603131	NTF3	0.671342	0.40596	-0.265382	0.0310693	0.513546	1.38919	7.63903	negative	-0.9077	0.82392	0.00071797	0.193918	0.58368	0.64577	0.71933	0.40748	0.38398	0.29516	0.22792	0.69202	0.71591	2.99414	0.928426	0.790495	4.81418	3.40072	9.36	12.9812	0.985599	1.24729
cg11196788	11	71737549	NUMA1	0.559306	0.763996	0.20469	0.00139075	0.254898	55.4644	30.8779	negative	-0.868214	0.753796	0.00239928	0.290789	0.57841	0.60202	0.51816	0.72269	0.88824	0.72031	0.77103	0.5191	0.57884	57.5757	45.3241	53.7686	31.5492	33.0954	31.2211	27.6459	62.2582	58.3955
cg16441900	17	750848	NXN	0.129436	0.639514	0.510078	0.0116454	0.449362	56.5423	26.5082	negative	-0.884099	0.781631	0.00155546	0.251231	0.2465	0.11942	0.13042	0.83065	0.34223	0.8786	0.80041	0.10744	0.0434	67.0028	52.3461	49.5533	22.1077	63.6694	13.4155	6.8402	57.4642	56.3449
cg02273477	17	800084	NXN	0.118638	0.391832	0.273194	0.0427546	0.534526	56.5423	26.5082	negative	-0.888147	0.788804	0.00137915	0.242181	0.21692	0.12608	0.08193	0.527	0.20978	0.53058	0.57572	0.1195	0.04876	67.0028	52.3461	49.5533	22.1077	63.6694	13.4155	6.8402	57.4642	56.3449
cg17113147	17	753545	NXN	0.486784	0.777162	0.290378	0.00536412	0.379663	56.5423	26.5082	negative	-0.85536	0.731641	0.00327973	0.327102	0.61217	0.45305	0.43869	0.8453	0.55863	0.89188	0.85606	0.47138	0.45863	67.0028	52.3461	49.5533	22.1077	63.6694	13.4155	6.8402	57.4642	56.3449
cg27345989	17	790735	NXN	0.110082	0.416092	0.30601	0.0450784	0.53966	56.5423	26.5082	negative	-0.915796	0.838683	0.00052492	0.172276	0.17559	0.1	0.07989	0.47296	0.17576	0.68221	0.59246	0.12652	0.06841	67.0028	52.3461	49.5533	22.1077	63.6694	13.4155	6.8402	57.4642	56.3449
cg18229049	17	791217	NXN	0.162108	0.6269	0.464792	0.0131483	0.459712	56.5423	26.5082	negative	-0.851712	0.725413	0.00356518	0.336822	0.30614	0.16861	0.1222	0.76424	0.42534	0.86003	0.80876	0.15078	0.06281	67.0028	52.3461	49.5533	22.1077	63.6694	13.4155	6.8402	57.4642	56.3449
cg06604589	17	800512	NXN	0.081476	0.484228	0.402752	0.0211746	0.493372	56.5423	26.5082	negative	-0.90971	0.827572	0.00066608	0.189526	0.10279	0.08428	0.08436	0.59803	0.2883	0.70301	0.673	0.08178	0.05417	67.0028	52.3461	49.5533	22.1077	63.6694	13.4155	6.8402	57.4642	56.3449
cg14827391	17	751287	NXN	0.134672	0.641082	0.50641	0.00530886	0.378769	56.5423	26.5082	negative	-0.844968	0.713971	0.00413687	0.349994	0.19638	0.1201	0.13481	0.83624	0.39456	0.86305	0.65773	0.14559	0.07648	67.0028	52.3461	49.5533	22.1077	63.6694	13.4155	6.8402	57.4642	56.3449
cg09651648	17	854018	NXN	0.324218	0.673912	0.349694	0.0202943	0.491148	56.5423	26.5082	negative	-0.869016	0.755188	0.00235051	0.288054	0.41094	0.33465	0.30891	0.82892	0.51244	0.83191	0.8222	0.30637	0.26022	67.0028	52.3461	49.5533	22.1077	63.6694	13.4155	6.8402	57.4642	56.3449
cg06097704	17	820939	NXN	0.099248	0.694164	0.594916	0.00806989	0.418848	56.5423	26.5082	negative	-0.887328	0.787351	0.00141362	0.243481	0.15123	0.1257	0.08637	0.85273	0.42119	0.95258	0.87664	0.08331	0.04963	67.0028	52.3461	49.5533	22.1077	63.6694	13.4155	6.8402	57.4642	56.3449
cg20764358	17	800100	NXN	0.092932	0.540468	0.447536	0.0378071	0.524129	56.5423	26.5082	negative	-0.910146	0.828366	0.00065517	0.187554	0.1914	0.10926	0.03639	0.73421	0.22866	0.82468	0.78204	0.10299	0.02462	67.0028	52.3461	49.5533	22.1077	63.6694	13.4155	6.8402	57.4642	56.3449
cg22173510	17	753400	NXN	0.308	0.613918	0.305918	0.019603	0.488622	56.5423	26.5082	negative	-0.844153	0.712595	0.00420992	0.350854	0.39447	0.32675	0.26382	0.78881	0.40662	0.79938	0.64384	0.2985	0.25646	67.0028	52.3461	49.5533	22.1077	63.6694	13.4155	6.8402	57.4642	56.3449
cg14235846	17	800745	NXN	0.146358	0.772556	0.626198	0.00517042	0.377041	56.5423	26.5082	negative	-0.90513	0.81926	0.00078838	0.199077	0.15886	0.16426	0.15691	0.94023	0.4417	0.9768	0.96213	0.1767	0.07506	67.0028	52.3461	49.5533	22.1077	63.6694	13.4155	6.8402	57.4642	56.3449
cg08190450	17	800717	NXN	0.177394	0.59851	0.421116	0.0288668	0.508537	56.5423	26.5082	negative	-0.936749	0.877498	0.00019691	0.123219	0.18156	0.2174	0.1901	0.76011	0.29859	0.87731	0.7712	0.16549	0.13242	67.0028	52.3461	49.5533	22.1077	63.6694	13.4155	6.8402	57.4642	56.3449
cg14008999	17	750766	NXN	0.128284	0.61245	0.484166	0.0187878	0.486632	56.5423	26.5082	negative	-0.880472	0.775231	0.00172624	0.261461	0.2224	0.09352	0.13314	0.73782	0.4046	0.87078	0.83597	0.11482	0.07754	67.0028	52.3461	49.5533	22.1077	63.6694	13.4155	6.8402	57.4642	56.3449
cg05322931	17	840950	NXN	0.134332	0.588754	0.454422	0.0169575	0.479787	56.5423	26.5082	negative	-0.900336	0.810606	0.00093232	0.210379	0.11917	0.14133	0.16624	0.75168	0.39257	0.81654	0.74939	0.14022	0.1047	67.0028	52.3461	49.5533	22.1077	63.6694	13.4155	6.8402	57.4642	56.3449
cg23749637	17	800749	NXN	0.370134	0.777856	0.407722	0.00650557	0.396258	56.5423	26.5082	negative	-0.909226	0.826692	0.00067832	0.191031	0.38875	0.38515	0.36543	0.86873	0.56438	0.92368	0.92673	0.33254	0.3788	67.0028	52.3461	49.5533	22.1077	63.6694	13.4155	6.8402	57.4642	56.3449
cg02194714	17	862212	NXN	0.172576	0.659982	0.487406	0.03837	0.525095	56.5423	26.5082	negative	-0.888543	0.789509	0.00136266	0.241258	0.33629	0.19918	0.14089	0.92516	0.32744	0.94758	0.90173	0.12307	0.06345	67.0028	52.3461	49.5533	22.1077	63.6694	13.4155	6.8402	57.4642	56.3449
cg08031967	17	853971	NXN	0.063964	0.369848	0.305884	0.0297849	0.510064	56.5423	26.5082	negative	-0.846074	0.715841	0.00403908	0.347966	0.06979	0.06973	0.07387	0.51895	0.24823	0.31715	0.63898	0.05983	0.0466	67.0028	52.3461	49.5533	22.1077	63.6694	13.4155	6.8402	57.4642	56.3449
cg16885779	17	840975	NXN	0.159778	0.596386	0.436608	0.0194834	0.487708	56.5423	26.5082	negative	-0.907805	0.824109	0.00071521	0.193647	0.12554	0.14611	0.19777	0.76416	0.37915	0.85028	0.72858	0.16202	0.16745	67.0028	52.3461	49.5533	22.1077	63.6694	13.4155	6.8402	57.4642	56.3449
cg14136893	17	872770	NXN	0.050524	0.561306	0.510782	0.0180526	0.484292	56.5423	26.5082	negative	-0.868225	0.753815	0.00239861	0.290789	0.06107	0.05216	0.0688	0.57109	0.406	0.9061	0.76827	0.0521	0.01849	67.0028	52.3461	49.5533	22.1077	63.6694	13.4155	6.8402	57.4642	56.3449
cg19669385	17	800263	NXN	0.023528	0.614242	0.590714	0.0352137	0.519042	56.5423	26.5082	negative	-0.929693	0.864329	0.00028312	0.14211	0.04558	0.02845	0.03119	0.86808	0.25519	0.95585	0.92949	0.01242	0	67.0028	52.3461	49.5533	22.1077	63.6694	13.4155	6.8402	57.4642	56.3449
cg19956147	17	800431	NXN	0.165704	0.536574	0.37087	0.0342368	0.517954	56.5423	26.5082	negative	-0.913078	0.833712	0.00058506	0.179786	0.21967	0.19874	0.15119	0.69645	0.25328	0.81905	0.66068	0.14625	0.11267	67.0028	52.3461	49.5533	22.1077	63.6694	13.4155	6.8402	57.4642	56.3449
cg15019011	17	872762	NXN	0.067916	0.478022	0.410106	0.0198706	0.489377	56.5423	26.5082	negative	-0.888452	0.789347	0.00136645	0.241314	0.07088	0.07363	0.07689	0.47423	0.33151	0.73173	0.6987	0.07502	0.04316	67.0028	52.3461	49.5533	22.1077	63.6694	13.4155	6.8402	57.4642	56.3449
cg15964132	11	3175636	OSBPL5	0.223964	0.64976	0.425796	0.037876	0.524245	14.8451	7.72389	negative	-0.959165	0.919997	4.353e-05	0.0648745	0.46483	0.15483	0.15534	0.82476	0.43256	0.94165	0.85276	0.2732	0.07162	11.6519	15.0752	13.5519	6.71608	11.9913	5.56014	6.62805	16.9198	17.0266
cg16129132	11	3182119	OSBPL5	0.181592	0.356128	0.174536	0.0302076	0.511075	14.8451	7.72389	negative	-0.985257	0.970732	1.263e-06	0.0195962	0.2545	0.22749	0.19899	0.43515	0.27638	0.45113	0.43939	0.12199	0.10499	11.6519	15.0752	13.5519	6.71608	11.9913	5.56014	6.62805	16.9198	17.0266
cg08731067	11	3164631	OSBPL5	0.497376	0.82151	0.324134	1.122e-05	0.0539659	14.8451	7.72389	negative	-0.859279	0.738361	0.00299109	0.316459	0.55603	0.55364	0.47466	0.83319	0.85929	0.87415	0.793	0.43458	0.46797	11.6519	15.0752	13.5519	6.71608	11.9913	5.56014	6.62805	16.9198	17.0266
cg10495980	11	3164728	OSBPL5	0.363778	0.682528	0.31875	0.00015899	0.121992	14.8451	7.72389	negative	-0.853111	0.727799	0.00345372	0.333173	0.40913	0.40518	0.36338	0.73315	0.73131	0.74781	0.63483	0.2903	0.3509	11.6519	15.0752	13.5519	6.71608	11.9913	5.56014	6.62805	16.9198	17.0266
cg26073542	11	3174128	OSBPL5	0.298216	0.60245	0.304234	0.0486882	0.545281	14.8451	7.72389	negative	-0.946022	0.894957	0.0001141	0.0947811	0.37206	0.2921	0.28654	0.73592	0.43624	0.89205	0.67254	0.31929	0.22109	11.6519	15.0752	13.5519	6.71608	11.9913	5.56014	6.62805	16.9198	17.0266
cg06005892	11	3177622	OSBPL5	0.11707	0.589658	0.472588	0.0313419	0.513925	14.8451	7.72389	negative	-0.954099	0.910305	6.522e-05	0.0746889	0.19954	0.14798	0.07569	0.80615	0.33496	0.88679	0.77528	0.08806	0.07408	11.6519	15.0752	13.5519	6.71608	11.9913	5.56014	6.62805	16.9198	17.0266
cg18591228	11	3175552	OSBPL5	0.227856	0.587374	0.359518	0.0287437	0.508094	14.8451	7.72389	negative	-0.957846	0.917469	4.859e-05	0.0677429	0.30695	0.21789	0.2199	0.76181	0.38816	0.83247	0.68444	0.24013	0.15441	11.6519	15.0752	13.5519	6.71608	11.9913	5.56014	6.62805	16.9198	17.0266
cg14991004	11	3168788	OSBPL5	0.29939	0.687896	0.388506	0.0152309	0.471007	14.8451	7.72389	negative	-0.930126	0.865135	0.00027718	0.14128	0.31187	0.40401	0.2621	0.80946	0.5419	0.90447	0.81204	0.26664	0.25233	11.6519	15.0752	13.5519	6.71608	11.9913	5.56014	6.62805	16.9198	17.0266
cg06131936	11	3187271	OSBPL5	0.202978	0.426858	0.223881	0.00947745	0.43188	14.8451	7.72389	negative	-0.94853	0.899709	0.00032786	0.149011	0.2588		0.24048	0.56257	0.35076	0.46644	0.4869	0.18975	0.12288	11.6519	15.0752	13.5519	6.71608	11.9913	5.56014	6.62805	16.9198	17.0266
cg25627263	11	3177729	OSBPL5	0.23325	0.650568	0.417318	0.0269597	0.505561	14.8451	7.72389	negative	-0.967957	0.936941	1.879e-05	0.0474643	0.37197	0.2231	0.20076	0.81395	0.51232	0.86859	0.84022	0.1878	0.18262	11.6519	15.0752	13.5519	6.71608	11.9913	5.56014	6.62805	16.9198	17.0266
cg24931954	11	3164851	OSBPL5	0.60053	0.864784	0.264254	0.00253687	0.307539	14.8451	7.72389	negative	-0.847042	0.71748	0.0039548	0.346099	0.68295	0.70205	0.53515	0.85266	0.85789	0.86696	0.88143	0.49829	0.58421	11.6519	15.0752	13.5519	6.71608	11.9913	5.56014	6.62805	16.9198	17.0266
cg09607488	8	99963657	OSR2	0.06602	0.570114	0.504094	0.0184441	0.486183	18.4651	3.91962	negative	-0.864431	0.74724	0.00263893	0.303229	0.07824	0.07199	0.06353	0.8633	0.31297	0.71032	0.7639	0.08135	0.03499	27.9246	20.7841	14.4647	1.63184	9.27501	3.29561	1.47602	13.4455	15.7066
cg05754861	8	99961768	OSR2	0.206198	0.631088	0.42489	0.0198544	0.489377	18.4651	3.91962	negative	-0.838769	0.703534	0.00471506	0.360614	0.24223	0.24726	0.22302	0.83235	0.45594	0.81522	0.78915	0.18731	0.13117	27.9246	20.7841	14.4647	1.63184	9.27501	3.29561	1.47602	13.4455	15.7066
cg08202494	8	99961545	OSR2	0.04969	0.536304	0.486614	0.0194103	0.487421	18.4651	3.91962	negative	-0.858416	0.736877	0.00305313	0.319718	0.06043	0.07323	0.03758	0.73905	0.30409	0.78087	0.70735	0.05618	0.02103	27.9246	20.7841	14.4647	1.63184	9.27501	3.29561	1.47602	13.4455	15.7066
cg08115114	8	99955989	OSR2	0.078906	0.36213	0.283224	0.0270506	0.505579	18.4651	3.91962	negative	-0.872203	0.760738	0.00216336	0.281035	0.05618	0.08282	0.098	0.59129	0.22224	0.42132	0.45031	0.06313	0.0944	27.9246	20.7841	14.4647	1.63184	9.27501	3.29561	1.47602	13.4455	15.7066
cg20823772	8	99962013	OSR2	0.102342	0.518148	0.415806	0.0216948	0.495199	18.4651	3.91962	negative	-0.850408	0.723194	0.00367114	0.337871	0.121	0.14243	0.09689	0.73221	0.3224	0.66062	0.70756	0.08703	0.06436	27.9246	20.7841	14.4647	1.63184	9.27501	3.29561	1.47602	13.4455	15.7066
cg14548272	8	99961122	OSR2	0.056368	0.464148	0.40778	0.0231722	0.497815	18.4651	3.91962	negative	-0.865408	0.748931	0.00257552	0.300445	0.05618	0.07591	0.05348	0.71376	0.26513	0.60276	0.61566	0.05413	0.04214	27.9246	20.7841	14.4647	1.63184	9.27501	3.29561	1.47602	13.4455	15.7066
cg00388812	8	99961376	OSR2	0.11787	0.523094	0.405224	0.00668059	0.399282	18.4651	3.91962	negative	-0.839923	0.70547	0.00460357	0.358651	0.13651	0.12134	0.10884	0.6381	0.41039	0.74189	0.53081	0.13414	0.08852	27.9246	20.7841	14.4647	1.63184	9.27501	3.29561	1.47602	13.4455	15.7066
cg01581084	8	99961874	OSR2	0.052704	0.632138	0.579434	0.0145141	0.466865	18.4651	3.91962	negative	-0.868133	0.753656	0.00240423	0.290957	0.06714	0.0637	0.05338	0.88988	0.36997	0.83613	0.84795	0.05771	0.02159	27.9246	20.7841	14.4647	1.63184	9.27501	3.29561	1.47602	13.4455	15.7066
cg23193497	6	166051206	PDE10A	0.431766	0.193294	-0.238472	0.0198352	0.489377	0.0662534	3.13922	negative	-0.896493	0.803699	0.00106023	0.22164	0.43394	0.41731	0.44471	0.09806	0.34764	0.08662	0.08318	0.42208	0.44079	0.106892	0.0614772	0.0997079	6.12383	0.238979	2.87671	3.31737	0	0.0631901
cg10706013	21	44104950	PDE9A	0.10538	0.381362	0.275982	0.0442003	0.538191	3.63317	0.763516	negative	-0.904629	0.818353	0.00080265	0.199852	0.08703	0.09035	0.17014	0.32837	0.26449	0.55392	0.64322	0.11181	0.06757	3.66423	3.91203	3.30918	0.37478	2.51867	0	0.160612	4.33216	2.94824
cg18389639	10	97049610	PDLIM1	0.116562	0.283574	0.167012	0.0479893	0.544146	170.026	106.764	negative	-0.922478	0.850966	0.00039566	0.157226	0.13678	0.12638	0.12527	0.28766	0.19504	0.43718	0.38638	0.12207	0.07231	152.958	175.194	141.061	139.703	150.18	40.4925	96.6787	174.455	206.461
cg06122613	1	151297900	PI4KB	0.07131	0.387222	0.315912	0.0467876	0.542389	37.9085	23.0641	negative	-0.932121	0.868849	0.00025096	0.135029	0.06882	0.03365	0.05887	0.44531	0.20344	0.62489	0.60772	0.16333	0.03188	38.2285	34.0663	40.7302	24.8867	30.3135	17.0016	20.0544	40.2211	36.2966
cg12083852	1	151282686	PI4KB	0.250282	0.404696	0.154414	0.0131638	0.459712	37.9085	23.0641	negative	-0.927033	0.85939	0.00032156	0.148676	0.25537	0.27798	0.26775	0.39991	0.31818	0.44725	0.52556	0.23412	0.21619	38.2285	34.0663	40.7302	24.8867	30.3135	17.0016	20.0544	40.2211	36.2966
cg25091228	5	67586433	PIK3R1	0.269914	0.66603	0.396116	0.0177958	0.482986	13.3904	7.22088	negative	-0.884391	0.782148	0.00154224	0.2503	0.48109	0.27356	0.18123	0.78938	0.55847	0.83707	0.85627	0.30646	0.10723	9.70701	9.87783	16.1544	7.8944	7.83941	5.65428	7.49545	12.7357	18.4772
cg09547756	19	3671903	PIP5K1C	0.0439025	0.283788	0.239886	0.0260135	0.504096	37.8061	25.925	negative	-0.895311	0.801581	0.00264794	0.30363		0.04381	0.05281	0.43578	0.13574	0.41948	0.32284	0.04469	0.0343	26.7786	35.3035	36.6617	16.8365	34.1435	21.6699	31.0503	40.9446	49.3422
cg10631684	12	113795897	PLBD2	0.772522	0.441364	-0.331158	0.0389819	0.526555	27.3587	45.6125	negative	-0.892277	0.796159	0.00121403	0.232269	0.7495	0.75132	0.79491	0.45493	0.7118	0.19099	0.18597	0.68092	0.88596	22.9134	34.3209	21.2811	34.1981	35.2036	53.0664	59.9817	28.5341	29.7438
cg24159436	3	16974681	PLCL2	0.919098	0.551306	-0.367792	0.0402276	0.529233	0.778861	1.70258	negative	-0.88819	0.788882	0.00137733	0.241991	0.90482	0.9179	0.92207	0.56265	0.72472	0.2201	0.34668	0.87988	0.97082	1.12409	0.617922	1.0053	1.99334	0.669483	2.40666	1.74083	0.672386	0.474606
cg08844900	3	129326790	PLXND1	0.586224	0.75722	0.170996	8.148e-05	0.0988909	21.4525	8.37048	negative	-0.850462	0.723286	0.00366671	0.337769	0.59061	0.62384	0.576	0.76075	0.76639	0.74662	0.77035	0.53839	0.60228	16.9083	16.8556	15.9556	7.28396	9.45129	5.70515	11.0415	32.5108	25.0324
cg04075024	11	67167826	PPP1CA	0.292474	0.493058	0.200584	0.041923	0.532929	90.1068	63.49	negative	-0.844464	0.71312	0.00418194	0.350854	0.41007	0.36101	0.24657	0.50171	0.39595	0.66046	0.61466	0.26816	0.17656	85.2647	70.7134	100.032	83.3917	65.3999	53.0207	52.1478	101.284	93.2399
cg27049076	11	67166521	PPP1CA	0.382004	0.62626	0.244256	0.0157106	0.473708	90.1068	63.49	negative	-0.927385	0.860043	0.00090586	0.208279	0.36402	0.45615	0.3955		0.54338	0.67721	0.75953	0.31957	0.37478	85.2647	70.7134	100.032	83.3917	65.3999	53.0207	52.1478	101.284	93.2399
cg19325477	17	64688496	PRKCA	0.4177	0.797992	0.380292	0.00225998	0.297359	44.9788	21.6373	negative	-0.887474	0.787611	0.00140741	0.243259	0.44085	0.43306	0.49018	0.8657	0.7585	0.89883	0.9008	0.3702	0.35421	54.642	32.8296	38.8262	17.8636	22.2413	21.8177	24.6267	50.9193	47.6769
cg22118112	20	62657367	PRPF6	0.62122	0.942576	0.321356	0.00774717	0.414607	30.3662	24.1619	negative	-0.939358	0.882393	0.00017036	0.116172	0.6468	0.84881	0.5965	0.96064	0.92501	0.95994	0.97546	0.42854	0.58545	30.9451	24.6182	30.9417	27.0611	24.827	23.1586	21.601	34.0869	31.2392
cg11954332	1	170639289	PRRX1	0.082754	0.65632	0.573566	0.013234	0.459979	30.4657	12.2483	negative	-0.84646	0.716495	0.00400532	0.347325	0.07503	0.11442	0.08489	0.81104	0.66221	0.81449	0.86286	0.0684	0.07103	39.63	28.2129	35.9894	11.8912	14.6281	10.0792	12.3947	30.8274	17.669
cg07305933	8	129079496	PVT1	0.72353	0.409712	-0.313818	0.00637221	0.394897	2.69597	4.40108	negative	-0.898843	0.807919	0.00098066	0.213891	0.74178	0.66684	0.6909	0.30444	0.57781	0.37271	0.25133	0.73996	0.77817	3.22713	2.75579	2.4701	4.13444	3.55875	5.05806	4.85307	2.2518	2.77505
cg11686792	13	114876061	RASA3	0.663742	0.834276	0.170534	0.00072775	0.210131	24.464	14.2855	negative	-0.908725	0.82578	0.00069118	0.191868	0.67568	0.72095	0.65764	0.84187	0.85335	0.84941	0.84131	0.57734	0.6871	24.9384	20.9557	24.0747	15.7793	19.0314	9.252	13.0794	29.3025	23.0488
cg11182893	13	114842103	RASA3	0.699788	0.899218	0.19943	0.00831722	0.421986	24.464	14.2855	negative	-0.920705	0.847697	0.0004275	0.162037	0.76841	0.72482	0.65349	0.89765	0.81341	0.96437	0.94358	0.54661	0.80561	24.9384	20.9557	24.0747	15.7793	19.0314	9.252	13.0794	29.3025	23.0488
cg09020213	13	114810096	RASA3	0.096306	0.53462	0.438314	0.0312223	0.513737	24.464	14.2855	negative	-0.929009	0.863058	0.00029267	0.142566	0.13729	0.10964	0.10027	0.64591	0.27837	0.86242	0.72916	0.07481	0.05952	24.9384	20.9557	24.0747	15.7793	19.0314	9.252	13.0794	29.3025	23.0488
cg08474856	13	114842204	RASA3	0.307476	0.70416	0.396684	0.0119333	0.451532	24.464	14.2855	negative	-0.896669	0.804015	0.00105412	0.22128	0.44714	0.33309	0.26872	0.86985	0.46746	0.88495	0.83444	0.23658	0.25185	24.9384	20.9557	24.0747	15.7793	19.0314	9.252	13.0794	29.3025	23.0488
cg12938556	13	114812918	RASA3	0.234698	0.508488	0.27379	0.0159297	0.474551	24.464	14.2855	negative	-0.848871	0.720583	0.00379886	0.341859	0.3599	0.33085	0.17463	0.53564	0.37187	0.60911	0.70469	0.20894	0.09917	24.9384	20.9557	24.0747	15.7793	19.0314	9.252	13.0794	29.3025	23.0488
cg04349855	13	114842706	RASA3	0.431978	0.781154	0.349176	0.00108384	0.236462	24.464	14.2855	negative	-0.868844	0.75489	0.00236091	0.288682	0.58876	0.50833	0.33189	0.78477	0.75371	0.90786	0.84221	0.39402	0.33689	24.9384	20.9557	24.0747	15.7793	19.0314	9.252	13.0794	29.3025	23.0488
cg00732810	13	114875282	RASA3	0.177688	0.472622	0.294934	0.0105317	0.440051	24.464	14.2855	negative	-0.86913	0.755387	0.00234363	0.287531	0.21706	0.23744	0.1652	0.6368	0.28452	0.61181	0.47914	0.16594	0.1028	24.9384	20.9557	24.0747	15.7793	19.0314	9.252	13.0794	29.3025	23.0488
cg10626896	13	114810794	RASA3	0.163016	0.640882	0.477866	0.0110486	0.443575	24.464	14.2855	negative	-0.917555	0.841907	0.0004884	0.168201	0.20513	0.19993	0.14854	0.77897	0.4177	0.87365	0.79534	0.15639	0.10509	24.9384	20.9557	24.0747	15.7793	19.0314	9.252	13.0794	29.3025	23.0488
cg23466769	13	114801307	RASA3	0.104684	0.566364	0.46168	0.0251789	0.502915	24.464	14.2855	negative	-0.922722	0.851416	0.00039142	0.156987	0.1612	0.12825	0.09245	0.75096	0.33732	0.86133	0.7164	0.07332	0.0682	24.9384	20.9557	24.0747	15.7793	19.0314	9.252	13.0794	29.3025	23.0488
cg00814985	13	114801132	RASA3	0.151802	0.562618	0.410816	0.0425479	0.534162	24.464	14.2855	negative	-0.921628	0.849399	0.0004107	0.160321	0.20024	0.18886	0.11721	0.63169	0.29374	0.90368	0.80238	0.14973	0.10297	24.9384	20.9557	24.0747	15.7793	19.0314	9.252	13.0794	29.3025	23.0488
cg03646740	13	114813015	RASA3	0.135798	0.441786	0.305988	0.0175404	0.48217	24.464	14.2855	negative	-0.864821	0.747915	0.00261349	0.302201	0.20382	0.16622	0.11318	0.50281	0.26373	0.52901	0.66879	0.1311	0.06467	24.9384	20.9557	24.0747	15.7793	19.0314	9.252	13.0794	29.3025	23.0488
cg26274891	13	114843594	RASA3	0.122928	0.44138	0.318452	0.0264516	0.504772	24.464	14.2855	negative	-0.91921	0.844948	0.00045569	0.164671	0.1439	0.152	0.10636	0.53491	0.26113	0.6501	0.58366	0.12764	0.08474	24.9384	20.9557	24.0747	15.7793	19.0314	9.252	13.0794	29.3025	23.0488
cg21107044	13	114800796	RASA3	0.46614	0.75259	0.28645	0.0142928	0.465889	24.464	14.2855	negative	-0.863166	0.745056	0.00272258	0.306775	0.43881	0.511	0.46199	0.80334	0.81704	0.84691	0.82522	0.48463	0.43427	24.9384	20.9557	24.0747	15.7793	19.0314	9.252	13.0794	29.3025	23.0488
cg01334831	13	114832833	RASA3	0.19407	0.387044	0.192974	0.045313	0.540325	24.464	14.2855	negative	-0.894914	0.800872	0.00111612	0.226293	0.22145	0.25565	0.22769	0.49812	0.29066	0.5824	0.36001	0.14117	0.12439	24.9384	20.9557	24.0747	15.7793	19.0314	9.252	13.0794	29.3025	23.0488
cg00502575	13	114800841	RASA3	0.610986	0.772008	0.161022	0.049691	0.54684	24.464	14.2855	negative	-0.909958	0.828024	0.00065985	0.188241	0.6404	0.64341	0.55984	0.85684	0.70907	0.89049	0.83174	0.60881	0.60247	24.9384	20.9557	24.0747	15.7793	19.0314	9.252	13.0794	29.3025	23.0488
cg04118910	13	114875170	RASA3	0.146312	0.56785	0.421538	0.00737649	0.410153	24.464	14.2855	negative	-0.908696	0.825728	0.00069192	0.191911	0.1559	0.22339	0.13593	0.67881	0.44647	0.8329	0.56561	0.15982	0.05652	24.9384	20.9557	24.0747	15.7793	19.0314	9.252	13.0794	29.3025	23.0488
cg10800346	13	114829496	RASA3	0.06456	0.247906	0.183346	0.039068	0.52674	24.464	14.2855	negative	-0.858883	0.737679	0.00301946	0.318236	0.062	0.08262	0.06732	0.40105	0.15163	0.35937	0.24932	0.05719	0.05367	24.9384	20.9557	24.0747	15.7793	19.0314	9.252	13.0794	29.3025	23.0488
cg19462022	13	114810756	RASA3	0.097968	0.598132	0.500164	0.0153173	0.471478	24.464	14.2855	negative	-0.933976	0.872311	0.00022818	0.131035	0.12564	0.12758	0.08754	0.72559	0.39527	0.89854	0.74458	0.07907	0.07001	24.9384	20.9557	24.0747	15.7793	19.0314	9.252	13.0794	29.3025	23.0488
cg10976218	13	114880761	RASA3	0.078104	0.282868	0.204764	0.0457207	0.540819	24.464	14.2855	negative	-0.927267	0.859825	0.00031803	0.147929	0.07957	0.08109	0.09827	0.29293	0.13684	0.48624	0.38625	0.06764	0.06395	24.9384	20.9557	24.0747	15.7793	19.0314	9.252	13.0794	29.3025	23.0488
cg12667002	13	114812302	RASA3	0.194404	0.533478	0.339074	0.00488911	0.370993	24.464	14.2855	negative	-0.859223	0.738264	0.00299511	0.316681	0.24203	0.21194	0.2044	0.64207	0.42328	0.55442	0.69454	0.17231	0.14134	24.9384	20.9557	24.0747	15.7793	19.0314	9.252	13.0794	29.3025	23.0488
cg03859846	13	114810631	RASA3	0.18106	0.649342	0.468282	0.0098389	0.434903	24.464	14.2855	negative	-0.920184	0.846739	0.00043718	0.16246	0.25758	0.22722	0.16064	0.81065	0.46793	0.86925	0.76912	0.138	0.12186	24.9384	20.9557	24.0747	15.7793	19.0314	9.252	13.0794	29.3025	23.0488
cg21261158	13	114875412	RASA3	0.028102	0.5379	0.509798	0.037809	0.524129	24.464	14.2855	negative	-0.914513	0.836333	0.00055276	0.176095	0.01211	0.04268	0.04751	0.73048	0.1647	0.9087	0.77854	0.01663	0.02158	24.9384	20.9557	24.0747	15.7793	19.0314	9.252	13.0794	29.3025	23.0488
cg24132632	13	114872787	RASA3	0.46595	0.675412	0.209462	0.015311	0.471478	24.464	14.2855	negative	-0.886029	0.785047	0.00146956	0.247136	0.51537	0.43707	0.48698	0.76401	0.47767	0.78864	0.69857	0.35471	0.53562	24.9384	20.9557	24.0747	15.7793	19.0314	9.252	13.0794	29.3025	23.0488
cg24113818	13	114875199	RASA3	0.09121	0.474828	0.383618	0.0443631	0.538457	24.464	14.2855	negative	-0.890295	0.792625	0.00129146	0.237666	0.1091	0.12432	0.08977	0.65647	0.17228	0.83417	0.5461	0.10443	0.02843	24.9384	20.9557	24.0747	15.7793	19.0314	9.252	13.0794	29.3025	23.0488
cg24143729	13	114820861	RASA3	0.505316	0.74524	0.239924	0.0386477	0.526053	24.464	14.2855	negative	-0.944576	0.892223	0.00040815	0.160321	0.48665	0.59093	0.52042	0.8253		0.79233	0.83572	0.40985	0.51873	24.9384	20.9557	24.0747	15.7793	19.0314	9.252	13.0794	29.3025	23.0488
cg07183876	5	80257268	RASGRF2	0.678382	0.329632	-0.34875	0.010379	0.438836	1.35164	5.13462	negative	-0.898494	0.807291	0.00099222	0.214567	0.71927	0.67441	0.66515	0.37061	0.39835	0.12085	0.1952	0.64019	0.69289	0.489091	2.12787	1.79084	5.29761	1.3169	8.08869	5.83527	1.44152	0.90886
cg23146346	6	17282859	RBM24	0.067874	0.38726	0.319386	0.0191858	0.48738	23.6276	9.77404	negative	-0.841228	0.707664	0.00447956	0.354477	0.06213	0.06219	0.0866	0.5641	0.27704	0.374	0.58122	0.07304	0.05541	29.312	17.8319	21.1433	8.06803	14.2509	5.80902	10.9682	22.6035	27.2473
cg23207527	6	17283113	RBM24	0.184776	0.674062	0.489286	0.00813921	0.41975	23.6276	9.77404	negative	-0.865082	0.748368	0.00259652	0.301572	0.24412	0.10586	0.25561	0.83404	0.60182	0.84475	0.80306	0.12118	0.19711	29.312	17.8319	21.1433	8.06803	14.2509	5.80902	10.9682	22.6035	27.2473
cg02696675	2	161265366	RBMS1	0.403646	0.718708	0.315062	0.030922	0.513259	28.6992	19.9729	negative	-0.907538	0.823626	0.00072227	0.194443	0.48108	0.38772	0.50356	0.8714	0.58034	0.89112	0.86042	0.24907	0.3968	28.6624	26.1266	28.2648	20.8549	28.1457	16.3512	14.5397	31.181	29.261
cg23489137	2	161290449	RBMS1	0.253666	0.59473	0.341064	0.0333387	0.516822	28.6992	19.9729	negative	-0.944314	0.891729	0.00012703	0.101286	0.34527	0.29841	0.23067	0.59923	0.43006	0.80367	0.86264	0.26892	0.12506	28.6624	26.1266	28.2648	20.8549	28.1457	16.3512	14.5397	31.181	29.261
cg18852574	2	161265289	RBMS1	0.274852	0.625124	0.350272	0.034619	0.518533	28.6992	19.9729	negative	-0.972968	0.946667	1.041e-05	0.0379319	0.27948	0.31993	0.37099	0.69543	0.38569	0.88896	0.82788	0.14846	0.2554	28.6624	26.1266	28.2648	20.8549	28.1457	16.3512	14.5397	31.181	29.261
cg03157115	2	161265247	RBMS1	0.220518	0.619292	0.398774	0.0224101	0.496186	28.6992	19.9729	negative	-0.966587	0.93429	2.173e-05	0.0478678	0.25725	0.27482	0.26072	0.7049	0.38695	0.88051	0.81108	0.09572	0.21408	28.6624	26.1266	28.2648	20.8549	28.1457	16.3512	14.5397	31.181	29.261
cg19506623	2	161265259	RBMS1	0.135216	0.607926	0.47271	0.041772	0.532817	28.6992	19.9729	negative	-0.976426	0.953409	6.472e-06	0.0300607	0.14064	0.17022	0.18192	0.73439	0.24779	0.93525	0.92129	0.08212	0.10118	28.6624	26.1266	28.2648	20.8549	28.1457	16.3512	14.5397	31.181	29.261
cg00335252	2	161245200	RBMS1	0.197924	0.496696	0.298772	0.0241798	0.500874	28.6992	19.9729	negative	-0.887391	0.787462	0.00141096	0.243481	0.30559	0.18139	0.2142	0.58401	0.37105	0.73355	0.5642	0.15405	0.13439	28.6624	26.1266	28.2648	20.8549	28.1457	16.3512	14.5397	31.181	29.261
cg11863854	3	29471980	RBMS3	0.67888	0.333922	-0.344958	0.00911448	0.4297	6.08988	9.04503	negative	-0.898376	0.807079	0.00099613	0.21499	0.66545	0.72883	0.6581	0.17531	0.44971	0.13328	0.3866	0.72235	0.61967	6.29453	7.09535	5.80105	9.75232	6.45245	10.8642	9.11116	5.7176	5.54089
cg16565002	3	29507737	RBMS3	0.627702	0.46142	-0.166282	0.00416201	0.353623	6.08988	9.04503	negative	-0.947677	0.898092	0.00010249	0.0897812	0.63919	0.56	0.61722	0.45704	0.54689	0.34391	0.48875	0.69252	0.62958	6.29453	7.09535	5.80105	9.75232	6.45245	10.8642	9.11116	5.7176	5.54089
cg19083007	6	46293862	RCAN2	0.34748	0.098698	-0.248782	4.542e-05	0.0829182	0.546069	4.78163	negative	-0.915542	0.838217	0.00053036	0.172488	0.39871	0.36906	0.34656	0.05758	0.07056	0.17275	0.12607	0.35697	0.2661	0.148935	1.68114	0.241822	6.83707	5.52008	3.5279	3.24146	0.311065	0.347382
cg24901474	1	163173040	RGS5	0.793448	0.447422	-0.346026	0.0108557	0.442349	0.260334	35.2278	negative	-0.913103	0.833757	0.0005845	0.179786	0.84304	0.79568	0.7516	0.22433	0.50184	0.2999	0.61899	0.77975	0.79717	0.317922	0.286106	0.251011	36.1491	21.4321	63.0256	20.3045	0.178839	0.267791
cg00250483	1	163172914	RGS5	0.725574	0.432056	-0.293518	0.0221991	0.495506	0.260334	35.2278	negative	-0.920451	0.84723	0.0004322	0.16239	0.741	0.69517	0.74465	0.2935	0.65676	0.23015	0.40108	0.70977	0.73728	0.317922	0.286106	0.251011	36.1491	21.4321	63.0256	20.3045	0.178839	0.267791
cg02579477	1	163173262	RGS5	0.791698	0.505576	-0.286122	0.0197655	0.489209	0.260334	35.2278	negative	-0.916967	0.840829	0.0005004	0.168389	0.80237	0.7882	0.76843	0.36203	0.71753	0.32683	0.47959	0.80248	0.79701	0.317922	0.286106	0.251011	36.1491	21.4321	63.0256	20.3045	0.178839	0.267791
cg12940993	14	21271148	RNASE1	0.456658	0.209914	-0.246744	0.0413852	0.532269	0.0118958	4.06937	negative	-0.952882	0.907984	7.139e-05	0.0784742	0.38043	0.49005	0.51666	0.08482	0.39669	0.05689	0.07324	0.40444	0.49171	0	0	0.059479	5.45559	0.289486	4.3508	6.18162	0	0
cg05958352	14	21270924	RNASE1	0.858118	0.518004	-0.340114	0.0230607	0.497694	0.0118958	4.06937	negative	-0.928656	0.862402	0.0002977	0.144162	0.79788	0.87134	0.86199	0.42761	0.6253	0.34249	0.34896	0.84765	0.91173	0	0	0.059479	5.45559	0.289486	4.3508	6.18162	0	0
cg15611336	15	75248496	RPP25	0.456064	0.167546	-0.288518	0.0237131	0.49935	3.32852	9.77868	negative	-0.838294	0.702736	0.0047616	0.361449	0.48632	0.40822	0.4632	0.16909	0.10931	0.03035	0.04606	0.43228	0.4903	2.12145	0.603865	4.03644	9.31588	9.2663	13.3152	7.21735	5.97493	3.90593
cg27542341	15	75248086	RPP25	0.984266	0.536092	-0.448174	0.038365	0.525095	3.32852	9.77868	negative	-0.841709	0.708474	0.00443439	0.353807	0.98199	0.98112	0.98101	0.51927	0.74187	0.1152	0.34561	0.98302	0.99419	2.12145	0.603865	4.03644	9.31588	9.2663	13.3152	7.21735	5.97493	3.90593
cg05651511	17	78754090	RPTOR	0.085476	0.459118	0.373642	0.027724	0.506724	8.92508	7.47509	negative	-0.918279	0.843237	0.00047389	0.165878	0.16194	0.10131	0.06395	0.57553	0.30935	0.78484	0.49567	0.04718	0.053	8.73476	8.31727	9.08173	7.19985	7.84213	7.30654	7.55183	9.26639	9.22526
cg22386583	17	78753756	RPTOR	0.141808	0.58418	0.442372	0.0389298	0.526509	8.92508	7.47509	negative	-0.905759	0.820399	0.00077072	0.197592	0.16959	0.1412	0.18148	0.78806	0.3348	0.87401	0.78839	0.11127	0.1055	8.73476	8.31727	9.08173	7.19985	7.84213	7.30654	7.55183	9.26639	9.22526
cg12654199	17	78753826	RPTOR	0.169364	0.594252	0.424888	0.0282793	0.507815	8.92508	7.47509	negative	-0.922792	0.851545	0.00039021	0.156967	0.22759	0.22857	0.16574	0.68603	0.38361	0.88795	0.80363	0.10201	0.12291	8.73476	8.31727	9.08173	7.19985	7.84213	7.30654	7.55183	9.26639	9.22526
cg03794617	17	78796999	RPTOR	0.112858	0.631842	0.518984	0.0190145	0.487126	8.92508	7.47509	negative	-0.92412	0.853998	0.0003677	0.154753	0.13195	0.15269	0.12297	0.82475	0.35545	0.90367	0.83099	0.08342	0.07326	8.73476	8.31727	9.08173	7.19985	7.84213	7.30654	7.55183	9.26639	9.22526
cg01516792	17	78779140	RPTOR	0.666948	0.917492	0.250544	1.321e-05	0.0572563	8.92508	7.47509	negative	-0.910904	0.829745	0.00063652	0.184639	0.6517	0.69201	0.64431	0.9136	0.93054	0.92113	0.90245	0.70695	0.63977	8.73476	8.31727	9.08173	7.19985	7.84213	7.30654	7.55183	9.26639	9.22526
cg09491897	17	78935269	RPTOR	0.609356	0.833208	0.223852	0.00027122	0.147753	8.92508	7.47509	negative	-0.8863	0.785527	0.00145779	0.246419	0.70386	0.59227	0.5586	0.82233	0.82995	0.93355	0.79276	0.60664	0.58541	8.73476	8.31727	9.08173	7.19985	7.84213	7.30654	7.55183	9.26639	9.22526
cg18758433	17	78623601	RPTOR	0.100214	0.449126	0.348912	0.0157408	0.473826	8.92508	7.47509	negative	-0.925269	0.856123	0.00034899	0.151035	0.16897	0.08833	0.09417	0.63607	0.30397	0.5408	0.58764	0.08756	0.06204	8.73476	8.31727	9.08173	7.19985	7.84213	7.30654	7.55183	9.26639	9.22526
cg08329754	17	78797015	RPTOR	0.109336	0.583664	0.474328	0.0233487	0.498216	8.92508	7.47509	negative	-0.89271	0.796931	0.00119758	0.231387	0.11004	0.11941	0.13274	0.74306	0.27649	0.88016	0.76956	0.08715	0.09734	8.73476	8.31727	9.08173	7.19985	7.84213	7.30654	7.55183	9.26639	9.22526
cg09001356	17	78797061	RPTOR	0.09952	0.617756	0.518236	0.0202065	0.490796	8.92508	7.47509	negative	-0.903777	0.816812	0.00082733	0.201569	0.11853	0.13819	0.12811	0.80634	0.26834	0.88514	0.84498	0.05772	0.05505	8.73476	8.31727	9.08173	7.19985	7.84213	7.30654	7.55183	9.26639	9.22526
cg19122260	17	78808570	RPTOR	0.3795	0.776876	0.397376	0.00460734	0.362711	8.92508	7.47509	negative	-0.934183	0.872697	0.00022574	0.130574	0.36764	0.54559	0.39748	0.89779	0.49822	0.90956	0.89033	0.22133	0.36546	8.73476	8.31727	9.08173	7.19985	7.84213	7.30654	7.55183	9.26639	9.22526
cg13643509	17	78915655	RPTOR	0.23484	0.527558	0.292718	0.0304045	0.511438	8.92508	7.47509	negative	-0.890207	0.792468	0.00129496	0.23778	0.31519	0.28388	0.20004	0.70537	0.31256	0.57296	0.73367	0.21212	0.16297	8.73476	8.31727	9.08173	7.19985	7.84213	7.30654	7.55183	9.26639	9.22526
cg00549398	17	78725201	RPTOR	0.15332	0.453632	0.300312	0.0444684	0.538763	8.92508	7.47509	negative	-0.840917	0.707141	0.00450887	0.35524	0.41546	0.06929	0.06838	0.72896	0.30493	0.56818	0.51915	0.15034	0.06313	8.73476	8.31727	9.08173	7.19985	7.84213	7.30654	7.55183	9.26639	9.22526
cg15230985	17	78753887	RPTOR	0.184076	0.540138	0.356062	0.0483221	0.54486	8.92508	7.47509	negative	-0.909339	0.826898	0.00067545	0.190615	0.2571	0.27609	0.17406	0.6058	0.34406	0.91213	0.66515	0.10082	0.11231	8.73476	8.31727	9.08173	7.19985	7.84213	7.30654	7.55183	9.26639	9.22526
cg07120544	8	93076082	RUNX1T1	0.431356	0.709486	0.27813	0.00019241	0.131578	1.33343	0.660405	negative	-0.865896	0.749777	0.00254421	0.298618	0.42235	0.44899	0.46954	0.59444	0.76657	0.75972	0.68586	0.35826	0.45764	1.46964	1.51071	0.905687	0.617202	0.663358	0.477308	0.883753	1.65026	1.13087
cg00045118	8	93076177	RUNX1T1	0.70618	0.896616	0.190436	0.00052872	0.187906	1.33343	0.660405	negative	-0.864332	0.747069	0.00264542	0.303618	0.73174	0.70274	0.70555	0.89906	0.90702	0.88569	0.8965	0.63625	0.75462	1.46964	1.51071	0.905687	0.617202	0.663358	0.477308	0.883753	1.65026	1.13087
cg02411529	8	93062790	RUNX1T1	0.587848	0.895628	0.30778	0.00077787	0.21222	1.33343	0.660405	negative	-0.934829	0.873905	0.00021821	0.128595	0.60222	0.56895	0.68315	0.89858	0.90694	0.92744	0.91544	0.44089	0.64403	1.46964	1.51071	0.905687	0.617202	0.663358	0.477308	0.883753	1.65026	1.13087
cg05217983	6	45406867	RUNX2	0.057532	0.334958	0.277426	0.0420612	0.533297	5.15932	2.9145	negative	-0.840453	0.706361	0.00455291	0.356896	0.07517	0.06699	0.06982	0.22574	0.37658	0.6583	0.32486	0.06031	0.01537	6.6684	3.41005	5.18504	3.71627	2.83042	1.2107	3.90062	5.51866	5.01447
cg13786567	9	137258920	RXRA	0.467198	0.638156	0.170958	0.0367545	0.522732	10.1372	7.70896	negative	-0.889619	0.791422	0.00131861	0.239232	0.50094	0.54581	0.44385	0.77932	0.51593	0.68354	0.71978	0.38765	0.45774	9.3414	9.37914	10.8934	5.8839	9.03305	9.51287	6.40603	10.9495	10.1226
cg14344989	9	137329237	RXRA	0.417922	0.661686	0.243764	5.519e-05	0.0858432	10.1372	7.70896	negative	-0.84722	0.717781	0.00393946	0.345705	0.45652	0.46215	0.39707	0.7455	0.66372	0.62764	0.66478	0.37701	0.39686	9.3414	9.37914	10.8934	5.8839	9.03305	9.51287	6.40603	10.9495	10.1226
cg26894575	1	153518054	S100A4	0.068362	0.267876	0.199514	0.0122851	0.453571	541.077	56.095	negative	-0.887807	0.788201	0.00139339	0.24224	0.06552	0.07011	0.05782	0.3062	0.18099	0.31693	0.39278	0.08061	0.06775	477.433	304.858	667.026	37.9269	160.776	6.28968	19.3873	666.2	589.867
cg01411912	1	153517265	S100A4	0.557578	0.734584	0.177006	0.00178368	0.274894	541.077	56.095	negative	-0.849747	0.72207	0.0037257	0.340274	0.56431	0.546	0.55873	0.68168	0.78683	0.78251	0.75507	0.54659	0.57226	477.433	304.858	667.026	37.9269	160.776	6.28968	19.3873	666.2	589.867
cg23048494	1	153517384	S100A4	0.26266	0.562474	0.299814	0.0271011	0.505579	541.077	56.095	negative	-0.88605	0.785085	0.00146863	0.247136	0.2852	0.31066	0.24105	0.56627	0.38417	0.75554	0.76588	0.26329	0.2131	477.433	304.858	667.026	37.9269	160.776	6.28968	19.3873	666.2	589.867
cg13091627	1	153518476	S100A4	0.34866	0.65459	0.30593	0.0223648	0.496186	541.077	56.095	negative	-0.95004	0.902576	8.738e-05	0.0840158	0.34449	0.43824	0.33935	0.73903	0.53983	0.81927	0.80719	0.28001	0.34121	477.433	304.858	667.026	37.9269	160.776	6.28968	19.3873	666.2	589.867
cg24691453	1	153518384	S100A4	0.255632	0.615916	0.360284	0.0390939	0.526841	541.077	56.095	negative	-0.890208	0.79247	0.00129492	0.23778	0.2329	0.33534	0.25583	0.7314	0.37095	0.8835	0.80694	0.23024	0.22385	477.433	304.858	667.026	37.9269	160.776	6.28968	19.3873	666.2	589.867
cg18273417	1	153518418	S100A4	0.11295	0.646878	0.533928	0.0239594	0.500461	541.077	56.095	negative	-0.915728	0.838558	0.00052638	0.172276	0.06634	0.24114	0.12964	0.85406	0.37021	0.93813	0.88752	0.09202	0.03561	477.433	304.858	667.026	37.9269	160.776	6.28968	19.3873	666.2	589.867
cg08018825	4	25865188	SEL1L3	0.763668	0.611372	-0.152296	0.0412585	0.532043	0.880265	49.531	negative	-0.905224	0.819431	0.00078571	0.198568	0.8073	0.72175	0.74516	0.55921	0.72235	0.59295	0.45247	0.76853	0.7756	0.195832	0.0524891	1.36327	65.3688	10.2648	65.4421	57.0482	0.330372	2.45936
cg21792983	4	25818940	SEL1L3	0.458332	0.180092	-0.27824	0.0162442	0.476228	0.880265	49.531	negative	-0.934093	0.87253	0.00022679	0.130756	0.50767	0.42765	0.43143	0.10729	0.22226	0.04003	0.08764	0.50076	0.42415	0.195832	0.0524891	1.36327	65.3688	10.2648	65.4421	57.0482	0.330372	2.45936
cg08239804	6	134497755	SGK1	0.497782	0.275708	-0.222074	0.0122119	0.45296	40.7253	175.9	negative	-0.889934	0.791983	0.00130588	0.238194	0.46946	0.47128	0.49512	0.22514	0.41621	0.24087	0.12294	0.51793	0.53512	70.6518	17.1333	27.9585	147.999	89.7247	260.786	205.091	38.7884	49.0945
cg08640361	6	134494620	SGK1	0.69934	0.28054	-0.4188	0.00650903	0.396258	40.7253	175.9	negative	-0.926367	0.858155	0.00033173	0.149011	0.7019	0.68204	0.64442	0.2016	0.40512	0.12079	0.12969	0.74711	0.72123	70.6518	17.1333	27.9585	147.999	89.7247	260.786	205.091	38.7884	49.0945
cg21676440	6	134493324	SGK1	0.917918	0.523126	-0.394792	0.0349877	0.51894	40.7253	175.9	negative	-0.977558	0.955619	5.455e-06	0.027255	0.90279	0.91415	0.91276	0.51748	0.74224	0.22167	0.27144	0.91902	0.94087	70.6518	17.1333	27.9585	147.999	89.7247	260.786	205.091	38.7884	49.0945
cg18566177	6	134491483	SGK1	0.945804	0.500142	-0.445662	0.036899	0.52293	40.7253	175.9	negative	-0.971418	0.943654	1.264e-05	0.0396957	0.95665	0.93392	0.94035	0.58831	0.68726	0.12646	0.20906	0.94033	0.95777	70.6518	17.1333	27.9585	147.999	89.7247	260.786	205.091	38.7884	49.0945
cg21366688	6	134491421	SGK1	0.807826	0.357524	-0.450302	0.0270156	0.505579	40.7253	175.9	negative	-0.938985	0.881693	0.00017399	0.116237	0.8189	0.84471	0.73908	0.44227	0.38655	0.05413	0.10803	0.79953	0.83691	70.6518	17.1333	27.9585	147.999	89.7247	260.786	205.091	38.7884	49.0945
cg07397616	22	38035109	SH3BP1	0.394386	0.665246	0.27086	0.00010349	0.107385	6.92419	3.98271	negative	-0.864106	0.746679	0.00266024	0.303919	0.41615	0.39398	0.35012	0.67452	0.60661	0.69416	0.75295	0.47056	0.34112	6.67509	7.58003	7.20615	5.59135	4.35769	2.00131	3.98047	5.83952	7.32014
cg05336051	4	2813724	SH3BP2	0.133202	0.315128	0.181926	0.016103	0.475591	6.85998	4.03707	negative	-0.857357	0.735061	0.00313037	0.321916	0.09998	0.10717	0.23038	0.4166	0.22365	0.44908	0.2269	0.09083	0.13765	6.70752	7.22769	5.33361	4.6931	4.51186	2.82895	4.11435	8.14809	6.88297
cg04087571	11	116723030	SIK3	0.704344	0.462296	-0.242048	0.00204179	0.286956	3.22007	5.56463	negative	-0.908746	0.82582	0.00069063	0.191868	0.6563	0.67222	0.70047	0.41389	0.5391	0.32442	0.50593	0.72791	0.76482	3.45056	3.27068	2.90512	5.69118	3.31179	7.54639	5.70915	3.63467	2.8393
cg07139449	14	72154514	SIPA1L1	0.899332	0.626826	-0.272506	0.00703908	0.405349	4.24478	20.59	negative	-0.945183	0.893371	0.00012033	0.0982224	0.90442	0.92233	0.87799	0.67566	0.78327	0.46973	0.54529	0.89442	0.8975	3.0873	3.46945	4.15343	24.8303	9.67784	27.477	20.3749	5.17556	5.33817
cg14688905	12	51403056	SLC11A2	0.847586	0.64017	-0.207416	0.0326982	0.516141	10.0795	16.2607	negative	-0.92292	0.851782	0.000388	0.156967	0.79211	0.87296	0.85655	0.65395	0.76654	0.42809	0.56562	0.81427	0.90204	9.97737	9.29754	10.5566	16.149	12.755	17.4671	18.6718	10.4854	10.0804
cg10475489	6	3269808	SLC22A23	0.867516	0.673026	-0.19449	0.0278998	0.507059	0.427593	7.99599	negative	-0.964464	0.930192	2.69e-05	0.0512788	0.88779	0.89488	0.85583	0.70561	0.77048	0.51673	0.55673	0.82586	0.87322	0.625561	0.127336	0.419962	7.77866	4.26754	9.92525	10.0125	0.292651	0.672454
cg16887070	6	3324467	SLC22A23	0.867056	0.546078	-0.320978	0.00081157	0.215522	0.427593	7.99599	negative	-0.854242	0.72973	0.00336546	0.329532	0.80583	0.8864	0.86677	0.54221	0.51462	0.65759	0.40511	0.86547	0.91081	0.625561	0.127336	0.419962	7.77866	4.26754	9.92525	10.0125	0.292651	0.672454
cg16190510	12	40197081	SLC2A13	0.108644	0.501276	0.392632	0.0308499	0.513018	2.70669	1.41984	negative	-0.855989	0.732717	0.00323221	0.325771	0.13479	0.13628	0.11469	0.71338	0.30786	0.73335	0.6258	0.10489	0.05257	2.0834	2.82843	2.79276	1.51587	1.67064	1.11425	1.37859	3.35255	2.4763
cg14061497	12	40496213	SLC2A13	0.556452	0.829224	0.272772	0.0001022	0.107347	2.70669	1.41984	negative	-0.90644	0.821634	0.00075192	0.196725	0.54979	0.54726	0.60608	0.84439	0.85192	0.83082	0.8241	0.47375	0.60538	2.0834	2.82843	2.79276	1.51587	1.67064	1.11425	1.37859	3.35255	2.4763
cg00415424	2	40622490	SLC8A1	0.072528	0.361064	0.288536	0.0141415	0.465388	21.2673	3.36127	negative	-0.841509	0.708138	0.0044531	0.353807	0.06575	0.04493	0.08423	0.36059	0.22467	0.55667	0.47818	0.12325	0.04448	20.3562	19.5557	13.2199	3.60054	4.51556	0.795956	4.53301	26.2176	26.987
cg00870449	2	40508306	SLC8A1	0.094286	0.455886	0.3616	0.0311792	0.513682	21.2673	3.36127	negative	-0.91432	0.835981	0.00055702	0.176343	0.06811	0.1064	0.15048	0.58535	0.36252	0.73509	0.52002	0.09888	0.04756	20.3562	19.5557	13.2199	3.60054	4.51556	0.795956	4.53301	26.2176	26.987
cg08245249	2	40342248	SLC8A1	0.272586	0.717708	0.445122	0.00031884	0.156212	21.2673	3.36127	negative	-0.881331	0.776744	0.0016847	0.259239	0.43141	0.19361	0.23911	0.80919	0.65888	0.80511	0.79164	0.31517	0.18363	20.3562	19.5557	13.2199	3.60054	4.51556	0.795956	4.53301	26.2176	26.987
cg04751761	16	2084192	SLC9A3R2	0.052198	0.318706	0.266508	0.0224891	0.496468	52.182	18.8553	negative	-0.851166	0.724484	0.00360926	0.337083	0.0595	0.04924	0.06159	0.41345	0.17897	0.48023	0.41533	0.05691	0.03375	39.3059	32.3996	66.8107	12.1386	36.1833	11.5771	15.5221	67.5352	54.8588
cg05194102	16	2088960	SLC9A3R2	0.20495	0.818132	0.613182	7.378e-05	0.0966903	52.182	18.8553	negative	-0.912806	0.833215	0.00059134	0.179786	0.31706	0.37612	0.1295	0.88505	0.77289	0.87293	0.94321	0.12259	0.07948	39.3059	32.3996	66.8107	12.1386	36.1833	11.5771	15.5221	67.5352	54.8588
cg09462956	16	2082777	SLC9A3R2	0.076866	0.42035	0.343484	0.0222984	0.495853	52.182	18.8553	negative	-0.869137	0.755399	0.00234319	0.287531	0.08304	0.09396	0.0828	0.59623	0.26589	0.60975	0.49911	0.06818	0.05635	39.3059	32.3996	66.8107	12.1386	36.1833	11.5771	15.5221	67.5352	54.8588
cg01346158	16	2088997	SLC9A3R2	0.255342	0.533918	0.278576	0.00012824	0.116023	52.182	18.8553	negative	-0.900137	0.810246	0.00093869	0.210407	0.25446	0.37344	0.2293	0.55039	0.50034	0.53626	0.60892	0.2175	0.20201	39.3059	32.3996	66.8107	12.1386	36.1833	11.5771	15.5221	67.5352	54.8588
cg08074555	16	2084795	SLC9A3R2	0.047944	0.533686	0.485742	0.0235655	0.498717	52.182	18.8553	negative	-0.854667	0.730456	0.00333271	0.32883	0.04502	0.05548	0.05735	0.71152	0.30457	0.83191	0.70126	0.05688	0.02499	39.3059	32.3996	66.8107	12.1386	36.1833	11.5771	15.5221	67.5352	54.8588
cg05251269	16	2083128	SLC9A3R2	0.065278	0.286224	0.220946	0.0261198	0.504096	52.182	18.8553	negative	-0.860252	0.740034	0.00292224	0.313773	0.06799	0.0722	0.06792	0.43388	0.17324	0.38855	0.33582	0.06209	0.05619	39.3059	32.3996	66.8107	12.1386	36.1833	11.5771	15.5221	67.5352	54.8588
cg07405121	16	2083168	SLC9A3R2	0.05267	0.267906	0.215236	0.0389329	0.526509	52.182	18.8553	negative	-0.848238	0.719507	0.00385238	0.343155	0.06477	0.05863	0.05584	0.45835	0.14289	0.36554	0.30223	0.04955	0.03456	39.3059	32.3996	66.8107	12.1386	36.1833	11.5771	15.5221	67.5352	54.8588
cg20018563	15	92690264	SLCO3A1	0.725168	0.473078	-0.25209	0.0170794	0.480393	6.05823	10.7351	negative	-0.918121	0.842947	0.00047703	0.166472	0.72563	0.63524	0.75137	0.40352	0.50939	0.32277	0.41318	0.7328	0.7808	4.9522	7.56571	6.76331	10.1818	11.066	12.6292	9.06353	5.43209	5.57783
cg27601574	22	31498863	SMTN	0.081018	0.419018	0.338	0.0290966	0.508876	55.5557	21.3116	negative	-0.899684	0.809431	0.00095324	0.21136	0.07756	0.11699	0.08442	0.64321	0.25085	0.58265	0.50715	0.06767	0.05845	43.3679	54.3932	69.3819	22.755	33.2847	11.4116	17.7949	57.7046	52.9308
cg00341732	22	31479561	SMTN	0.373992	0.618474	0.244482	0.0135187	0.461635	55.5557	21.3116	negative	-0.926188	0.857824	0.0003345	0.149037	0.37273	0.40885	0.3604	0.63207	0.50072	0.7444	0.74983	0.3864	0.34158	43.3679	54.3932	69.3819	22.755	33.2847	11.4116	17.7949	57.7046	52.9308
cg11963755	1	214477205	SMYD2	0.35116	0.67188	0.32072	0.0379101	0.524245	23.4374	20.4189	negative	-0.848997	0.720796	0.00378828	0.341806	0.26257	0.6052	0.29867	0.77232	0.43287	0.90328	0.8486	0.30104	0.28832	23.3947	19.394	26.3997	21.2785	23.6709	19.7907	16.9355	24.5994	23.3994
cg07289841	5	121686873	SNCAIP	0.426712	0.649834	0.223122	0.0184772	0.486183	5.11821	1.43278	negative	-0.854668	0.730457	0.00333267	0.32883	0.3748	0.4754	0.52069	0.75398	0.64295	0.66951	0.75817	0.29586	0.46681	3.94028	4.37641	4.56766	2.08254	0.733496	2.13764	0.777425	9.12257	3.58413
cg16358034	5	53815303	SNX18	0.964428	0.791732	-0.172696	0.0438899	0.537551	13.8608	21.7828	negative	-0.870118	0.757105	0.00228459	0.285674	0.96463	0.96273	0.9591	0.84145	0.84063	0.68084	0.63413	0.95714	0.97854	11.5312	17.0545	10.9621	11.4601	19.6566	26.5165	29.498	14.521	15.2352
cg23092956	2	54846562	SPTBN1	0.816212	0.488782	-0.32743	0.00359674	0.340819	31.7325	66.5905	negative	-0.920117	0.846615	0.00043844	0.16246	0.83358	0.75824	0.83821	0.36085	0.58556	0.36564	0.46988	0.77829	0.87274	33.9045	27.2294	29.3807	85.7164	59.2565	62.8551	58.5342	33.3222	34.8257
cg02794358	2	54816818	SPTBN1	0.852294	0.425194	-0.4271	0.0315282	0.514122	31.7325	66.5905	negative	-0.863159	0.745043	0.00272306	0.306775	0.86115	0.68948	0.90741	0.17113	0.65992	0.24721	0.21094	0.87837	0.92506	33.9045	27.2294	29.3807	85.7164	59.2565	62.8551	58.5342	33.3222	34.8257
cg16667251	2	54697181	SPTBN1	0.74415	0.291168	-0.452982	0.00194856	0.282944	31.7325	66.5905	negative	-0.83835	0.702831	0.00475604	0.361449	0.6839	0.79305	0.80537	0.30199	0.40721	0.13638	0.11608	0.65757	0.78086	33.9045	27.2294	29.3807	85.7164	59.2565	62.8551	58.5342	33.3222	34.8257
cg24544082	2	54751507	SPTBN1	0.763048	0.453252	-0.309796	0.00653716	0.396437	31.7325	66.5905	negative	-0.899484	0.809072	0.0009597	0.212125	0.63422	0.78584	0.79782	0.32574	0.50717	0.26796	0.53918	0.7677	0.82966	33.9045	27.2294	29.3807	85.7164	59.2565	62.8551	58.5342	33.3222	34.8257
cg26904169	7	89839865	STEAP2	0.896888	0.733076	-0.163812	0.0453631	0.540325	1.06531	2.6888	negative	-0.909202	0.826649	0.00067893	0.19104	0.89638	0.89008	0.89793	0.66418	0.81948	0.57135	0.71453	0.90935	0.8907	1.47062	0.665729	1.93347	2.62613	1.47997	4.03051	2.61859	0.270885	0.98587
cg10593165	4	5116565	STK32B	0.140066	0.319248	0.179182	0.0172304	0.481206	9.35815	3.35834	negative	-0.90583	0.820527	0.00076876	0.197548	0.16407	0.15068	0.11589	0.3987	0.19214	0.39793	0.39385	0.17067	0.09902	12.0544	9.55711	10.6074	1.62046	10.2035	0.787696	0.821687	6.45892	8.11291
cg23965931	4	184828386	STOX2	0.446942	0.216344	-0.230598	0.0178341	0.483153	0.0103447	1.33308	negative	-0.864836	0.747942	0.00261249	0.302201	0.34381	0.49928	0.50155	0.16674	0.34182	0.0821	0.1121	0.33001	0.56006	0.00869178	0.0256284	0	0.779666	0.646383	2.10969	1.7966	0	0.0174032
cg00049475	10	29923736	SVIL	0.825494	0.492648	-0.332846	2.266e-07	0.0163914	1.63803	10.6112	negative	-0.868541	0.754364	0.00237928	0.289536	0.86034	0.79174	0.79341	0.4857	0.4789	0.50612	0.45132	0.83151	0.85047	1.86415	3.06488	1.13499	9.31495	5.07688	12.781	15.2718	1.50306	0.623074
cg11801524	10	29811563	SVIL	0.646744	0.369808	-0.276936	0.0472445	0.54285	1.63803	10.6112	negative	-0.92462	0.854922	0.00035948	0.153258	0.64981	0.58083	0.72666	0.44269	0.39474	0.1473	0.17264	0.51764	0.75878	1.86415	3.06488	1.13499	9.31495	5.07688	12.781	15.2718	1.50306	0.623074
cg22991992	8	38697076	TACC1	0.132782	0.681232	0.54845	0.0111111	0.444272	46.1793	18.1707	negative	-0.959374	0.920398	4.276e-05	0.0646701	0.12065	0.12488	0.17828	0.85388	0.59799	0.9294	0.7933	0.17021	0.06989	49.9308	38.2638	51.5592	18.4137	27.5384	12.1741	14.5567	44.3744	46.7682
cg15299510	8	38628105	TACC1	0.061996	0.224358	0.162362	0.0356591	0.519877	46.1793	18.1707	negative	-0.884127	0.781681	0.00155418	0.251231	0.06072	0.06569	0.07999	0.20834	0.17296	0.4154	0.22608	0.06871	0.03487	49.9308	38.2638	51.5592	18.4137	27.5384	12.1741	14.5567	44.3744	46.7682
cg11631427	17	59478579	TBX2	0.05845	0.290842	0.232392	0.0437394	0.537224	7.53352	1.86931	negative	-0.8466	0.716731	0.00399316	0.347027	0.05044	0.08739	0.06676	0.33237	0.13408	0.53012	0.36575	0.05664	0.03102	6.40121	4.19306	8.54871	1.15293	4.58504	0.207255	1.53202	11.3101	7.21451
cg00517511	12	115115415	TBX3	0.158238	0.661212	0.502974	0.0167567	0.478636	29.005	9.65236	negative	-0.843579	0.711626	0.00426193	0.351376	0.26891	0.15551	0.15181	0.8121	0.46867	0.92065	0.86212	0.09428	0.12068	28.1897	24.8397	31.0109	15.4745	6.52602	7.22089	9.38804	35.8759	25.1089
cg00347620	12	115109730	TBX3	0.087186	0.637586	0.5504	0.00981983	0.43485	29.005	9.65236	negative	-0.846908	0.717253	0.00396642	0.346227	0.10199	0.0989	0.09415	0.74837	0.44567	0.95323	0.75515	0.09499	0.0459	28.1897	24.8397	31.0109	15.4745	6.52602	7.22089	9.38804	35.8759	25.1089
cg23352146	11	12701929	TEAD1	0.15776	0.384782	0.227022	0.0488084	0.545453	56.222	37.8198	negative	-0.892603	0.79674	0.00120162	0.231602	0.18688	0.2002	0.15365	0.48508	0.28526	0.46475	0.57274	0.13004	0.11803	62.0161	41.789	57.8306	34.3244	45.2792	40.0257	31.6498	57.288	62.1865
cg08757862	4	38807382	TLR1	0.742562	0.29037	-0.452192	0.00551977	0.381285	0.187437	2.40151	negative	-0.890562	0.793101	0.00128082	0.236739	0.62657	0.73933	0.80727	0.37797	0.49702	0.06183	0.07538	0.70827	0.83137	0.146349	0.386471	0.170798	3.19834	0.824317	3.01767	2.56572	0.102382	0.131183
cg09316306	4	38807337	TLR1	0.851214	0.400296	-0.450918	0.0146245	0.467658	0.187437	2.40151	negative	-0.894897	0.80084	0.00111676	0.226293	0.7828	0.84291	0.88206	0.49209	0.66117	0.16281	0.10935	0.86994	0.87836	0.146349	0.386471	0.170798	3.19834	0.824317	3.01767	2.56572	0.102382	0.131183
cg22839308	4	38807259	TLR1	0.583486	0.245674	-0.337812	0.00697753	0.404441	0.187437	2.40151	negative	-0.866369	0.750596	0.00251417	0.297071	0.42781	0.64415	0.59974	0.32202	0.43376	0.0507	0.08814	0.63729	0.60844	0.146349	0.386471	0.170798	3.19834	0.824317	3.01767	2.56572	0.102382	0.131183
cg21775245	3	129407548	TMCC1	0.534752	0.280488	-0.254264	0.0261478	0.504096	2.58745	3.93591	negative	-0.838083	0.702383	0.0047823	0.361557	0.53766	0.51206	0.56567	0.23776	0.42757	0.11495	0.12955	0.43178	0.62659	3.19164	1.85097	1.95495	4.43908	1.86088	4.53916	4.90453	3.20885	2.73083
cg16567723	13	114202683	TMCO3	0.317518	0.688712	0.371194	0.0397874	0.528398	62.8904	49.4663	negative	-0.8761	0.767551	0.00194885	0.272198	0.36026	0.30851	0.34445	0.80296	0.62384	0.91794	0.86579	0.30489	0.26948	65.3354	59.5414	66.8903	52.9803	59.7584	44.1863	40.9404	62.2709	60.414
cg09715768	13	114202537	TMCO3	0.415464	0.655666	0.240202	0.0436119	0.536779	62.8904	49.4663	negative	-0.896118	0.803027	0.00107334	0.222201	0.39522	0.49117	0.41652	0.76707	0.58364	0.79214	0.7782	0.40756	0.36685	65.3354	59.5414	66.8903	52.9803	59.7584	44.1863	40.9404	62.2709	60.414
cg24121069	13	114202741	TMCO3	0.325918	0.721952	0.396034	0.0481621	0.544529	62.8904	49.4663	negative	-0.891119	0.794094	0.00125884	0.235079	0.35164	0.35971	0.34487	0.92356	0.54535	0.95869	0.93641	0.32304	0.25033	65.3354	59.5414	66.8903	52.9803	59.7584	44.1863	40.9404	62.2709	60.414
cg22923006	13	114150139	TMCO3	0.169844	0.358712	0.188868	0.00042585	0.173401	62.8904	49.4663	negative	-0.874333	0.764458	0.0020442	0.2764	0.1768	0.16247	0.17085	0.34113	0.28637	0.38657	0.36578	0.19337	0.14573	65.3354	59.5414	66.8903	52.9803	59.7584	44.1863	40.9404	62.2709	60.414
cg14534144	13	114150007	TMCO3	0.040552	0.259788	0.219236	0.0121705	0.452616	62.8904	49.4663	negative	-0.84879	0.720444	0.00380573	0.341892	0.01746	0.03953	0.04533	0.24479	0.11938	0.31795	0.19775	0.06508	0.03536	65.3354	59.5414	66.8903	52.9803	59.7584	44.1863	40.9404	62.2709	60.414
cg04089246	7	47579217	TNS3	0.090986	0.403044	0.312058	0.0317677	0.514349	43.1655	23.6236	negative	-0.869455	0.755953	0.00232405	0.286194	0.09278	0.06739	0.06832	0.57179	0.24794	0.50645	0.59315	0.18284	0.0436	48.3445	39.093	37.8022	22.7007	45.7989	11.5795	14.4153	46.3056	44.282
cg25835019	7	47579243	TNS3	0.078658	0.313064	0.234406	0.0278252	0.506804	43.1655	23.6236	negative	-0.856457	0.733519	0.00319711	0.324271	0.09398	0.05968	0.06756	0.41722	0.22962	0.4766	0.36153	0.13959	0.03248	48.3445	39.093	37.8022	22.7007	45.7989	11.5795	14.4153	46.3056	44.282
cg05917713	6	42264793	TRERF1	0.429268	0.87824	0.448972	1.506e-07	0.0161887	5.32082	3.12848	negative	-0.931896	0.86843	0.00025382	0.135447	0.44395	0.35639	0.44592	0.85628	0.84145	0.91361	0.88083	0.43913	0.46095	5.99794	5.52033	5.10548	3.26116	2.98149	3.66822	2.60307	5.0141	4.96624
cg21669966	6	42224838	TRERF1	0.243882	0.589032	0.34515	0.00570256	0.384558	5.32082	3.12848	negative	-0.951441	0.90524	7.921e-05	0.0803792	0.21141	0.21519	0.32293	0.73479	0.66633	0.53455	0.66358	0.22543	0.24445	5.99794	5.52033	5.10548	3.26116	2.98149	3.66822	2.60307	5.0141	4.96624
cg21155973	12	72916569	TRHDE	0.109255	0.433382	0.324127	0.0279381	0.507126	14.1817	3.19971	negative	-0.90229	0.814128	0.00216456	0.281035	0.11312		0.124	0.56509	0.35453	0.45091	0.68231	0.12986	0.07004	10.9468	16.2348	13.6221	2.48073	6.72359	1.51852	2.07602	17.3537	12.7513
cg24686236	5	14323412	TRIO	0.45749	0.737418	0.279928	0.0141644	0.465388	50.889	36.3808	negative	-0.855116	0.731223	0.00329834	0.327531	0.50582	0.39449	0.46933	0.87631	0.73632	0.79559	0.81055	0.5004	0.41741	49.5392	48.9551	51.68	38.5896	35.8941	29.0704	41.969	49.533	54.7378
cg09828761	5	14450568	TRIO	0.275382	0.705108	0.429726	0.0107226	0.44189	50.889	36.3808	negative	-0.903874	0.816987	0.00082449	0.20124	0.28424	0.38169	0.27058	0.87504	0.66377	0.86681	0.78773	0.23381	0.20659	49.5392	48.9551	51.68	38.5896	35.8941	29.0704	41.969	49.533	54.7378
cg12294026	5	14452155	TRIO	0.261466	0.55636	0.294894	0.00249043	0.306381	50.889	36.3808	negative	-0.926834	0.859021	0.00032458	0.148873	0.29344	0.29898	0.26466	0.48981	0.67671	0.56727	0.40406	0.2562	0.19405	49.5392	48.9551	51.68	38.5896	35.8941	29.0704	41.969	49.533	54.7378
cg15612947	5	14464064	TRIO	0.130712	0.453862	0.32315	0.0225417	0.496468	50.889	36.3808	negative	-0.845942	0.715618	0.00405063	0.348141	0.17436	0.12575	0.12566	0.51672	0.29312	0.65795	0.60986	0.1439	0.08389	49.5392	48.9551	51.68	38.5896	35.8941	29.0704	41.969	49.533	54.7378
cg02705758	5	14449498	TRIO	0.067192	0.462964	0.395772	0.0236258	0.498893	50.889	36.3808	negative	-0.884129	0.781683	0.00155413	0.251231	0.08516	0.07081	0.07324	0.63365	0.29868	0.73008	0.53072	0.06482	0.04193	49.5392	48.9551	51.68	38.5896	35.8941	29.0704	41.969	49.533	54.7378
cg16396309	5	14210840	TRIO	0.151352	0.565136	0.413784	0.00105147	0.234849	50.889	36.3808	negative	-0.939064	0.88184	0.00017322	0.116237	0.19657	0.20029	0.14366	0.66959	0.57274	0.68651	0.52846	0.1019	0.11434	49.5392	48.9551	51.68	38.5896	35.8941	29.0704	41.969	49.533	54.7378
cg25585967	5	14452105	TRIO	0.280724	0.756268	0.475544	0.0009214	0.224742	50.889	36.3808	negative	-0.923136	0.852179	0.0003843	0.156967	0.28709	0.30834	0.2671	0.81959	0.83203	0.76046	0.53582	0.28757	0.25352	49.5392	48.9551	51.68	38.5896	35.8941	29.0704	41.969	49.533	54.7378
cg10603290	5	14154788	TRIO	0.169324	0.608356	0.439032	0.0448172	0.539363	50.889	36.3808	negative	-0.839709	0.705112	0.00462403	0.359312	0.19838	0.21014	0.17441	0.75719	0.40297	0.90912	0.8623	0.15844	0.10525	49.5392	48.9551	51.68	38.5896	35.8941	29.0704	41.969	49.533	54.7378
cg14755699	2	239791753	TWIST2	0.141614	0.558926	0.417312	0.0352303	0.519042	30.6374	18.0086	negative	-0.855856	0.732489	0.00324223	0.326182	0.17061	0.19558	0.14492	0.76817	0.22931	0.73302	0.82973	0.10596	0.091	30.0895	27.6724	29.7036	5.44314	50.0763	7.7812	8.73382	33.7821	31.9392
cg25943661	11	122662714	UBASH3B	0.099704	0.391564	0.29186	0.0302036	0.511075	15.4105	5.67273	negative	-0.872231	0.760787	0.00216176	0.281029	0.09454	0.12531	0.12237	0.38167	0.28432	0.57918	0.59124	0.09527	0.06103	18.1116	14.4094	18.5236	5.60511	8.4049	2.22623	6.45468	13.1123	12.8957
cg20595198	11	122679695	UBASH3B	0.13138	0.48762	0.35624	0.0331279	0.516336	15.4105	5.67273	negative	-0.892082	0.79581	0.00122152	0.232608	0.14316	0.137	0.15022	0.72137	0.3196	0.72413	0.51766	0.12278	0.10374	18.1116	14.4094	18.5236	5.60511	8.4049	2.22623	6.45468	13.1123	12.8957
cg22145318	7	129516344	UBE2H	0.906776	0.701424	-0.205352	0.0479115	0.543902	39.9421	61.0832	negative	-0.867205	0.752045	0.00246164	0.294345	0.92454	0.88388	0.88143	0.6218	0.84546	0.52042	0.61721	0.92555	0.91848	38.7346	56.8031	34.5673	69.1599	47.2906	71.9389	55.9433	30.2099	39.3954
cg23891364	1	1207789	UBE2J2	0.460356	0.61948	0.159124	0.00598282	0.389929	26.8463	20.2728	negative	-0.856039	0.732803	0.00322842	0.325533	0.47829	0.44742	0.44887	0.68113	0.51894	0.68734	0.62151	0.47533	0.45187	25.6826	23.2121	31.4054	20.5211	24.6981	16.423	19.449	27.3015	26.6298
cg10308265	17	42290028	UBTF	0.678964	0.841934	0.16297	0.00298934	0.322058	25.485	19.0399	negative	-0.839054	0.704012	0.00468737	0.360194	0.7114	0.75654	0.64923	0.85087	0.88832	0.79589	0.82831	0.58027	0.69738	24.0683	16.7846	31.7166	21.8901	16.9491	20.8988	16.4216	29.686	25.1697
cg10588705	17	20903244	USP22	0.151934	0.397792	0.245858	0.022374	0.496186	80.9718	60.0427	negative	-0.841678	0.708423	0.00443726	0.353807	0.26174	0.11805	0.13723	0.5906	0.29097	0.45469	0.468	0.16688	0.07577	75.6448	74.928	77.8959	64.1559	66.3385	56.2349	53.4417	86.1928	90.1973
cg10779317	17	20947650	USP22	0.144038	0.52864	0.384602	0.023215	0.497815	80.9718	60.0427	negative	-0.865691	0.749421	0.00255734	0.299064	0.14416	0.18364	0.17714	0.7469	0.24893	0.70165	0.66586	0.11481	0.10044	75.6448	74.928	77.8959	64.1559	66.3385	56.2349	53.4417	86.1928	90.1973
cg26457890	16	4427428	VASN	0.156662	0.564478	0.407816	0.0120281	0.452079	81.5946	38.93	negative	-0.851226	0.724586	0.00360438	0.337083	0.18933	0.19739	0.15417	0.67444	0.43272	0.66961	0.78812	0.15451	0.08791	59.7849	84.3705	67.5528	25.6437	49.02	37.4346	43.6216	102.789	93.4756
cg10313625	3	11763067	VGLL4	0.702438	0.418754	-0.283684	0.0191196	0.487198	13.7809	27.4351	negative	-0.849243	0.721213	0.00376773	0.341166	0.70535	0.64031	0.69404	0.31615	0.5293	0.2932	0.28005	0.66415	0.80834	14.825	19.1205	9.50534	24.0316	23.9914	36.0761	25.6411	11.345	14.1087
cg17553677	3	11674707	VGLL4	0.831558	0.493572	-0.337986	0.0179239	0.483741	13.7809	27.4351	negative	-0.855287	0.731516	0.00328529	0.327102	0.84654	0.84302	0.77838	0.40274	0.72348	0.2645	0.39862	0.83009	0.85976	14.825	19.1205	9.50534	24.0316	23.9914	36.0761	25.6411	11.345	14.1087
cg21837069	1	1369466	VWA1	0.287824	0.499452	0.211628	0.00593343	0.389136	3.42409	0.902209	negative	-0.867787	0.753054	0.00242558	0.291725	0.35784	0.36582	0.24581	0.51964	0.39618	0.61163	0.57494	0.26187	0.20778	1.03324	3.04639	4.08704	1.01162	1.06405	0.512955	1.02021	4.42121	4.53258
cg02298472	3	55513773	WNT5A	0.058742	0.489246	0.430504	0.0423225	0.533801	233.889	66.8472	negative	-0.932151	0.868906	0.00025057	0.135029	0.10145	0.05329	0.06952	0.47463	0.29431	0.86359	0.75247	0.05226	0.01719	239.513	280.946	212.716	34.4434	211.536	2.81353	18.5959	193.377	242.893
cg20741319	3	55511693	WNT5A	0.15714	0.615578	0.458438	0.0382712	0.524808	233.889	66.8472	negative	-0.912285	0.832265	0.00060348	0.181342	0.38206	0.15119	0.0978	0.8359	0.40951	0.87517	0.85455	0.08156	0.07309	239.513	280.946	212.716	34.4434	211.536	2.81353	18.5959	193.377	242.893
cg22143766	3	55514421	WNT5A	0.09078	0.428516	0.337736	0.0451332	0.539771	233.889	66.8472	negative	-0.945767	0.894475	0.00011597	0.0953728	0.1942	0.02725	0.05576	0.55072	0.24713	0.75881	0.50636	0.14079	0.0359	239.513	280.946	212.716	34.4434	211.536	2.81353	18.5959	193.377	242.893
cg13787933	3	141151009	ZBTB38	0.133466	0.654582	0.521116	0.0191891	0.48738	32.2375	23.3003	negative	-0.859936	0.73949	0.0029445	0.31466	0.27967	0.08461	0.08278	0.88331	0.45284	0.89182	0.85704	0.17515	0.04512	32.0297	33.8447	37.7143	24.0244	28.1092	21.9183	19.1493	26.1051	31.4938
cg09451235	16	67433458	ZDHHC1	0.411616	0.17408	-0.237536	0.0127279	0.456935	2.02776	4.11896	negative	-0.881994	0.777914	0.00165306	0.256782	0.30589	0.36965	0.45218	0.12527	0.28293	0.02942	0.08765	0.51937	0.41099	2.07313	2.84382	1.7016	2.82978	2.96841	5.35444	5.3232	1.56185	1.95838
cg16219266	16	67433184	ZDHHC1	0.58369	0.333474	-0.250216	0.00169544	0.270938	2.02776	4.11896	negative	-0.862492	0.743893	0.00276787	0.308575	0.50405	0.53002	0.59416	0.28975	0.40319	0.27307	0.24024	0.65836	0.63186	2.07313	2.84382	1.7016	2.82978	2.96841	5.35444	5.3232	1.56185	1.95838
cg04362711	16	88564247	ZFPM1	0.703926	0.427684	-0.276242	0.0277632	0.506724	1.3498	3.48464	negative	-0.839957	0.705527	0.00460029	0.35848	0.71223	0.7357	0.70473	0.31416	0.68874	0.27493	0.29346	0.61005	0.75692	0.979835	1.04906	1.11559	3.1312	1.03864	6.51658	3.25216	1.72214	1.88236
cg20154222	8	106626898	ZFPM2	0.846128	0.653744	-0.192384	0.0251186	0.50288	1.1022	11.2667	negative	-0.939865	0.883347	0.0001655	0.114422	0.86208	0.84902	0.78961	0.62347	0.7146	0.5338	0.55516	0.86579	0.86414	0.569823	0.693313	1.88366	9.56692	2.85137	19.4706	13.1781	0.571573	1.79264
cg00401433	8	106674239	ZFPM2	0.891104	0.394994	-0.49611	0.0252126	0.503123	1.1022	11.2667	negative	-0.920759	0.847797	0.0004265	0.161901	0.88737	0.84865	0.8931	0.20673	0.54748	0.09621	0.23883	0.85973	0.96667	0.569823	0.693313	1.88366	9.56692	2.85137	19.4706	13.1781	0.571573	1.79264
cg12797828	8	106520928	ZFPM2	0.823552	0.415022	-0.40853	0.0122426	0.453168	1.1022	11.2667	negative	-0.899227	0.808609	0.00096807	0.213067	0.803	0.81362	0.78603	0.27615	0.51459	0.22937	0.30758	0.82594	0.88917	0.569823	0.693313	1.88366	9.56692	2.85137	19.4706	13.1781	0.571573	1.79264
cg10450897	8	106605031	ZFPM2	0.65974	0.355334	-0.304406	0.047825	0.54366	1.1022	11.2667	negative	-0.960545	0.922646	3.865e-05	0.0613462	0.75014	0.71744	0.58017	0.34138	0.46106	0.08193	0.18336	0.63882	0.61213	0.569823	0.693313	1.88366	9.56692	2.85137	19.4706	13.1781	0.571573	1.79264
cg20988565	8	106334333	ZFPM2	0.871882	0.523102	-0.34878	0.0372723	0.523365	1.1022	11.2667	negative	-0.849229	0.72119	0.00376885	0.341173	0.83963	0.86269	0.88577	0.28772	0.72447	0.43782	0.30884	0.85795	0.91337	0.569823	0.693313	1.88366	9.56692	2.85137	19.4706	13.1781	0.571573	1.79264
cg04086531	16	49732376	ZNF423	0.952558	0.418674	-0.533884	0.0248084	0.502452	0.0534116	2.60221	negative	-0.849341	0.721381	0.00375947	0.3411	0.93994	0.93782	0.95018	0.2469	0.58198	0.05915	0.27691	0.95774	0.97711	0.0167667	0.00824058	0.0572565	0.85582	0.816688	5.50029	3.23606	0.0672802	0.117514
cg14936460	18	74175592	ZNF516	0.435	0.729682	0.294682	0.0476298	0.543259	18.7661	7.06768	negative	-0.836728	0.700113	0.00491702	0.365458	0.63967	0.45566	0.33237	0.89034	0.57444	0.92993	0.85495	0.47089	0.27641	16.0672	15.0054	17.3199	5.98418	7.98429	6.48154	7.82069	23.4496	21.9884
cg19951409	18	74175071	ZNF516	0.325562	0.655598	0.330036	0.00922707	0.431019	18.7661	7.06768	negative	-0.930845	0.866472	0.00026752	0.138518	0.501	0.37944	0.29079	0.737	0.63432	0.7415	0.79143	0.31427	0.14231	16.0672	15.0054	17.3199	5.98418	7.98429	6.48154	7.82069	23.4496	21.9884
cg16619858	18	74175194	ZNF516	0.20137	0.399476	0.198106	0.0162012	0.476228	18.7661	7.06768	negative	-0.977853	0.956197	5.209e-06	0.027255	0.27912	0.23503	0.21888	0.47432	0.40269	0.46183	0.46545	0.15239	0.12143	16.0672	15.0054	17.3199	5.98418	7.98429	6.48154	7.82069	23.4496	21.9884
cg06168404	18	74170545	ZNF516	0.13418	0.5465	0.41232	0.0436986	0.537087	18.7661	7.06768	negative	-0.847696	0.718589	0.00389854	0.344775	0.24348	0.14246	0.12603	0.75332	0.25312	0.81725	0.7644	0.09018	0.06875	16.0672	15.0054	17.3199	5.98418	7.98429	6.48154	7.82069	23.4496	21.9884
cg06807726	18	74090695	ZNF516	0.426282	0.654558	0.228276	0.0371888	0.523272	18.7661	7.06768	negative	-0.866719	0.751201	0.00249212	0.295862	0.59256	0.44137	0.41087	0.82052	0.80918	0.6651	0.53813	0.3078	0.37881	16.0672	15.0054	17.3199	5.98418	7.98429	6.48154	7.82069	23.4496	21.9884
cg22444102	18	74175208	ZNF516	0.210732	0.479856	0.269124	0.0069811	0.404441	18.7661	7.06768	negative	-0.895241	0.801456	0.00110441	0.226293	0.29713	0.23037	0.1784	0.60854	0.37332	0.52321	0.58483	0.217	0.13076	16.0672	15.0054	17.3199	5.98418	7.98429	6.48154	7.82069	23.4496	21.9884
cg13213527	18	74175651	ZNF516	0.16227	0.574968	0.412698	0.0275577	0.506134	18.7661	7.06768	negative	-0.841543	0.708195	0.00444989	0.353807	0.31598	0.12304	0.11762	0.74891	0.32084	0.81919	0.76561	0.16201	0.0927	16.0672	15.0054	17.3199	5.98418	7.98429	6.48154	7.82069	23.4496	21.9884
cg23483081	18	74173903	ZNF516	0.628172	0.834146	0.205974	0.00458639	0.362289	18.7661	7.06768	negative	-0.925102	0.855813	0.00035167	0.151636	0.76284	0.68838	0.54274	0.86386	0.85586	0.8802	0.82818	0.57497	0.57193	16.0672	15.0054	17.3199	5.98418	7.98429	6.48154	7.82069	23.4496	21.9884
cg21128539	18	74116273	ZNF516	0.606184	0.828044	0.22186	0.00567871	0.384271	18.7661	7.06768	negative	-0.917125	0.841118	0.00049717	0.168201	0.71788	0.66052	0.57623	0.78939	0.83138	0.87401	0.86608	0.4467	0.62959	16.0672	15.0054	17.3199	5.98418	7.98429	6.48154	7.82069	23.4496	21.9884
cg20132820	18	74167981	ZNF516	0.276982	0.701506	0.424524	0.0146844	0.467977	18.7661	7.06768	negative	-0.90438	0.817904	0.00080979	0.200289	0.39664	0.39602	0.1888	0.84997	0.51835	0.89179	0.89076	0.25706	0.14639	16.0672	15.0054	17.3199	5.98418	7.98429	6.48154	7.82069	23.4496	21.9884
cg03862651	18	74091787	ZNF516	0.446308	0.66443	0.218122	0.0445887	0.539072	18.7661	7.06768	negative	-0.836252	0.699317	0.00496493	0.367048	0.53714	0.4977	0.4367	0.76688	0.45998	0.8139	0.78685	0.33173	0.42827	16.0672	15.0054	17.3199	5.98418	7.98429	6.48154	7.82069	23.4496	21.9884
cg19277926	18	74175020	ZNF516	0.40414	0.691532	0.287392	0.00679692	0.40122	18.7661	7.06768	negative	-0.890761	0.793455	0.00127295	0.236142	0.57486	0.45166	0.35145	0.74097	0.5539	0.81578	0.80461	0.36842	0.27431	16.0672	15.0054	17.3199	5.98418	7.98429	6.48154	7.82069	23.4496	21.9884
cg22079685	18	74175082	ZNF516	0.26835	0.654672	0.386322	0.00415603	0.353623	18.7661	7.06768	negative	-0.962115	0.925666	3.358e-05	0.0570802	0.36903	0.39751	0.20497	0.76473	0.64078	0.78388	0.72087	0.23469	0.13555	16.0672	15.0054	17.3199	5.98418	7.98429	6.48154	7.82069	23.4496	21.9884
cg25872816	18	74168914	ZNF516	0.284624	0.703528	0.418904	0.0241701	0.500874	18.7661	7.06768	negative	-0.942602	0.888498	0.00014099	0.107136	0.39463	0.30681	0.2618	0.82116	0.74562	0.87118	0.8576	0.27759	0.18229	16.0672	15.0054	17.3199	5.98418	7.98429	6.48154	7.82069	23.4496	21.9884
cg15491120	18	74156897	ZNF516	0.188694	0.488844	0.30015	0.0142293	0.465581	18.7661	7.06768	negative	-0.866845	0.75142	0.00248418	0.295433	0.25524	0.19928	0.1704	0.63876	0.34705	0.68511	0.46949	0.2079	0.11065	16.0672	15.0054	17.3199	5.98418	7.98429	6.48154	7.82069	23.4496	21.9884
cg04293891	19	53239200	ZNF611	0.162334	0.336228	0.173894	0.011347	0.447859	2.53028	1.99425	negative	-0.838295	0.702739	0.00476147	0.361449	0.18889	0.16704	0.16012	0.43576	0.2513	0.37322	0.3966	0.18323	0.11239	2.35785	2.26288	2.88272	1.7627	2.21344	1.98819	2.01265	2.68479	2.46316
cg18568872	15	90606494	ZNF710	0.173148	0.452624	0.279476	1.219e-07	0.0161887	6.20775	3.91737	negative	-0.844119	0.712536	0.00421305	0.350854	0.18679	0.20736	0.17125	0.42211	0.48086	0.43092	0.47367	0.15672	0.14362	5.15962	5.88651	5.83379	4.11994	4.47564	2.76044	4.31348	6.90659	7.25222
cg19601144	15	90614743	ZNF710	0.1399	0.294168	0.154268	0.0210147	0.493155	6.20775	3.91737	negative	-0.949754	0.902032	8.912e-05	0.0849453	0.17746	0.17218	0.13806	0.32663	0.21955	0.43128	0.3114	0.11088	0.10092	5.15962	5.88651	5.83379	4.11994	4.47564	2.76044	4.31348	6.90659	7.25222
cg16483033	17	1090441	ABR	0.184842	0.373828	0.188986	0.0264666	0.504772	13.1163	18.9298	positive	0.962508	0.926421	3.239e-05	0.056165	0.21664	0.20415	0.19162	0.53339	0.2356	0.41482	0.43077	0.17791	0.13389	11.9078	14.3073	14.4922	21.8453	14.9661	20.041	18.8668	12.6827	12.1917
cg24187645	3	140959388	ACPL2	0.075248	0.279366	0.204118	0.0384882	0.52544	0.995044	3.73868	positive	0.875831	0.76708	0.00196315	0.272613	0.08951	0.08478	0.07228	0.23553	0.19402	0.45845	0.41054	0.08572	0.04395	1.0478	0.676192	0.738458	4.65649	1.24164	4.38515	4.67142	1.23202	1.28075
cg18685879	3	141012746	ACPL2	0.083614	0.425778	0.342164	0.00742413	0.410234	0.995044	3.73868	positive	0.949495	0.90154	9.072e-05	0.0854777	0.12212	0.10047	0.07261	0.5928	0.2849	0.50577	0.51247	0.07587	0.047	1.0478	0.676192	0.738458	4.65649	1.24164	4.38515	4.67142	1.23202	1.28075
cg26435172	1	4736126	AJAP1	0.570944	0.408984	-0.16196	0.0297447	0.510001	4.25176	0.375335	positive	0.904325	0.817804	0.00081138	0.200289	0.70011	0.38957	0.59315	0.40054	0.42855	0.33318	0.3744	0.5943	0.57759	8.18343	0.583342	3.82272	1.00733	0	0.457537	0.036473	6.45863	2.21066
cg26231761	1	4744796	AJAP1	0.6528	0.483864	-0.168936	0.0452932	0.540272	4.25176	0.375335	positive	0.873563	0.763112	0.00208673	0.278458	0.76433	0.48772	0.66167	0.52452	0.3814	0.41837	0.41551	0.66299	0.68729	8.18343	0.583342	3.82272	1.00733	0	0.457537	0.036473	6.45863	2.21066
cg00562969	1	4815872	AJAP1	0.62152	0.354618	-0.266902	0.00974201	0.433439	4.25176	0.375335	positive	0.89189	0.795468	0.00122888	0.232979	0.72472	0.45759	0.63455	0.44939	0.27958	0.30623	0.20175	0.71711	0.57363	8.18343	0.583342	3.82272	1.00733	0	0.457537	0.036473	6.45863	2.21066
cg26978611	6	90271866	ANKRD6	0.24291	0.611462	0.368552	0.0233409	0.498216	0.121703	4.97483	positive	0.889034	0.790382	0.00134243	0.240323	0.27928	0.23085	0.25178	0.71034	0.49698	0.81707	0.77397	0.24467	0.20797	0.180956	0.0777841	0.116748	2.37553	1.47413	9.44143	6.60822	0.0988468	0.134179
cg07618462	5	142499847	ARHGAP26	0.684305	0.837566	0.153261	0.0100285	0.436266	0.675617	1.59078	positive	0.883208	0.780056	0.00364202	0.337469	0.59894		0.72985	0.87354	0.79897	0.88644	0.89977	0.71754	0.69089	0.448196	0.773408	0.489976	1.18867	1.39875	1.92443	1.85128	1.01861	0.647897
cg05400732	3	57032141	ARHGEF3	0.27532	0.502988	0.227668	0.0165495	0.477628	1.11087	4.56845	positive	0.914811	0.83688	0.00054619	0.174708	0.34986	0.38716	0.25311	0.68045	0.52096	0.4822	0.5272	0.22386	0.16261	1.3114	1.59562	1.20478	7.05214	4.34883	4.17696	2.69588	0.650199	0.792359
cg08310581	2	131797438	ARHGEF4	0.4233	0.707322	0.284022	0.0421368	0.533372	0.5593	4.01964	positive	0.879342	0.773242	0.001782	0.264684	0.488	0.50111	0.38628	0.79263	0.48582	0.9603	0.83246	0.43183	0.30928	1.22032	0.198062	0.403004	1.68496	1.45248	7.49259	5.44853	0.55372	0.421396
cg26382586	2	131797606	ARHGEF4	0.373852	0.5649	0.191048	0.0085234	0.424696	0.5593	4.01964	positive	0.863386	0.745436	0.00270789	0.306035	0.41272	0.4105	0.3485	0.5958	0.48081	0.6705	0.63329	0.38946	0.30808	1.22032	0.198062	0.403004	1.68496	1.45248	7.49259	5.44853	0.55372	0.421396
cg08393937	5	78277492	ARSB	0.10801	0.354222	0.246212	0.0428374	0.534805	10.2211	15.5751	positive	0.851717	0.725422	0.00356472	0.336822	0.09663	0.12715	0.12704	0.53321	0.24941	0.3215	0.55516	0.12621	0.06302	10.0403	9.7217	11.0306	13.5586	12.7586	15.8373	20.1459	9.73994	10.573
cg27361227	5	78126647	ARSB	0.14136	0.32793	0.18657	0.00441261	0.358306	10.2211	15.5751	positive	0.883773	0.781054	0.00157034	0.251636	0.19524	0.15279	0.17766	0.31971	0.30845	0.40047	0.40942	0.09432	0.08679	10.0403	9.7217	11.0306	13.5586	12.7586	15.8373	20.1459	9.73994	10.573
cg14388093	9	133342842	ASS1	0.270638	0.659294	0.388656	0.00305111	0.32469	18.8546	61.9045	positive	0.910939	0.82981	0.00063567	0.184639	0.31307	0.27232	0.26205	0.56673	0.74134	0.72474	0.44995	0.29977	0.20598	15.831	26.5745	16.1427	35.7117	93.8731	94.8607	23.1725	17.4381	18.2867
cg24199463	13	113407479	ATP11A	0.188674	0.379506	0.190832	0.0301746	0.511075	5.26886	11.0742	positive	0.884815	0.782897	0.00152321	0.25012	0.23614	0.23433	0.18906	0.44524	0.24701	0.50706	0.47635	0.20272	0.08112	4.60375	4.46004	5.67737	11.8027	7.74628	15.0124	9.73538	6.96448	4.63868
cg07296256	13	113438010	ATP11A	0.143138	0.38146	0.238322	0.0283013	0.507815	5.26886	11.0742	positive	0.878535	0.771824	0.00182255	0.266892	0.16059	0.23219	0.15934	0.55174	0.31536	0.51894	0.377	0.07903	0.08454	4.60375	4.46004	5.67737	11.8027	7.74628	15.0124	9.73538	6.96448	4.63868
cg11218330	13	113437795	ATP11A	0.180128	0.517326	0.337198	0.0496486	0.546748	5.26886	11.0742	positive	0.919938	0.846286	0.00044181	0.163157	0.19792	0.26559	0.19901	0.75179	0.31293	0.80425	0.5478	0.09074	0.14738	4.60375	4.46004	5.67737	11.8027	7.74628	15.0124	9.73538	6.96448	4.63868
cg04656015	13	113407548	ATP11A	0.275376	0.447872	0.172496	0.00810033	0.419298	5.26886	11.0742	positive	0.921865	0.849835	0.00040648	0.160321	0.30014	0.32534	0.25873	0.51452	0.34956	0.54686	0.46399	0.29035	0.20232	4.60375	4.46004	5.67737	11.8027	7.74628	15.0124	9.73538	6.96448	4.63868
cg16762784	13	113520805	ATP11A	0.638688	0.794836	0.156148	0.00891976	0.428542	5.26886	11.0742	positive	0.87867	0.77206	0.00181576	0.26649	0.65038	0.64975	0.64995	0.8149	0.82365	0.86654	0.80608	0.64082	0.60254	4.60375	4.46004	5.67737	11.8027	7.74628	15.0124	9.73538	6.96448	4.63868
cg01382105	13	113406866	ATP11A	0.314184	0.69322	0.379036	0.0477303	0.543549	5.26886	11.0742	positive	0.870486	0.757747	0.00226282	0.285158	0.33326	0.44591	0.29225	0.87097	0.30308	0.9593	0.90859	0.31666	0.18284	4.60375	4.46004	5.67737	11.8027	7.74628	15.0124	9.73538	6.96448	4.63868
cg14381255	13	113437214	ATP11A	0.341738	0.674892	0.333154	0.00925904	0.431019	5.26886	11.0742	positive	0.864096	0.746662	0.00266091	0.303919	0.39074	0.39623	0.3209	0.78458	0.46932	0.80594	0.80306	0.263	0.33782	4.60375	4.46004	5.67737	11.8027	7.74628	15.0124	9.73538	6.96448	4.63868
cg10665616	7	69326361	AUTS2	0.247998	0.563456	0.315458	0.038086	0.524365	0.588	3.62641	positive	0.855257	0.731464	0.00328761	0.327102	0.3124	0.29547	0.29296	0.79225	0.41966	0.77154	0.59701	0.15771	0.18145	0.217798	0.540283	0.811312	3.30904	0.474574	6.38603	4.33599	0.334629	1.03598
cg15520052	7	69808286	AUTS2	0.572036	0.799494	0.227458	0.0163958	0.476799	0.588	3.62641	positive	0.836305	0.699406	0.00495954	0.366966	0.42084	0.48841	0.65609	0.86416	0.62453	0.86489	0.8917	0.56331	0.73153	0.217798	0.540283	0.811312	3.30904	0.474574	6.38603	4.33599	0.334629	1.03598
cg20399616	12	25055967	BCAT1	0.035702	0.45497	0.419268	0.018843	0.486717	17.276	56.255	positive	0.933461	0.871349	0.00023436	0.13234	0.04073	0.04197	0.03567	0.43314	0.38107	0.76118	0.59465	0.0397	0.02044	14.4167	12.5	13.6358	39.0488	30.2972	93.4623	62.2118	19.226	26.6016
cg23930313	12	25056083	BCAT1	0.04143	0.24284	0.20141	0.041306	0.532135	17.276	56.255	positive	0.937754	0.879383	0.00018635	0.120461	0.04252	0.04566	0.04503	0.15355	0.17022	0.40914	0.40102	0.04452	0.02942	14.4167	12.5	13.6358	39.0488	30.2972	93.4623	62.2118	19.226	26.6016
cg23792314	12	25056243	BCAT1	0.06971	0.271448	0.201738	0.0401169	0.529105	17.276	56.255	positive	0.957333	0.916486	5.067e-05	0.0679505	0.09834	0.08377	0.05265	0.17685	0.20973	0.48108	0.37468	0.06492	0.04887	14.4167	12.5	13.6358	39.0488	30.2972	93.4623	62.2118	19.226	26.6016
cg11459773	19	45262055	BCL3	0.473498	0.75824	0.284742	0.00060328	0.195702	6.91377	17.2304	positive	0.835918	0.698759	0.00499873	0.368125	0.50418	0.59754	0.46077	0.70735	0.66728	0.80196	0.86508	0.36351	0.44149	7.38726	6.15523	5.77009	18.3468	16.6587	17.3246	16.5915	7.86947	7.38678
cg09896131	22	18231825	BID	0.598386	0.75681	0.158424	0.0126695	0.456636	12.8065	16.212	positive	0.843031	0.710701	0.00431202	0.352487	0.60712	0.53326	0.60154	0.76799	0.90349	0.72911	0.67135	0.61559	0.63442	13.1236	12.5502	13.4487	18.3226	20.729	12.0319	13.7644	11.7979	13.1119
cg07992659	7	33961367	BMPER	0.072242	0.344192	0.27195	0.0355097	0.519747	2.36067	12.2812	positive	0.892645	0.796815	0.00120003	0.23143	0.06114	0.09037	0.09309	0.61537	0.18516	0.34144	0.44558	0.07963	0.03698	1.70574	2.00695	4.82077	24.492	7.64718	10.2065	6.77914	1.57671	1.6932
cg00174508	12	107774298	BTBD11	0.036336	0.25279	0.216454	0.0475756	0.543247	0.13321	2.58405	positive	0.885512	0.784131	0.00149226	0.249175	0.03256	0.04369	0.03174	0.55054	0.1975	0.22833	0.17048	0.04295	0.03074	0.0371416	0.0365277	0.222245	9.80622	0.100138	0.165165	0.264694	0.181691	0.188447
cg10455940	10	103213706	BTRC	0.049906	0.372878	0.322972	0.0217104	0.495233	5.60773	7.31991	positive	0.853079	0.727744	0.00345625	0.333173	0.08452	0.05273	0.04163	0.3654	0.29575	0.59675	0.51911	0.05543	0.01522	5.55603	5.25504	6.17387	7.08773	7.47314	8.03868	6.68011	5.30232	5.75141
cg25830307	10	77871644	C10orf11	0.263506	0.675278	0.411772	0.0286683	0.507979	0.152272	2.35509	positive	0.849003	0.720805	0.00378783	0.341806	0.40322	0.37275	0.20416	0.81996	0.46263	0.94966	0.85938	0.24905	0.08835	0.332134	0.160518	0.159212	4.37829	0.286729	2.84753	1.90783	0.0551105	0.0543853
cg16072382	10	78096093	C10orf11	0.424892	0.61011	0.185218	0.0327884	0.516215	0.152272	2.35509	positive	0.84491	0.713873	0.00414204	0.349994	0.45297	0.48354	0.46579	0.76868	0.48185	0.57154	0.73117	0.30093	0.42123	0.332134	0.160518	0.159212	4.37829	0.286729	2.84753	1.90783	0.0551105	0.0543853
cg04850999	10	77872084	C10orf11	0.074258	0.452272	0.378014	0.0382593	0.524808	0.152272	2.35509	positive	0.84077	0.706894	0.0045228	0.355839	0.10034	0.07668	0.06387	0.52598	0.23382	0.80768	0.57894	0.07447	0.05593	0.332134	0.160518	0.159212	4.37829	0.286729	2.84753	1.90783	0.0551105	0.0543853
cg26819718	10	77872170	C10orf11	0.066264	0.63492	0.568656	0.0173995	0.481882	0.152272	2.35509	positive	0.870012	0.756922	0.00229083	0.285674	0.10169	0.0779	0.07531	0.79528	0.39745	0.98263	0.80662	0.05964	0.01678	0.332134	0.160518	0.159212	4.37829	0.286729	2.84753	1.90783	0.0551105	0.0543853
cg14207539	10	77794591	C10orf11	0.173158	0.613584	0.440426	0.0220572	0.495506	0.152272	2.35509	positive	0.876363	0.768012	0.00193494	0.271769	0.26333	0.1794	0.15401	0.75801	0.3564	0.86258	0.81787	0.16984	0.09921	0.332134	0.160518	0.159212	4.37829	0.286729	2.84753	1.90783	0.0551105	0.0543853
cg23966017	10	78283676	C10orf11	0.120056	0.526298	0.406242	0.0299777	0.51057	0.152272	2.35509	positive	0.851196	0.724535	0.00360684	0.337083	0.1596	0.17772	0.11295	0.74274	0.2936	0.54927	0.84649	0.08888	0.06113	0.332134	0.160518	0.159212	4.37829	0.286729	2.84753	1.90783	0.0551105	0.0543853
cg05496768	10	77872288	C10orf11	0.386016	0.69069	0.304674	0.0211482	0.493372	0.152272	2.35509	positive	0.887108	0.786961	0.00142298	0.244533	0.43096	0.39558	0.35451	0.81058	0.5878	0.89567	0.73646	0.36103	0.388	0.332134	0.160518	0.159212	4.37829	0.286729	2.84753	1.90783	0.0551105	0.0543853
cg16935790	17	77043246	C1QTNF1	0.444626	0.749228	0.304602	0.0146819	0.467977	5.52208	44.9884	positive	0.899688	0.809439	0.00095309	0.21136	0.40507	0.4565	0.49159	0.87561	0.48178	0.86936	0.84103	0.41714	0.45283	3.44273	7.77228	6.19793	51.9797	9.86903	37.8296	80.2754	4.67957	5.5179
cg00193613	17	77042810	C1QTNF1	0.098928	0.504664	0.405736	0.00288988	0.319623	5.52208	44.9884	positive	0.911911	0.831582	0.0006123	0.182129	0.16111	0.07663	0.11729	0.64258	0.31521	0.54816	0.6415	0.08711	0.0525	3.44273	7.77228	6.19793	51.9797	9.86903	37.8296	80.2754	4.67957	5.5179
cg08821600	17	77042745	C1QTNF1	0.140824	0.431088	0.290264	0.0139809	0.464479	5.52208	44.9884	positive	0.949615	0.901769	8.997e-05	0.0854003	0.16663	0.17709	0.14284	0.51574	0.22626	0.51342	0.60074	0.12057	0.09699	3.44273	7.77228	6.19793	51.9797	9.86903	37.8296	80.2754	4.67957	5.5179
cg26211634	5	139558579	C5orf32	0.274142	0.631676	0.357534	0.0115599	0.44861	19.4481	50.0618	positive	0.851577	0.725183	0.00357603	0.336833	0.24081	0.32906	0.32945	0.78624	0.46851	0.74954	0.76894	0.22037	0.25102	18.6147	27.1306	19.7273	71.6782	37.7904	59.5603	31.2185	14.6987	17.0694
cg17284119	6	110644424	C6orf186	0.144938	0.446636	0.301698	0.0349572	0.518927	0	1.97456	positive	0.876469	0.768198	0.00192932	0.271671	0.21482	0.12798	0.14194	0.39103	0.29562	0.69281	0.65336	0.13883	0.10112	0	0	0	0.697763	0.355892	4.92678	1.91782	0	0
cg00455327	18	20714217	CABLES1	0.188876	0.555648	0.366772	0.0385639	0.525635	0.0981528	11.4278	positive	0.851362	0.724817	0.0035934	0.336922	0.28665	0.13105	0.20039	0.67588	0.33899	0.78497	0.78875	0.2101	0.11619	0.0974943	0.103381	0.0718883	7.65731	4.20287	23.9672	9.88363	0.0808346	0.137166
cg22158648	18	20713759	CABLES1	0.193588	0.516272	0.322684	0.0481664	0.544529	0.0981528	11.4278	positive	0.938028	0.879897	0.00018355	0.120461	0.32888	0.19027	0.14295	0.59499	0.37164	0.89092	0.53214	0.23011	0.07573	0.0974943	0.103381	0.0718883	7.65731	4.20287	23.9672	9.88363	0.0808346	0.137166
cg03505501	11	115371789	CADM1	0.78279	0.595978	-0.186812	0.0412879	0.532135	9.81788	2.53296	positive	0.857272	0.734915	0.00313666	0.322206	0.80771	0.84725	0.75843	0.73978	0.47575	0.48886	0.50916	0.68677	0.81379	11.9052	13.0025	4.57794	5.177	2.15631	1.37561	1.42294	9.93291	9.67085
cg10553088	11	115372912	CADM1	0.50998	0.2881	-0.22188	0.0126459	0.4562	9.81788	2.53296	positive	0.867127	0.751909	0.00246653	0.294532	0.69643	0.55652	0.39584	0.25744	0.21875	0.3072	0.276	0.50437	0.39674	11.9052	13.0025	4.57794	5.177	2.15631	1.37561	1.42294	9.93291	9.67085
cg14160433	9	138749560	CAMSAP1	0.48051	0.137742	-0.342768	0.0242269	0.501132	8.68733	7.50073	positive	0.884527	0.782388	0.00153612	0.2503	0.19206	0.28027	0.64519	0.11201	0.11383	0.12768	0.06731	0.6213	0.66373	6.95742	7.36475	9.97815	8.16164	6.69791	7.32046	7.82292	9.47039	9.66595
cg09736934	20	32232543	CBFA2T2	0.41643	0.714114	0.297684	0.00281888	0.316718	1.95228	3.07278	positive	0.85776	0.735753	0.00310079	0.321054	0.43583	0.50469	0.38903	0.82769	0.58919	0.79373	0.7828	0.40621	0.34639	2.09435	1.72362	1.84494	3.14459	1.88169	3.38779	3.87706	2.20027	1.89824
cg01021552	16	65046268	CDH11	0.05318	0.490468	0.437288	0.0264371	0.504772	37.8993	164.699	positive	0.93927	0.882229	0.0001712	0.116172	0.07945	0.04857	0.0827	0.70707	0.24252	0.78919	0.57338	0.03474	0.02044	31.7774	49.0824	44.1105	269.356	39.586	201.511	148.343	29.9503	34.5758
cg02966475	16	65105516	CDH11	0.100798	0.47157	0.370772	0.0372756	0.523365	37.8993	164.699	positive	0.944466	0.892016	0.00012584	0.100726	0.12461	0.11447	0.11281	0.71035	0.31423	0.71461	0.53273	0.08378	0.06832	31.7774	49.0824	44.1105	269.356	39.586	201.511	148.343	29.9503	34.5758
cg19617217	7	90581938	CDK14	0.216828	0.463568	0.24674	0.00249062	0.306381	8.14764	16.0235	positive	0.925418	0.856398	0.00034661	0.150204	0.21108	0.22816	0.26581	0.52902	0.36205	0.56439	0.50485	0.23628	0.14281	7.68931	7.59103	12.0731	19.6141	11.6388	19.5083	13.3329	6.58228	6.80249
cg16713168	16	80716710	CDYL2	0.885312	0.69291	-0.192402	0.0299749	0.51057	7.64733	2.25985	positive	0.920123	0.846627	0.00043832	0.16246	0.87941	0.90154	0.85582	0.66193	0.75455	0.56516	0.58945	0.84436	0.94543	6.68596	6.49123	8.26942	2.80968	4.14791	0.719488	1.36233	9.10191	7.68812
cg06698470	16	80654751	CDYL2	0.897242	0.746368	-0.150874	0.0267873	0.504957	7.64733	2.25985	positive	0.957077	0.915996	5.172e-05	0.0679594	0.87558	0.89182	0.87328	0.72662	0.7805	0.66353	0.65722	0.90241	0.94312	6.68596	6.49123	8.26942	2.80968	4.14791	0.719488	1.36233	9.10191	7.68812
cg10276834	7	136575360	CHRM2	0.748308	0.590026	-0.158282	0.0114185	0.447859	56.7078	5.18803	positive	0.913106	0.833763	0.00058442	0.179786	0.68614	0.80397	0.69936	0.57381	0.54864	0.55848	0.52644	0.75929	0.79278	44.6023	49.29	63.2695	2.87062	15.5883	0.315642	1.97754	54.9918	71.3855
cg05957190	12	105096609	CHST11	0.256362	0.58818	0.331818	0.0128269	0.457679	0.438885	2.34766	positive	0.893654	0.798618	0.00116219	0.228818	0.30588	0.4191	0.19802	0.79826	0.31247	0.6207	0.70448	0.18769	0.17112	0.369205	0.199123	0.340484	3.66381	0.65036	2.78225	2.29423	0.874573	0.411042
cg19047077	12	105044897	CHST11	0.319474	0.748618	0.429144	0.00327694	0.333367	0.438885	2.34766	positive	0.872279	0.760871	0.00215901	0.280999	0.32685	0.42093	0.28402	0.86549	0.66373	0.8995	0.82998	0.32166	0.24391	0.369205	0.199123	0.340484	3.66381	0.65036	2.78225	2.29423	0.874573	0.411042
cg08766256	16	81527504	CMIP	0.120632	0.324112	0.20348	0.0437497	0.537224	5.41066	10.7375	positive	0.882147	0.778184	0.00164583	0.256262	0.13379	0.12797	0.12941	0.39428	0.22173	0.48907	0.41204	0.13019	0.0818	5.8108	4.95278	4.39597	11.2119	6.86568	10.2723	14.6001	6.2596	5.63415
cg01425762	16	81666633	CMIP	0.071614	0.421406	0.349792	0.0272452	0.505579	5.41066	10.7375	positive	0.935318	0.874819	0.00021264	0.128595	0.06876	0.06428	0.0837	0.54114	0.23104	0.60671	0.60951	0.08167	0.05966	5.8108	4.95278	4.39597	11.2119	6.86568	10.2723	14.6001	6.2596	5.63415
cg03122201	16	81678804	CMIP	0.381828	0.744236	0.362408	0.00276779	0.315249	5.41066	10.7375	positive	0.904318	0.81779	0.0008116	0.200289	0.34583	0.29654	0.38426	0.80372	0.6004	0.88426	0.86443	0.53694	0.34557	5.8108	4.95278	4.39597	11.2119	6.86568	10.2723	14.6001	6.2596	5.63415
cg09742346	16	81527501	CMIP	0.111724	0.438838	0.327114	0.045741	0.540819	5.41066	10.7375	positive	0.910063	0.828215	0.00065724	0.187955	0.11464	0.11096	0.1104	0.49941	0.24351	0.707	0.63712	0.15416	0.06846	5.8108	4.95278	4.39597	11.2119	6.86568	10.2723	14.6001	6.2596	5.63415
cg06896529	16	81678968	CMIP	0.184512	0.616236	0.431724	0.0197318	0.489069	5.41066	10.7375	positive	0.908231	0.824883	0.00070401	0.19255	0.18716	0.16861	0.20899	0.62786	0.47541	0.87058	0.8502	0.22077	0.13703	5.8108	4.95278	4.39597	11.2119	6.86568	10.2723	14.6001	6.2596	5.63415
cg03766174	16	81547907	CMIP	0.25162	0.58392	0.3323	0.0141921	0.465388	5.41066	10.7375	positive	0.911312	0.83049	0.00062662	0.18395	0.27245	0.22122	0.29451	0.67298	0.36807	0.75583	0.71584	0.22956	0.24036	5.8108	4.95278	4.39597	11.2119	6.86568	10.2723	14.6001	6.2596	5.63415
cg06473941	16	81678907	CMIP	0.104296	0.527584	0.423288	0.0216396	0.494963	5.41066	10.7375	positive	0.904785	0.818636	0.00079818	0.199852	0.11069	0.06825	0.14894	0.52913	0.40509	0.77532	0.77094	0.11763	0.07597	5.8108	4.95278	4.39597	11.2119	6.86568	10.2723	14.6001	6.2596	5.63415
cg10155304	12	109107559	CORO1C	0.709448	0.374054	-0.335394	0.0445293	0.53887	243.234	149.029	positive	0.921309	0.84881	0.00041646	0.160686	0.72372	0.67463	0.71874	0.25269	0.58301	0.13674	0.18003	0.69948	0.73067	233.548	251.334	274.063	155.486	176.826	137.405	126.399	221.543	235.68
cg23729283	7	29040109	CPVL	0.37384	0.686228	0.312388	0.0482413	0.544716	0	2.80545	positive	0.906643	0.822002	0.00074637	0.196383	0.40857	0.45013	0.3645	0.78928	0.63029	0.87762	0.86204	0.34801	0.29799	0	0	0	4.10614	0.839087	3.96233	2.31426	0	0
cg11728747	7	29037910	CPVL	0.114056	0.342024	0.227968	0.0312536	0.513777	0	2.80545	positive	0.900187	0.810336	0.00093709	0.210379	0.19933	0.10323	0.09918	0.58926	0.23673	0.338	0.37985	0.12314	0.0454	0	0	0	4.10614	0.839087	3.96233	2.31426	0	0
cg05222850	7	137618712	CREB3L2	0.520284	0.322254	-0.19803	0.0230629	0.497694	28.3189	18.9575	positive	0.841481	0.70809	0.00445575	0.353807	0.44684	0.5997	0.43766	0.37747	0.18811	0.25263	0.27533	0.59012	0.5271	26.8283	27.141	30.3459	23.8376	19.2709	13.8799	18.8417	29.4236	27.8559
cg01831872	2	36682726	CRIM1	0.79449	0.538586	-0.255904	0.0406082	0.53016	398.289	242.324	positive	0.905067	0.819146	0.00079016	0.199373	0.78901	0.80296	0.75552	0.53907	0.62327	0.32464	0.39386	0.81727	0.80769	397.254	362.098	364.408	188.062	377.864	188.164	215.207	429.111	438.576
cg22661341	2	36753857	CRIM1	0.851436	0.654642	-0.196794	0.0419264	0.532929	398.289	242.324	positive	0.932327	0.869233	0.00024836	0.134865	0.82488	0.83612	0.80997	0.63408	0.74804	0.45374	0.58665	0.85934	0.92687	397.254	362.098	364.408	188.062	377.864	188.164	215.207	429.111	438.576
cg21449646	8	19465636	CSGALNACT1	0.624512	0.826298	0.201786	0.00722162	0.408402	0.128679	1.82241	positive	0.84383	0.71205	0.00423912	0.351047	0.63214	0.6486	0.58218	0.87978	0.89377	0.88603	0.81181	0.58613	0.67351	0.24294	0.0946574	0.083921	0.836433	2.04242	2.96378	1.44701	0.1797	0.0421786
cg09559798	10	126688792	CTBP2	0.744044	0.488592	-0.255452	0.049803	0.54706	26.9358	18.6918	positive	0.964713	0.930672	2.625e-05	0.0512788	0.75086	0.75006	0.70746	0.5006	0.59413	0.29055	0.28729	0.73001	0.78183	26.6393	25.0817	28.5924	21.6731	22.2495	16.1001	14.7446	25.8366	28.529
cg02307880	7	101566857	CUX1	0.078738	0.54033	0.461592	0.025373	0.503542	22.4543	50.3827	positive	0.867979	0.753387	0.00241374	0.290957	0.10681	0.0817	0.08363	0.54223	0.34639	0.85923	0.79821	0.07274	0.04881	23.2289	28.2946	20.0007	31.1329	39.7708	82.622	48.005	19.3221	21.4252
cg12802310	2	38304720	CYP1B1	0.10812	0.519004	0.410884	0.0152224	0.470872	0.134096	55.9579	positive	0.857798	0.735818	0.00309803	0.320977	0.14826	0.10816	0.0864	0.68867	0.31271	0.72269	0.63695	0.11975	0.07803	0.0938017	0.122964	0.312762	26.621	47.8496	80.528	68.8329	0.0235272	0.117426
cg26144569	2	38304804	CYP1B1	0.338354	0.674218	0.335864	0.00622999	0.393036	0.134096	55.9579	positive	0.895371	0.801689	0.00109974	0.225966	0.38475	0.39275	0.36164	0.74852	0.65713	0.81711	0.74339	0.20671	0.34592	0.0938017	0.122964	0.312762	26.621	47.8496	80.528	68.8329	0.0235272	0.117426
cg14159523	9	90185475	DAPK1	0.367932	0.720648	0.352716	4.853e-05	0.0844989	0.179965	17.4506	positive	0.899724	0.809504	0.00095193	0.21136	0.36789	0.39122	0.44082	0.65143	0.64509	0.71192	0.8066	0.29497	0.34476	0.222689	0.099557	0.151526	15.2341	6.09559	26.229	22.2439	0.0677141	0.35834
cg14250336	9	90195885	DAPK1	0.49981	0.810596	0.310786	0.00067195	0.202526	0.179965	17.4506	positive	0.894841	0.80074	0.00111877	0.226293	0.57862	0.61034	0.37812	0.82288	0.68778	0.86053	0.89197	0.50717	0.4248	0.222689	0.099557	0.151526	15.2341	6.09559	26.229	22.2439	0.0677141	0.35834
cg00219169	10	530951	DIP2C	0.592668	0.427738	-0.16493	0.0102173	0.437838	11.3673	7.85119	positive	0.884692	0.78268	0.00152871	0.25012	0.57299	0.59814	0.58197	0.39825	0.38453	0.40869	0.37246	0.59088	0.61936	11.1966	10.836	9.96968	6.32613	8.76775	8.04115	8.26972	12.3319	12.5025
cg13775636	10	711897	DIP2C	0.70087	0.472124	-0.228746	0.0144008	0.466483	11.3673	7.85119	positive	0.961018	0.923555	3.707e-05	0.0602171	0.69382	0.72428	0.64398	0.32556	0.49632	0.4037	0.46439	0.72346	0.71881	11.1966	10.836	9.96968	6.32613	8.76775	8.04115	8.26972	12.3319	12.5025
cg14072016	10	384652	DIP2C	0.788558	0.350472	-0.438086	0.0241037	0.500657	11.3673	7.85119	positive	0.891167	0.794178	0.00125699	0.234995	0.79053	0.79105	0.75185	0.21096	0.46859	0.10068	0.18906	0.80785	0.80151	11.1966	10.836	9.96968	6.32613	8.76775	8.04115	8.26972	12.3319	12.5025
cg15912031	10	639935	DIP2C	0.286812	0.126104	-0.160708	0.0191764	0.48738	11.3673	7.85119	positive	0.847419	0.718119	0.0039223	0.345463	0.3764	0.27447	0.22515	0.07791	0.11695	0.04486	0.09382	0.32521	0.23283	11.1966	10.836	9.96968	6.32613	8.76775	8.04115	8.26972	12.3319	12.5025
cg23681599	10	711944	DIP2C	0.78215	0.523296	-0.258854	0.0438749	0.537517	11.3673	7.85119	positive	0.838746	0.703496	0.00471731	0.360614	0.85043	0.76558	0.70147	0.34854	0.79512	0.37571	0.41323	0.80006	0.79321	11.1966	10.836	9.96968	6.32613	8.76775	8.04115	8.26972	12.3319	12.5025
cg17333886	10	711676	DIP2C	0.672324	0.435818	-0.236506	0.00442691	0.358576	11.3673	7.85119	positive	0.853355	0.728214	0.0034346	0.332401	0.76514	0.71794	0.60523	0.33278	0.38758	0.43181	0.41247	0.66693	0.60638	11.1966	10.836	9.96968	6.32613	8.76775	8.04115	8.26972	12.3319	12.5025
cg13859346	10	384506	DIP2C	0.902898	0.499958	-0.40294	0.0463735	0.54176	11.3673	7.85119	positive	0.839364	0.704533	0.0046573	0.359545	0.89843	0.89478	0.88567	0.34913	0.72035	0.11878	0.39568	0.90213	0.93348	11.1966	10.836	9.96968	6.32613	8.76775	8.04115	8.26972	12.3319	12.5025
cg26807432	10	712207	DIP2C	0.870636	0.59187	-0.278766	0.0455559	0.540819	11.3673	7.85119	positive	0.855348	0.73162	0.00328068	0.327102	0.87568	0.85911	0.85566	0.38914	0.83703	0.40893	0.51153	0.85948	0.90325	11.1966	10.836	9.96968	6.32613	8.76775	8.04115	8.26972	12.3319	12.5025
cg24429708	10	640061	DIP2C	0.410664	0.11755	-0.293114	0.0115274	0.448403	11.3673	7.85119	positive	0.879473	0.773473	0.00177545	0.264385	0.39831	0.42922	0.36486	0.08062	0.05692	0.01875	0.03833	0.47608	0.38485	11.1966	10.836	9.96968	6.32613	8.76775	8.04115	8.26972	12.3319	12.5025
cg26224781	7	95470778	DYNC1I1	0.373684	0.658144	0.28446	0.00643395	0.39615	0.320439	1.35807	positive	0.843589	0.711643	0.00426099	0.351376	0.39879	0.39369	0.41095	0.82923	0.5091	0.718	0.69524	0.29635	0.36864	0.53525	0.292146	0.592569	2.8493	0.406064	0.65726	1.51966	0.0992487	0.082981
cg06344553	10	131684893	EBF3	0.508238	0.315154	-0.193084	0.0442141	0.538191	1.6119	0.481068	positive	0.864142	0.746741	0.00265788	0.303919	0.49503	0.75945	0.44789	0.24114	0.42162	0.32238	0.4009	0.4535	0.38532	0.679136	3.60185	0.907384	0.08631	1.73426	0	0.103702	1.49303	1.37809
cg00379467	4	148401873	EDNRA	0.086338	0.307752	0.221414	0.0225014	0.496468	0.175739	2.36707	positive	0.859875	0.739384	0.00294882	0.314815	0.0947	0.10103	0.091	0.45305	0.21055	0.37686	0.37959	0.08586	0.0591	0.224909	0.16863	0.0952171	3.00727	0.333537	4.46442	1.66305	0.289252	0.100685
cg17073859	4	148401828	EDNRA	0.228682	0.640228	0.411546	0.0178266	0.483153	0.175739	2.36707	positive	0.903579	0.816454	0.00083313	0.201569	0.27843	0.24324	0.25977	0.79148	0.39149	0.85993	0.79543	0.18189	0.18008	0.224909	0.16863	0.0952171	3.00727	0.333537	4.46442	1.66305	0.289252	0.100685
cg00974629	4	148401903	EDNRA	0.224118	0.536938	0.31282	0.025111	0.50288	0.175739	2.36707	positive	0.94075	0.885011	0.00015727	0.112263	0.22654	0.28334	0.24252	0.63907	0.30136	0.77088	0.63004	0.18935	0.17884	0.224909	0.16863	0.0952171	3.00727	0.333537	4.46442	1.66305	0.289252	0.100685
cg09209510	14	100288389	EML1	0.616796	0.29885	-0.317946	0.00051022	0.185842	22.0394	7.14585	positive	0.886495	0.785873	0.00144934	0.245782	0.60742	0.61661	0.59499	0.30026	0.36554	0.39117	0.28165	0.69134	0.57362	18.253	20.2568	22.1304	2.62508	17.1111	4.06812	4.77909	31.404	18.1527
cg02046552	8	21914287	EPB49	0.704408	0.444404	-0.260004	0.0370497	0.523137	7.88921	5.34654	positive	0.864953	0.748143	0.00260492	0.302137	0.79112	0.77523	0.6121	0.36978	0.64904	0.23994	0.30967	0.64667	0.69692	10.6039	8.3683	6.11633	6.27272	9.04297	3.65741	2.41307	7.69219	6.66534
cg20998539	17	62208374	ERN1	0.107648	0.268784	0.161136	0.0282709	0.507815	1.72985	2.1336	positive	0.863605	0.745814	0.00269331	0.305119	0.10844	0.12451	0.11031	0.42092	0.18458	0.29684	0.29519	0.11038	0.0846	1.49539	2.01859	1.69609	2.76752	1.60837	1.9874	2.17112	1.73946	1.69974
cg02965931	6	133672385	EYA4	0.481786	0.685304	0.203518	0.0412983	0.532135	0.0144309	1.08914	positive	0.907241	0.823087	0.00073021	0.195231	0.44537	0.44355	0.52366	0.8653	0.64962	0.83061	0.55679	0.47579	0.52056	0	0	0.0435505	2.5796	0.17138	1.37568	0.229903	0	0.0286039
cg25012529	13	113793489	F10	0.698058	0.52398	-0.174078	0.00046862	0.180704	16.3257	4.15422	positive	0.878317	0.77144	0.00183364	0.267267	0.78254	0.67825	0.66097	0.48963	0.58375	0.52512	0.4639	0.67896	0.68957	17.4079	23.2211	13.5505	1.09517	10.1282	3.00877	2.38474	12.4322	15.0169
cg18535410	13	113793268	F10	0.782082	0.566852	-0.21523	0.0141538	0.465388	16.3257	4.15422	positive	0.853462	0.728397	0.00342623	0.332188	0.81188	0.73898	0.81139	0.5145	0.58533	0.50087	0.46289	0.73655	0.81161	17.4079	23.2211	13.5505	1.09517	10.1282	3.00877	2.38474	12.4322	15.0169
cg03176971	13	108500146	FAM155A	0.778298	0.478554	-0.299744	0.0120916	0.452174	6.97506	3.50745	positive	0.951216	0.904811	8.049e-05	0.0811866	0.78791	0.69698	0.77031	0.68518	0.55455	0.39	0.25779	0.83012	0.80617	7.54932	5.24686	7.84776	6.06	5.21629	1.51155	1.24195	8.0303	6.20107
cg05697976	12	29376483	FAR2	0.777654	0.560518	-0.217136	0.00312225	0.326741	7.07043	3.20234	positive	0.843795	0.71199	0.00424232	0.351047	0.75023	0.80083	0.75145	0.65253	0.61625	0.51827	0.4223	0.72146	0.8643	5.54732	10.5004	6.26103	5.69404	4.29741	1.17198	1.64593	6.55048	6.49293
cg24938743	13	98960620	FARP1	0.851096	0.692456	-0.15864	0.0451446	0.539859	135.63	44.1412	positive	0.839022	0.703958	0.00469049	0.360194	0.84523	0.84714	0.83725	0.68657	0.77381	0.56298	0.58087	0.8045	0.92136	129.507	131.674	95.1801	28.7621	77.9019	31.3294	38.5712	173.744	148.046
cg13187820	13	98960562	FARP1	0.869774	0.689958	-0.179816	0.0281319	0.507787	135.63	44.1412	positive	0.837069	0.700685	0.00488285	0.364315	0.8659	0.87213	0.861	0.64325	0.81539	0.6771	0.51937	0.85154	0.8983	129.507	131.674	95.1801	28.7621	77.9019	31.3294	38.5712	173.744	148.046
cg25137590	4	153242621	FBXW7	0.124282	0.51444	0.390158	0.0233822	0.498228	4.419	6.1258	positive	0.884686	0.78267	0.00152898	0.25012	0.13587	0.17432	0.13755	0.72747	0.2883	0.67998	0.67168	0.08159	0.09208	5.5652	4.43872	3.90618	7.29438	4.50337	6.82133	5.88414	4.32977	3.85515
cg04807669	11	128636703	FLI1	0.41385	0.755698	0.341848	0.00033698	0.15923	1.70083	7.09973	positive	0.86864	0.754535	0.0023733	0.289234	0.44735	0.5649	0.33331	0.77279	0.79799	0.68532	0.7169	0.36283	0.36086	2.12028	3.47123	0.639302	11.3148	5.26574	5.06293	6.75546	1.4535	0.819821
cg04787888	16	86547322	FOXF1	0.644022	0.373182	-0.27084	0.0278914	0.507027	10.798	3.3177	positive	0.891083	0.794028	0.00126029	0.235079	0.73346	0.77712	0.53841	0.4034	0.51994	0.22682	0.14272	0.62598	0.54514	8.31954	15.0245	11.2153	2.7616	10.0167	0.128494	0.363986	11.9777	7.45306
cg08130572	6	112081102	FYN	0.044644	0.441826	0.397182	0.0286607	0.507979	8.48423	23.0145	positive	0.876686	0.768579	0.00191791	0.271338	0.0363	0.04145	0.04853	0.57393	0.22698	0.63927	0.67846	0.0585	0.03844	7.19741	15.8446	4.45428	19.0576	9.4091	36.1805	27.4107	6.90614	8.01874
cg14482998	6	111984370	FYN	0.21675	0.600988	0.384238	0.0215963	0.494781	8.48423	23.0145	positive	0.896397	0.803528	0.00106357	0.22164	0.35831	0.2482	0.18832	0.60748	0.47152	0.86988	0.79483	0.1243	0.16462	7.19741	15.8446	4.45428	19.0576	9.4091	36.1805	27.4107	6.90614	8.01874
cg08061598	6	112081538	FYN	0.22615	0.640468	0.414318	0.0172081	0.481206	8.48423	23.0145	positive	0.842742	0.710214	0.00433858	0.352674	0.27586	0.3022	0.22357	0.84301	0.43052	0.77011	0.8346	0.18542	0.1437	7.19741	15.8446	4.45428	19.0576	9.4091	36.1805	27.4107	6.90614	8.01874
cg08041603	11	78093881	GAB2	0.192102	0.469552	0.27745	0.046818	0.542389	3.67248	6.87836	positive	0.868055	0.753519	0.00240906	0.290957	0.21573	0.18858	0.21331	0.80868	0.24864	0.55057	0.39857	0.17533	0.16756	3.40412	3.62525	3.06508	8.24813	2.99798	9.27607	6.99126	4.28637	3.9816
cg16319535	5	153599583	GALNT10	0.517418	0.797084	0.279666	0.00523897	0.378328	24.7528	49.0045	positive	0.838176	0.70254	0.00477312	0.361449	0.71511	0.43713	0.46034	0.86303	0.63373	0.8969	0.88651	0.4904	0.48411	25.287	13.2197	34.6089	50.7724	29.4876	53.9552	61.8029	18.1042	32.5443
cg26013791	5	153785129	GALNT10	0.116398	0.387744	0.271346	0.0278332	0.506822	24.7528	49.0045	positive	0.923024	0.851974	0.0003862	0.156967	0.14968	0.0959	0.1609	0.45801	0.23648	0.4892	0.5959	0.10615	0.06936	25.287	13.2197	34.6089	50.7724	29.4876	53.9552	61.8029	18.1042	32.5443
cg19295314	6	1635640	GMDS	0.080178	0.458506	0.378328	0.0274486	0.5061	9.88835	11.9811	positive	0.837696	0.701734	0.00482056	0.362282	0.11475	0.07899	0.08656	0.70543	0.25253	0.562	0.63755	0.07224	0.04835	10.2384	8.51241	9.05764	12.9108	10.652	11.759	12.6027	10.4775	11.1558
cg06895747	7	2842593	GNA12	0.70051	0.469498	-0.231012	0.0253001	0.50334	51.8402	40.0873	positive	0.864432	0.747243	0.00263885	0.303229	0.72837	0.65711	0.70565	0.34766	0.61339	0.48529	0.28445	0.67716	0.73426	49.3428	53.2157	54.8074	38.9708	43.2339	39.1382	39.0062	47.7519	54.0832
cg11018271	7	2854958	GNA12	0.929608	0.563844	-0.365764	0.00341388	0.335973	51.8402	40.0873	positive	0.912467	0.832595	0.00059923	0.180889	0.91898	0.92121	0.9093	0.49732	0.77359	0.53657	0.41095	0.93181	0.96674	49.3428	53.2157	54.8074	38.9708	43.2339	39.1382	39.0062	47.7519	54.0832
cg27019717	14	52351055	GNG2	0.062036	0.631334	0.569298	0.0180108	0.484176	1.0176	5.82142	positive	0.880164	0.77469	0.0017413	0.261944	0.07267	0.06133	0.1008	0.85221	0.44381	0.90049	0.82245	0.0409	0.03448	0.86765	0.571595	1.40287	8.75451	2.19343	8.91918	3.41855	0.763988	1.48189
cg00977978	7	139409421	HIPK2	0.163004	0.654526	0.491522	0.00787981	0.415797	2.8286	7.53958	positive	0.963444	0.928224	2.967e-05	0.0537675	0.14962	0.23639	0.19607	0.80913	0.49493	0.83776	0.80773	0.10846	0.12448	2.61502	2.41286	3.37637	8.99327	4.46775	7.85046	8.84685	2.33301	3.40572
cg06079564	7	139468310	HIPK2	0.538568	0.793586	0.255018	0.00424653	0.354924	2.8286	7.53958	positive	0.919122	0.844786	0.00045739	0.164671	0.64309	0.52024	0.49024	0.84247	0.74274	0.86436	0.90013	0.47887	0.5604	2.61502	2.41286	3.37637	8.99327	4.46775	7.85046	8.84685	2.33301	3.40572
cg02384857	7	27197614	HOXA7	0.885438	0.469944	-0.415494	0.0462529	0.541504	5.36146	1.89552	positive	0.894997	0.801019	0.00111317	0.226293	0.89771	0.89332	0.85134	0.48753	0.65321	0.16066	0.14319	0.86948	0.91534	5.19226	5.91145	6.69811	2.0763	4.83157	0.199809	0.4744	2.97597	6.0295
cg08396193	7	27193709	HOXA7	0.91079	0.726424	-0.184366	0.0473927	0.543017	5.36146	1.89552	positive	0.842249	0.709384	0.0043841	0.353235	0.91484	0.90395	0.89828	0.72522	0.82621	0.69552	0.50261	0.90392	0.93296	5.19226	5.91145	6.69811	2.0763	4.83157	0.199809	0.4744	2.97597	6.0295
cg06911354	7	27197455	HOXA7	0.908	0.589354	-0.318646	0.0466192	0.542304	5.36146	1.89552	positive	0.860858	0.741076	0.00287993	0.312211	0.89352	0.89482	0.8908	0.48709	0.74755	0.50325	0.28129	0.91305	0.94781	5.19226	5.91145	6.69811	2.0763	4.83157	0.199809	0.4744	2.97597	6.0295
cg02000318	7	27197713	HOXA7	0.777694	0.426696	-0.350998	0.0496941	0.54684	5.36146	1.89552	positive	0.902474	0.814459	0.00086605	0.204944	0.73246	0.7802	0.76943	0.35735	0.60045	0.14195	0.21	0.78021	0.82617	5.19226	5.91145	6.69811	2.0763	4.83157	0.199809	0.4744	2.97597	6.0295
cg15372603	7	27197239	HOXA7	0.8628	0.502682	-0.360118	0.0353544	0.519227	5.36146	1.89552	positive	0.904727	0.818531	0.00079984	0.199852	0.86367	0.87818	0.8417	0.41585	0.65592	0.29496	0.27033	0.83233	0.89812	5.19226	5.91145	6.69811	2.0763	4.83157	0.199809	0.4744	2.97597	6.0295
cg24389054	7	27194013	HOXA7	0.877426	0.707502	-0.169924	0.0333462	0.516822	5.36146	1.89552	positive	0.901992	0.813589	0.00088071	0.205978	0.89065	0.87012	0.86192	0.68071	0.83192	0.65289	0.5467	0.84677	0.91767	5.19226	5.91145	6.69811	2.0763	4.83157	0.199809	0.4744	2.97597	6.0295
cg05992786	12	54446308	HOXC4	0.050996	0.449394	0.398398	0.0256013	0.50381	0.117456	3.81386	positive	0.968433	0.937862	1.784e-05	0.047191	0.06992	0.0706	0.05833	0.51912	0.29106	0.5813	0.75743	0.03317	0.02296	1.967e-30	0.451036	0.0574771	4.61202	1.26349	4.70073	4.67922	0.0263661	0.0524015
cg05408649	12	54446019	HOXC4	0.060068	0.610958	0.55089	0.0275488	0.506134	0.117456	3.81386	positive	0.990433	0.980958	2.794e-07	0.00837501	0.07286	0.07855	0.07042	0.75535	0.32465	0.91491	0.93138	0.06012	0.01839	1.967e-30	0.451036	0.0574771	4.61202	1.26349	4.70073	4.67922	0.0263661	0.0524015
cg01473837	12	54409321	HOXC4	0.161276	0.543284	0.382008	0.00790926	0.416241	0.117456	3.81386	positive	0.915331	0.837831	0.0005349	0.17311	0.06728	0.18327	0.20131	0.66866	0.55496	0.66277	0.61026	0.21825	0.13627	1.967e-30	0.451036	0.0574771	4.61202	1.26349	4.70073	4.67922	0.0263661	0.0524015
cg03416628	12	54446505	HOXC4	0.047498	0.284538	0.23704	0.0186386	0.486516	0.117456	3.81386	positive	0.980081	0.96056	3.602e-06	0.0228414	0.05633	0.05125	0.06811	0.35361	0.21068	0.40483	0.37956	0.03814	0.02366	1.967e-30	0.451036	0.0574771	4.61202	1.26349	4.70073	4.67922	0.0263661	0.0524015
cg27138204	12	54446100	HOXC4	0.07911	0.495274	0.416164	0.0318239	0.514453	0.117456	3.81386	positive	0.965624	0.932429	2.398e-05	0.0500514	0.08932	0.08638	0.10585	0.51583	0.31583	0.75959	0.77774	0.0669	0.0471	1.967e-30	0.451036	0.0574771	4.61202	1.26349	4.70073	4.67922	0.0263661	0.0524015
cg02721000	12	54441213	HOXC4	0.369116	0.685936	0.31682	0.0231524	0.497776	0.117456	3.81386	positive	0.947942	0.898595	0.0001007	0.0892828	0.23391	0.46889	0.43774	0.73997	0.47868	0.94467	0.79816	0.35732	0.34772	1.967e-30	0.451036	0.0574771	4.61202	1.26349	4.70073	4.67922	0.0263661	0.0524015
cg11941633	12	54422447	HOXC4	0.123428	0.375458	0.25203	0.0469461	0.542613	0.117456	3.81386	positive	0.869769	0.756498	0.00230532	0.285677	0.09781	0.25529	0.10449	0.28601	0.20991	0.65606	0.51994	0.11369	0.04586	1.967e-30	0.451036	0.0574771	4.61202	1.26349	4.70073	4.67922	0.0263661	0.0524015
cg10366797	12	54441509	HOXC4	0.64181	0.841803	0.199992	0.00638922	0.395349	0.117456	3.81386	positive	0.931463	0.867624	0.00076403	0.197339	0.54625	0.65321	0.63079	0.84838		0.90616	0.88189	0.66286	0.71594	1.967e-30	0.451036	0.0574771	4.61202	1.26349	4.70073	4.67922	0.0263661	0.0524015
cg21216477	12	54440773	HOXC4	0.43395	0.69196	0.25801	0.0167778	0.478667	0.117456	3.81386	positive	0.960532	0.922621	3.869e-05	0.0613462	0.32786	0.5037	0.47158	0.73378	0.5226	0.86912	0.79705	0.4176	0.44901	1.967e-30	0.451036	0.0574771	4.61202	1.26349	4.70073	4.67922	0.0263661	0.0524015
cg11594833	12	54444985	HOXC4	0.405876	0.751086	0.34521	0.00795629	0.41688	0.117456	3.81386	positive	0.949043	0.900683	9.355e-05	0.0867744	0.29831	0.52489	0.44958	0.85768	0.63464	0.91166	0.85145	0.29591	0.46069	1.967e-30	0.451036	0.0574771	4.61202	1.26349	4.70073	4.67922	0.0263661	0.0524015
cg25975485	12	54446537	HOXC4	0.056136	0.308408	0.252272	0.0219279	0.495506	0.117456	3.81386	positive	0.960642	0.922833	3.832e-05	0.0613457	0.0566	0.06693	0.06084	0.3459	0.20246	0.36876	0.51261	0.05665	0.03966	1.967e-30	0.451036	0.0574771	4.61202	1.26349	4.70073	4.67922	0.0263661	0.0524015
cg22621272	12	54409336	HOXC4	0.327414	0.670642	0.343228	0.0070259	0.405024	0.117456	3.81386	positive	0.945042	0.893104	0.0001214	0.0988513	0.22784	0.41177	0.32554	0.73657	0.58961	0.8509	0.75713	0.40135	0.27057	1.967e-30	0.451036	0.0574771	4.61202	1.26349	4.70073	4.67922	0.0263661	0.0524015
cg19696083	12	54438419	HOXC4	0.276904	0.433214	0.15631	0.0297951	0.510064	0.117456	3.81386	positive	0.89415	0.799505	0.0011439	0.228331	0.20322	0.40926	0.27836	0.56256	0.3161	0.46047	0.48827	0.23653	0.25715	1.967e-30	0.451036	0.0574771	4.61202	1.26349	4.70073	4.67922	0.0263661	0.0524015
cg22370252	12	54446289	HOXC4	0.075576	0.499076	0.4235	0.0244819	0.501972	0.117456	3.81386	positive	0.977781	0.956055	5.268e-06	0.027255	0.14416	0.07377	0.06504	0.59531	0.32819	0.69491	0.76399	0.05608	0.03883	1.967e-30	0.451036	0.0574771	4.61202	1.26349	4.70073	4.67922	0.0263661	0.0524015
cg21493516	12	54446033	HOXC4	0.024	0.534074	0.510074	0.0322696	0.515639	0.117456	3.81386	positive	0.980451	0.961284	3.374e-06	0.022574	0.03903	0.02567	0.02994	0.61788	0.28044	0.83881	0.87214	0.0149	0.01046	1.967e-30	0.451036	0.0574771	4.61202	1.26349	4.70073	4.67922	0.0263661	0.0524015
cg15817960	12	54409599	HOXC4	0.462848	0.72898	0.266132	0.0305507	0.511704	0.117456	3.81386	positive	0.970955	0.942753	5.993e-05	0.0712942		0.56765	0.42568	0.79107	0.56273	0.91571	0.87606	0.4596	0.39846	1.967e-30	0.451036	0.0574771	4.61202	1.26349	4.70073	4.67922	0.0263661	0.0524015
cg15244786	12	54446279	HOXC4	0.23994	0.690546	0.450606	0.0193656	0.487421	0.117456	3.81386	positive	0.985941	0.97208	1.07e-06	0.0195962	0.23188	0.28489	0.26277	0.80091	0.50149	0.91391	0.92137	0.25088	0.16928	1.967e-30	0.451036	0.0574771	4.61202	1.26349	4.70073	4.67922	0.0263661	0.0524015
cg26201952	12	54446253	HOXC4	0.053374	0.350136	0.296762	0.0398296	0.528517	0.117456	3.81386	positive	0.909898	0.827914	0.00066136	0.188507	0.06308	0.06648	0.05625	0.2956	0.23348	0.47906	0.65613	0.06175	0.01931	1.967e-30	0.451036	0.0574771	4.61202	1.26349	4.70073	4.67922	0.0263661	0.0524015
cg09045007	12	54392734	HOXC9	0.065724	0.241438	0.175714	0.0378972	0.524245	0.445885	2.93602	positive	0.901699	0.81306	0.0008897	0.20677	0.06094	0.08674	0.08036	0.34891	0.11629	0.40236	0.21315	0.05862	0.04196	0.0287878	1.23599	0.362356	4.53816	1.47049	2.92063	2.81482	0.287838	0.314451
cg10587913	12	54392867	HOXC9	0.061586	0.305744	0.244158	0.0252071	0.503057	0.445885	2.93602	positive	0.842309	0.709485	0.00437852	0.35313	0.05531	0.07212	0.07978	0.32534	0.17769	0.47178	0.43969	0.05881	0.04191	0.0287878	1.23599	0.362356	4.53816	1.47049	2.92063	2.81482	0.287838	0.314451
cg14118850	2	10447890	HPCAL1	0.701882	0.410238	-0.291644	0.0443829	0.538517	43.2922	19.2858	positive	0.90369	0.816656	0.00082986	0.201569	0.72091	0.71646	0.67564	0.32199	0.73056	0.19867	0.24416	0.69812	0.69828	41.3805	39.7235	47.3845	21.6109	30.4264	12.1471	12.9588	39.2275	48.7448
cg24348573	10	6020387	IL15RA	0.103482	0.5799	0.476418	0.00637005	0.39489	1.30214	4.56568	positive	0.957113	0.916066	5.157e-05	0.0679594	0.13376	0.09744	0.13248	0.65855	0.38362	0.76191	0.76231	0.08054	0.07319	1.38639	1.56356	0.749457	4.5284	2.64624	4.65809	6.43	1.29275	1.51854
cg09290866	10	6020369	IL15RA	0.151912	0.541132	0.38922	0.00475174	0.3671	1.30214	4.56568	positive	0.905512	0.819953	0.00077762	0.19769	0.19236	0.27363	0.11857	0.66309	0.37778	0.72727	0.60313	0.09834	0.07666	1.38639	1.56356	0.749457	4.5284	2.64624	4.65809	6.43	1.29275	1.51854
cg13730379	10	6020585	IL15RA	0.384832	0.717006	0.332174	6.842e-05	0.0932869	1.30214	4.56568	positive	0.873894	0.76369	0.00206839	0.277534	0.48594	0.40774	0.33895	0.68868	0.7141	0.74933	0.76462	0.39038	0.30115	1.38639	1.56356	0.749457	4.5284	2.64624	4.65809	6.43	1.29275	1.51854
cg13035046	3	13115843	IQSEC1	0.634808	0.373666	-0.261142	0.0158812	0.474469	9.09613	7.40426	positive	0.848909	0.720647	0.00379568	0.341859	0.72676	0.62592	0.59351	0.26601	0.62487	0.35045	0.23307	0.65441	0.57344	9.65078	10.7943	7.76597	5.34377	10.3667	7.43953	6.46704	8.83245	8.43715
cg13056524	6	15448614	JARID2	0.252432	0.665116	0.412684	0.0194941	0.487708	5.47763	6.79042	positive	0.844731	0.71357	0.00415806	0.350244	0.31763	0.26469	0.2386	0.83778	0.39979	0.8397	0.86189	0.19771	0.24353	6.18154	4.89365	4.75543	6.64347	5.85664	7.2562	7.40537	6.11172	5.44581
cg22570970	6	15401067	JARID2	0.065592	0.347264	0.281672	0.0213714	0.494329	5.47763	6.79042	positive	0.876096	0.767545	0.00194905	0.272198	0.1037	0.0528	0.07158	0.42784	0.2154	0.47553	0.50749	0.08481	0.01507	6.18154	4.89365	4.75543	6.64347	5.85664	7.2562	7.40537	6.11172	5.44581
cg05499054	8	75148806	JPH1	0.094406	0.428388	0.333982	0.027908	0.507087	0.185263	1.0209	positive	0.844801	0.713688	0.00415178	0.349994	0.09471	0.17537	0.08534	0.67436	0.27562	0.64985	0.37418	0.07858	0.03803	0.0649355	0	0.452393	2.21535	0.437179	1.19245	0.238628	0.214007	0.19498
cg03341748	3	156091058	KCNAB1	0.165296	0.370934	0.205638	0.0121332	0.452422	0.53934	8.77793	positive	0.859668	0.73903	0.00296342	0.315557	0.23768	0.15459	0.16702	0.53938	0.24845	0.31376	0.32548	0.15888	0.10831	0.418727	0.411205	0.697794	29.6883	0.449862	0.691991	4.28156	0.618316	0.550656
cg05616379	2	26943660	KCNK3	0.28482	0.519868	0.235048	0.0448451	0.539363	0.0122491	1.34622	positive	0.843963	0.712274	0.00422707	0.351047	0.30898	0.35928	0.25064	0.63513	0.33612	0.65468	0.67335	0.25613	0.24907	0.0409815	0	0.0099892	2.54438	0.128728	1.94779	0.763976	0.0102748	0
cg02830749	4	154451068	KIAA0922	0.453192	0.753216	0.300024	0.00430697	0.356255	1.15501	8.78986	positive	0.900332	0.810597	0.00093247	0.210379	0.48497	0.54822	0.41166	0.80273	0.69383	0.88023	0.83988	0.44608	0.37503	1.26916	1.19268	0.752533	10.7131	2.28877	13.3056	8.85198	1.30561	1.25506
cg05217312	10	24417827	KIAA1217	0.212102	0.461706	0.249604	0.00074907	0.210756	0.421357	4.07359	positive	0.856656	0.733859	0.0031823	0.323837	0.27347	0.19893	0.21473	0.56647	0.43593	0.51575	0.35517	0.24854	0.12484	0.248634	0.700784	0.401347	7.68411	2.27166	3.21076	3.12784	0.334872	0.421149
cg08041350	17	25819112	KSR1	0.23884	0.425604	0.186764	0.0104274	0.439161	1.47165	4.23502	positive	0.881736	0.777458	0.00166535	0.25784	0.28058	0.25869	0.22412	0.48743	0.2881	0.46858	0.5257	0.24641	0.1844	1.3352	0.98412	1.03842	3.90628	1.47401	4.24871	7.31108	2.1447	1.85579
cg17456644	17	25879003	KSR1	0.31157	0.58708	0.27551	0.0463952	0.541808	1.47165	4.23502	positive	0.861662	0.742462	0.00282438	0.309592	0.24609	0.20887	0.34198	0.69589	0.42116	0.78421	0.74674	0.46781	0.2931	1.3352	0.98412	1.03842	3.90628	1.47401	4.24871	7.31108	2.1447	1.85579
cg09076431	1	197889163	LHX9	0.195814	0.349908	0.154094	0.0306369	0.511952	0.0633032	1.53958	positive	0.9173	0.841439	0.00049359	0.168201	0.2184	0.17223	0.22436	0.34349	0.3882	0.48205	0.35056	0.16919	0.19489	0.185655	0.0491256	0.0199962	0.584598	1.6422	3.14606	0.785464	0.0412266	0.0205127
cg18453551	3	128226565	LOC90246	0.629324	0.414274	-0.21505	0.0115214	0.448402	2.56255	0.60708	positive	0.920527	0.84737	0.00043078	0.162359	0.6498	0.67123	0.61963	0.39306	0.56343	0.34143	0.27023	0.52554	0.68042	2.68895	2.17755	2.77865	0.450651	1.62728	0.0790599	0.27133	2.48262	2.68498
cg03471593	16	55542668	LPCAT2	0.905306	0.650612	-0.254694	0.00190796	0.280253	25.7042	10.7826	positive	0.845843	0.71545	0.00405937	0.348446	0.90355	0.9103	0.89586	0.60804	0.66994	0.59905	0.56965	0.84756	0.96926	20.4113	21.993	24.7074	14.8651	8.61678	5.7801	13.8685	29.2887	32.1208
cg14565903	19	14260591	LPHN1	0.187964	0.482058	0.294094	0.0214528	0.494504	0.633604	2.66643	positive	0.925961	0.857403	0.00033804	0.149037	0.1787	0.23404	0.25172	0.72974	0.27343	0.5184	0.56461	0.14038	0.13498	0.517788	1.20123	0.424554	3.01863	1.04762	3.37533	3.22414	0.503572	0.520875
cg02286761	19	14315694	LPHN1	0.1897	0.371324	0.181624	0.00277756	0.315338	0.633604	2.66643	positive	0.884045	0.781536	0.00155791	0.251231	0.16506	0.14784	0.2476	0.38094	0.26138	0.45065	0.3421	0.19735	0.19065	0.517788	1.20123	0.424554	3.01863	1.04762	3.37533	3.22414	0.503572	0.520875
cg08173263	19	14276911	LPHN1	0.389494	0.675886	0.286392	0.0215674	0.494706	0.633604	2.66643	positive	0.965924	0.933009	2.326e-05	0.0494909	0.30141	0.43347	0.41921	0.68221	0.40623	0.84995	0.83035	0.39806	0.39532	0.517788	1.20123	0.424554	3.01863	1.04762	3.37533	3.22414	0.503572	0.520875
cg04416414	19	14260587	LPHN1	0.162884	0.438274	0.27539	0.0395018	0.527618	0.633604	2.66643	positive	0.933111	0.870697	0.00023861	0.133049	0.16668	0.17112	0.15507	0.69747	0.20249	0.48962	0.54096	0.15452	0.16703	0.517788	1.20123	0.424554	3.01863	1.04762	3.37533	3.22414	0.503572	0.520875
cg15417798	19	14260651	LPHN1	0.167546	0.40197	0.234424	0.0256018	0.50381	0.633604	2.66643	positive	0.943413	0.890029	0.00013424	0.104857	0.17898	0.22915	0.16483	0.59967	0.23084	0.43238	0.48676	0.14962	0.11515	0.517788	1.20123	0.424554	3.01863	1.04762	3.37533	3.22414	0.503572	0.520875
cg21272716	6	25619939	LRRC16A	0.59406	0.783784	0.189724	0.00188228	0.279016	1.66569	6.77804	positive	0.909509	0.827206	0.00067115	0.19043	0.59599	0.49945	0.62725	0.84078	0.79505	0.82919	0.67185	0.57383	0.67378	3.06568	1.09435	1.97228	7.98219	6.71256	7.55463	4.86278	0.972861	1.2233
cg22046408	19	41106164	LTBP4	0.05198	0.290336	0.238356	0.0481838	0.544582	4.04421	9.73484	positive	0.858068	0.736281	0.00307833	0.320408	0.05709	0.06711	0.07291	0.53759	0.13876	0.28473	0.41316	0.03834	0.02445	3.92141	3.84708	2.5942	14.9759	3.32479	12.463	8.17568	6.38261	3.47574
cg03045325	11	63871265	MACROD1	0.33013	0.58215	0.25202	0.0295229	0.509796	2.54201	3.67876	positive	0.845044	0.7141	0.00413008	0.349994	0.38216	0.31969	0.34261	0.68834	0.32237	0.77684	0.5901	0.29795	0.30824	3.17731	1.84797	1.79821	4.25008	1.33006	5.82343	3.31147	3.42817	2.45837
cg04391800	3	65779802	MAGI1	0.313236	0.673226	0.35999	0.0322801	0.515641	2.68613	10.7188	positive	0.908204	0.824834	0.00070471	0.19255	0.25522	0.35755	0.41324	0.84794	0.4051	0.9103	0.81725	0.24977	0.2904	2.65635	2.27308	3.00699	8.04017	4.727	17.3965	12.7114	2.73544	2.7588
cg23080908	3	65580091	MAGI1	0.210122	0.561738	0.351616	0.0424957	0.534162	2.68613	10.7188	positive	0.903286	0.815925	0.00084177	0.201778	0.30479	0.16902	0.16788	0.7562	0.36028	0.80426	0.6985	0.24109	0.16783	2.65635	2.27308	3.00699	8.04017	4.727	17.3965	12.7114	2.73544	2.7588
cg05173749	5	71452580	MAP1B	0.08013	0.493726	0.413596	0.0278053	0.506758	18.0288	48.3166	positive	0.926234	0.857909	0.00033379	0.149037	0.09633	0.11574	0.07303	0.75053	0.24924	0.62062	0.69879	0.07229	0.04326	15.9884	14.1842	19.3457	68.949	24.6936	36.1106	63.5131	17.4376	23.1883
cg20055861	15	68055293	MAP2K5	0.117254	0.48631	0.369056	0.0175848	0.482264	4.09601	5.41383	positive	0.879393	0.773331	0.00177948	0.26458	0.14522	0.19811	0.09071	0.55144	0.33217	0.73755	0.61344	0.08032	0.07191	4.72981	4.26626	3.29701	5.16607	4.3278	6.8108	5.35065	4.35955	3.8274
cg05849612	8	98969923	MATN2	0.144918	0.373692	0.228774	0.0153414	0.471478	9.78327	25.8997	positive	0.945335	0.893658	0.00011918	0.0975291	0.21531	0.14211	0.1164	0.48202	0.20477	0.53304	0.3514	0.17299	0.07778	16.2819	8.24026	5.83598	38.7287	11.7431	29.1731	23.954	10.1972	8.36099
cg21655444	18	74770402	MBP	0.214322	0.675586	0.461264	0.00496478	0.372097	1.03221	8.78859	positive	0.965809	0.932788	2.353e-05	0.0497495	0.30535	0.28422	0.24157	0.78422	0.64606	0.88099	0.73063	0.10313	0.13734	2.71173	1.82853	0.338559	7.72014	7.75539	12.6748	7.00402	0.110787	0.171444
cg27262850	18	74826769	MBP	0.188646	0.360686	0.17204	0.0212383	0.493481	1.03221	8.78859	positive	0.883049	0.779775	0.00160366	0.254014	0.1885	0.20473	0.21787	0.45471	0.29884	0.42885	0.41901	0.17388	0.15825	2.71173	1.82853	0.338559	7.72014	7.75539	12.6748	7.00402	0.110787	0.171444
cg07807210	18	74770431	MBP	0.163634	0.611256	0.447622	0.0106726	0.441637	1.03221	8.78859	positive	0.935953	0.876009	0.00020555	0.126231	0.21442	0.21797	0.21378	0.81761	0.47595	0.83924	0.63972	0.0611	0.1109	2.71173	1.82853	0.338559	7.72014	7.75539	12.6748	7.00402	0.110787	0.171444
cg07006718	18	74770589	MBP	0.268124	0.638928	0.370804	0.0122145	0.452975	1.03221	8.78859	positive	0.914356	0.836047	0.00055622	0.176343	0.32418	0.26846	0.31009	0.81643	0.48553	0.81483	0.70007	0.20887	0.22902	2.71173	1.82853	0.338559	7.72014	7.75539	12.6748	7.00402	0.110787	0.171444
cg13852093	18	74770815	MBP	0.25132	0.647798	0.396478	0.00456174	0.36207	1.03221	8.78859	positive	0.927885	0.860971	0.00030887	0.146348	0.2972	0.29885	0.25323	0.80717	0.50511	0.8002	0.68462	0.17516	0.23216	2.71173	1.82853	0.338559	7.72014	7.75539	12.6748	7.00402	0.110787	0.171444
cg26457248	18	74840216	MBP	0.079392	0.57487	0.495478	0.0197674	0.489209	1.03221	8.78859	positive	0.870141	0.757146	0.00228319	0.285674	0.13103	0.05944	0.06155	0.81647	0.33141	0.76654	0.78099	0.10527	0.03967	2.71173	1.82853	0.338559	7.72014	7.75539	12.6748	7.00402	0.110787	0.171444
cg02528008	5	112560177	MCC	0.124856	0.311546	0.18669	0.041015	0.531339	2.46761	9.09486	positive	0.8522	0.726245	0.003526	0.335587	0.15067	0.14197	0.22959	0.48669	0.27808	0.28042	0.40225	0.05079	0.05126	3.26074	3.86669	1.7312	15.4362	3.85927	9.37449	7.70946	1.42855	2.05089
cg07324054	18	55862037	NEDD4L	0.887696	0.694382	-0.193314	0.0383187	0.524808	14.9799	7.93426	positive	0.886995	0.78676	0.00142783	0.244689	0.88007	0.87797	0.89151	0.62095	0.76429	0.50715	0.69623	0.88719	0.90174	14.7687	15.3495	16.355	10.1664	12.3719	4.11133	5.08742	12.7404	15.6861
cg18720828	18	55862058	NEDD4L	0.862238	0.626806	-0.235432	0.0332493	0.516822	14.9799	7.93426	positive	0.955479	0.91294	5.869e-05	0.0703818	0.85881	0.86302	0.86119	0.57534	0.73714	0.49443	0.47079	0.84978	0.87839	14.7687	15.3495	16.355	10.1664	12.3719	4.11133	5.08742	12.7404	15.6861
cg18524262	18	55862111	NEDD4L	0.898752	0.583772	-0.31498	0.0224746	0.496441	14.9799	7.93426	positive	0.954616	0.911292	6.272e-05	0.0728251	0.88584	0.88784	0.90713	0.58787	0.6519	0.4275	0.38016	0.88664	0.92631	14.7687	15.3495	16.355	10.1664	12.3719	4.11133	5.08742	12.7404	15.6861
cg14285539	9	127032953	NEK6	0.503016	0.67538	0.172364	0.0103618	0.438647	31.1174	40.5961	positive	0.87517	0.765922	0.00199865	0.274061	0.57211	0.49835	0.44951	0.74165	0.6233	0.80432	0.58474	0.53407	0.46104	31.3032	37.9959	26.0684	41.6724	37.9963	46.8568	35.8588	29.6907	30.529
cg14431257	9	14082328	NFIB	0.696828	0.882236	0.185408	0.0036467	0.341646	0.0764655	9.80119	positive	0.879748	0.773956	0.00176184	0.2636	0.61073	0.74588	0.72427	0.90624	0.76253	0.91375	0.93163	0.62336	0.7799	0.0533627	0.222273	0.0481333	9.35921	2.91083	14.2495	12.6852	0.00976813	0.0487904
cg09331335	19	13209485	NFIX	0.059418	0.240032	0.180614	0.0498017	0.54706	6.88348	34.4706	positive	0.967795	0.936627	1.912e-05	0.0474643	0.06911	0.07527	0.0861	0.31198	0.09641	0.34018	0.38292	0.03772	0.02889	9.37008	7.65625	5.3781	32.3644	13.4603	49.3578	42.6999	4.7189	7.29408
cg18299835	19	13207445	NFIX	0.352798	0.542456	0.189658	0.0482473	0.544716	6.88348	34.4706	positive	0.887845	0.788269	0.00139177	0.24224	0.3071	0.49321	0.32729	0.63566	0.3195	0.62385	0.68178	0.30861	0.32778	9.37008	7.65625	5.3781	32.3644	13.4603	49.3578	42.6999	4.7189	7.29408
cg07788061	19	13207239	NFIX	0.270098	0.538748	0.26865	0.00941621	0.431181	6.88348	34.4706	positive	0.924247	0.854233	0.00036559	0.154753	0.33467	0.34074	0.25283	0.64334	0.4054	0.62021	0.6603	0.25802	0.16423	9.37008	7.65625	5.3781	32.3644	13.4603	49.3578	42.6999	4.7189	7.29408
cg13949836	9	127264292	NR5A1	0.439276	0.65515	0.215874	0.01555	0.472941	0.00267114	10.0423	positive	0.90368	0.816638	0.00083015	0.201569	0.45836	0.33622	0.43738	0.61944	0.59843	0.84184	0.71281	0.45264	0.51178	0	0	0	7.01653	3.63594	13.8433	15.6735	0	0.0133557
cg01786973	9	127249749	NR5A1	0.138665	0.439196	0.300531	0.0492211	0.545891	0.00267114	10.0423	positive	0.981011	0.962382	1.688e-05	0.0459944	0.12086	0.19933		0.35133	0.27066	0.72293	0.66993	0.14354	0.09093	0	0	0	7.01653	3.63594	13.8433	15.6735	0	0.0133557
cg04043571	9	127265989	NR5A1	0.095028	0.502712	0.407684	0.0172096	0.481206	0.00267114	10.0423	positive	0.958725	0.919154	4.517e-05	0.0659118	0.10728	0.09472	0.10128	0.39283	0.47447	0.74079	0.71979	0.10223	0.06963	0	0	0	7.01653	3.63594	13.8433	15.6735	0	0.0133557
cg13912311	9	127265348	NR5A1	0.158436	0.588774	0.430338	0.0214915	0.494504	0.00267114	10.0423	positive	0.972184	0.945141	1.15e-05	0.0379319	0.15716	0.25931	0.15297	0.51785	0.38929	0.92603	0.81175	0.15636	0.06638	0	0	0	7.01653	3.63594	13.8433	15.6735	0	0.0133557
cg14219918	9	127249562	NR5A1	0.192806	0.649796	0.45699	0.013204	0.459842	0.00267114	10.0423	positive	0.954687	0.911427	6.238e-05	0.0726891	0.24173	0.24682	0.19689	0.61091	0.59083	0.89521	0.86779	0.15735	0.12124	0	0	0	7.01653	3.63594	13.8433	15.6735	0	0.0133557
cg14157435	2	206628692	NRP2	0.195058	0.516604	0.321546	0.0379721	0.524245	11.1781	114.65	positive	0.943568	0.890321	0.00013298	0.104593	0.15054	0.08283	0.26705	0.5061	0.25147	0.83235	0.67399	0.35615	0.11872	9.53665	5.82239	9.03537	100.331	53.0095	177.584	127.676	14.5468	16.9495
cg24020215	14	79748641	NRXN3	0.62837	0.442242	-0.186128	0.0101371	0.437146	14.9491	6.74546	positive	0.869965	0.75684	0.00229363	0.285674	0.68213	0.65453	0.5863	0.43024	0.51077	0.29398	0.4254	0.62212	0.59677	13.7621	16.7319	10.0678	8.21256	10.8448	3.181	4.74349	15.3354	18.8484
cg15434778	14	79982284	NRXN3	0.869844	0.714434	-0.15541	0.0167442	0.478636	14.9491	6.74546	positive	0.879008	0.772656	0.00179869	0.265223	0.85077	0.90148	0.85581	0.66497	0.75129	0.67377	0.62752	0.87685	0.86431	13.7621	16.7319	10.0678	8.21256	10.8448	3.181	4.74349	15.3354	18.8484
cg11076902	11	78974086	ODZ4	0.12762	0.443762	0.316142	0.0306541	0.512038	0.157051	3.14884	positive	0.862572	0.744031	0.00276249	0.308296	0.13471	0.13684	0.14408	0.61201	0.25007	0.6022	0.58641	0.11389	0.10858	0.127689	0.34299	0.110655	6.60244	0.438312	2.25207	3.30253	0.125295	0.0786284
cg18224993	11	78521705	ODZ4	0.354146	0.54603	0.191884	0.0256497	0.503891	0.157051	3.14884	positive	0.89389	0.799039	0.00115349	0.228349	0.41727	0.39952	0.37484	0.75763	0.47594	0.42017	0.51608	0.24395	0.33515	0.127689	0.34299	0.110655	6.60244	0.438312	2.25207	3.30253	0.125295	0.0786284
cg09461005	10	34612060	PARD3	0.18524	0.415468	0.230228	0.0460547	0.541169	10.5911	13.5437	positive	0.915439	0.838028	0.00053258	0.172869	0.19575	0.24086	0.24661	0.69105	0.20642	0.48392	0.31951	0.1482	0.09478	10.5643	10.8004	11.1498	16.0272	11.9066	15.002	11.239	9.33621	11.1047
cg14393693	6	166045279	PDE10A	0.430646	0.730078	0.299432	0.0491133	0.545686	0.0662534	3.13922	positive	0.867454	0.752476	0.00244619	0.293028	0.34135	0.46987	0.52244	0.89167	0.3876	0.88708	0.92797	0.29833	0.52124	0.106892	0.0614772	0.0997079	6.12383	0.238979	2.87671	3.31737	0	0.0631901
cg08447044	6	165902024	PDE10A	0.16704	0.375924	0.208884	0.00946442	0.431655	0.0662534	3.13922	positive	0.855364	0.731648	0.00327941	0.327102	0.17348	0.19121	0.17995	0.48756	0.30657	0.49157	0.32495	0.17704	0.11352	0.106892	0.0614772	0.0997079	6.12383	0.238979	2.87671	3.31737	0	0.0631901
cg10855945	6	165751905	PDE10A	0.588822	0.831282	0.24246	0.00167924	0.270111	0.0662534	3.13922	positive	0.873859	0.76363	0.00207029	0.27765	0.56778	0.59482	0.63741	0.89691	0.71239	0.90902	0.87253	0.53417	0.60993	0.106892	0.0614772	0.0997079	6.12383	0.238979	2.87671	3.31737	0	0.0631901
cg23205034	8	98116447	PGCP	0.12063	0.580406	0.459776	0.0255073	0.503594	14.1299	31.1788	positive	0.84384	0.712066	0.00423825	0.351047	0.15272	0.10107	0.15243	0.78105	0.27335	0.79261	0.81849	0.07968	0.11725	16.4566	21.2637	8.1397	24.4812	20.9391	44.4957	34.7991	12.9611	11.8283
cg20429833	17	6358427	PITPNM3	0.09546	0.340216	0.244756	0.0109395	0.442664	0.0950003	1.5079	positive	0.893944	0.799137	0.00115147	0.228349	0.09266	0.09095	0.11399	0.3855	0.23479	0.47962	0.41168	0.09761	0.08209	0.119139	0.0454731	0.114558	2.52456	0.292018	2.07142	1.14362	0.105072	0.0907596
cg26799250	17	6358415	PITPNM3	0.20199	0.592688	0.390698	0.0199829	0.489679	0.0950003	1.5079	positive	0.887902	0.78837	0.00138938	0.24224	0.19372	0.22088	0.2396	0.70256	0.39159	0.79085	0.78748	0.17742	0.17833	0.119139	0.0454731	0.114558	2.52456	0.292018	2.07142	1.14362	0.105072	0.0907596
cg08344485	11	125212642	PKNOX2	0.534992	0.798488	0.263496	0.00254721	0.307539	0.215545	4.96476	positive	0.868251	0.75386	0.002397	0.290726	0.59154	0.54177	0.46677	0.82644	0.63517	0.89061	0.87427	0.55646	0.51842	0.219287	0.139978	0.213746	1.7734	1.76765	8.43591	7.8821	0.0989513	0.405764
cg04929165	1	186807235	PLA2G4A	0.38574	0.749654	0.363914	0.00252604	0.307539	0.616465	3.85149	positive	0.907301	0.823196	0.0007286	0.195127	0.45506	0.40697	0.35379	0.82203	0.84611	0.79888	0.76903	0.34386	0.36902	0.567412	0.94604	0.994173	5.58974	3.97614	3.58289	2.25721	0.277187	0.297515
cg25234117	3	155423168	PLCH1	0.66838	0.442004	-0.226376	0.00513407	0.375819	2.49252	0.370532	positive	0.908643	0.825632	0.00069329	0.191938	0.65947	0.56161	0.7124	0.37727	0.45422	0.37015	0.38783	0.68164	0.72678	1.27117	1.52499	3.11108	0.384059	0.747391	0.00857797	0.342102	2.47303	4.08233
cg19431623	10	20142989	PLXDC2	0.617546	0.819844	0.202298	0.0133449	0.460506	1.87397	16.1871	positive	0.947462	0.897685	0.00010394	0.0904443	0.67075	0.5571	0.63444	0.88998	0.61714	0.87197	0.88951	0.55011	0.67533	1.58353	1.55221	0.550183	20.6034	4.03788	17.2013	22.9059	1.8294	3.85453
cg08567517	20	56286603	PMEPA1	0.436922	0.617288	0.180366	0.00648806	0.396258	0.440914	8.4774	positive	0.846155	0.715978	0.00403201	0.34786	0.43901	0.54327	0.40897	0.66896	0.46944	0.6398	0.68582	0.37243	0.42093	0.144179	0.458384	0.271883	15.9633	1.95378	7.48644	8.50609	0.503952	0.82617
cg18537222	3	12435731	PPARG	0.091446	0.600372	0.508926	0.0150323	0.469679	0.238214	2.0132	positive	0.884931	0.783102	0.00151803	0.250043	0.04407	0.19841	0.09557	0.76588	0.44447	0.85278	0.76855	0.0565	0.06268	0.127376	0.292466	0.533434	2.34393	0.597293	3.68693	1.42465	0.0238914	0.213901
cg21792155	3	46940347	PTH1R	0.616036	0.173406	-0.44263	0.00124498	0.247305	2.3266	0.504986	positive	0.852257	0.726342	0.00352148	0.33535	0.56335	0.57016	0.64374	0.20592	0.08642	0.04749	0.11988	0.61371	0.68922	1.42481	1.64752	2.78752	0.138464	1.30781	0.150212	0.423458	2.26894	3.50422
cg11733272	3	46940439	PTH1R	0.870572	0.454012	-0.41656	0.0162881	0.476274	2.3266	0.504986	positive	0.882288	0.778431	0.00163922	0.255877	0.83997	0.85761	0.87468	0.37759	0.57494	0.21335	0.30231	0.86381	0.91679	1.42481	1.64752	2.78752	0.138464	1.30781	0.150212	0.423458	2.26894	3.50422
cg11594731	3	46940212	PTH1R	0.585528	0.156176	-0.429352	0.0033579	0.334532	2.3266	0.504986	positive	0.877684	0.770329	0.00186604	0.26861	0.57127	0.50129	0.59455	0.04665	0.1227	0.01398	0.15435	0.61258	0.64795	1.42481	1.64752	2.78752	0.138464	1.30781	0.150212	0.423458	2.26894	3.50422
cg13607709	3	46940153	PTH1R	0.571956	0.220228	-0.351728	0.00440371	0.358168	2.3266	0.504986	positive	0.883269	0.780165	0.00159345	0.252905	0.52393	0.51957	0.56256	0.16498	0.15118	0.08523	0.21959	0.58319	0.67053	1.42481	1.64752	2.78752	0.138464	1.30781	0.150212	0.423458	2.26894	3.50422
cg06644721	7	136944526	PTN	0.860556	0.486206	-0.37435	0.0459249	0.540996	49.2847	15.0059	positive	0.887969	0.788489	0.00138657	0.24224	0.81345	0.85832	0.83756	0.61584	0.55686	0.15127	0.23515	0.89274	0.90071	50.3758	54.8876	43.3434	21.0208	13.0171	12.6288	13.3569	45.373	52.4439
cg17583432	8	129005567	PVT1	0.07204	0.532874	0.460834	0.0321563	0.51532	2.69597	4.40108	positive	0.919701	0.84585	0.0004463	0.163923	0.0913	0.05897	0.08335	0.801	0.26655	0.73591	0.75038	0.07863	0.04795	3.22713	2.75579	2.4701	4.13444	3.55875	5.05806	4.85307	2.2518	2.77505
cg01765152	8	129005526	PVT1	0.033928	0.513058	0.47913	0.0299282	0.510382	2.69597	4.40108	positive	0.909965	0.828036	0.00065969	0.188241	0.03524	0.04137	0.03602	0.80135	0.24233	0.67786	0.75474	0.03663	0.02038	3.22713	2.75579	2.4701	4.13444	3.55875	5.05806	4.85307	2.2518	2.77505
cg22283754	8	128999428	PVT1	0.46412	0.770508	0.306388	0.00769095	0.414	2.69597	4.40108	positive	0.916761	0.840452	0.00050465	0.169022	0.58996	0.38155	0.40913	0.8795	0.63254	0.91511	0.84978	0.53416	0.4058	3.22713	2.75579	2.4701	4.13444	3.55875	5.05806	4.85307	2.2518	2.77505
cg05907939	8	129055563	PVT1	0.267268	0.601244	0.333976	0.0189876	0.487126	2.69597	4.40108	positive	0.932868	0.870243	0.0002416	0.133847	0.28672	0.36259	0.27312	0.71465	0.47034	0.71915	0.7957	0.23672	0.17719	3.22713	2.75579	2.4701	4.13444	3.55875	5.05806	4.85307	2.2518	2.77505
cg10585321	9	135995491	RALGDS	0.309218	0.484586	0.175368	0.00500619	0.373268	8.52313	11.8277	positive	0.862489	0.743887	0.00276811	0.308575	0.30643	0.3268	0.33044	0.53211	0.44875	0.50882	0.56292	0.2693	0.31312	8.39336	9.58521	6.66469	11.4455	9.96697	12.3321	13.5663	9.03404	8.93837
cg13793782	9	135995093	RALGDS	0.162632	0.351822	0.18919	0.00652781	0.396258	8.52313	11.8277	positive	0.854727	0.730558	0.00332812	0.32883	0.18684	0.19254	0.16114	0.43714	0.30994	0.34278	0.44041	0.16566	0.10698	8.39336	9.58521	6.66469	11.4455	9.96697	12.3321	13.5663	9.03404	8.93837
cg12167688	17	2771225	RAP1GAP2	0.47097	0.293084	-0.177886	0.0263015	0.504392	4.67271	2.8193	positive	0.91837	0.843403	0.0004721	0.165878	0.45219	0.38878	0.51618	0.50208	0.204	0.22273	0.25307	0.45403	0.54367	5.36318	3.57773	4.9936	6.24556	2.00855	1.60095	1.42216	4.836	4.59303
cg18774170	5	80260554	RASGRF2	0.116152	0.444996	0.328844	0.0465439	0.542182	1.35164	5.13462	positive	0.89832	0.806979	0.000998	0.215025	0.11052	0.06565	0.25318	0.68303	0.29868	0.69372	0.4727	0.07652	0.07489	0.489091	2.12787	1.79084	5.29761	1.3169	8.08869	5.83527	1.44152	0.90886
cg27569887	3	30045896	RBMS3	0.119382	0.49045	0.371068	0.0157711	0.473962	6.08988	9.04503	positive	0.92148	0.849125	0.00041337	0.160567	0.15097	0.07975	0.14743	0.69852	0.29249	0.62319	0.60129	0.1424	0.07636	6.29453	7.09535	5.80105	9.75232	6.45245	10.8642	9.11116	5.7176	5.54089
cg02578184	3	29563260	RBMS3	0.49397	0.679747	0.185778	0.0426701	0.534374	6.08988	9.04503	positive	0.912261	0.832221	0.00157938	0.251983	0.61057	0.59555	0.46134	0.8326	0.60506		0.69832	0.38609	0.4163	6.29453	7.09535	5.80105	9.75232	6.45245	10.8642	9.11116	5.7176	5.54089
cg25834692	3	29535414	RBMS3	0.410942	0.803934	0.392992	4.546e-05	0.0829182	6.08988	9.04503	positive	0.885299	0.783755	0.00150165	0.24973	0.4569	0.44746	0.42673	0.87899	0.74798	0.89215	0.78606	0.35342	0.3702	6.29453	7.09535	5.80105	9.75232	6.45245	10.8642	9.11116	5.7176	5.54089
cg19267457	1	64394702	ROR1	0.201782	0.412324	0.210542	0.033443	0.516822	0.851073	10.9119	positive	0.893194	0.797795	0.00117936	0.229776	0.19579	0.21552	0.29082	0.65539	0.297	0.4539	0.3761	0.1579	0.14888	0.874979	0.320566	0.762582	14.505	7.14944	15.191	6.80235	1.58633	0.710906
cg14044388	9	94579826	ROR2	0.0671	0.294888	0.227788	0.0308739	0.513161	0.0966323	9.64022	positive	0.889073	0.79045	0.00134086	0.240323	0.08175	0.048	0.08671	0.34248	0.11708	0.44471	0.42946	0.06559	0.05345	0.129127	0.0390328	0.126115	4.70888	3.82751	19.6026	10.4219	0.0199238	0.168963
cg09047474	6	166871899	RPS6KA2	0.50853	0.700616	0.192086	0.0210894	0.493372	1.4506	16.3904	positive	0.894302	0.799777	0.00113833	0.228158	0.46106	0.47801	0.56304	0.73368	0.50806	0.8047	0.79591	0.49228	0.54826	1.50411	1.15258	0.74032	12.8444	4.2837	31.6706	16.7629	1.46641	2.38957
cg00180909	6	166824474	RPS6KA2	0.350946	0.526508	0.175562	0.0358882	0.520864	1.4506	16.3904	positive	0.917813	0.842381	0.00048319	0.167734	0.32452	0.2875	0.38774	0.54587	0.31924	0.65747	0.60588	0.36422	0.39075	1.50411	1.15258	0.74032	12.8444	4.2837	31.6706	16.7629	1.46641	2.38957
cg22717080	6	166959505	RPS6KA2	0.342312	0.59916	0.256848	0.0458298	0.540819	1.4506	16.3904	positive	0.88897	0.790269	0.00134504	0.240498	0.28399	0.4188	0.3853	0.73582	0.28401	0.8181	0.5929	0.26917	0.3543	1.50411	1.15258	0.74032	12.8444	4.2837	31.6706	16.7629	1.46641	2.38957
cg15321401	6	166884430	RPS6KA2	0.464422	0.815854	0.351432	0.00045845	0.178916	1.4506	16.3904	positive	0.862395	0.743724	0.00277449	0.308575	0.39912	0.52123	0.48867	0.82348	0.73955	0.95153	0.87783	0.36637	0.54672	1.50411	1.15258	0.74032	12.8444	4.2837	31.6706	16.7629	1.46641	2.38957
cg17087907	6	167104677	RPS6KA2	0.101642	0.319966	0.218324	0.041672	0.532741	1.4506	16.3904	positive	0.887906	0.788376	0.00138924	0.24224	0.14703	0.07282	0.13613	0.38258	0.20917	0.45741	0.4667	0.09762	0.05461	1.50411	1.15258	0.74032	12.8444	4.2837	31.6706	16.7629	1.46641	2.38957
cg16077125	6	166959444	RPS6KA2	0.278806	0.585278	0.306472	0.00964206	0.432993	1.4506	16.3904	positive	0.861868	0.742816	0.00281031	0.309548	0.27789	0.3924	0.28167	0.74191	0.39789	0.76534	0.54244	0.17562	0.26645	1.50411	1.15258	0.74032	12.8444	4.2837	31.6706	16.7629	1.46641	2.38957
cg01198887	6	166907883	RPS6KA2	0.547182	0.745534	0.198352	0.0115147	0.448402	1.4506	16.3904	positive	0.836485	0.699707	0.00494139	0.366323	0.47392	0.46479	0.61302	0.81712	0.57665	0.83126	0.80198	0.55338	0.6308	1.50411	1.15258	0.74032	12.8444	4.2837	31.6706	16.7629	1.46641	2.38957
cg15547672	17	78768940	RPTOR	0.894766	0.732266	-0.1625	0.0360294	0.521097	8.92508	7.47509	positive	0.873185	0.762452	0.00210785	0.279057	0.89882	0.87855	0.86428	0.71526	0.81382	0.63921	0.60473	0.90942	0.92276	8.73476	8.31727	9.08173	7.19985	7.84213	7.30654	7.55183	9.26639	9.22526
cg09794615	17	78895206	RPTOR	0.898826	0.711982	-0.186844	0.0291821	0.509043	8.92508	7.47509	positive	0.840115	0.705793	0.00458515	0.358062	0.89821	0.89254	0.87427	0.6514	0.73258	0.74231	0.5431	0.8834	0.94571	8.73476	8.31727	9.08173	7.19985	7.84213	7.30654	7.55183	9.26639	9.22526
cg18965980	17	78699048	RPTOR	0.854432	0.35102	-0.503412	0.00370795	0.342646	8.92508	7.47509	positive	0.849808	0.722174	0.00372065	0.340274	0.87156	0.85781	0.79888	0.5125	0.4339	0.12262	0.16822	0.87054	0.87337	8.73476	8.31727	9.08173	7.19985	7.84213	7.30654	7.55183	9.26639	9.22526
cg09790523	17	78895064	RPTOR	0.875924	0.638572	-0.237351	0.0360794	0.521154	8.92508	7.47509	positive	0.921272	0.848742	0.00114901	0.228349	0.8751	0.83736	0.8364		0.55344	0.52436	0.64927	0.90964	0.92112	8.73476	8.31727	9.08173	7.19985	7.84213	7.30654	7.55183	9.26639	9.22526
cg08254842	16	29324621	RUNDC2C	0.214432	0.448846	0.234414	0.00515031	0.376477	0.041931	1.11352	positive	0.869581	0.756172	0.00231652	0.285948	0.2454	0.2632	0.21067	0.44855	0.3749	0.54213	0.56228	0.19637	0.15652	0.0354658	0.030876	0.0273551	0.455333	0.313225	2.1953	1.49022	0.0984121	0.0175458
cg04194479	16	29324559	RUNDC2C	0.418668	0.637482	0.218814	0.0261157	0.504096	0.041931	1.11352	positive	0.922889	0.851725	0.00038852	0.156967	0.5253	0.41053	0.36574	0.60707	0.48949	0.7994	0.78485	0.416	0.37577	0.0354658	0.030876	0.0273551	0.455333	0.313225	2.1953	1.49022	0.0984121	0.0175458
cg09140114	16	29324813	RUNDC2C	0.118664	0.36925	0.250586	0.00641828	0.395748	0.041931	1.11352	positive	0.891766	0.795247	0.00123367	0.233147	0.25953	0.14741	0.0651	0.33449	0.21913	0.54344	0.41287	0.09035	0.03093	0.0354658	0.030876	0.0273551	0.455333	0.313225	2.1953	1.49022	0.0984121	0.0175458
cg03268697	17	75160330	SEC14L1	0.865652	0.61314	-0.252512	0.0477473	0.543607	41.0274	25.6342	positive	0.900844	0.811519	0.00091629	0.208688	0.87125	0.82797	0.86299	0.50643	0.79037	0.4982	0.40519	0.84168	0.92437	35.336	41.7992	47.6135	29.1998	38.5844	17.9432	16.8095	41.1186	39.2697
cg14031381	17	75181131	SEC14L1	0.838674	0.587494	-0.25118	0.0425835	0.534162	41.0274	25.6342	positive	0.894604	0.800316	0.00112736	0.226973	0.81969	0.82958	0.82807	0.44267	0.81972	0.44879	0.45214	0.86094	0.85509	35.336	41.7992	47.6135	29.1998	38.5844	17.9432	16.8095	41.1186	39.2697
cg08993103	4	25776626	SEL1L3	0.189882	0.583808	0.393926	0.017739	0.4829	0.880265	49.531	positive	0.884618	0.782548	0.00153205	0.25012	0.31377	0.1859	0.13959	0.75423	0.58646	0.73578	0.67257	0.25191	0.05824	0.195832	0.0524891	1.36327	65.3688	10.2648	65.4421	57.0482	0.330372	2.45936
cg03146155	6	134588828	SGK1	0.321614	0.593508	0.271894	0.0291184	0.508963	40.7253	175.9	positive	0.928752	0.862581	0.00029632	0.143707	0.38295	0.3445	0.33747	0.72549	0.42437	0.81509	0.61946	0.26249	0.28066	70.6518	17.1333	27.9585	147.999	89.7247	260.786	205.091	38.7884	49.0945
cg21811204	5	132158625	SHROOM1	0.983564	0.498438	-0.485126	0.0244113	0.501594	3.91094	1.65428	positive	0.943853	0.890859	0.00013069	0.103351	0.97904	0.9786	0.98471	0.33535	0.66138	0.21476	0.31964	0.98512	0.99035	3.67281	3.35967	3.64222	2.02087	2.58668	0.802279	1.20728	4.77813	4.10187
cg12180613	5	132158560	SHROOM1	0.94472	0.54982	-0.3949	0.035862	0.520845	3.91094	1.65428	positive	0.953949	0.910018	6.596e-05	0.0750072	0.93817	0.9381	0.92528	0.4948	0.73104	0.21422	0.37774	0.94405	0.978	3.67281	3.35967	3.64222	2.02087	2.58668	0.802279	1.20728	4.77813	4.10187
cg08912922	5	132161548	SHROOM1	0.806466	0.610948	-0.195518	0.0320061	0.51472	3.91094	1.65428	positive	0.931343	0.867401	0.00026096	0.136819	0.7871	0.84737	0.75659	0.60638	0.65709	0.49091	0.48084	0.79755	0.84372	3.67281	3.35967	3.64222	2.02087	2.58668	0.802279	1.20728	4.77813	4.10187
cg24789467	5	132159003	SHROOM1	0.936992	0.420612	-0.51638	0.0122677	0.45336	3.91094	1.65428	positive	0.951607	0.905556	7.828e-05	0.0799252	0.90741	0.90215	0.94304	0.33161	0.52539	0.09117	0.33939	0.94797	0.98439	3.67281	3.35967	3.64222	2.02087	2.58668	0.802279	1.20728	4.77813	4.10187
cg06900164	5	132158840	SHROOM1	0.875714	0.394792	-0.480922	0.0209894	0.493127	3.91094	1.65428	positive	0.957822	0.917423	4.868e-05	0.0677429	0.8465	0.81695	0.8878	0.30947	0.52666	0.06642	0.2364	0.86678	0.96054	3.67281	3.35967	3.64222	2.02087	2.58668	0.802279	1.20728	4.77813	4.10187
cg13218710	5	132158887	SHROOM1	0.829878	0.404684	-0.425194	0.0390049	0.526568	3.91094	1.65428	positive	0.943382	0.889971	0.0001345	0.104857	0.82346	0.79482	0.8127	0.22777	0.62307	0.09096	0.23752	0.83589	0.88252	3.67281	3.35967	3.64222	2.02087	2.58668	0.802279	1.20728	4.77813	4.10187
cg01546793	11	116913720	SIK3	0.206052	0.591848	0.385796	0.00856384	0.424712	3.22007	5.56463	positive	0.858688	0.737345	0.00303347	0.319176	0.37135	0.17534	0.20736	0.61653	0.55043	0.78373	0.73263	0.17047	0.10574	3.45056	3.27068	2.90512	5.69118	3.31179	7.54639	5.70915	3.63467	2.8393
cg10179569	14	72193535	SIPA1L1	0.33118	0.627006	0.295826	0.039726	0.528259	4.24478	20.59	positive	0.962442	0.926295	3.259e-05	0.056165	0.29242	0.40646	0.35376	0.79298	0.46261	0.7758	0.78761	0.30722	0.29604	3.0873	3.46945	4.15343	24.8303	9.67784	27.477	20.3749	5.17556	5.33817
cg20872692	12	51381135	SLC11A2	0.206918	0.525944	0.319026	0.00497643	0.372187	10.0795	16.2607	positive	0.882538	0.778874	0.00162744	0.255085	0.32714	0.21227	0.18694	0.68949	0.4469	0.6368	0.5304	0.15993	0.14831	9.97737	9.29754	10.5566	16.149	12.755	17.4671	18.6718	10.4854	10.0804
cg15647725	5	1091936	SLC12A7	0.490754	0.688242	0.197488	0.00051565	0.186451	2.55827	5.66729	positive	0.850445	0.723257	0.00366813	0.337805	0.46281	0.54776	0.48014	0.77289	0.62939	0.65505	0.73007	0.44839	0.51467	2.2302	2.53595	2.11739	6.66639	2.18558	6.26318	7.55402	2.55724	3.35059
cg13681701	5	1103910	SLC12A7	0.300782	0.451472	0.15069	0.0171144	0.480872	2.55827	5.66729	positive	0.956551	0.914991	5.395e-05	0.0679618	0.32915	0.33103	0.28979	0.51067	0.31058	0.46181	0.54494	0.25351	0.30043	2.2302	2.53595	2.11739	6.66639	2.18558	6.26318	7.55402	2.55724	3.35059
cg18677871	5	1103325	SLC12A7	0.267754	0.50961	0.241856	0.0210181	0.493198	2.55827	5.66729	positive	0.881934	0.777808	0.00165591	0.256982	0.32322	0.27455	0.2452	0.71569	0.29968	0.55141	0.52493	0.27743	0.21837	2.2302	2.53595	2.11739	6.66639	2.18558	6.26318	7.55402	2.55724	3.35059
cg25213968	3	124904931	SLC12A8	0.18471	0.376508	0.191798	0.00357861	0.340204	1.83032	20.7815	positive	0.93316	0.870789	0.00023801	0.133049	0.20755	0.23486	0.17365	0.44818	0.25984	0.37872	0.45482	0.14536	0.16213	2.16795	0.923862	2.12403	31.7105	12.5292	17.6663	21.2201	2.03029	1.90549
cg18741958	3	124913784	SLC12A8	0.15459	0.371932	0.217342	0.0155609	0.473071	1.83032	20.7815	positive	0.930774	0.86634	0.00026847	0.138518	0.14404	0.18372	0.18026	0.5428	0.23846	0.45465	0.31254	0.12126	0.14367	2.16795	0.923862	2.12403	31.7105	12.5292	17.6663	21.2201	2.03029	1.90549
cg11560431	6	3416406	SLC22A23	0.330325	0.578888	0.248563	0.00625301	0.393489	0.427593	7.99599	positive	0.914818	0.836893	0.00144814	0.245782		0.246	0.36749	0.71611	0.43881	0.67556	0.57805	0.36225	0.34556	0.625561	0.127336	0.419962	7.77866	4.26754	9.92525	10.0125	0.292651	0.672454
cg07081061	6	3350901	SLC22A23	0.514364	0.728752	0.214388	0.0154969	0.472911	0.427593	7.99599	positive	0.91914	0.844818	0.00045705	0.164671	0.5552	0.59879	0.49226	0.80566	0.53325	0.81795	0.82125	0.46071	0.46486	0.625561	0.127336	0.419962	7.77866	4.26754	9.92525	10.0125	0.292651	0.672454
cg09127107	6	3438702	SLC22A23	0.069726	0.382202	0.312476	0.0335194	0.516822	0.427593	7.99599	positive	0.872761	0.761712	0.00213168	0.279812	0.07022	0.08642	0.08314	0.70125	0.23095	0.44427	0.40712	0.06661	0.04224	0.625561	0.127336	0.419962	7.77866	4.26754	9.92525	10.0125	0.292651	0.672454
cg02904554	6	3404079	SLC22A23	0.240686	0.58313	0.342444	0.00126934	0.248774	0.427593	7.99599	positive	0.940854	0.885206	0.00015633	0.112117	0.38845	0.19519	0.18095	0.64535	0.49826	0.66822	0.68927	0.28672	0.15212	0.625561	0.127336	0.419962	7.77866	4.26754	9.92525	10.0125	0.292651	0.672454
cg08057475	15	45803341	SLC30A4	0.216876	0.680364	0.463488	0.00684174	0.402296	2.74304	3.72519	positive	0.846771	0.717021	0.00397827	0.346712	0.25737	0.31765	0.20781	0.8357	0.50118	0.86606	0.80876	0.1654	0.13615	2.63773	2.5593	2.69732	4.11994	3.13431	3.80131	3.8452	2.44624	3.3746
cg15586392	8	142238691	SLC45A4	0.045628	0.363644	0.318016	0.0355378	0.519747	0.961324	1.55036	positive	0.856386	0.733397	0.00320239	0.324271	0.04661	0.04716	0.06076	0.45155	0.1774	0.59273	0.52712	0.04225	0.03136	0.828574	1.07649	0.937856	1.86958	1.26247	1.42067	1.64872	0.879559	1.08414
cg01081737	8	142238752	SLC45A4	0.053108	0.240436	0.187328	0.0321781	0.515415	0.961324	1.55036	positive	0.877736	0.77042	0.00186337	0.268342	0.06536	0.05879	0.06685	0.33345	0.11154	0.35982	0.31158	0.04953	0.02501	0.828574	1.07649	0.937856	1.86958	1.26247	1.42067	1.64872	0.879559	1.08414
cg07769015	8	142238770	SLC45A4	0.065944	0.298218	0.232274	0.0344207	0.518143	0.961324	1.55036	positive	0.946106	0.895117	0.00011349	0.0947487	0.05669	0.08258	0.08167	0.45303	0.14896	0.34768	0.44284	0.06627	0.04251	0.828574	1.07649	0.937856	1.86958	1.26247	1.42067	1.64872	0.879559	1.08414
cg07438246	3	14446645	SLC6A6	0.861966	0.535296	-0.32667	0.0224291	0.496242	19.7319	11.0981	positive	0.860169	0.739891	0.00292806	0.314023	0.87282	0.8525	0.86613	0.64986	0.82068	0.35514	0.33902	0.82358	0.8948	20.4573	17.0607	18.4832	12.3326	14.047	7.38412	10.6288	22.7336	19.9248
cg23247185	3	14530356	SLC6A6	0.815698	0.637274	-0.178424	0.0386506	0.526075	19.7319	11.0981	positive	0.863347	0.745368	0.00271049	0.306224	0.78213	0.83364	0.79863	0.61843	0.81627	0.48942	0.53985	0.81358	0.85051	20.4573	17.0607	18.4832	12.3326	14.047	7.38412	10.6288	22.7336	19.9248
cg09296536	2	40392494	SLC8A1	0.864206	0.710152	-0.154054	0.0186387	0.486516	21.2673	3.36127	positive	0.917202	0.841259	0.0004956	0.168201	0.82705	0.85794	0.85211	0.6607	0.74206	0.58992	0.71555	0.87334	0.91059	20.3562	19.5557	13.2199	3.60054	4.51556	0.795956	4.53301	26.2176	26.987
cg18364770	5	168310523	SLIT3	0.162694	0.331736	0.169042	0.0135629	0.461635	0.603632	17.9119	positive	0.851373	0.724837	0.00359248	0.336922	0.16918	0.1433	0.14559	0.3791	0.16208	0.36272	0.40029	0.22941	0.12599	1.04645	0.220489	0.605505	35.6819	1.35481	20.3007	14.31	0.149988	0.995727
cg26686068	4	7700686	SORCS2	0.12463	0.285796	0.161166	0.0234532	0.498387	0.0776301	3.32069	positive	0.838201	0.702581	0.00477071	0.361449	0.14251	0.14889	0.12473	0.39674	0.18534	0.29531	0.37825	0.13469	0.07233	0.0529252	0.117128	0.0322953	7.07875	0.49223	3.866	1.84576	0.132772	0.0530298
cg07173218	1	9410333	SPSB1	0.167892	0.542262	0.37437	0.0284026	0.507815	8.91571	15.6437	positive	0.851157	0.724468	0.00361003	0.337083	0.23085	0.16363	0.16186	0.74816	0.36341	0.63049	0.77163	0.13938	0.14374	8.88473	7.50794	7.47754	20.3523	11.2107	16.3916	14.6201	7.49692	13.2114
cg00149537	1	9409810	SPSB1	0.078886	0.614668	0.535782	0.0170314	0.479867	8.91571	15.6437	positive	0.839838	0.705328	0.00461169	0.358782	0.08539	0.09536	0.09585	0.82911	0.37625	0.81644	0.85376	0.08625	0.03158	8.88473	7.50794	7.47754	20.3523	11.2107	16.3916	14.6201	7.49692	13.2114
cg01613249	2	54727293	SPTBN1	0.26909	0.447194	0.178104	0.0149527	0.469448	31.7325	66.5905	positive	0.850252	0.722928	0.00368402	0.338418	0.34898	0.32196	0.23637	0.6054	0.42052	0.32754	0.48227	0.20183	0.23631	33.9045	27.2294	29.3807	85.7164	59.2565	62.8551	58.5342	33.3222	34.8257
cg16017979	8	74333589	STAU2	0.070168	0.563042	0.492874	0.0231698	0.497815	10.8185	14.432	positive	0.838291	0.702732	0.00476185	0.361449	0.06362	0.0737	0.0974	0.78795	0.36403	0.82603	0.71803	0.06494	0.05118	12.4696	11.7241	10.6191	16.2099	12.0957	17.1329	12.2894	9.34529	9.93429
cg27612126	4	5220286	STK32B	0.880894	0.62172	-0.259174	0.0274904	0.5061	9.35815	3.35834	positive	0.886204	0.785357	0.00146195	0.246678	0.89429	0.89631	0.85133	0.59919	0.80087	0.55542	0.37809	0.84755	0.91499	12.0544	9.55711	10.6074	1.62046	10.2035	0.787696	0.821687	6.45892	8.11291
cg17428896	10	29938708	SVIL	0.257502	0.44657	0.189068	0.0326984	0.516141	1.63803	10.6112	positive	0.907994	0.824452	0.00071023	0.192744	0.30972	0.23263	0.31351	0.53037	0.33925	0.46446	0.61502	0.28742	0.14423	1.86415	3.06488	1.13499	9.31495	5.07688	12.781	15.2718	1.50306	0.623074
cg08103144	5	150028986	SYNPO	0.382198	0.566688	0.18449	0.0150913	0.470032	5.03963	57.2112	positive	0.853356	0.728216	0.00343452	0.332401	0.454	0.43837	0.32505	0.59445	0.50022	0.7047	0.61218	0.3351	0.35847	7.67358	5.13826	2.86949	39.8468	24.5142	67.8407	96.6433	5.69372	3.82312
cg10786043	8	38643568	TACC1	0.676862	0.404276	-0.272586	0.0382118	0.524687	46.1793	18.1707	positive	0.936999	0.877967	0.00019424	0.122506	0.67391	0.67763	0.68888	0.25477	0.52572	0.19046	0.36486	0.62313	0.72076	49.9308	38.2638	51.5592	18.4137	27.5384	12.1741	14.5567	44.3744	46.7682
cg02345321	8	38597616	TACC1	0.550948	0.225304	-0.325644	0.00692502	0.403676	46.1793	18.1707	positive	0.872381	0.761048	0.00215324	0.280671	0.41422	0.59792	0.57407	0.22566	0.14118	0.10451	0.15298	0.53018	0.63835	49.9308	38.2638	51.5592	18.4137	27.5384	12.1741	14.5567	44.3744	46.7682
cg00810292	13	75900518	TBC1D4	0.946684	0.366616	-0.580068	0.0209955	0.493127	9.49764	6.35435	positive	0.848251	0.71953	0.00385124	0.343155	0.93698	0.9265	0.93631	0.30421	0.49459	0.04599	0.08186	0.96458	0.96905	9.90845	8.20806	11.4421	7.36563	6.45973	5.92503	5.66699	9.43263	8.49695
cg13121428	14	76446161	TGFB3	0.180024	0.702522	0.522498	0.00317615	0.328728	0.637486	2.58102	positive	0.848592	0.720108	0.00382243	0.342545	0.20383	0.18432	0.23089	0.56725	0.83513	0.8408	0.84249	0.12962	0.15146	0.596722	1.19664	0.290603	2.19013	2.44326	3.95826	1.73244	0.494143	0.609322
cg08615333	14	76447413	TGFB3	0.245668	0.527476	0.281808	0.00013461	0.116801	0.637486	2.58102	positive	0.917402	0.841626	0.00049151	0.168201	0.22969	0.27059	0.31306	0.52957	0.46565	0.64539	0.48819	0.17171	0.24329	0.596722	1.19664	0.290603	2.19013	2.44326	3.95826	1.73244	0.494143	0.609322
cg02057912	14	76446433	TGFB3	0.085426	0.299324	0.213898	0.0119996	0.451908	0.637486	2.58102	positive	0.856291	0.733235	0.00320949	0.324547	0.10016	0.09497	0.09923	0.34178	0.17636	0.4363	0.35022	0.0709	0.06187	0.596722	1.19664	0.290603	2.19013	2.44326	3.95826	1.73244	0.494143	0.609322
cg18183618	3	170894132	TNIK	0.112896	0.560534	0.447638	0.0390771	0.52674	5.04946	17.2286	positive	0.924566	0.854821	0.00036037	0.153258	0.16946	0.07453	0.14065	0.83979	0.21124	0.7649	0.80376	0.1033	0.07654	6.51192	6.26903	5.49417	25.4501	10.5218	13.8293	19.1131	3.91611	3.05607
cg18052528	3	170975382	TNIK	0.118982	0.545798	0.426816	0.0424862	0.534162	5.04946	17.2286	positive	0.888854	0.790061	0.00134983	0.240498	0.17082	0.09626	0.11227	0.85502	0.32137	0.85928	0.57456	0.1579	0.05766	6.51192	6.26903	5.49417	25.4501	10.5218	13.8293	19.1131	3.91611	3.05607
cg06420129	16	24831018	TNRC6A	0.639482	0.378504	-0.260978	0.00484265	0.37011	15.7917	11.5716	positive	0.845245	0.714438	0.00411226	0.349994	0.67658	0.63175	0.65099	0.44052	0.19539	0.34295	0.45239	0.581	0.65709	16.8989	13.5596	16.7133	12.5564	11.6188	10.2384	11.8726	16.0574	15.7293
cg23768860	7	47472944	TNS3	0.870832	0.460954	-0.409878	0.0214777	0.494504	43.1655	23.6236	positive	0.926951	0.859237	0.00032281	0.148676	0.8946	0.861	0.82558	0.37053	0.62912	0.18182	0.3177	0.89257	0.88041	48.3445	39.093	37.8022	22.7007	45.7989	11.5795	14.4153	46.3056	44.282
cg01827999	17	17791914	TOM1L2	0.340066	0.505058	0.164992	0.0342557	0.517954	10.7591	13.3589	positive	0.922937	0.851813	0.0003877	0.156967	0.42889	0.29854	0.3129	0.60038	0.3278	0.62278	0.52694	0.34592	0.31408	12.3866	9.49991	9.98915	14.2896	11.5253	14.052	13.5686	10.2605	11.6591
cg07211044	8	60032983	TOX	0.753238	0.420714	-0.332524	0.019269	0.487421	3.14516	0.617034	positive	0.858482	0.736992	0.0030483	0.31954	0.69213	0.75122	0.73366	0.32321	0.48539	0.25763	0.28667	0.73078	0.8584	3.33814	1.47048	2.46778	0.933667	1.30952	0.0645648	0.160386	4.34542	4.10398
cg14905634	12	73057369	TRHDE	0.62773	0.468112	-0.159618	0.01872	0.486549	14.1817	3.19971	positive	0.870604	0.75795	0.00225594	0.285078	0.65287	0.73418	0.60673	0.44788	0.50583	0.36183	0.41203	0.57025	0.57462	10.9468	16.2348	13.6221	2.48073	6.72359	1.51852	2.07602	17.3537	12.7513
cg21552292	5	14316516	TRIO	0.825544	0.62018	-0.205364	0.0302706	0.51131	50.889	36.3808	positive	0.910936	0.829804	0.00063574	0.184639	0.81436	0.83085	0.80761	0.64652	0.66124	0.44007	0.53659	0.80388	0.87102	49.5392	48.9551	51.68	38.5896	35.8941	29.0704	41.969	49.533	54.7378
cg23024102	13	45149706	TSC22D1	0.214864	0.441236	0.226372	0.0203259	0.491158	15.7633	59.6056	positive	0.903111	0.815609	0.00084697	0.201958	0.27022	0.23112	0.18945	0.53227	0.30618	0.60585	0.4786	0.2291	0.15443	17.0898	19.7766	13.809	61.5772	26.3579	64.725	85.7624	14.0253	14.1159
cg11570656	13	45149702	TSC22D1	0.154386	0.362702	0.208316	0.0426958	0.534397	15.7633	59.6056	positive	0.939693	0.883024	0.00016714	0.114879	0.17736	0.20887	0.13668	0.53325	0.21396	0.42669	0.47064	0.15734	0.09168	17.0898	19.7766	13.809	61.5772	26.3579	64.725	85.7624	14.0253	14.1159
cg20886049	11	76493545	TSKU	0.221266	0.40201	0.180744	0.0235007	0.498531	5.4282	15.9644	positive	0.905392	0.819735	0.00078099	0.197968	0.23439	0.27811	0.23983	0.38298	0.23227	0.47906	0.54399	0.18785	0.16615	5.487	6.60398	4.6945	16.9946	11.0248	15.566	20.2721	4.03095	6.32456
cg04610274	11	76504541	TSKU	0.268224	0.522858	0.254634	0.00148417	0.258817	5.4282	15.9644	positive	0.919523	0.845522	0.00044969	0.163923	0.29184	0.23286	0.26685	0.62786	0.41873	0.47086	0.52631	0.28833	0.26124	5.487	6.60398	4.6945	16.9946	11.0248	15.566	20.2721	4.03095	6.32456
cg09353563	15	70994435	UACA	0.797762	0.415482	-0.38228	0.00291884	0.320327	67.6084	18.8831	positive	0.886581	0.786026	0.0014456	0.245782	0.81499	0.78151	0.81675	0.51982	0.44983	0.34388	0.21158	0.75332	0.82224	78.6528	53.7482	74.3596	20.1883	27.285	14.209	13.8501	80.3551	50.9264
cg10000764	7	129494118	UBE2H	0.104684	0.4125	0.307816	0.0392498	0.527288	39.9421	61.0832	positive	0.8592	0.738225	0.00299674	0.316729	0.08038	0.11957	0.13087	0.53691	0.27808	0.63116	0.53955	0.06952	0.12308	38.7346	56.8031	34.5673	69.1599	47.2906	71.9389	55.9433	30.2099	39.3954
cg23828170	6	149099724	UST	0.506114	0.671314	0.1652	0.0287543	0.508094	2.72165	10.7414	positive	0.891934	0.795546	0.00122719	0.232857	0.50089	0.44103	0.54369	0.70236	0.50984	0.8103	0.72373	0.48179	0.56317	4.37821	3.80309	1.69373	8.84561	4.14026	14.7571	15.2228	1.34339	2.38985
cg25965498	3	11746491	VGLL4	0.64347	0.852114	0.208644	5.781e-05	0.0878215	13.7809	27.4351	positive	0.884655	0.782614	0.00153038	0.25012	0.61248	0.71711	0.63827	0.85215	0.90308	0.88591	0.80581	0.61393	0.63556	14.825	19.1205	9.50534	24.0316	23.9914	36.0761	25.6411	11.345	14.1087
cg14720543	3	11611878	VGLL4	0.35869	0.66955	0.31086	0.0196023	0.488622	13.7809	27.4351	positive	0.856048	0.732818	0.00322776	0.325533	0.41063	0.39622	0.35712	0.82563	0.41991	0.86558	0.70163	0.29572	0.33376	14.825	19.1205	9.50534	24.0316	23.9914	36.0761	25.6411	11.345	14.1087
cg21864304	3	11746722	VGLL4	0.742974	0.906054	0.16308	0.00089321	0.222543	13.7809	27.4351	positive	0.879139	0.772885	0.00179214	0.264706	0.7102	0.80806	0.69131	0.84685	0.97307	0.95043	0.87304	0.75936	0.74594	14.825	19.1205	9.50534	24.0316	23.9914	36.0761	25.6411	11.345	14.1087
cg22841079	3	11617586	VGLL4	0.306002	0.530042	0.22404	0.0168617	0.479095	13.7809	27.4351	positive	0.898729	0.807714	0.00098442	0.213949	0.35044	0.3666	0.28709	0.6103	0.4304	0.65372	0.61092	0.28891	0.23697	14.825	19.1205	9.50534	24.0316	23.9914	36.0761	25.6411	11.345	14.1087
cg15617609	12	123352774	VPS37B	0.843968	0.54928	-0.294688	0.0261915	0.504148	18.8989	12.5455	positive	0.865804	0.749616	0.00255015	0.298966	0.83638	0.74198	0.83896	0.55965	0.61321	0.31859	0.41673	0.85396	0.94856	16.5586	21.3861	20.4277	13.9886	15.6982	9.27334	11.2219	17.2393	18.8826
cg19979750	12	123352680	VPS37B	0.807838	0.630152	-0.177686	0.0453493	0.540325	18.8989	12.5455	positive	0.893522	0.798382	0.0011671	0.229203	0.82792	0.81278	0.77551	0.64406	0.62262	0.47013	0.56376	0.77203	0.85095	16.5586	21.3861	20.4277	13.9886	15.6982	9.27334	11.2219	17.2393	18.8826
cg27527630	7	29923538	WIPF3	0.057278	0.524784	0.467506	0.0467023	0.542374	0.118836	16.2349	positive	0.944971	0.892969	0.00012194	0.0990304	0.06911	0.06814	0.06756	0.44656	0.24789	0.93842	0.87345	0.04784	0.03374	0.0582968	0.105007	0.0758008	2.82399	7.39683	32.4285	22.2901	0.0828318	0.272246
cg00193963	7	29923832	WIPF3	0.054792	0.294944	0.240152	0.0226549	0.496671	0.118836	16.2349	positive	0.905304	0.819576	0.00078346	0.198441	0.05254	0.05561	0.08134	0.23267	0.32311	0.50174	0.3265	0.05459	0.02988	0.0582968	0.105007	0.0758008	2.82399	7.39683	32.4285	22.2901	0.0828318	0.272246
cg20745684	7	29923339	WIPF3	0.208896	0.546136	0.33724	0.0488687	0.545453	0.118836	16.2349	positive	0.963223	0.927798	3.03e-05	0.0543061	0.21284	0.23124	0.22091	0.40398	0.30644	0.85588	0.82196	0.19292	0.18657	0.0582968	0.105007	0.0758008	2.82399	7.39683	32.4285	22.2901	0.0828318	0.272246
cg07891179	7	29923883	WIPF3	0.107954	0.498456	0.390502	0.010623	0.441197	0.118836	16.2349	positive	0.912989	0.833549	0.00058711	0.179786	0.11071	0.10732	0.13511	0.46584	0.40091	0.78217	0.57699	0.10123	0.0854	0.0582968	0.105007	0.0758008	2.82399	7.39683	32.4285	22.2901	0.0828318	0.272246
cg20576160	8	17016860	ZDHHC2	0.825176	0.55258	-0.272596	0.0176816	0.482707	23.5834	11.8517	positive	0.856381	0.733388	0.0032028	0.324271	0.82394	0.83212	0.81158	0.50479	0.54747	0.54118	0.36537	0.79837	0.85987	22.3796	26.084	27.9492	15.0575	18.0743	7.01641	7.25867	20.5553	20.9489
cg17679987	8	106535882	ZFPM2	0.189576	0.496076	0.3065	0.0261892	0.504148	1.1022	11.2667	positive	0.901803	0.813248	0.0008865	0.206317	0.18021	0.14219	0.19523	0.63214	0.31688	0.70779	0.58962	0.34196	0.08829	0.569823	0.693313	1.88366	9.56692	2.85137	19.4706	13.1781	0.571573	1.79264
cg10235453	16	88497293	ZNF469	0.106712	0.42587	0.319158	0.0270654	0.505579	3.69855	9.70344	positive	0.89977	0.809586	0.00095045	0.211355	0.11682	0.12864	0.11532	0.36228	0.288	0.60885	0.68073	0.10439	0.06839	2.60066	2.96625	2.39114	9.08575	4.76801	9.58388	15.3761	5.62925	4.90546
cg03314029	16	88496788	ZNF469	0.033186	0.56477	0.531584	0.0210859	0.493372	3.69855	9.70344	positive	0.845794	0.715368	0.00406367	0.348446	0.02115	0.07102	0.02743	0.45846	0.43325	0.93596	0.8466	0.03308	0.01325	2.60066	2.96625	2.39114	9.08575	4.76801	9.58388	15.3761	5.62925	4.90546

## Sheet: S5B Table
id_tile	chr	start_tile	end_tile	reg_element	all_gene	all probes	mean fractional methyl. norm	mean fractional methyl. Endometriosis	methylation diff	Methyl ttest	Methyl FDR	mean FPKM norm	mean FPKM endometriosis	Correlation direction	Rho correlation coefficient	R square	p-value	FDR	FPKM_tb7575_norm	FPKM_tb7576_norm	FPKM_tb7577_norm	FPKM_tb7578_endom	FPKM_tb7579_endom	FPKM_tb7580_endom	FPKM_tb9107_endom	FPKM_tb9110_norm	FPKM_tb9112_norm	Methyl_tb7575_norm	Methyl_tb7576_norm	Methyl_tb7577_norm	Methyl_tb7578_endom	Methyl_tb7579_endom	Methyl_tb7580_endom	Methyl_tb9107_endom	Methyl_tb9110_norm	Methyl_tb9112_norm
chr5:148585706-148585706_1	5	148585456	148585956	enhancer	ABLIM3	cg10574431	0.07683	0.379735	0.247538	0.0439713	0.404243	19.3106	7.31021	negative	-0.900437	0.810786	0.00092914	0.199809	15.2034	18.2508	21.4753	6.34973	11.7747	0.982327	10.1341	23.1978	18.4255	0.07653	0.07895	0.10925	0.52402	0.15565	0.4935	0.34577	0.05492	0.0645
chr17:907643-907886_1	17	907514	908014	enhancer	ABR	cg02384911;cg09580592;cg25027863;cg19029445	0.772787	0.510038	-0.208215	0.0244499	0.37067	13.1163	18.9298	negative	-0.922421	0.85086	0.00039667	0.150382	11.9078	14.3073	14.4922	21.8453	14.9661	20.041	18.8668	12.6827	12.1917	0.747733	0.784552	0.759485	0.474655	0.608718	0.48756	0.469218	0.756983	0.815183
chr11:116708064-116708658_2	11	116708364	116708864	enh_prom	APOA1	cg26734040;cg09558982	0.678082	0.404495	-0.28273	0.00372335	0.244076	0.0438815	12.5889	negative	-0.961634	0.92474	3.508e-05	0.0600843	0	0	0	7.95968	1.1453	21.9666	19.284	0.165098	0.0543094	0.69537	0.71845	0.63627	0.46999	0.54801	0.26622	0.33376	0.66352	0.6768
chr11:116708064-116708658_1	11	116707964	116708464	enh_prom	APOA1	cg03010018;cg19324627	0.787098	0.527291	-0.242885	0.0134738	0.335861	0.0438815	12.5889	negative	-0.96314	0.927638	3.054e-05	0.0578985	0	0	0	7.95968	1.1453	21.9666	19.284	0.165098	0.0543094	0.798945	0.74593	0.77415	0.542095	0.729915	0.385505	0.45165	0.76806	0.848405
chr5:142444988-142444988_1	5	142444738	142445238	enhancer	ARHGAP26	cg00997251	0.600436	0.0978675	-0.48865	2.764e-06	0.0241954	0.675617	1.59078	negative	-0.873612	0.763199	0.00208398	0.256404	0.448196	0.773408	0.489976	1.18867	1.39875	1.92443	1.85128	1.01861	0.647897	0.60918	0.67142	0.56953	0.04445	0.19198	0.09873	0.05631	0.5024	0.64965
chr5:142422241-142422241_1	5	142421991	142422491	enhancer	ARHGAP26	cg11796181	0.89171	0.570917	-0.26124	0.027752	0.375891	0.675617	1.59078	negative	-0.88605	0.785085	0.00146864	0.227047	0.448196	0.773408	0.489976	1.18867	1.39875	1.92443	1.85128	1.01861	0.647897	0.89352	0.883	0.88639	0.55079	0.75535	0.52689	0.45064	0.86244	0.9332
chr11:73073308-73073933_1	11	73073208	73073708	enh_prom	ARHGEF17	cg23460145	0.375044	0.557635	0.16038	0.00214906	0.205908	34.7369	15.3221	negative	-0.842141	0.709202	0.00439413	0.339042	30.2967	26.1147	31.1143	14.8256	21.132	10.7302	14.6006	44.8428	41.3162	0.40148	0.43532	0.35111	0.55878	0.59698	0.49462	0.58016	0.35328	0.33403
chr11:73043425-73043925_1	11	73043325	73043825	enh_prom	ARHGEF17	cg07648709	0.116528	0.408448	0.232646	0.0316929	0.38306	34.7369	15.3221	negative	-0.893367	0.798105	0.00117288	0.211851	30.2967	26.1147	31.1143	14.8256	21.132	10.7302	14.6006	44.8428	41.3162	0.12887	0.12611	0.13809	0.36502	0.28092	0.52636	0.46149	0.11531	0.07426
chr11:73036247-73036247_1	11	73035997	73036497	enhancer	ARHGEF17	cg06059409;cg06640773	0.096538	0.48328	0.31506	0.030071	0.380409	34.7369	15.3221	negative	-0.875949	0.767286	0.0019569	0.253298	30.2967	26.1147	31.1143	14.8256	21.132	10.7302	14.6006	44.8428	41.3162	0.11418	0.09776	0.11299	0.4558	0.26419	0.64185	0.57128	0.09583	0.06193
chr11:73021051-73021551_1	11	73020951	73021451	enh_prom	ARHGEF17	cg14108978	0.224018	0.720755	0.39949	0.0333402	0.386203	34.7369	15.3221	negative	-0.884227	0.781857	0.00154967	0.232076	30.2967	26.1147	31.1143	14.8256	21.132	10.7302	14.6006	44.8428	41.3162	0.26617	0.19318	0.28479	0.72152	0.42983	0.91728	0.81439	0.18293	0.19302
chr3:56810151-56810749_1	3	56810051	56810551	enhancer	ARHGEF3	cg15012214;cg12325605	0.772265	0.449184	-0.29745	0.00036381	0.109613	1.11087	4.56845	negative	-0.853705	0.728812	0.00340719	0.310789	1.3114	1.59562	1.20478	7.05214	4.34883	4.17696	2.69588	0.650199	0.792359	0.740505	0.746485	0.80939	0.45555	0.366025	0.43917	0.53599	0.732105	0.83284
chr19:932536-933036_1	19	932436	932936	enh_prom	ARID3A	cg02695969;cg26857315	0.061551	0.550075	0.40641	0.0228285	0.366852	9.62694	4.21134	negative	-0.894182	0.799562	0.00114272	0.210408	7.50772	7.26168	9.6047	4.47658	7.66735	1.3704	3.33102	12.9486	10.812	0.05544	0.092505	0.06966	0.573925	0.258825	0.710275	0.657275	0.05669	0.03346
chr19:941824-942324_1	19	941724	942224	enh_prom	ARID3A	cg01950129	0.535556	0.701812	0.155596	0.035711	0.389911	9.62694	4.21134	negative	-0.844213	0.712696	0.0042045	0.333547	7.50772	7.26168	9.6047	4.47658	7.66735	1.3704	3.33102	12.9486	10.812	0.47308	0.58816	0.56285	0.72494	0.51251	0.78844	0.78136	0.46944	0.58425
chr19:940624-941124_1	19	940524	941024	enh_prom	ARID3A	cg02001279;cg12713583	0.110385	0.510047	0.346595	0.00479002	0.261977	9.62694	4.21134	negative	-0.860876	0.741107	0.0028787	0.291117	7.50772	7.26168	9.6047	4.47658	7.66735	1.3704	3.33102	12.9486	10.812	0.147765	0.108315	0.12756	0.52408	0.374995	0.54375	0.597365	0.11219	0.056095
chr19:951681-951681_1	19	951431	951931	enhancer	ARID3A	cg22035959	0.022418	0.31004	0.233478	0.0347464	0.388441	9.62694	4.21134	negative	-0.871801	0.760038	0.00218636	0.260722	7.50772	7.26168	9.6047	4.47658	7.66735	1.3704	3.33102	12.9486	10.812	0.02399	0.02572	0.01012	0.34948	0.11891	0.42336	0.34841	0.04418	0.00808
chr19:941024-941524_1	19	940924	941424	enh_prom	ARID3A	cg02001279	0.125914	0.530025	0.361896	0.00074107	0.145161	9.62694	4.21134	negative	-0.855783	0.732365	0.0032477	0.30485	7.50772	7.26168	9.6047	4.47658	7.66735	1.3704	3.33102	12.9486	10.812	0.19142	0.11448	0.14215	0.55376	0.43499	0.56662	0.56473	0.12113	0.06039
chr10:63776828-63776828_1	10	63776578	63777078	enhancer	ARID5B	cg18522931	0.08687	0.497823	0.336556	0.0381185	0.393106	52.5461	33.109	negative	-0.852874	0.727394	0.00347247	0.312111	62.2317	53.3685	39.9684	23.2277	38.2766	35.3048	35.627	52.6592	54.5028	0.07938	0.12176	0.12127	0.68931	0.19318	0.56811	0.54069	0.05782	0.05412
chr11:75061588-75062282_1	11	75061488	75061988	enh_prom_ins	ARRB1	cg02449461	0.374142	0.545018	0.156296	0.016096	0.3489	6.2675	4.61641	negative	-0.851691	0.725378	0.00356683	0.315097	5.8365	7.61273	5.94857	3.78952	7.79082	4.18925	2.69605	5.79086	6.14883	0.33144	0.36302	0.39645	0.59445	0.41196	0.53372	0.63994	0.37657	0.40323
chr5:78094446-78094446_1	5	78094196	78094696	enhancer	ARSB	cg11577898	0.848526	0.616812	-0.186552	0.0182899	0.357471	10.2211	15.5751	negative	-0.904741	0.818556	0.00079945	0.187713	10.0403	9.7217	11.0306	13.5586	12.7586	15.8373	20.1459	9.73994	10.573	0.8247	0.88093	0.80835	0.61602	0.66276	0.65365	0.53482	0.84361	0.88504
chr8:131154466-131154466_1	8	131154216	131154716	enhancer	ASAP1	cg04165366	0.245394	0.693418	0.367408	0.0119958	0.32583	52.2268	37.5749	negative	-0.842568	0.709921	0.0043546	0.337537	58.1947	44.8661	50.2941	42.436	43.8213	28.4489	35.5933	57.605	50.174	0.17883	0.41934	0.28195	0.74096	0.69406	0.80186	0.53679	0.19382	0.15303
chr13:113416621-113416621_1	13	113416371	113416871	enhancer	ATP11A	cg27391403	0.829756	0.4256	-0.33403	0.0113402	0.32276	5.26886	11.0742	negative	-0.842877	0.710441	0.00432618	0.336303	4.60375	4.46004	5.67737	11.8027	7.74628	15.0124	9.73538	6.96448	4.63868	0.82836	0.83162	0.82987	0.47821	0.36657	0.35574	0.50188	0.80374	0.85519
chr7:34076103-34076103_1	7	34075853	34076353	enhancer	BMPER	cg05921889	0.899814	0.575237	-0.264744	0.0387702	0.394267	2.36067	12.2812	negative	-0.868588	0.754445	0.00237646	0.269483	1.70574	2.00695	4.82077	24.492	7.64718	10.2065	6.77914	1.57671	1.6932	0.88906	0.90243	0.8436	0.38859	0.77812	0.63166	0.50258	0.92633	0.93765
chr14:93725377-93725377_1	14	93725127	93725627	enhancer	BTBD7	cg01715680	0.035438	0.27602	0.19481	0.0314936	0.382839	11.3957	8.8998	negative	-0.876117	0.767581	0.00194794	0.253298	11.1903	9.95412	11.9318	9.82504	9.25961	8.76452	7.75003	11.8373	12.0648	0.03633	0.0557	0.03849	0.29801	0.15149	0.25724	0.39734	0.03765	0.00902
chr14:93735925-93735925_1	14	93735675	93736175	enhancer	BTBD7	cg03505817	0.237114	0.580105	0.31159	0.00485987	0.263564	11.3957	8.8998	negative	-0.88395	0.781367	0.00156225	0.232481	11.1903	9.95412	11.9318	9.82504	9.25961	8.76452	7.75003	11.8373	12.0648	0.14526	0.34415	0.22261	0.57258	0.39116	0.62088	0.7358	0.32963	0.14392
chr3:15687271-15687271_1	3	15687021	15687521	enhancer	BTD	cg21634628	0.064944	0.597622	0.43238	0.0245891	0.371036	12.2902	8.07655	negative	-0.921759	0.84964	0.00040836	0.151399	12.1784	11.929	14.2413	8.06468	10.1765	6.30981	7.75521	10.8857	12.2164	0.05104	0.06557	0.0871	0.58946	0.33879	0.70757	0.75467	0.08671	0.0343
chr10:11866690-11867190_1	10	11866590	11867090	enh_prom	C10orf47	cg22819767;cg17989313	0.722794	0.473728	-0.294807	0.00962156	0.311832	1.14325	2.98161	negative	-0.873254	0.762572	0.002104	0.256404	0.778172	0.678955	1.35979	2.2385	4.81497	3.65658	1.21638	1.3312	1.56813	0.768625	0.798785	0.63495	0.39304	0.371235	0.464895	0.66574	0.72831	0.6833
chr10:82173302-82173802_1	10	82173202	82173702	enh_prom	C10orf58	cg19862899;cg12069540;cg26773567	0.205075	0.649398	0.348437	0.048543	0.411804	54.6018	11.6888	negative	-0.868391	0.754102	0.00238848	0.270109	45.02	65.5083	81.154	8.27776	32.6167	1.54631	4.31427	45.2185	36.1082	0.298883	0.11962	0.22277	0.75887	0.33424	0.744233	0.76025	0.221343	0.162757
chr10:82168857-82169564_1	10	82168757	82169257	enh_prom	C10orf58	cg07091481	0.26213	0.779555	0.41579	0.0245794	0.371036	54.6018	11.6888	negative	-0.861034	0.74138	0.00286768	0.290873	45.02	65.5083	81.154	8.27776	32.6167	1.54631	4.31427	45.2185	36.1082	0.42022	0.18849	0.27244	0.81805	0.5163	0.9188	0.86507	0.26478	0.16472
chr11:61521902-61522578_1	11	61521802	61522302	enh_prom	C11orf9	cg05373256;cg04237003	0.658031	0.281481	-0.294904	0.0378292	0.392933	6.2569	42.3579	negative	-0.857306	0.734974	0.00313411	0.301411	0.844985	3.70037	10.3334	77.4894	11.3554	43.128	37.4587	2.66077	13.745	0.79267	0.66244	0.507765	0.206055	0.462875	0.17024	0.286755	0.806105	0.521175
chr21:47604352-47604852_1	21	47604252	47604752	enh_prom	C21orf56	cg12016809	0.373062	0.109103	-0.22283	0.00852493	0.303299	4.02273	7.71118	negative	-0.952454	0.907169	7.365e-05	0.0785634	4.076	6.66217	2.31358	6.70914	7.77673	8.01414	8.3447	4.44602	2.61587	0.45866	0.24692	0.44965	0.19319	0.07865	0.08432	0.08025	0.28559	0.42449
chr21:47604752-47605252_2	21	47605052	47605552	enh_prom	C21orf56	cg10296238	0.73217	0.27476	-0.409576	0.0130352	0.332991	4.02273	7.71118	negative	-0.85561	0.732068	0.00326082	0.305314	4.076	6.66217	2.31358	6.70914	7.77673	8.01414	8.3447	4.44602	2.61587	0.62509	0.6975	0.81129	0.62561	0.13748	0.18358	0.15237	0.69783	0.82914
chr21:47604752-47605252_1	21	47604652	47605152	enh_prom	C21orf56	cg13012494;cg05896524	0.506742	0.198751	-0.27923	0.00715171	0.290606	4.02273	7.71118	negative	-0.866971	0.751638	0.0024763	0.27611	4.076	6.66217	2.31358	6.70914	7.77673	8.01414	8.3447	4.44602	2.61587	0.456835	0.487415	0.562845	0.397525	0.09798	0.17263	0.12687	0.474615	0.552
chr21:47603952-47604452_1	21	47603852	47604352	enh_prom	C21orf56	cg08742575;cg07747299;cg12016809	0.379919	0.163148	-0.18142	0.0237882	0.369016	4.02273	7.71118	negative	-0.928749	0.862574	0.00029637	0.140238	4.076	6.66217	2.31358	6.70914	7.77673	8.01414	8.3447	4.44602	2.61587	0.44733	0.270513	0.439867	0.29691	0.172847	0.0789367	0.1039	0.311097	0.43079
chr3:69061475-69062156_2	3	69061775	69062275	enh_prom	C3orf64	cg03399783;cg14870461;cg22620797	0.344928	0.2003	-0.119751	0.0184758	0.358236	8.57857	16.0687	negative	-0.899879	0.809782	0.00094696	0.199809	8.57134	8.31473	9.70028	12.6835	10.5811	25.3033	15.7069	7.90648	8.4	0.30599	0.3656	0.35626	0.215827	0.25857	0.12722	0.199583	0.337447	0.359343
chr3:69061256-69061975_2	3	69061556	69062056	enh_prom	C3orf64	cg11369206;cg22620797;cg01881444	0.825283	0.484606	-0.295378	0.00888686	0.307328	8.57857	16.0687	negative	-0.900844	0.81152	0.00091628	0.19937	8.57134	8.31473	9.70028	12.6835	10.5811	25.3033	15.7069	7.90648	8.4	0.74439	0.843017	0.836603	0.578763	0.58923	0.31572	0.45471	0.80751	0.894893
chr3:69058876-69058876_1	3	69058626	69059126	enhancer	C3orf64	cg05287372	0.72798	0.430245	-0.301218	0.002522	0.215498	8.57857	16.0687	negative	-0.893593	0.798508	0.00116448	0.210586	8.57134	8.31473	9.70028	12.6835	10.5811	25.3033	15.7069	7.90648	8.4	0.68726	0.76637	0.73983	0.54079	0.53338	0.29889	0.34792	0.72778	0.71866
chr1:207262490-207262990_1	1	207262390	207262890	enh_prom	C4BPB	cg14740771;cg26407558	0.880139	0.423735	-0.364302	0.045846	0.407325	0.0917777	5.72392	negative	-0.990429	0.980949	2.798e-07	0.0140596	0.0513742	0	0	5.28166	1.18584	7.49007	8.9381	0.356965	0.0505492	0.859345	0.88816	0.86838	0.46477	0.730685	0.253545	0.24594	0.85735	0.92746
chr1:207262090-207262590_1	1	207261990	207262490	enh_prom	C4BPB	cg14740771;cg05659947	0.803516	0.54243	-0.207029	0.0331608	0.385787	0.0917777	5.72392	negative	-0.930035	0.864964	0.00027843	0.13715	0.0513742	0	0	5.28166	1.18584	7.49007	8.9381	0.356965	0.0505492	0.76732	0.757775	0.794635	0.490315	0.68211	0.54339	0.453905	0.85644	0.84141
chr7:120852287-120852287_1	7	120852037	120852537	enhancer	C7orf58	cg17533232	0.193936	0.688987	0.438832	0.0098233	0.313591	23.4183	6.3915	negative	-0.918788	0.844171	0.00046388	0.158553	20.2472	28.552	25.4746	6.7015	12.6587	3.0378	3.16799	26.0844	16.7335	0.27374	0.17969	0.20045	0.79827	0.37712	0.78044	0.80012	0.16081	0.15499
chr7:120702049-120702049_1	7	120701799	120702299	enhancer	C7orf58	cg22645201;cg08554603	0.249786	0.674037	0.359534	0.00748691	0.292746	23.4183	6.3915	negative	-0.904608	0.818315	0.00080325	0.187713	20.2472	28.552	25.4746	6.7015	12.6587	3.0378	3.16799	26.0844	16.7335	0.31153	0.255485	0.248365	0.78041	0.55172	0.644815	0.719205	0.218505	0.215045
chr12:2696048-2696048_1	12	2695798	2696298	enhancer	CACNA1C	cg08166587	0.096328	0.418195	0.294864	0.00884879	0.306786	1.84369	1.12949	negative	-0.853444	0.728367	0.00342757	0.310789	2.09204	1.98557	1.36361	0.898744	1.12955	0.81047	1.67919	1.82317	1.95407	0.10086	0.12071	0.1277	0.48764	0.26935	0.59437	0.32142	0.05697	0.0754
chr7:75419119-75419119_1	7	75418869	75419369	enhancer	CCL26	cg05556717;cg10598030;cg12943082	0.549781	0.316023	-0.193728	0.0251452	0.37184	0.867829	6.78766	negative	-0.883962	0.781389	0.00156171	0.232481	1.5895	0.10052	1.29519	7.06632	4.44365	6.79806	8.84261	1.15002	0.203917	0.558353	0.50552	0.553613	0.38241	0.412447	0.18454	0.284697	0.57487	0.55655
chr11:66085652-66086152_2	11	66085952	66086452	enh_prom	CD248	cg19090861	0.164856	0.408855	0.197272	0.0204118	0.363712	280.48	89.6449	negative	-0.848475	0.71991	0.00383228	0.323701	221.12	342.994	187.279	30.2769	206.606	25.8492	95.8473	338.694	312.311	0.18213	0.17778	0.17783	0.40531	0.32554	0.40612	0.49845	0.16525	0.12129
chr11:66085041-66085669_1	11	66084941	66085441	enh_prom	CD248	cg12782654	0.086652	0.275985	0.156444	0.0393928	0.394775	280.48	89.6449	negative	-0.900031	0.810055	0.00094208	0.199809	221.12	342.994	187.279	30.2769	206.606	25.8492	95.8473	338.694	312.311	0.10212	0.10764	0.0925	0.3107	0.12029	0.35582	0.31713	0.08076	0.05024
chr11:66083441-66084089_1	11	66083341	66083841	enh_prom	CD248	cg11067179;cg06419846;cg22213242	0.081824	0.426095	0.29038	0.0273175	0.375119	280.48	89.6449	negative	-0.911146	0.830186	0.00063065	0.176378	221.12	342.994	187.279	30.2769	206.606	25.8492	95.8473	338.694	312.311	0.08388	0.0900767	0.0894467	0.56493	0.20714	0.56147	0.37084	0.0868567	0.05886
chr11:66083541-66085299_2	11	66083841	66084341	enhancer	CD248	cg14027234	0.06443	0.246078	0.153426	0.0424132	0.400755	280.48	89.6449	negative	-0.853897	0.729141	0.00339221	0.30998	221.12	342.994	187.279	30.2769	206.606	25.8492	95.8473	338.694	312.311	0.05257	0.09222	0.06833	0.35694	0.08756	0.25095	0.28886	0.05861	0.05042
chr11:66082889-66083766_2	11	66083189	66083689	promoter	CD248	cg11067179;cg20367218;cg22213242	0.09	0.488339	0.335611	0.0211054	0.364384	280.48	89.6449	negative	-0.909167	0.826585	0.00067983	0.180799	221.12	342.994	187.279	30.2769	206.606	25.8492	95.8473	338.694	312.311	0.0912933	0.10124	0.0947133	0.584623	0.267597	0.656107	0.44503	0.09626	0.0664933
chr11:66082889-66083766_1	11	66082789	66083289	promoter	CD248	cg05478809;cg20367218	0.079349	0.605492	0.43508	0.0232422	0.367506	280.48	89.6449	negative	-0.909918	0.827952	0.00066085	0.178792	221.12	342.994	187.279	30.2769	206.606	25.8492	95.8473	338.694	312.311	0.093725	0.090055	0.07999	0.70112	0.29853	0.76288	0.65944	0.07618	0.056795
chr11:66082046-66082046_1	11	66081796	66082296	promoter	CD248	cg17351376	0.099796	0.497765	0.337528	0.0222738	0.364918	280.48	89.6449	negative	-0.910878	0.829699	0.00063715	0.176378	221.12	342.994	187.279	30.2769	206.606	25.8492	95.8473	338.694	312.311	0.09268	0.11244	0.11759	0.66074	0.23537	0.5692	0.52575	0.08666	0.08961
chr3:45187958-45188512_1	3	45187858	45188358	enh_prom	CDCP1	cg15779716;cg15107641;cg13722619	0.706766	0.471724	-0.193385	0.0165306	0.35003	2.34441	26.0211	negative	-0.862677	0.744212	0.00275541	0.28632	3.2428	2.53825	4.78489	46.5064	13.4092	12.4117	31.757	0.187351	0.968755	0.71234	0.720897	0.679547	0.437887	0.572423	0.459663	0.416923	0.72498	0.696067
chr7:136686832-136686832_1	7	136686582	136687082	enhancer	CHRM2	cg14944166	0.652774	0.81641	0.15432	0.0043751	0.254495	56.7078	5.18803	negative	-0.942985	0.889221	0.00013778	0.103218	44.6023	49.29	63.2695	2.87062	15.5883	0.315642	1.97754	54.9918	71.3855	0.72566	0.67047	0.5909	0.83877	0.71942	0.86038	0.84707	0.69512	0.58172
chr12:104849615-104849615_1	12	104849365	104849865	enhancer	CHST11	cg02908942	0.817674	0.45747	-0.300742	0.0408469	0.398091	0.438885	2.34766	negative	-0.948024	0.89875	0.00010016	0.0902986	0.369205	0.199123	0.340484	3.66381	0.65036	2.78225	2.29423	0.874573	0.411042	0.83319	0.79258	0.80214	0.31256	0.77278	0.42298	0.32156	0.75432	0.90614
chr3:170137659-170138288_2	3	170137959	170138459	enh_prom	CLDN11	cg20794824	0.895972	0.226318	-0.545406	0.0252647	0.372329	39.9383	225.155	negative	-0.868316	0.753972	0.00239308	0.270297	37.4018	65.3038	28.9319	344.838	90.969	348.162	116.65	39.2673	28.7866	0.88098	0.89279	0.90161	0.11573	0.5943	0.06327	0.13197	0.87673	0.92775
chr3:48603978-48603978_1	3	48603728	48604228	enhancer	COL7A1	cg17183531	0.484702	0.70392	0.201504	0.0115488	0.323669	35.5298	5.93058	negative	-0.836517	0.699761	0.00493818	0.353354	19.5056	28.7365	42.7246	6.64002	10.0381	1.01607	6.02815	50.9354	35.7469	0.47934	0.54946	0.48985	0.62549	0.57715	0.80682	0.80622	0.40245	0.50241
chr3:48632484-48633441_3	3	48633184	48633684	enhancer	COL7A1	cg08977790	0.066656	0.3868	0.260634	0.0222011	0.364808	35.5298	5.93058	negative	-0.847869	0.718881	0.0038838	0.3255	19.5056	28.7365	42.7246	6.64002	10.0381	1.01607	6.02815	50.9354	35.7469	0.06484	0.08601	0.07604	0.40151	0.23551	0.43341	0.47677	0.05892	0.04747
chr3:48632784-48633284_2	3	48633084	48633584	enh_prom	COL7A1	cg08977790;cg18656024	0.066423	0.231632	0.13424	0.0197947	0.361624	35.5298	5.93058	negative	-0.860624	0.740673	0.00289623	0.291768	19.5056	28.7365	42.7246	6.64002	10.0381	1.01607	6.02815	50.9354	35.7469	0.070615	0.07789	0.07567	0.237095	0.16243	0.25424	0.272765	0.060625	0.047315
chr12:109040983-109040983_1	12	109040733	109041233	enhancer	CORO1C	cg23429240	0.068846	0.281218	0.170828	0.0360383	0.390454	243.234	149.029	negative	-0.95117	0.904725	8.075e-05	0.0789955	233.548	251.334	274.063	155.486	176.826	137.405	126.399	221.543	235.68	0.09416	0.05791	0.04792	0.30194	0.14138	0.33283	0.34872	0.08785	0.05639
chr7:137609343-137609343_1	7	137609093	137609593	enhancer	CREB3L2	cg23697157	0.240466	0.685048	0.38757	0.00149686	0.181224	28.3189	18.9575	negative	-0.877019	0.769162	0.00190051	0.250737	26.8283	27.141	30.3459	23.8376	19.2709	13.8799	18.8417	29.4236	27.8559	0.31576	0.222	0.22202	0.70513	0.64667	0.70647	0.68192	0.24778	0.19477
chr2:36603293-36603793_1	2	36603193	36603693	enh_prom	CRIM1	cg01154283	0.14906	0.378742	0.194736	0.00826076	0.30098	398.289	242.324	negative	-0.927461	0.860184	0.00031514	0.142221	397.254	362.098	364.408	188.062	377.864	188.164	215.207	429.111	438.576	0.19781	0.15413	0.14498	0.42626	0.27884	0.39062	0.41925	0.15909	0.08929
chr2:36635519-36635519_1	2	36635269	36635769	enhancer	CRIM1	cg23336143	0.066992	0.31214	0.19711	0.039232	0.394775	398.289	242.324	negative	-0.890694	0.793336	0.00127558	0.2196	397.254	362.098	364.408	188.062	377.864	188.164	215.207	429.111	438.576	0.08176	0.04933	0.04393	0.35997	0.15086	0.30615	0.43158	0.13259	0.02735
chr16:84860592-84861168_2	16	84860892	84861392	enh_prom	CRISPLD2	cg26709988	0.049522	0.613498	0.45875	0.0362795	0.391024	27.2095	10.9237	negative	-0.869797	0.756547	0.00230363	0.265361	21.7246	21.4813	24.0581	12.5222	16.3797	5.84377	8.949	34.356	34.4277	0.06523	0.06602	0.04497	0.70114	0.22333	0.84304	0.68648	0.04708	0.02431
chr16:84876415-84876915_1	16	84876315	84876815	enh_prom	CRISPLD2	cg04704487	0.438276	0.73687	0.248452	0.0102743	0.316388	27.2095	10.9237	negative	-0.845124	0.714235	0.00412292	0.33274	21.7246	21.4813	24.0581	12.5222	16.3797	5.84377	8.949	34.356	34.4277	0.47383	0.43852	0.43717	0.82244	0.7022	0.75061	0.67223	0.39922	0.44264
chr16:84884980-84885480_1	16	84884880	84885380	enh_prom	CRISPLD2	cg00263677	0.034152	0.714888	0.554368	0.0297622	0.379625	27.2095	10.9237	negative	-0.879958	0.774327	0.00175144	0.243304	21.7246	21.4813	24.0581	12.5222	16.3797	5.84377	8.949	34.356	34.4277	0.0501	0.03034	0.03538	0.5965	0.36725	0.9622	0.9336	0.04529	0.00965
chr15:76005071-76005785_3	15	76005771	76006271	enh_prom	CSPG4	cg02400942;cg03238581;cg21460582	0.423911	0.603761	0.151644	0.0236103	0.368555	29.8385	6.69166	negative	-0.849644	0.721895	0.00373426	0.32045	23.1127	47.7118	22.5719	3.1733	20.3617	0.471867	2.75977	25.4319	30.3641	0.44176	0.432557	0.424957	0.666223	0.48487	0.661623	0.602327	0.3991	0.421183
chr15:76005685-76006371_2	15	76005985	76006485	enh_prom	CSPG4	cg03238581;cg02400942	0.337853	0.543878	0.177656	0.0156714	0.347316	29.8385	6.69166	negative	-0.852496	0.726749	0.00350245	0.313192	23.1127	47.7118	22.5719	3.1733	20.3617	0.471867	2.75977	25.4319	30.3641	0.361985	0.35057	0.34517	0.609295	0.419415	0.614555	0.532245	0.324995	0.306545
chr10:126751950-126752037_1	10	126751744	126752244	enhancer	CTBP2	cg13292607;cg21373263;cg20403409	0.146611	0.682496	0.437061	0.0376537	0.392548	26.9358	18.6918	negative	-0.912848	0.833292	0.00059036	0.173586	26.6393	25.0817	28.5924	21.6731	22.2495	16.1001	14.7446	25.8366	28.529	0.184147	0.17168	0.136653	0.766187	0.28593	0.881787	0.79608	0.155043	0.08553
chr3:37906336-37906836_1	3	37906236	37906736	enh_prom	CTDSPL	cg12386061	0.385398	0.699802	0.275962	0.0211799	0.364384	15.3692	9.08387	negative	-0.937785	0.87944	0.00018604	0.117333	15.1256	16.0671	16.3326	6.35312	15.3744	9.55105	5.05691	13.4724	15.8482	0.32956	0.35696	0.45258	0.81811	0.43383	0.76498	0.78229	0.49276	0.29513
chr7:101754758-101755186_1	7	101754658	101755158	enhancer	CUX1	cg15770446;cg17008375;cg16829042	0.800515	0.55525	-0.196549	0.0406689	0.397706	22.4543	50.3827	negative	-0.845156	0.714288	0.00412016	0.33264	23.2289	28.2946	20.0007	31.1329	39.7708	82.622	48.005	19.3221	21.4252	0.743097	0.799857	0.80587	0.52234	0.70074	0.41476	0.58316	0.793863	0.859887
chr5:139040296-139040946_1	5	139040196	139040696	enh_prom	CXXC5	cg18814344	0.084742	0.402097	0.263594	0.0109169	0.319323	28.8899	10.5866	negative	-0.967424	0.935909	1.99e-05	0.0529533	25.8942	26.4554	29.8759	10.5183	17.0075	6.48021	8.34047	28.482	33.7418	0.07962	0.09058	0.09745	0.40649	0.33766	0.48752	0.37672	0.08982	0.06624
chr5:139047639-139048139_1	5	139047539	139048039	enh_prom	CXXC5	cg24119607;cg07558472	0.059656	0.218342	0.129048	0.0231977	0.367461	28.8899	10.5866	negative	-0.963652	0.928625	2.909e-05	0.0569484	25.8942	26.4554	29.8759	10.5183	17.0075	6.48021	8.34047	28.482	33.7418	0.058855	0.06876	0.06278	0.26077	0.13919	0.226185	0.247225	0.067275	0.04061
chr5:139040296-139040946_2	5	139040596	139041096	enh_prom	CXXC5	cg15165154;cg14871225;cg20455854;cg19628988	0.0426775	0.403713	0.297755	0.0164873	0.350012	28.8899	10.5866	negative	-0.952	0.906304	7.611e-05	0.0789955	25.8942	26.4554	29.8759	10.5183	17.0075	6.48021	8.34047	28.482	33.7418	0.0370725	0.04369	0.0495575	0.41669	0.312053	0.544905	0.341205	0.04756	0.0355075
chr5:139040546-139041014_2	5	139040846	139041346	enhancer	CXXC5	cg20455854;cg19628988;cg15165154	0.041238	0.408558	0.30076	0.0218614	0.364808	28.8899	10.5866	negative	-0.944565	0.892204	0.00012506	0.100538	25.8942	26.4554	29.8759	10.5183	17.0075	6.48021	8.34047	28.482	33.7418	0.0323633	0.0400533	0.04841	0.43589	0.287607	0.57361	0.337127	0.0462233	0.03914
chr5:139038776-139039276_1	5	139038676	139039176	enh_prom	CXXC5	cg01008405	0.099698	0.44149	0.284752	0.0176773	0.354385	28.8899	10.5866	negative	-0.975946	0.95247	6.942e-06	0.0342933	25.8942	26.4554	29.8759	10.5183	17.0075	6.48021	8.34047	28.482	33.7418	0.10541	0.10941	0.11206	0.40908	0.28439	0.52503	0.54746	0.10677	0.06484
chr15:74661541-74661541_1	15	74661291	74661791	enhancer	CYP11A1	cg24849517	0.777664	0.22199	-0.531866	0.00107265	0.162746	0.260979	6.8015	negative	-0.86276	0.744354	0.00274983	0.28632	0.48117	0.329324	0.231201	1.75207	4.32436	13.7236	7.40598	0.156475	0.106725	0.81837	0.69524	0.75149	0.31008	0.43142	0.07189	0.07457	0.79137	0.83185
chr15:74659833-74660333_1	15	74659733	74660233	enh_prom	CYP11A1	cg18068537;cg08033551;cg05939495;cg06285340	0.762407	0.509595	-0.204077	0.0360188	0.390454	0.260979	6.8015	negative	-0.863634	0.745863	0.00269143	0.283719	0.48117	0.329324	0.231201	1.75207	4.32436	13.7236	7.40598	0.156475	0.106725	0.77112	0.749813	0.753127	0.511205	0.667362	0.39374	0.466073	0.741705	0.796268
chr9:90113827-90114501_2	9	90114127	90114627	enh_prom	DAPK1	cg24754277	0.813276	0.266342	-0.44075	0.0377757	0.392775	0.179965	17.4506	negative	-0.974257	0.949177	8.789e-06	0.0375578	0.222689	0.099557	0.151526	15.2341	6.09559	26.229	22.2439	0.0677141	0.35834	0.79779	0.80953	0.82317	0.17024	0.64379	0.10536	0.14598	0.78595	0.84994
chr9:90114505-90115005_1	9	90114405	90114905	enh_prom	DAPK1	cg13752933	0.735906	0.168378	-0.487818	0.00347379	0.238441	0.179965	17.4506	negative	-0.897806	0.806056	0.00101524	0.20505	0.222689	0.099557	0.151526	15.2341	6.09559	26.229	22.2439	0.0677141	0.35834	0.69204	0.73235	0.73203	0.19576	0.21297	0.11612	0.14866	0.74707	0.77604
chr9:90113601-90114327_1	9	90113501	90114001	enh_prom	DAPK1	cg15746719;cg19734228;cg14014720	0.499364	0.164809	-0.277951	0.0294246	0.379242	0.179965	17.4506	negative	-0.966721	0.934549	2.143e-05	0.0529533	0.222689	0.099557	0.151526	15.2341	6.09559	26.229	22.2439	0.0677141	0.35834	0.538607	0.52941	0.493053	0.100617	0.40927	0.06306	0.08629	0.44816	0.48759
chr9:90113601-90114327_2	9	90113901	90114401	enh_prom	DAPK1	cg13527872	0.90817	0.380352	-0.413348	0.0459162	0.407373	0.179965	17.4506	negative	-0.952657	0.907556	7.257e-05	0.0784129	0.222689	0.099557	0.151526	15.2341	6.09559	26.229	22.2439	0.0677141	0.35834	0.89028	0.90423	0.92348	0.2659	0.72305	0.30401	0.22845	0.85676	0.9661
chr8:142162582-142162931_1	8	142162506	142163006	enhancer	DENND3	cg03400695;cg05423291	0.53485	0.844204	0.246751	0.0239484	0.369082	8.13688	4.58146	negative	-0.853145	0.727856	0.00345109	0.31149	6.6598	5.61942	8.38119	4.16608	6.8695	3.28578	4.00448	11.1862	8.8378	0.51218	0.58264	0.55335	0.908535	0.714025	0.894795	0.85946	0.479305	0.546775
chr10:536856-537356_1	10	536756	537256	enh_prom	DIP2C	cg05734675;cg27598761	0.121826	0.330962	0.1661	0.0447432	0.405312	11.3673	7.85119	negative	-0.907381	0.823341	0.00072646	0.183864	11.1966	10.836	9.96968	6.32613	8.76775	8.04115	8.26972	12.3319	12.5025	0.125745	0.132345	0.13045	0.41893	0.18821	0.35548	0.36123	0.120955	0.099635
chr10:664719-665510_1	10	664619	665119	enhancer	DIP2C	cg26782150;cg08784934;cg02463970;cg18474072	0.468212	0.712947	0.252603	1.799e-05	0.039158	11.3673	7.85119	negative	-0.900716	0.811289	0.00092032	0.19937	11.1966	10.836	9.96968	6.32613	8.76775	8.04115	8.26972	12.3319	12.5025	0.457305	0.506365	0.482077	0.728433	0.723185	0.70275	0.697422	0.401537	0.493775
chr10:670862-671362_2	10	671162	671662	enh_prom	DIP2C	cg02700106	0.050072	0.438673	0.32138	0.0219874	0.364808	11.3673	7.85119	negative	-0.931544	0.867775	0.00025835	0.135933	11.1966	10.836	9.96968	6.32613	8.76775	8.04115	8.26972	12.3319	12.5025	0.05394	0.06168	0.0569	0.61183	0.24903	0.45953	0.4343	0.04986	0.02798
chr10:729504-730004_2	10	729804	730304	enh_prom	DIP2C	cg05450336;cg18503829	0.049703	0.41745	0.305036	0.0193314	0.35996	11.3673	7.85119	negative	-0.934472	0.873237	0.00022235	0.129404	11.1966	10.836	9.96968	6.32613	8.76775	8.04115	8.26972	12.3319	12.5025	0.05758	0.04872	0.06109	0.585205	0.271805	0.3735	0.43929	0.048855	0.03227
chr10:536856-537356_2	10	537156	537656	enh_prom	DIP2C	cg03147470	0.108104	0.318713	0.17105	0.0438713	0.403845	11.3673	7.85119	negative	-0.893341	0.798059	0.00117383	0.211897	11.1966	10.836	9.96968	6.32613	8.76775	8.04115	8.26972	12.3319	12.5025	0.09331	0.15102	0.13394	0.40813	0.16213	0.30084	0.40375	0.08556	0.07669
chr8:12973902-12973902_1	8	12973652	12974152	enhancer	DLC1	cg02126477	0.051156	0.364328	0.251398	0.0391466	0.394634	49.8486	29.0949	negative	-0.860663	0.74074	0.00289351	0.291768	52.7819	44.8024	43.6598	36.5022	27.6708	25.5524	26.654	52.6505	55.3483	0.05283	0.06651	0.05947	0.30957	0.19994	0.4081	0.5397	0.04035	0.03662
chr6:56400181-56400181_1	6	56399931	56400431	enhancer	DST	cg05537607	0.622672	0.8235	0.200928	0.0220583	0.364808	38.7965	28.1797	negative	-0.864263	0.74695	0.00264993	0.281684	43.9605	37.0431	34.0019	28.2018	32.6062	22.8786	29.0321	40.2296	38.7474	0.53218	0.7037	0.68765	0.8389	0.67657	0.9106	0.86793	0.44761	0.74222
chr6:56581152-56581152_1	6	56580902	56581402	enhancer	DST	cg05457998	0.145052	0.696765	0.448446	0.0235208	0.368189	38.7965	28.1797	negative	-0.890603	0.793173	0.00127921	0.2196	43.9605	37.0431	34.0019	28.2018	32.6062	22.8786	29.0321	40.2296	38.7474	0.15228	0.10454	0.19168	0.73747	0.41296	0.83396	0.80267	0.18856	0.0882
chr11:65359271-65359771_1	11	65359171	65359671	enh_prom	EHBP1L1	cg09709600	0.579988	0.752123	0.173588	0.0185967	0.358389	19.8829	14.1072	negative	-0.854644	0.730416	0.00333448	0.307126	17.4537	18.1997	18.5733	15.0267	19.3116	13.4084	8.6819	24.6088	20.5788	0.69581	0.66363	0.51345	0.75736	0.61319	0.85742	0.78052	0.46726	0.55979
chr14:100346529-100346529_1	14	100346279	100346779	enhancer	EML1	cg27059354	0.301722	0.538695	0.201546	0.0345016	0.38807	22.0394	7.14585	negative	-0.844157	0.712601	0.0042096	0.333547	18.253	20.2568	22.1304	2.62508	17.1111	4.06812	4.77909	31.404	18.1527	0.38373	0.39046	0.27099	0.64032	0.37791	0.46166	0.67489	0.24902	0.21441
chr14:100275737-100275737_1	14	100275487	100275987	enhancer	EML1	cg21919819	0.328178	0.510373	0.152466	0.0214162	0.364433	22.0394	7.14585	negative	-0.886276	0.785486	0.00145879	0.226468	18.253	20.2568	22.1304	2.62508	17.1111	4.06812	4.77909	31.404	18.1527	0.32261	0.40056	0.339	0.53252	0.38843	0.57555	0.54499	0.30129	0.27743
chr14:100258673-100259173_1	14	100258573	100259073	enh_prom	EML1	cg02727423;cg24969902;cg01260820	0.593455	0.753013	0.142351	0.023515	0.368189	22.0394	7.14585	negative	-0.917876	0.842496	0.00048193	0.161497	18.253	20.2568	22.1304	2.62508	17.1111	4.06812	4.77909	31.404	18.1527	0.547917	0.665687	0.61688	0.77086	0.61285	0.825887	0.802457	0.51413	0.62266
chr10:119303225-119306659_9	10	119306325	119306825	promoter	EMX2	cg20038591	0.079432	0.589925	0.421376	0.0310859	0.382178	6.56141	2.55521	negative	-0.835974	0.698852	0.00499304	0.353669	5.50669	3.47554	8.29265	2.55472	6.22898	0.503965	0.933164	8.82297	6.70921	0.07806	0.09273	0.09542	0.44311	0.32736	0.82766	0.76157	0.08065	0.0503
chr10:119307692-119307931_1	10	119307562	119308062	promoter	EMX2	cg19925204;cg17320707;cg13630043	0.051838	0.643982	0.487979	0.0228791	0.367045	6.56141	2.55521	negative	-0.838469	0.703029	0.00474447	0.347409	5.50669	3.47554	8.29265	2.55472	6.22898	0.503965	0.933164	8.82297	6.70921	0.0680867	0.0588567	0.0580467	0.537953	0.376803	0.842937	0.818233	0.03994	0.03426
chr10:119303225-119306659_7	10	119305525	119306025	promoter	EMX2	cg17249170;cg10846980	0.086418	0.42833	0.286599	0.031801	0.383081	6.56141	2.55521	negative	-0.862677	0.744211	0.00275543	0.28632	5.50669	3.47554	8.29265	2.55472	6.22898	0.503965	0.933164	8.82297	6.70921	0.10722	0.11236	0.079755	0.311425	0.23851	0.59903	0.564355	0.068175	0.06458
chr12:11912232-11912232_1	12	11911982	11912482	enhancer	ETV6	cg06225767	0.845802	0.519605	-0.270672	0.0477582	0.410515	4.11789	6.17833	negative	-0.840372	0.706225	0.0045606	0.342721	3.8059	4.20388	3.69612	6.52874	3.51165	7.9665	6.70645	3.96	4.92356	0.86161	0.73692	0.84174	0.58481	0.77234	0.43151	0.28976	0.87688	0.91186
chr1:36786959-36787459_2	1	36787259	36787759	enh_prom	FAM176B	cg17139085;cg23672278	0.059922	0.306805	0.203866	0.0346181	0.388339	60.9291	27.141	negative	-0.861072	0.741445	0.00286509	0.290717	42.4069	57.6116	61.5414	17.8788	50.6963	17.1494	22.8393	73.3183	69.7675	0.08037	0.06574	0.06016	0.33372	0.16427	0.26445	0.46478	0.05914	0.0342
chr1:36789690-36790190_2	1	36789990	36790490	enh_prom	FAM176B	cg22810403	0.423942	0.746398	0.261512	0.0145544	0.342123	60.9291	27.141	negative	-0.903273	0.815901	0.00084216	0.193654	42.4069	57.6116	61.5414	17.8788	50.6963	17.1494	22.8393	73.3183	69.7675	0.52236	0.54533	0.36485	0.6884	0.67734	0.81015	0.8097	0.32888	0.35829
chr1:36787759-36788259_1	1	36787659	36788159	enh_prom	FAM176B	cg22721579	0.024	0.260295	0.192994	0.0432763	0.402514	60.9291	27.141	negative	-0.89625	0.803264	0.00106869	0.207523	42.4069	57.6116	61.5414	17.8788	50.6963	17.1494	22.8393	73.3183	69.7675	0.04161	0.02933	0.01668	0.42265	0.10909	0.27694	0.2325	0.0204	0.01198
chr6:116832526-116833026_1	6	116832426	116832926	enh_prom_ins	FAM26E	cg21741010;cg14547726	0.250103	0.110785	-0.136737	0.00087311	0.152787	4.31185	10.8185	negative	-0.930225	0.865318	0.00027584	0.136321	5.40131	5.8039	3.19656	8.9895	6.49069	13.715	14.0789	2.34756	4.80993	0.22777	0.263285	0.260685	0.14874	0.15197	0.07002	0.07241	0.30771	0.191065
chr13:98859885-98859885_1	13	98859635	98860135	enhancer	FARP1	cg10672164	0.060446	0.53082	0.376998	0.0398831	0.395732	135.63	44.1412	negative	-0.874552	0.764841	0.0020322	0.254961	129.507	131.674	95.1801	28.7621	77.9019	31.3294	38.5712	173.744	148.046	0.06268	0.0486	0.06949	0.55529	0.26369	0.79938	0.50492	0.11161	0.00985
chr13:98810343-98810343_1	13	98810093	98810593	enhancer	FARP1	cg09499379	0.579736	0.83735	0.230386	0.00510439	0.266317	135.63	44.1412	negative	-0.874424	0.764617	0.00203921	0.254975	129.507	131.674	95.1801	28.7621	77.9019	31.3294	38.5712	173.744	148.046	0.64075	0.7088	0.54276	0.82648	0.71446	0.90434	0.90412	0.50957	0.4968
chr13:98952518-98952518_1	13	98952268	98952768	enhancer	FARP1	cg09635874	0.283368	0.848805	0.513332	8.994e-05	0.0650213	135.63	44.1412	negative	-0.872833	0.761838	0.00212761	0.257796	129.507	131.674	95.1801	28.7621	77.9019	31.3294	38.5712	173.744	148.046	0.28374	0.40927	0.22259	0.87414	0.84092	0.85392	0.82624	0.27562	0.22562
chr12:95598159-95598159_1	12	95597909	95598409	enhancer	FGD6	cg16526732	0.798604	0.35732	-0.387818	0.00342265	0.237556	2.06498	4.57742	negative	-0.855299	0.731536	0.00328442	0.305769	2.36101	1.98862	1.70331	5.91068	3.09225	5.13725	4.16952	2.15192	2.12004	0.79388	0.81009	0.78004	0.27862	0.38955	0.47657	0.28454	0.77278	0.83623
chr12:95537812-95537812_1	12	95537562	95538062	enhancer	FGD6	cg07737802	0.518654	0.236943	-0.249958	0.0431711	0.402251	2.06498	4.57742	negative	-0.851223	0.72458	0.00360469	0.315879	2.36101	1.98862	1.70331	5.91068	3.09225	5.13725	4.16952	2.15192	2.12004	0.54023	0.46374	0.55839	0.21244	0.5371	0.11965	0.07858	0.4933	0.53761
chr6:35656775-35657364_2	6	35657075	35657575	enh_prom	FKBP5	cg00130530;cg20813374	0.76057	0.65051	-0.110846	0.0490377	0.41242	1.65763	12.2131	negative	-0.877479	0.769969	0.00187663	0.248565	0.891136	0.902151	4.14872	17.249	3.59459	16.8679	11.1408	1.15245	1.19368	0.765645	0.781855	0.718725	0.535145	0.7795	0.677745	0.60965	0.772315	0.76431
chr6:35654363-35654363_1	6	35654113	35654613	promoter	FKBP5	cg03546163	0.886412	0.49038	-0.329238	0.0363429	0.391024	1.65763	12.2131	negative	-0.936811	0.877614	0.00019625	0.122623	0.891136	0.902151	4.14872	17.249	3.59459	16.8679	11.1408	1.15245	1.19368	0.8575	0.87047	0.89167	0.44061	0.80799	0.3505	0.36242	0.87985	0.93257
chr15:33307322-33307322_1	15	33307072	33307572	enhancer	FMN1	cg13619277	0.099538	0.410905	0.283894	0.00966976	0.312	1.7363	0.616057	negative	-0.847375	0.718045	0.00392607	0.327024	1.65393	1.34322	2.4954	0.47079	1.06135	0.381388	0.550699	1.5838	1.60516	0.12007	0.13305	0.11777	0.53163	0.19641	0.43481	0.48077	0.05344	0.07336
chr15:33360088-33360588_2	15	33360388	33360888	enh_prom	FMN1	cg05115375	0.050498	0.352442	0.243224	0.0248761	0.371351	1.7363	0.616057	negative	-0.885791	0.784625	0.00147999	0.227517	1.65393	1.34322	2.4954	0.47079	1.06135	0.381388	0.550699	1.5838	1.60516	0.05006	0.07587	0.06083	0.40636	0.20714	0.41774	0.37853	0.03704	0.02869
chr14:52007174-52007174_1	14	52006924	52007424	enhancer	FRMD6	cg02275040	0.160608	0.701028	0.42695	0.0344892	0.38807	117.388	42.1266	negative	-0.856804	0.734113	0.00317127	0.301411	154.89	117.957	104.095	44.5916	50.7359	27.0032	46.1755	106.627	103.373	0.16334	0.25456	0.22315	0.7887	0.39656	0.83881	0.78004	0.05402	0.10797
chr5:153667063-153667063_1	5	153666813	153667313	enhancer	GALNT10	cg11208869	0.884724	0.535048	-0.279474	0.0464805	0.408528	24.7528	49.0045	negative	-0.87843	0.771639	0.00182789	0.246771	25.287	13.2197	34.6089	50.7724	29.4876	53.9552	61.8029	18.1042	32.5443	0.83272	0.90307	0.89158	0.39555	0.79773	0.48901	0.4579	0.87406	0.92219
chr3:128209522-128210156_2	3	128209822	128210322	enh_prom	GATA2	cg07841173;cg22801992	0.044167	0.290959	0.201046	0.0197081	0.361622	37.0261	9.0029	negative	-0.910732	0.829432	0.00064072	0.176398	36.0387	20.4939	42.0455	5.07568	27.333	0.77885	2.82407	46.0486	40.504	0.05161	0.04952	0.048115	0.291245	0.19015	0.326715	0.355725	0.043545	0.028045
chr3:128208556-128212476_5	3	128210056	128210556	promoter	GATA2	cg03839949;cg07841173	0.04282	0.323036	0.227447	0.0257505	0.372733	37.0261	9.0029	negative	-0.917083	0.84104	0.00049803	0.162595	36.0387	20.4939	42.0455	5.07568	27.333	0.77885	2.82407	46.0486	40.504	0.04258	0.047155	0.050685	0.339	0.17575	0.37582	0.401575	0.04568	0.028
chr3:128208556-128212476_7	3	128210856	128211356	promoter	GATA2	cg19759549;cg25772723;cg22978620	0.04227	0.176291	0.111558	0.0173424	0.353438	37.0261	9.0029	negative	-0.88966	0.791494	0.00131697	0.2196	36.0387	20.4939	42.0455	5.07568	27.333	0.77885	2.82407	46.0486	40.504	0.0497233	0.0453433	0.04875	0.22897	0.114793	0.17648	0.18492	0.04227	0.0252633
chr3:128204747-128205247_2	3	128205047	128205547	enh_prom	GATA2	cg07263393;cg08755743	0.046692	0.369635	0.267063	0.0275634	0.375279	37.0261	9.0029	negative	-0.913921	0.835251	0.00056593	0.171983	36.0387	20.4939	42.0455	5.07568	27.333	0.77885	2.82407	46.0486	40.504	0.056785	0.044125	0.051135	0.44297	0.15617	0.41426	0.46514	0.047695	0.03372
chr3:128209522-128210156_1	3	128209422	128209922	enh_prom	GATA2	cg00241663	0.058248	0.365995	0.24797	0.0297358	0.379496	37.0261	9.0029	negative	-0.906051	0.820929	0.00076261	0.187646	36.0387	20.4939	42.0455	5.07568	27.333	0.77885	2.82407	46.0486	40.504	0.07741	0.07285	0.07202	0.32233	0.22872	0.51018	0.40275	0.04782	0.02114
chr3:128203164-128203664_1	3	128203064	128203564	enh_prom	GATA2	cg07195926	0.040154	0.322138	0.231722	0.0338633	0.387101	37.0261	9.0029	negative	-0.873908	0.763715	0.00206762	0.256404	36.0387	20.4939	42.0455	5.07568	27.333	0.77885	2.82407	46.0486	40.504	0.0331	0.03954	0.04726	0.45374	0.15227	0.41064	0.2719	0.04789	0.03298
chr3:128203947-128204447_1	3	128203847	128204347	enh_prom	GATA2	cg22915582	0.04963	0.277068	0.18846	0.0217688	0.364808	37.0261	9.0029	negative	-0.881238	0.77658	0.00168915	0.239519	36.0387	20.4939	42.0455	5.07568	27.333	0.77885	2.82407	46.0486	40.504	0.06259	0.0468	0.05439	0.3628	0.16161	0.25737	0.32649	0.05263	0.03174
chr3:128204347-128204847_2	3	128204647	128205147	enh_prom	GATA2	cg06796779;cg01102073;cg06115614	0.06507	0.562366	0.409478	0.0215493	0.364433	37.0261	9.0029	negative	-0.916716	0.840369	0.00050559	0.162899	36.0387	20.4939	42.0455	5.07568	27.333	0.77885	2.82407	46.0486	40.504	0.0695	0.0773167	0.0761833	0.63875	0.297327	0.613843	0.699543	0.0712267	0.0311233
chr8:11597172-11597251_1	8	11596962	11597462	promoter	GATA4	cg13293535;cg04880278	0.758733	0.432343	-0.281929	0.00209893	0.204268	0.099761	15.5561	negative	-0.913771	0.834978	0.00056929	0.172657	0.024127	0.15395	0.188062	15.2928	5.3911	21.1305	20.4099	0	0.132666	0.73846	0.65943	0.78713	0.45308	0.50113	0.391045	0.384115	0.753575	0.85507
chr8:11578850-11579013_1	8	11578682	11579182	promoter	GATA4	cg16816874;cg03579045	0.742	0.36894	-0.313964	0.0287429	0.378104	0.099761	15.5561	negative	-0.967585	0.93622	1.956e-05	0.0529533	0.024127	0.15395	0.188062	15.2928	5.3911	21.1305	20.4099	0	0.132666	0.701815	0.79766	0.73533	0.43707	0.6135	0.255755	0.169435	0.661055	0.81414
chr8:11577508-11578008_1	8	11577408	11577908	enh_prom	GATA4	cg00412675	0.857864	0.437325	-0.348496	0.0389662	0.394361	0.099761	15.5561	negative	-0.978985	0.958411	4.34e-06	0.0342577	0.024127	0.15395	0.188062	15.2928	5.3911	21.1305	20.4099	0	0.132666	0.80521	0.87915	0.87671	0.54392	0.71952	0.24527	0.24059	0.81913	0.90912
chr18:19752103-19752603_1	18	19752003	19752503	enh_prom	GATA6	cg24753061;cg14439622;cg09507790	0.872878	0.321497	-0.450346	0.0255407	0.372389	0.261185	33.2127	negative	-0.954888	0.911811	6.143e-05	0.0722649	0.270226	0.33451	0.160282	33.6151	7.68576	57.0824	34.4674	0.188478	0.352428	0.857495	0.87774	0.853485	0.219885	0.636245	0.18118	0.24868	0.866275	0.909395
chr18:19756482-19756982_2	18	19756782	19757282	enh_prom	GATA6	cg12615165	0.96921	0.30858	-0.564944	0.00966066	0.311976	0.261185	33.2127	negative	-0.956113	0.914153	5.585e-05	0.0722649	0.270226	0.33451	0.160282	33.6151	7.68576	57.0824	34.4674	0.188478	0.352428	0.96184	0.96576	0.96203	0.26445	0.5604	0.09137	0.3181	0.97409	0.98233
chr18:19753070-19753570_2	18	19753370	19753870	enh_prom	GATA6	cg16204205	0.900788	0.394327	-0.4088	0.0450654	0.405946	0.261185	33.2127	negative	-0.917352	0.841535	0.00049252	0.162595	0.270226	0.33451	0.160282	33.6151	7.68576	57.0824	34.4674	0.188478	0.352428	0.89667	0.8386	0.9133	0.15649	0.77915	0.30471	0.33696	0.91643	0.93894
chr18:19752103-19752603_2	18	19752403	19752903	enh_prom	GATA6	cg19177125	0.907378	0.297332	-0.497738	0.0212811	0.364428	0.261185	33.2127	negative	-0.92143	0.849034	0.00041426	0.153046	0.270226	0.33451	0.160282	33.6151	7.68576	57.0824	34.4674	0.188478	0.352428	0.88981	0.89585	0.89118	0.13906	0.58662	0.21727	0.24638	0.90549	0.95456
chr18:19756482-19756982_1	18	19756382	19756882	enh_prom	GATA6	cg27592331;cg12615165	0.914948	0.269959	-0.532904	0.0195396	0.360935	0.261185	33.2127	negative	-0.961764	0.924991	3.467e-05	0.0600843	0.270226	0.33451	0.160282	33.6151	7.68576	57.0824	34.4674	0.188478	0.352428	0.902765	0.91073	0.892915	0.190775	0.591875	0.075785	0.2214	0.916525	0.951805
chr6:16239436-16240034_1	6	16239336	16239836	enh_prom	GMPR	cg10768391;cg20001791	0.315488	0.0858213	-0.196539	0.00252495	0.215498	4.46507	17.3932	negative	-0.848483	0.719924	0.00383157	0.323701	4.5535	4.70023	4.46474	17.1373	8.20618	26.5496	17.6797	4.64049	3.9664	0.32776	0.265045	0.32855	0.110985	0.089085	0.05011	0.093105	0.35935	0.296735
chr16:19871730-19871730_1	16	19871480	19871980	enhancer	GPRC5B	cg07837520	0.923212	0.610677	-0.251978	0.0346593	0.388389	5.25083	27.3138	negative	-0.925738	0.856991	0.00034154	0.14646	2.42815	8.69366	7.70288	47.7972	11.2452	29.1153	21.0975	2.40408	5.02538	0.90934	0.92151	0.91645	0.48761	0.80546	0.58056	0.56908	0.91971	0.94905
chr9:139250562-139251062_1	9	139250462	139250962	enh_prom	GPSM1	cg14271150;cg13705014	0.386179	0.753301	0.31531	0.0135006	0.336088	28.401	15.893	negative	-0.836903	0.700407	0.00489942	0.351718	23.6185	21.5828	23.5516	12.9663	21.7882	11.9573	16.8602	38.3951	34.8569	0.45988	0.418045	0.36064	0.768815	0.53661	0.8837	0.82408	0.35223	0.3401
chr4:174449488-174453287_2	4	174449788	174450288	promoter	HAND2	cg16162058;cg01580681	0.066832	0.219726	0.125624	0.040084	0.39624	18.2468	4.47799	negative	-0.900236	0.810425	0.00093552	0.199809	18.9102	12.7228	19.4602	5.55503	10.199	0.466275	1.69167	20.6298	19.5108	0.071395	0.08031	0.08278	0.16404	0.166995	0.342235	0.205635	0.062355	0.03732
chr4:174449488-174453287_1	4	174449388	174449888	promoter	HAND2	cg04771946;cg16162058	0.072382	0.362721	0.233389	0.0482028	0.411316	18.2468	4.47799	negative	-0.931494	0.867681	0.000259	0.135933	18.9102	12.7228	19.4602	5.55503	10.199	0.466275	1.69167	20.6298	19.5108	0.13027	0.067185	0.063785	0.323755	0.156195	0.508055	0.46288	0.06653	0.03414
chr4:174447847-174448841_1	4	174447747	174448247	promoter	HAND2	cg27218796;cg01967399;cg01566965	0.091222	0.632947	0.434064	0.0492438	0.412555	18.2468	4.47799	negative	-0.930451	0.86574	0.00027278	0.136321	18.9102	12.7228	19.4602	5.55503	10.199	0.466275	1.69167	20.6298	19.5108	0.179987	0.06416	0.0742733	0.597987	0.235177	0.894163	0.80446	0.0592	0.07849
chr4:174447847-174448841_2	4	174448147	174448647	promoter	HAND2	cg10933003;cg24974365	0.085724	0.537841	0.368511	0.0365968	0.39104	18.2468	4.47799	negative	-0.938353	0.880507	0.00018026	0.116142	18.9102	12.7228	19.4602	5.55503	10.199	0.466275	1.69167	20.6298	19.5108	0.16609	0.07317	0.07885	0.49341	0.23843	0.707735	0.71179	0.06738	0.04313
chr4:174447847-174448841_3	4	174448547	174449047	promoter	HAND2	cg08297751;cg05155840;cg24974365	0.0619727	0.442243	0.309966	0.0356494	0.389771	18.2468	4.47799	negative	-0.950258	0.90299	8.608e-05	0.0816004	18.9102	12.7228	19.4602	5.55503	10.199	0.466275	1.69167	20.6298	19.5108	0.0861133	0.0656567	0.0656433	0.409377	0.197793	0.602393	0.55941	0.0614667	0.0309833
chr1:210820877-210820877_1	1	210820627	210821127	enhancer	HHAT	cg05380808	0.319828	0.613038	0.240174	0.022018	0.364808	2.99952	1.71791	negative	-0.869224	0.755551	0.00233793	0.267096	2.48129	2.65176	2.35574	2.17861	2.66799	0.656461	1.36859	4.52021	2.98858	0.4089	0.37648	0.2997	0.58144	0.47136	0.747	0.65235	0.23735	0.27671
chr7:27213893-27214383_2	7	27214193	27214693	enhancer	HOXA10	cg09411999;cg14649140	0.093772	0.21628	0.101709	0.0115794	0.32369	29.9398	4.65056	negative	-0.924888	0.855419	0.00035511	0.14873	29.2929	20.9189	26.6357	3.27419	12.7371	0.277751	2.31321	39.784	33.0673	0.10058	0.109505	0.110085	0.25569	0.19181	0.234095	0.183525	0.08637	0.06232
chr7:27216807-27217307_2	7	27217107	27217607	enh_prom	HOXA10	cg15864691	0.050108	0.622395	0.469116	0.0314738	0.382839	29.9398	4.65056	negative	-0.911805	0.831387	0.00061484	0.175688	29.2929	20.9189	26.6357	3.27419	12.7371	0.277751	2.31321	39.784	33.0673	0.05712	0.05899	0.05208	0.76651	0.23061	0.73476	0.7577	0.05373	0.02862
chr7:27219967-27220544_2	7	27220267	27220767	enh_prom	HOXA10	cg14188840	0.055662	0.493107	0.358586	0.0352915	0.389085	29.9398	4.65056	negative	-0.901925	0.813468	0.00088276	0.196232	29.2929	20.9189	26.6357	3.27419	12.7371	0.277751	2.31321	39.784	33.0673	0.07754	0.05893	0.0671	0.61993	0.20779	0.69439	0.45032	0.04782	0.02692
chr7:27215287-27215858_2	7	27215587	27216087	enh_prom	HOXA10	cg27157482	0.082546	0.369903	0.249366	0.00797154	0.298178	29.9398	4.65056	negative	-0.918452	0.843554	0.00047048	0.160263	29.2929	20.9189	26.6357	3.27419	12.7371	0.277751	2.31321	39.784	33.0673	0.08466	0.08348	0.08792	0.47059	0.26148	0.39645	0.35109	0.08472	0.07195
chr7:27211017-27211517_1	7	27210917	27211417	enh_prom	HOXA10	cg08938793	0.05065	0.43522	0.314394	0.02001	0.361983	29.9398	4.65056	negative	-0.935669	0.875476	0.0002087	0.127362	29.2929	20.9189	26.6357	3.27419	12.7371	0.277751	2.31321	39.784	33.0673	0.05098	0.05828	0.05801	0.44238	0.27843	0.56993	0.45014	0.05552	0.03046
chr7:27218867-27220049_1	7	27218767	27219267	promoter	HOXA10	cg10724867;cg04959634	0.038637	0.328015	0.240064	0.014369	0.340761	29.9398	4.65056	negative	-0.934601	0.873479	0.00022085	0.129028	29.2929	20.9189	26.6357	3.27419	12.7371	0.277751	2.31321	39.784	33.0673	0.049365	0.04406	0.045185	0.353315	0.23598	0.42503	0.297735	0.036255	0.01832
chr7:27215287-27215858_1	7	27215187	27215687	enh_prom	HOXA10	cg14935646;cg02483701	0.063058	0.387119	0.278309	0.00919385	0.310253	29.9398	4.65056	negative	-0.92479	0.855237	0.0003567	0.14873	29.2929	20.9189	26.6357	3.27419	12.7371	0.277751	2.31321	39.784	33.0673	0.066235	0.06546	0.074025	0.416245	0.274445	0.507315	0.35047	0.07277	0.0368
chr7:27219524-27220067_2	7	27219824	27220324	enh_prom_ins	HOXA10	cg05092861;cg01078824;cg05517976	0.0993613	0.341077	0.202497	0.0145359	0.341894	29.9398	4.65056	negative	-0.916566	0.840093	0.00050872	0.162899	29.2929	20.9189	26.6357	3.27419	12.7371	0.277751	2.31321	39.784	33.0673	0.11072	0.104237	0.118727	0.398303	0.260143	0.422223	0.28364	0.100233	0.06289
chr7:27216807-27217307_1	7	27216707	27217207	enh_prom	HOXA10	cg09636715	0.062216	0.60079	0.440352	0.037074	0.391714	29.9398	4.65056	negative	-0.898749	0.80775	0.00098376	0.201471	29.2929	20.9189	26.6357	3.27419	12.7371	0.277751	2.31321	39.784	33.0673	0.06226	0.06582	0.06635	0.68316	0.23511	0.87807	0.60682	0.07567	0.04098
chr7:27221373-27221873_1	7	27221273	27221773	enh_prom	HOXA11	cg05516617;cg26464446	0.062093	0.378049	0.261485	0.0275974	0.375363	25.7212	4.09668	negative	-0.886773	0.786367	0.00143732	0.226468	25.1224	20.841	21.6201	3.37353	11.2467	0	1.76647	34.6688	26.3537	0.075235	0.066675	0.06365	0.556155	0.209655	0.38325	0.363135	0.060415	0.04449
chr7:27220983-27220983_1	7	27220733	27221233	enhancer	HOXA11	cg08575233	0.122442	0.656462	0.436754	0.020532	0.364223	25.7212	4.09668	negative	-0.931405	0.867516	0.00026016	0.135933	25.1224	20.841	21.6201	3.37353	11.2467	0	1.76647	34.6688	26.3537	0.1931	0.13307	0.11573	0.77627	0.42645	0.81941	0.60372	0.11136	0.05895
chr7:27188454-27188954_1	7	27188354	27188854	enh_prom	HOXA6	cg19816811;cg16880946	0.128989	0.455996	0.258983	0.0456421	0.406902	3.16683	1.07245	negative	-0.934397	0.873097	0.00022323	0.129412	2.60189	3.15099	2.38925	1.43222	2.32205	0	0.535543	3.55998	4.13205	0.274615	0.075855	0.10593	0.460605	0.227215	0.570775	0.56539	0.117825	0.07072
chr7:27203180-27203830_1	7	27203080	27203580	enh_prom	HOXA9	cg21007852;cg03217995	0.083573	0.625989	0.439608	0.0316141	0.382937	15.7078	2.91597	negative	-0.978461	0.957386	4.728e-06	0.0342577	15.7681	12.6703	17.8182	1.20774	9.58569	0	0.870444	15.5018	16.7806	0.132995	0.071885	0.07866	0.71096	0.282545	0.786125	0.724325	0.09746	0.036865
chr7:27205730-27206304_1	7	27205630	27206130	enh_prom	HOXA9	cg15506609;cg22055728	0.025403	0.18612	0.132574	0.038136	0.393136	15.7078	2.91597	negative	-0.875146	0.76588	0.00199996	0.254561	15.7681	12.6703	17.8182	1.20774	9.58569	0	0.870444	15.5018	16.7806	0.031845	0.027865	0.026835	0.247335	0.12431	0.272135	0.1007	0.03105	0.00942
chr12:54412728-54413370_2	12	54413028	54413528	enh_prom	HOXC4	cg15772924;cg07080050	0.574459	0.213015	-0.290313	0.0287206	0.378104	0.117456	3.81386	negative	-0.957575	0.91695	4.968e-05	0.0712872	1.967e-30	0.451036	0.0574771	4.61202	1.26349	4.70073	4.67922	0.0263661	0.0524015	0.541495	0.57889	0.508045	0.225975	0.40671	0.09117	0.128205	0.683015	0.56085
chr12:54411928-54412570_1	12	54411828	54412328	enh_prom	HOXC4	cg15611151;cg17827660	0.232177	0.0828138	-0.11963	0.0428158	0.401568	0.117456	3.81386	negative	-0.978211	0.956898	4.922e-06	0.0342577	1.967e-30	0.451036	0.0574771	4.61202	1.26349	4.70073	4.67922	0.0263661	0.0524015	0.265045	0.22459	0.2216	0.06293	0.192385	0.024155	0.051785	0.248075	0.201575
chr12:54414427-54414427_1	12	54414177	54414677	enhancer	HOXC4	cg07915976	0.897092	0.662752	-0.191168	0.0302207	0.380531	0.117456	3.81386	negative	-0.976484	0.953521	6.417e-06	0.0342933	1.967e-30	0.451036	0.0574771	4.61202	1.26349	4.70073	4.67922	0.0263661	0.0524015	0.86826	0.91329	0.89059	0.63453	0.81647	0.62098	0.57903	0.86881	0.94451
chr12:54446944-54448913_6	12	54448844	54449344	promoter	HOXC4	cg16370398	0.833382	0.405725	-0.329802	0.0430248	0.402008	0.117456	3.81386	negative	-0.888858	0.790068	0.00134967	0.220193	1.967e-30	0.451036	0.0574771	4.61202	1.26349	4.70073	4.67922	0.0263661	0.0524015	0.74266	0.82921	0.83044	0.32675	0.521	0.54524	0.22991	0.86042	0.90418
chr2:10487314-10487314_1	2	10487064	10487564	enhancer	HPCAL1	cg10283844	0.244586	0.76535	0.448228	0.00426467	0.252543	43.2922	19.2858	negative	-0.974002	0.94868	9.095e-06	0.0375578	41.3805	39.7235	47.3845	21.6109	30.4264	12.1471	12.9588	39.2275	48.7448	0.3376	0.17324	0.20458	0.7303	0.59695	0.8895	0.84465	0.35393	0.15358
chr2:10526453-10526453_1	2	10526203	10526703	enhancer	HPCAL1	cg11938718	0.125572	0.480888	0.281622	0.0402163	0.396647	43.2922	19.2858	negative	-0.956642	0.915165	5.356e-05	0.0722649	41.3805	39.7235	47.3845	21.6109	30.4264	12.1471	12.9588	39.2275	48.7448	0.07977	0.08071	0.1429	0.39816	0.29541	0.60447	0.62551	0.25911	0.06537
chr4:143768477-143769002_1	4	143768377	143768877	prom_ins	INPP4B	cg03476007	0.207918	0.706605	0.409448	0.0103246	0.316809	8.88741	2.55328	negative	-0.838912	0.703773	0.0047012	0.346174	11.6274	4.59277	8.56462	2.69056	4.70462	1.27395	1.54398	10.5143	9.13795	0.30459	0.2817	0.16644	0.64414	0.67498	0.85352	0.65378	0.18493	0.10193
chr5:52150386-52150386_1	5	52150136	52150636	enhancer	ITGA1	cg26155697	0.389828	0.681415	0.236596	0.0340388	0.387304	56.2423	20.6547	negative	-0.885458	0.784035	0.00149464	0.22872	41.4577	39.1437	55.2344	17.1992	30.5893	8.31882	26.5115	69.6609	75.7146	0.49888	0.42645	0.44967	0.8203	0.50096	0.6613	0.7431	0.29965	0.27449
chr5:52190992-52190992_1	5	52190742	52191242	enhancer	ITGA1	cg24935345	0.609572	0.844285	0.194198	0.00967329	0.31201	56.2423	20.6547	negative	-0.927161	0.859627	0.00031963	0.143818	41.4577	39.1437	55.2344	17.1992	30.5893	8.31882	26.5115	69.6609	75.7146	0.72664	0.6508	0.58784	0.85847	0.78764	0.85795	0.87308	0.50326	0.57932
chr2:173296469-173296469_1	2	173296219	173296719	enhancer	ITGA6	cg01044293	0.712608	0.902658	0.190806	0.00018272	0.0854495	97.6591	18.9374	negative	-0.848552	0.720041	0.00382577	0.323434	114.233	58.4235	71.9688	9.91746	33.486	25.4604	6.88585	145.875	97.7954	0.75517	0.73542	0.6831	0.91808	0.91873	0.9084	0.86542	0.64777	0.74158
chr7:28143676-28143676_1	7	28143426	28143926	enhancer	JAZF1	cg17052756	0.114268	0.565213	0.364552	0.0386969	0.394267	40.6023	17.8359	negative	-0.868345	0.754023	0.00239126	0.270194	40.4765	57.2775	33.1558	14.315	36.1856	8.78417	12.0588	36.5023	35.5993	0.15101	0.13529	0.11075	0.57812	0.27182	0.79808	0.61283	0.10866	0.06563
chr7:28091875-28091875_1	7	28091625	28092125	enhancer	JAZF1	cg22377814	0.139356	0.69838	0.459346	0.0156583	0.347316	40.6023	17.8359	negative	-0.874171	0.764175	0.0020531	0.255441	40.4765	57.2775	33.1558	14.315	36.1856	8.78417	12.0588	36.5023	35.5993	0.14847	0.12594	0.20203	0.7462	0.47792	0.83703	0.73237	0.14955	0.07079
chr7:28102091-28102591_1	7	28101991	28102491	enh_ins	JAZF1	cg23597162	0.06627	0.458398	0.317336	0.0341244	0.387304	40.6023	17.8359	negative	-0.856277	0.733211	0.00321056	0.303713	40.4765	57.2775	33.1558	14.315	36.1856	8.78417	12.0588	36.5023	35.5993	0.08372	0.07903	0.07128	0.48465	0.24916	0.67164	0.42814	0.064	0.03332
chr19:11292181-11292181_1	19	11291931	11292431	enhancer	KANK2	cg23948443	0.575056	0.764868	0.158676	0.00996606	0.314615	69.1589	38.7081	negative	-0.857991	0.736148	0.00308397	0.300195	60.4966	67.3509	63.9923	26.1338	39.193	50.6304	38.8752	78.1367	75.8178	0.69824	0.58439	0.48897	0.77137	0.7867	0.74725	0.75415	0.53783	0.56585
chr19:11304981-11305481_1	19	11304881	11305381	enh_prom	KANK2	cg07478501	0.14767	0.409678	0.234336	0.0132129	0.334127	69.1589	38.7081	negative	-0.876769	0.768725	0.00191355	0.251357	60.4966	67.3509	63.9923	26.1338	39.193	50.6304	38.8752	78.1367	75.8178	0.18955	0.15398	0.14992	0.53462	0.23424	0.40473	0.46512	0.12387	0.12103
chr19:11304272-11304272_1	19	11304022	11304522	promoter	KANK2	cg12087891;cg08437802	0.48775	0.829638	0.313994	0.00024057	0.0956237	69.1589	38.7081	negative	-0.907563	0.823671	0.00072162	0.183864	60.4966	67.3509	63.9923	26.1338	39.193	50.6304	38.8752	78.1367	75.8178	0.53101	0.50277	0.50353	0.8639	0.80338	0.82875	0.82252	0.34137	0.56007
chr19:11306840-11307340_1	19	11306740	11307240	enh_prom	KANK2	cg21201109	0.144758	0.42609	0.23914	0.0234112	0.367854	69.1589	38.7081	negative	-0.920309	0.846969	0.00043484	0.155502	60.4966	67.3509	63.9923	26.1338	39.193	50.6304	38.8752	78.1367	75.8178	0.16972	0.17419	0.17131	0.61636	0.27947	0.39161	0.41692	0.09658	0.11199
chr19:11308682-11309263_1	19	11308582	11309082	enh_prom	KANK2	cg26878688;cg13516362;cg13658893	0.145647	0.351722	0.180597	0.00623916	0.280099	69.1589	38.7081	negative	-0.867607	0.752742	0.00243667	0.273174	60.4966	67.3509	63.9923	26.1338	39.193	50.6304	38.8752	78.1367	75.8178	0.169023	0.173817	0.157593	0.38841	0.244897	0.38699	0.386593	0.10908	0.11872
chr12:121971790-121971790_1	12	121971540	121972040	enhancer	KDM2B	cg08461425	0.371456	0.61786	0.237508	0.01521	0.344772	7.23395	5.12274	negative	-0.852394	0.726576	0.00351053	0.313192	6.00909	4.9501	8.03351	5.36515	4.00766	6.3127	4.80544	9.23134	7.94573	0.44721	0.4309	0.33503	0.60274	0.80581	0.41703	0.64586	0.31808	0.32606
chr16:85684821-85684853_1	16	85684587	85685087	enhancer	KIAA0182	cg08899895;cg26657404	0.320893	0.627821	0.248964	0.0336464	0.386495	12.5275	9.29716	negative	-0.859497	0.738736	0.00297556	0.294491	12.1359	12.0345	11.1467	8.80643	10.5598	9.90128	7.92113	14.5583	12.7619	0.319555	0.33382	0.352525	0.631305	0.433805	0.75794	0.688235	0.272965	0.3256
chr16:85650198-85650698_2	16	85650498	85650998	enh_ins	KIAA0182	cg26723054	0.275704	0.591228	0.272686	0.0138001	0.337593	12.5275	9.29716	negative	-0.847629	0.718475	0.00390431	0.326081	12.1359	12.0345	11.1467	8.80643	10.5598	9.90128	7.92113	14.5583	12.7619	0.35927	0.27777	0.24823	0.58105	0.39937	0.68241	0.70208	0.25583	0.23742
chr16:85650198-85650698_1	16	85650098	85650598	enh_ins	KIAA0182	cg07720851;cg05441854	0.107506	0.437396	0.276755	0.0149872	0.344289	12.5275	9.29716	negative	-0.864734	0.747764	0.00261916	0.280391	12.1359	12.0345	11.1467	8.80643	10.5598	9.90128	7.92113	14.5583	12.7619	0.17317	0.10813	0.10488	0.3844	0.296345	0.51497	0.55387	0.086235	0.065115
chr1:36004549-36004549_1	1	36004299	36004799	enhancer	KIAA0319L	cg13550410	0.754484	0.168692	-0.525788	0.0004017	0.114578	10.4824	18.6401	negative	-0.909487	0.827167	0.00067169	0.179953	11.1644	13.5486	8.75794	19.9517	18.9225	19.4852	16.2012	9.18724	9.75373	0.675	0.7836	0.8085	0.23768	0.18082	0.09468	0.16159	0.68988	0.81544
chr1:36005826-36005826_1	1	36005576	36006076	enhancer	KIAA0319L	cg15388210	0.396816	0.11044	-0.27642	4.714e-05	0.0546034	10.4824	18.6401	negative	-0.967071	0.935226	2.066e-05	0.0529533	11.1644	13.5486	8.75794	19.9517	18.9225	19.4852	16.2012	9.18724	9.75373	0.37731	0.37285	0.4643	0.09382	0.07503	0.07142	0.20149	0.37948	0.39014
chr4:154465115-154465115_1	4	154464865	154465365	enhancer	KIAA0922	cg16516091	0.893454	0.58156	-0.25437	0.0276337	0.375363	1.15501	8.78986	negative	-0.852643	0.727	0.00349076	0.31273	1.26916	1.19268	0.752533	10.7131	2.28877	13.3056	8.85198	1.30561	1.25506	0.87529	0.87358	0.91226	0.71524	0.64325	0.42004	0.54771	0.87828	0.92786
chr2:208013927-208014427_1	2	208013827	208014327	enh_prom	KLF7	cg19361800	0.853292	0.315323	-0.448182	0.0317348	0.383081	15.0561	24.4886	negative	-0.85436	0.729931	0.00335637	0.308106	11.8957	11.773	14.4664	25.2236	17.5874	30.7962	24.3471	16.5709	20.5747	0.87143	0.78055	0.86191	0.21268	0.7268	0.16404	0.15777	0.86707	0.8855
chr6:112575750-112576412_2	6	112576050	112576550	enh_prom	LAMA4	cg08844365;cg18080303;cg07628084	0.539365	0.30404	-0.201115	0.00739258	0.291969	50.1478	99.46	negative	-0.862417	0.743763	0.00277299	0.286974	54.8658	85.4546	55.3541	88.0087	165.8	79.3709	64.6603	12.468	42.5965	0.574207	0.463563	0.536597	0.302163	0.19957	0.354167	0.36026	0.580197	0.54226
chr3:189840054-189840554_1	3	189839954	189840454	enh_ins	LEPREL1	cg18132405	0.909286	0.722283	-0.220972	0.00685788	0.287024	17.0289	44.3825	negative	-0.862054	0.743136	0.00279765	0.287944	9.13	12.6927	19.4257	70.2	57.2542	25.2698	24.8059	21.7256	22.1704	0.90839	0.90943	0.88789	0.64418	0.70305	0.81975	0.72215	0.90755	0.93317
chr3:45718805-45718805_1	3	45718555	45719055	enhancer	LIMD1	cg16283183	0.085148	0.601328	0.419994	0.0266379	0.374154	7.35404	6.00626	negative	-0.865068	0.748342	0.00259746	0.280391	7.55359	7.2187	7.95299	5.63515	7.90414	4.6225	5.86327	7.15682	6.88809	0.07237	0.09657	0.09451	0.67224	0.32678	0.79145	0.61484	0.10073	0.06156
chr7:1953969-1954008_1	7	1953738	1954238	enhancer	MAD1L1	cg23667108;cg01301117	0.522637	0.834319	0.26198	0.0121821	0.326817	14.1302	8.61516	negative	-0.835916	0.698756	0.00499891	0.353815	12.4866	10.0061	14.2367	9.69098	8.48285	8.37511	7.91171	18.7735	15.1482	0.45098	0.61734	0.578655	0.85973	0.737795	0.918355	0.821395	0.33283	0.63338
chr7:1881761-1882385_2	7	1882061	1882561	enh_ins	MAD1L1	cg24813613	0.724152	0.894695	0.162752	0.0041625	0.251822	14.1302	8.61516	negative	-0.873349	0.762738	0.00209869	0.256404	12.4866	10.0061	14.2367	9.69098	8.48285	8.37511	7.91171	18.7735	15.1482	0.73639	0.78522	0.72489	0.91974	0.81255	0.94912	0.89737	0.60423	0.77003
chr4:140877994-140877994_1	4	140877744	140878244	enhancer	MAML3	cg14181271	0.184224	0.457813	0.22006	0.026147	0.37345	4.46635	1.97744	negative	-0.948498	0.899649	9.704e-05	0.089234	3.60263	5.4166	3.94071	1.09473	3.66448	1.79147	1.35907	5.05749	4.31434	0.25104	0.19536	0.24687	0.50214	0.30371	0.51482	0.51058	0.09061	0.13724
chr4:140657196-140657696_1	4	140657096	140657596	enh_prom	MAML3	cg12426146;cg17540159	0.218901	0.470914	0.204341	0.0159933	0.348437	4.46635	1.97744	negative	-0.89485	0.800756	0.00111845	0.210408	3.60263	5.4166	3.94071	1.09473	3.66448	1.79147	1.35907	5.05749	4.31434	0.2325	0.233635	0.238405	0.497685	0.39599	0.521355	0.468625	0.202655	0.18731
chr5:112417701-112417701_1	5	112417451	112417951	enhancer	MCC	cg08213909	0.78389	0.602583	-0.210758	0.00530461	0.268346	2.46761	9.09486	negative	-0.939328	0.882337	0.00017064	0.113445	3.26074	3.86669	1.7312	15.4362	3.85927	9.37449	7.70946	1.42855	2.05089	0.74161	0.7795	0.75936	0.51195	0.68937	0.56563	0.64338	0.80841	0.83057
chr5:112608004-112608004_1	5	112607754	112608254	enhancer	MCC	cg04138046	0.85266	0.283332	-0.449776	0.0442073	0.404655	2.46761	9.09486	negative	-0.852674	0.727052	0.00348833	0.312604	3.26074	3.86669	1.7312	15.4362	3.85927	9.37449	7.70946	1.42855	2.05089	0.83893	0.84515	0.84584	0.21192	0.6627	0.12687	0.13184	0.87516	0.85822
chr3:127504560-127504560_1	3	127504310	127504810	enhancer	MGLL	cg11133226	0.330664	0.585675	0.216536	0.0376839	0.392624	105.639	40.9452	negative	-0.841426	0.707998	0.00446092	0.340543	87.1517	151.518	130.221	15.352	124.516	11.2937	12.6192	68.9587	90.3451	0.34546	0.30222	0.35971	0.70459	0.36717	0.69336	0.57758	0.28496	0.36097
chr3:69797108-69797108_1	3	69796858	69797358	enhancer	MITF	cg18496212	0.039638	0.60498	0.461566	0.0207557	0.364384	22.7236	4.67514	negative	-0.911139	0.830174	0.00063082	0.176378	23.6207	15.4699	20.4933	2.41991	12.1594	2.25554	1.86573	30.8344	23.1998	0.0725	0.01548	0.04517	0.77995	0.35752	0.67889	0.60356	0.04011	0.02493
chr3:69819855-69819855_1	3	69819605	69820105	enhancer	MITF	cg03489020	0.25059	0.618398	0.311288	0.0331863	0.385891	22.7236	4.67514	negative	-0.879467	0.773462	0.00177577	0.244889	23.6207	15.4699	20.4933	2.41991	12.1594	2.25554	1.86573	30.8344	23.1998	0.18868	0.25399	0.38711	0.67375	0.3358	0.85377	0.61027	0.2174	0.20577
chr21:35473313-35473313_1	21	35473063	35473563	enhancer	MRPS6	cg07707891	0.11971	0.349592	0.188636	0.0349023	0.388796	109.654	46.4648	negative	-0.845176	0.714323	0.00411834	0.33264	94.8503	95.1157	152.724	42.1823	89.9225	33.6118	20.1428	117.91	87.6684	0.11431	0.18296	0.1292	0.29172	0.21133	0.45453	0.44079	0.09743	0.07465
chr21:35447965-35448465_1	21	35447865	35448365	enh_prom	MRPS6	cg21291385	0.066494	0.630875	0.462668	0.0226121	0.366088	109.654	46.4648	negative	-0.876199	0.767724	0.00194363	0.253212	94.8503	95.1157	152.724	42.1823	89.9225	33.6118	20.1428	117.91	87.6684	0.06331	0.07505	0.07977	0.66265	0.33585	0.77543	0.74957	0.07135	0.04299
chr17:8383621-8383800_1	17	8383460	8383960	enhancer	MYH10	cg21289738;cg21871213;cg07257505	0.861737	0.578627	-0.225955	0.0439778	0.404243	53.6047	168.364	negative	-0.890247	0.79254	0.00129335	0.2196	41.6554	59.7168	45.9208	57.5649	119.033	296.414	200.444	45.7641	74.9665	0.85511	0.855227	0.856797	0.626353	0.708573	0.38693	0.59265	0.8614	0.88015
chr4:174449488-174453287_9	4	174452588	174453088	promoter	NBLA00301	cg10024909;cg21382382;cg09339763;cg16919569	0.095752	0.542324	0.365708	0.0208391	0.364384	2.80008	0.843602	negative	-0.904999	0.819023	0.0007921	0.187702	2.99157	2.94374	2.98411	0.549022	2.59803	0	0.227357	1.89119	3.1898	0.238165	0.0499275	0.056655	0.620578	0.300648	0.57054	0.67753	0.0962325	0.03778
chr4:174458502-174460124_3	4	174459202	174459702	promoter	NBLA00301	cg11236429	0.177926	0.380575	0.183914	0.0222431	0.364808	2.80008	0.843602	negative	-0.84472	0.713552	0.00415899	0.333275	2.99157	2.94374	2.98411	0.549022	2.59803	0	0.227357	1.89119	3.1898	0.26886	0.19524	0.12673	0.50793	0.22784	0.33493	0.4516	0.23224	0.06656
chr4:174458502-174460124_1	4	174458402	174458902	promoter	NBLA00301	cg21383280;cg19095920	0.180955	0.551096	0.307314	0.0225114	0.36575	2.80008	0.843602	negative	-0.941169	0.885798	0.00015348	0.106916	2.99157	2.94374	2.98411	0.549022	2.59803	0	0.227357	1.89119	3.1898	0.25502	0.149155	0.13811	0.69699	0.3175	0.587335	0.60256	0.26634	0.09615
chr4:174452129-174452688_2	4	174452429	174452929	enh_prom	NBLA00301	cg16919569;cg07681935;cg09339763	0.0888127	0.585466	0.404825	0.0190818	0.359677	2.80008	0.843602	negative	-0.894665	0.800425	0.00112514	0.210408	2.99157	2.94374	2.98411	0.549022	2.59803	0	0.227357	1.89119	3.1898	0.237473	0.04672	0.05346	0.660833	0.350417	0.606107	0.724507	0.0813967	0.0250133
chr4:174458502-174460124_2	4	174458802	174459302	promoter	NBLA00301	cg19095920;cg22322465	0.236157	0.572744	0.28924	0.0207429	0.364384	2.80008	0.843602	negative	-0.940995	0.885471	0.00015505	0.107454	2.99157	2.94374	2.98411	0.549022	2.59803	0	0.227357	1.89119	3.1898	0.263025	0.22438	0.20188	0.743755	0.335895	0.587585	0.62374	0.32576	0.16574
chr4:174449488-174453287_10	4	174452988	174453488	promoter	NBLA00301	cg26805882;cg15234400	0.097873	0.585392	0.395857	0.0295	0.379262	2.80008	0.843602	negative	-0.913411	0.83432	0.00057745	0.173586	2.99157	2.94374	2.98411	0.549022	2.59803	0	0.227357	1.89119	3.1898	0.22959	0.080025	0.051645	0.72227	0.276975	0.62931	0.713015	0.081215	0.04689
chr9:14312435-14312435_1	9	14312185	14312685	promoter	NFIB	cg02976355	0.871212	0.630835	-0.19117	0.0407704	0.397991	0.0764655	9.80119	negative	-0.942235	0.887808	0.00014411	0.103615	0.0533627	0.222273	0.0481333	9.35921	2.91083	14.2495	12.6852	0.00976813	0.0487904	0.80973	0.85311	0.87013	0.57593	0.79695	0.59795	0.55251	0.87455	0.94854
chr19:13120455-13120955_1	19	13120355	13120855	enh_prom	NFIX	cg01989908	0.734368	0.483623	-0.196828	0.0413728	0.39905	6.88348	34.4706	negative	-0.916473	0.839923	0.00051065	0.162899	9.37008	7.65625	5.3781	32.3644	13.4603	49.3578	42.6999	4.7189	7.29408	0.71492	0.70479	0.75912	0.58863	0.56145	0.38604	0.39837	0.68697	0.80604
chr19:13125315-13125815_1	19	13125215	13125715	enh_prom	NFIX	cg17928147	0.30645	0.101013	-0.183676	0.00148547	0.180952	6.88348	34.4706	negative	-0.838993	0.70391	0.00469327	0.34609	9.37008	7.65625	5.3781	32.3644	13.4603	49.3578	42.6999	4.7189	7.29408	0.25086	0.31455	0.3874	0.10402	0.13931	0.07879	0.08193	0.23004	0.3494
chr9:139438040-139438540_1	9	139437940	139438440	enh_prom	NOTCH1	cg01909856	0.456614	0.765473	0.260296	0.0426984	0.401345	4.99027	3.09836	negative	-0.860678	0.740766	0.00289246	0.291768	4.778	4.09576	4.93539	3.97994	3.87127	1.92569	2.61653	6.13018	5.01201	0.49516	0.51927	0.46227	0.84388	0.46916	0.87028	0.87857	0.32474	0.48163
chr2:206549567-206550067_1	2	206549467	206549967	enh_prom	NRP2	cg02185666	0.514584	0.127803	-0.294679	0.0447292	0.405259	11.1781	114.65	negative	-0.910362	0.828759	0.00168171	0.238913	9.53665	5.82239	9.03537	100.331	53.0095	177.584	127.676	14.5468	16.9495	0.41266	0.48643	0.54123	0.11138		0.09473	0.1773	0.5121	0.6205
chr14:79511907-79511907_1	14	79511657	79512157	enhancer	NRXN3	cg07182163	0.067884	0.42347	0.290702	0.0312381	0.382341	14.9491	6.74546	negative	-0.914273	0.835896	0.00055806	0.170795	13.7621	16.7319	10.0678	8.21256	10.8448	3.181	4.74349	15.3354	18.8484	0.06215	0.07235	0.08152	0.3718	0.22652	0.59352	0.50204	0.08485	0.03855
chr11:71737549-71737549_1	11	71737299	71737799	enhancer	NUMA1	cg11196788	0.559306	0.775567	0.20469	0.00139075	0.176699	55.4644	30.8779	negative	-0.868214	0.753796	0.00239928	0.270491	57.5757	45.3241	53.7686	31.5492	33.0954	31.2211	27.6459	62.2582	58.3955	0.57841	0.60202	0.51816	0.72269	0.88824	0.72031	0.77103	0.5191	0.57884
chr17:753545-754463_1	17	753445	753945	enhancer	NXN	cg17113147	0.486784	0.787968	0.290378	0.00536412	0.26923	56.5423	26.5082	negative	-0.85536	0.731641	0.00327973	0.305732	67.0028	52.3461	49.5533	22.1077	63.6694	13.4155	6.8402	57.4642	56.3449	0.61217	0.45305	0.43869	0.8453	0.55863	0.89188	0.85606	0.47138	0.45863
chr17:800384-801063_2	17	800684	801184	enh_prom	NXN	cg14235846;cg08190450;cg23749637	0.231295	0.775966	0.485012	0.0102612	0.316388	56.5423	26.5082	negative	-0.919595	0.845654	0.00044832	0.157153	67.0028	52.3461	49.5533	22.1077	63.6694	13.4155	6.8402	57.4642	56.3449	0.243057	0.255603	0.23748	0.856357	0.43489	0.92593	0.886687	0.22491	0.195427
chr17:750541-751041_1	17	750441	750941	enh_prom	NXN	cg14008999	0.128284	0.712292	0.484166	0.0187878	0.358623	56.5423	26.5082	negative	-0.880472	0.775231	0.00172624	0.241596	67.0028	52.3461	49.5533	22.1077	63.6694	13.4155	6.8402	57.4642	56.3449	0.2224	0.09352	0.13314	0.73782	0.4046	0.87078	0.83597	0.11482	0.07754
chr17:750941-751441_1	17	750841	751341	enh_prom	NXN	cg14827391;cg16441900	0.132054	0.700434	0.508244	0.00767569	0.295379	56.5423	26.5082	negative	-0.868025	0.753468	0.00241087	0.271494	67.0028	52.3461	49.5533	22.1077	63.6694	13.4155	6.8402	57.4642	56.3449	0.22144	0.11976	0.132615	0.833445	0.368395	0.870825	0.72907	0.126515	0.05994
chr17:872662-873162_1	17	872562	873062	enh_prom	NXN	cg15019011;cg14136893	0.05922	0.610954	0.460444	0.0187249	0.358389	56.5423	26.5082	negative	-0.877995	0.770874	0.00185009	0.247785	67.0028	52.3461	49.5533	22.1077	63.6694	13.4155	6.8402	57.4642	56.3449	0.065975	0.062895	0.072845	0.52266	0.368755	0.818915	0.733485	0.06356	0.030825
chr17:799984-800663_2	17	800284	800784	enh_prom	NXN	cg08190450;cg19956147;cg23749637;cg14235846;cg06604589	0.188213	0.70017	0.445732	0.0146426	0.342437	56.5423	26.5082	negative	-0.918926	0.844424	0.0004612	0.157815	67.0028	52.3461	49.5533	22.1077	63.6694	13.4155	6.8402	57.4642	56.3449	0.210326	0.209966	0.189598	0.77271	0.36925	0.85997	0.798748	0.180552	0.150624
chr17:799984-800663_1	17	799884	800384	enh_prom	NXN	cg02273477;cg19669385;cg20764358	0.078366	0.61844	0.437148	0.0375919	0.392359	56.5423	26.5082	negative	-0.917484	0.841777	0.00048984	0.162043	67.0028	52.3461	49.5533	22.1077	63.6694	13.4155	6.8402	57.4642	56.3449	0.1513	0.08793	0.0498367	0.709763	0.23121	0.77037	0.762417	0.0783033	0.02446
chr17:853971-854068_1	17	853770	854270	enhancer	NXN	cg09651648;cg08031967;cg22160185	0.235031	0.634517	0.326477	0.0294521	0.379242	56.5423	26.5082	negative	-0.909901	0.82792	0.00066129	0.178792	67.0028	52.3461	49.5533	22.1077	63.6694	13.4155	6.8402	57.4642	56.3449	0.274323	0.23622	0.235757	0.705127	0.386267	0.664697	0.78198	0.20902	0.219837
chr17:800163-800884_2	17	800463	800963	enh_prom	NXN	cg23749637;cg06604589;cg08190450;cg14235846	0.19384	0.723371	0.464447	0.0119801	0.32583	56.5423	26.5082	negative	-0.9177	0.842173	0.00048548	0.161852	67.0028	52.3461	49.5533	22.1077	63.6694	13.4155	6.8402	57.4642	56.3449	0.20799	0.212773	0.1992	0.791775	0.398242	0.8702	0.833265	0.189128	0.160112
chr17:840950-841205_1	17	840828	841328	enhancer	NXN	cg16885779;cg05322931;cg10241823	0.236927	0.699559	0.384166	0.0240536	0.369419	56.5423	26.5082	negative	-0.922666	0.851312	0.0003924	0.150382	67.0028	52.3461	49.5533	22.1077	63.6694	13.4155	6.8402	57.4642	56.3449	0.208297	0.245253	0.272173	0.777	0.41048	0.84772	0.763037	0.21224	0.24667
chr11:3177622-3178322_1	11	3177522	3178022	enhancer	OSBPL5	cg25627263;cg06005892;cg03174521	0.233803	0.716326	0.379496	0.0419055	0.399705	14.8451	7.72389	negative	-0.972225	0.945221	1.144e-05	0.0405857	11.6519	15.0752	13.5519	6.71608	11.9913	5.56014	6.62805	16.9198	17.0266	0.394383	0.254977	0.17756	0.79851	0.404813	0.870043	0.791937	0.19419	0.147907
chr11:3181746-3182274_2	11	3182046	3182546	enh_prom	OSBPL5	cg16129132	0.181592	0.400512	0.174536	0.0302076	0.380531	14.8451	7.72389	negative	-0.985257	0.970732	1.263e-06	0.0266786	11.6519	15.0752	13.5519	6.71608	11.9913	5.56014	6.62805	16.9198	17.0266	0.2545	0.22749	0.19899	0.43515	0.27638	0.45113	0.43939	0.12199	0.10499
chr11:3175552-3175636_1	11	3175344	3175844	enhancer	OSBPL5	cg15964132;cg18591228;cg00500359	0.22591	0.714826	0.392657	0.0322222	0.384302	14.8451	7.72389	negative	-0.964091	0.929471	2.789e-05	0.0557384	11.6519	15.0752	13.5519	6.71608	11.9913	5.56014	6.62805	16.9198	17.0266	0.38589	0.18636	0.18762	0.793285	0.41036	0.88706	0.7686	0.256665	0.113015
chr11:3164631-3164851_1	11	3164491	3164991	enhancer	OSBPL5	cg08731067;cg24931954;cg10495980	0.487228	0.805473	0.302379	4.593e-05	0.0542596	14.8451	7.72389	negative	-0.862637	0.744142	0.00275812	0.28632	11.6519	15.0752	13.5519	6.71608	11.9913	5.56014	6.62805	16.9198	17.0266	0.54937	0.553623	0.45773	0.806333	0.816163	0.82964	0.769753	0.407723	0.467693
chr8:99963407-99963907_1	8	99963307	99963807	enh_prom	OSR2	cg09607488	0.06602	0.662623	0.504094	0.0184441	0.358198	18.4651	3.91962	negative	-0.864431	0.74724	0.00263893	0.280812	27.9246	20.7841	14.4647	1.63184	9.27501	3.29561	1.47602	13.4455	15.7066	0.07824	0.07199	0.06353	0.8633	0.31297	0.71032	0.7639	0.08135	0.03499
chr8:99961330-99961830_1	8	99961230	99961730	enh_prom	OSR2	cg08202494;cg00388812	0.08378	0.606569	0.445919	0.012033	0.326068	18.4651	3.91962	negative	-0.854698	0.730509	0.00333032	0.307099	27.9246	20.7841	14.4647	1.63184	9.27501	3.29561	1.47602	13.4455	15.7066	0.09847	0.097285	0.07321	0.688575	0.35724	0.76138	0.61908	0.09516	0.054775
chr8:99961330-99961830_2	8	99961630	99962130	enh_prom	OSR2	cg01581084;cg16746576	0.059335	0.511186	0.381675	0.0190171	0.359646	18.4651	3.91962	negative	-0.859176	0.738184	0.00299844	0.2952	27.9246	20.7841	14.4647	1.63184	9.27501	3.29561	1.47602	13.4455	15.7066	0.072585	0.069295	0.057785	0.658785	0.242775	0.53627	0.606915	0.059225	0.037785
chr1:151282686-151282686_1	1	151282436	151282936	enhancer	PI4KB	cg12083852	0.250282	0.422725	0.154414	0.0131638	0.333808	37.9085	23.0641	negative	-0.927033	0.85939	0.00032156	0.14404	38.2285	34.0663	40.7302	24.8867	30.3135	17.0016	20.0544	40.2211	36.2966	0.25537	0.27798	0.26775	0.39991	0.31818	0.44725	0.52556	0.23412	0.21619
chr1:151297650-151298150_1	1	151297550	151298050	enh_prom	PI4KB	cg06122613	0.07131	0.47034	0.315912	0.0467876	0.408966	37.9085	23.0641	negative	-0.932121	0.868849	0.00025096	0.13404	38.2285	34.0663	40.7302	24.8867	30.3135	17.0016	20.0544	40.2211	36.2966	0.06882	0.03365	0.05887	0.44531	0.20344	0.62489	0.60772	0.16333	0.03188
chr5:67586070-67586570_2	5	67586370	67586870	enh_prom	PIK3R1	cg25091228	0.269914	0.760297	0.396116	0.0177958	0.355	13.3904	7.22088	negative	-0.884391	0.782148	0.00154224	0.231813	9.70701	9.87783	16.1544	7.8944	7.83941	5.65428	7.49545	12.7357	18.4772	0.48109	0.27356	0.18123	0.78938	0.55847	0.83707	0.85627	0.30646	0.10723
chr3:16974160-16974681_2	3	16974460	16974960	enhancer	PLCL2	cg24159436	0.919098	0.463537	-0.367792	0.0402276	0.396647	0.778861	1.70258	negative	-0.88819	0.788882	0.00137733	0.221802	1.12409	0.617922	1.0053	1.99334	0.669483	2.40666	1.74083	0.672386	0.474606	0.90482	0.9179	0.92207	0.56265	0.72472	0.2201	0.34668	0.87988	0.97082
chr3:129326523-129327023_1	3	129326423	129326923	enh_prom	PLXND1	cg03849731;cg08844900	0.484465	0.665235	0.175503	0.00076556	0.14656	21.4525	8.37048	negative	-0.841886	0.708772	0.00441789	0.33932	16.9083	16.8556	15.9556	7.28396	9.45129	5.70515	11.0415	32.5108	25.0324	0.44551	0.553615	0.49237	0.711325	0.59752	0.68606	0.666035	0.410615	0.520215
chr17:64688496-64688496_1	17	64688246	64688746	enhancer	PRKCA	cg19325477	0.4177	0.855958	0.380292	0.00225998	0.209836	44.9788	21.6373	negative	-0.887474	0.787611	0.00140741	0.223896	54.642	32.8296	38.8262	17.8636	22.2413	21.8177	24.6267	50.9193	47.6769	0.44085	0.43306	0.49018	0.8657	0.7585	0.89883	0.9008	0.3702	0.35421
chr1:170639289-170639289_1	1	170639039	170639539	enhancer	PRRX1	cg11954332	0.082754	0.78765	0.573566	0.013234	0.334183	30.4657	12.2483	negative	-0.84646	0.716495	0.00400532	0.328559	39.63	28.2129	35.9894	11.8912	14.6281	10.0792	12.3947	30.8274	17.669	0.07503	0.11442	0.08489	0.81104	0.66221	0.81449	0.86286	0.0684	0.07103
chr8:129079496-129079496_1	8	129079246	129079746	enhancer	PVT1	cg07305933	0.72353	0.376572	-0.313818	0.00637221	0.280929	2.69597	4.40108	negative	-0.898843	0.807919	0.00098066	0.201385	3.22713	2.75579	2.4701	4.13444	3.55875	5.05806	4.85307	2.2518	2.77505	0.74178	0.66684	0.6909	0.30444	0.57781	0.37271	0.25133	0.73996	0.77817
chr13:114842706-114843024_1	13	114842615	114843115	enhancer	RASA3	cg06698414;cg04349855	0.467867	0.734496	0.234487	0.00210075	0.204269	24.464	14.2855	negative	-0.914506	0.836321	0.00055291	0.169737	24.9384	20.9557	24.0747	15.7793	19.0314	9.252	13.0794	29.3025	23.0488	0.558985	0.55163	0.41806	0.710675	0.68631	0.809725	0.731275	0.3961	0.41456
chr13:114800882-114801509_2	13	114801182	114801682	enh_prom	RASA3	cg15082473;cg23466769	0.196916	0.69484	0.398197	0.0385849	0.394009	24.464	14.2855	negative	-0.906631	0.821979	0.00074671	0.186848	24.9384	20.9557	24.0747	15.7793	19.0314	9.252	13.0794	29.3025	23.0488	0.315285	0.21583	0.16509	0.785885	0.360685	0.87794	0.75485	0.150515	0.13786
chr13:114812177-114813509_1	13	114812077	114812577	enhancer	RASA3	cg12667002;cg11759552;cg20028528	0.572605	0.758801	0.162715	0.00716827	0.290895	24.464	14.2855	negative	-0.913223	0.833976	0.00058174	0.173586	24.9384	20.9557	24.0747	15.7793	19.0314	9.252	13.0794	29.3025	23.0488	0.617537	0.580163	0.55395	0.762947	0.664587	0.781507	0.826163	0.535807	0.57557
chr13:114810631-114810794_1	13	114810462	114810962	enhancer	RASA3	cg03859846;cg10626896;cg19462022	0.147348	0.712216	0.482104	0.0119943	0.32583	24.464	14.2855	negative	-0.925521	0.856589	0.00034497	0.146678	24.9384	20.9557	24.0747	15.7793	19.0314	9.252	13.0794	29.3025	23.0488	0.196117	0.18491	0.13224	0.771737	0.426967	0.88048	0.76968	0.124487	0.0989867
chr13:114810096-114810096_1	13	114809846	114810346	enhancer	RASA3	cg09020213	0.096306	0.628965	0.438314	0.0312223	0.382308	24.464	14.2855	negative	-0.929009	0.863058	0.00029267	0.140238	24.9384	20.9557	24.0747	15.7793	19.0314	9.252	13.0794	29.3025	23.0488	0.13729	0.10964	0.10027	0.64591	0.27837	0.86242	0.72916	0.07481	0.05952
chr13:114875001-114875412_2	13	114875301	114875801	enhancer	RASA3	cg21261158	0.028102	0.645605	0.509798	0.037809	0.392862	24.464	14.2855	negative	-0.914513	0.836333	0.00055276	0.169737	24.9384	20.9557	24.0747	15.7793	19.0314	9.252	13.0794	29.3025	23.0488	0.01211	0.04268	0.04751	0.73048	0.1647	0.9087	0.77854	0.01663	0.02158
chr13:114872102-114872787_2	13	114872402	114872902	enhancer	RASA3	cg24132632;cg27086157;cg07416344	0.598572	0.74322	0.133115	0.0218504	0.364808	24.464	14.2855	negative	-0.863939	0.74639	0.00267124	0.283151	24.9384	20.9557	24.0747	15.7793	19.0314	9.252	13.0794	29.3025	23.0488	0.64281	0.577685	0.614705	0.78253	0.647055	0.779105	0.76419	0.46987	0.68779
chr13:114834683-114834922_1	13	114834552	114835052	enhancer	RASA3	cg11997468;cg05296619	0.12613	0.29324	0.138811	0.0207412	0.364384	24.464	14.2855	negative	-0.882779	0.7793	0.00161618	0.234464	24.9384	20.9557	24.0747	15.7793	19.0314	9.252	13.0794	29.3025	23.0488	0.136285	0.163175	0.12869	0.344655	0.190915	0.32974	0.30765	0.12171	0.08079
chr13:114812177-114813509_2	13	114812477	114812977	enhancer	RASA3	cg08707963;cg12938556	0.148417	0.607258	0.377009	0.0373553	0.392072	24.464	14.2855	negative	-0.886739	0.786306	0.00143879	0.226468	24.9384	20.9557	24.0747	15.7793	19.0314	9.252	13.0794	29.3025	23.0488	0.227605	0.198295	0.149455	0.633945	0.26148	0.70531	0.828295	0.109795	0.056935
chr13:114843594-114843594_1	13	114843344	114843844	enhancer	RASA3	cg26274891;cg20691608	0.122928	0.50745	0.318452	0.0264516	0.374133	24.464	14.2855	negative	-0.91921	0.844948	0.00045569	0.157584	24.9384	20.9557	24.0747	15.7793	19.0314	9.252	13.0794	29.3025	23.0488	0.1439	0.152	0.10636	0.53491	0.26113	0.6501	0.58366	0.12764	0.08474
chr13:114832833-114832833_1	13	114832583	114833083	enhancer	RASA3	cg01334831	0.19407	0.432798	0.192974	0.045313	0.406509	24.464	14.2855	negative	-0.894914	0.800872	0.00111612	0.210408	24.9384	20.9557	24.0747	15.7793	19.0314	9.252	13.0794	29.3025	23.0488	0.22145	0.25565	0.22769	0.49812	0.29066	0.5824	0.36001	0.14117	0.12439
chr13:114875001-114875412_1	13	114874901	114875401	enhancer	RASA3	cg22631818;cg24113818;cg04118910;cg00732810	0.190243	0.577761	0.342514	0.00753601	0.293372	24.464	14.2855	negative	-0.911361	0.830579	0.00062545	0.176378	24.9384	20.9557	24.0747	15.7793	19.0314	9.252	13.0794	29.3025	23.0488	0.207143	0.242785	0.181915	0.6552	0.390925	0.722753	0.542165	0.184062	0.135307
chr13:114800882-114801509_1	13	114800782	114801282	enh_prom	RASA3	cg18021101;cg00502575;cg00814985;cg21107044	0.439609	0.751923	0.25267	0.0213687	0.364433	24.464	14.2855	negative	-0.922778	0.851519	0.00039045	0.150382	24.9384	20.9557	24.0747	15.7793	19.0314	9.252	13.0794	29.3025	23.0488	0.473203	0.483888	0.42312	0.759275	0.613058	0.844437	0.790922	0.435283	0.38255
chr13:114812177-114813509_3	13	114812877	114813377	enhancer	RASA3	cg12938556;cg03646740	0.185248	0.523206	0.289889	0.0152754	0.345475	24.464	14.2855	negative	-0.862868	0.744541	0.00274257	0.28632	24.9384	20.9557	24.0747	15.7793	19.0314	9.252	13.0794	29.3025	23.0488	0.28186	0.248535	0.143905	0.519225	0.3178	0.56906	0.68674	0.17002	0.08192
chr13:114800309-114801587_2	13	114800609	114801109	enhancer	RASA3	cg21107044;cg18021101;cg00502575	0.535544	0.783273	0.199955	0.0139429	0.338184	24.464	14.2855	negative	-0.894127	0.799463	0.00114477	0.210408	24.9384	20.9557	24.0747	15.7793	19.0314	9.252	13.0794	29.3025	23.0488	0.56419	0.58223	0.52509	0.801803	0.719497	0.82469	0.787103	0.530467	0.475743
chr5:80255793-80257322_4	5	80256893	80257393	promoter	RASGRF2	cg17330048;cg07183876;cg00888521	0.542068	0.226251	-0.268469	0.00932156	0.31064	1.35164	5.13462	negative	-0.861744	0.742603	0.00281877	0.289166	0.489091	2.12787	1.79084	5.29761	1.3169	8.08869	5.83527	1.44152	0.90886	0.582663	0.488833	0.556697	0.331063	0.287437	0.117327	0.169177	0.501203	0.580943
chr6:17282490-17283100_2	6	17282790	17283290	enh_ins	RBM24	cg23207527;cg23146346	0.126325	0.610004	0.404336	0.0108624	0.319323	23.6276	9.77404	negative	-0.867699	0.752901	0.00243099	0.272944	29.312	17.8319	21.1433	8.06803	14.2509	5.80902	10.9682	22.6035	27.2473	0.153125	0.084025	0.171105	0.69907	0.43943	0.609375	0.69214	0.09711	0.12626
chr6:17282851-17283500_1	6	17282751	17283251	enh_prom	RBM24	cg23146346;cg02066331;cg15753394;cg02311932;cg23207527	0.0720164	0.362355	0.240549	0.0165939	0.350074	23.6276	9.77404	negative	-0.857051	0.734536	0.00315298	0.301411	29.312	17.8319	21.1433	8.06803	14.2509	5.80902	10.9682	22.6035	27.2473	0.083696	0.056054	0.097264	0.449378	0.247098	0.33003	0.422914	0.059786	0.063282
chr2:161245200-161245200_1	2	161244950	161245450	enhancer	RBMS1	cg00335252	0.197924	0.563203	0.298772	0.0241798	0.369791	28.6992	19.9729	negative	-0.887391	0.787462	0.00141096	0.224343	28.6624	26.1266	28.2648	20.8549	28.1457	16.3512	14.5397	31.181	29.261	0.30559	0.18139	0.2142	0.58401	0.37105	0.73355	0.5642	0.15405	0.13439
chr2:161265056-161265556_1	2	161264956	161265456	enh_prom	RBMS1	cg03157115;cg18852574;cg19506623;cg02696675	0.258558	0.726463	0.384205	0.0315393	0.382839	28.6992	19.9729	negative	-0.967101	0.935285	2.059e-05	0.0529533	28.6624	26.1266	28.2648	20.8549	28.1457	16.3512	14.5397	31.181	29.261	0.289612	0.288172	0.329298	0.75153	0.400193	0.89896	0.855167	0.143843	0.241865
chr2:161290449-161290449_1	2	161290199	161290699	enhancer	RBMS1	cg23489137	0.253666	0.6739	0.341064	0.0333387	0.386203	28.6992	19.9729	negative	-0.944314	0.891729	0.00012703	0.101025	28.6624	26.1266	28.2648	20.8549	28.1457	16.3512	14.5397	31.181	29.261	0.34527	0.29841	0.23067	0.59923	0.43006	0.80367	0.86264	0.26892	0.12506
chr3:29471980-29471980_1	3	29471730	29472230	enhancer	RBMS3	cg11863854	0.67888	0.286225	-0.344958	0.00911448	0.309416	6.08988	9.04503	negative	-0.898376	0.807079	0.00099613	0.20301	6.29453	7.09535	5.80105	9.75232	6.45245	10.8642	9.11116	5.7176	5.54089	0.66545	0.72883	0.6581	0.17531	0.44971	0.13328	0.3866	0.72235	0.61967
chr3:29507737-29507737_1	3	29507487	29507987	enhancer	RBMS3	cg16565002	0.627702	0.459147	-0.166282	0.00416201	0.251822	6.08988	9.04503	negative	-0.947677	0.898092	0.00010249	0.0903893	6.29453	7.09535	5.80105	9.75232	6.45245	10.8642	9.11116	5.7176	5.54089	0.63919	0.56	0.61722	0.45704	0.54689	0.34391	0.48875	0.69252	0.62958
chr1:163172649-163173262_2	1	163172949	163173449	enhancer	RGS5	cg24901474;cg02579477	0.792573	0.44138	-0.316074	0.0110654	0.319962	0.260334	35.2278	negative	-0.938694	0.881146	0.00017686	0.114906	0.317922	0.286106	0.251011	36.1491	21.4321	63.0256	20.3045	0.178839	0.267791	0.822705	0.79194	0.760015	0.29318	0.609685	0.313365	0.54929	0.791115	0.79709
chr1:163172649-163173262_1	1	163172549	163173049	enhancer	RGS5	cg24901474;cg00250483;cg10604646	0.801329	0.550174	-0.225809	0.0124189	0.328345	0.260334	35.2278	negative	-0.943593	0.890368	0.00013278	0.101202	0.317922	0.286106	0.251011	36.1491	21.4321	63.0256	20.3045	0.178839	0.267791	0.820693	0.794837	0.79397	0.447323	0.68027	0.450533	0.62257	0.78989	0.807257
chr14:21269744-21271355_3	14	21270444	21270944	enhancer	RNASE1	cg08122234;cg05153345;cg05958352	0.779523	0.501893	-0.217797	0.0410433	0.398551	0.0118958	4.06937	negative	-0.932457	0.869477	0.00024671	0.133549	0	0	0.059479	5.45559	0.289486	4.3508	6.18162	0	0	0.699453	0.767277	0.80695	0.507437	0.659357	0.457217	0.383563	0.768337	0.855597
chr14:21269883-21270544_2	14	21270183	21270683	enh_prom	RNASE1	cg05153345;cg13787135	0.556445	0.316055	-0.18075	0.0434717	0.402874	0.0118958	4.06937	negative	-0.855744	0.732298	0.00325063	0.30485	0	0	0.059479	5.45559	0.289486	4.3508	6.18162	0	0	0.525515	0.51243	0.575255	0.33825	0.355095	0.33231	0.238565	0.568185	0.60084
chr14:21270749-21271344_1	14	21270649	21271149	enh_prom	RNASE1	cg08122234;cg18836485;cg12940993;cg05958352	0.622869	0.336008	-0.228723	0.0410668	0.398624	0.0118958	4.06937	negative	-0.943946	0.891034	0.00012994	0.101202	0	0	0.059479	5.45559	0.289486	4.3508	6.18162	0	0	0.545292	0.633513	0.661133	0.319823	0.533425	0.244045	0.246737	0.601457	0.67295
chr15:75247986-75248486_2	15	75248286	75248786	enh_prom	RPP25	cg09784307;cg15611336	0.352478	0.104704	-0.196189	0.0211914	0.364384	3.32852	9.77868	negative	-0.865073	0.748351	0.00259715	0.280391	2.12145	0.603865	4.03644	9.31588	9.2663	13.3152	7.21735	5.97493	3.90593	0.419035	0.324845	0.35731	0.172595	0.116745	0.0491	0.080375	0.32025	0.34095
chr15:75247986-75248486_1	15	75247886	75248386	enh_prom	RPP25	cg27542341	0.984266	0.430488	-0.448174	0.038365	0.393467	3.32852	9.77868	negative	-0.841709	0.708474	0.00443439	0.339933	2.12145	0.603865	4.03644	9.31588	9.2663	13.3152	7.21735	5.97493	3.90593	0.98199	0.98112	0.98101	0.51927	0.74187	0.1152	0.34561	0.98302	0.99419
chr17:78936292-78936372_1	17	78936082	78936582	enhancer	RPTOR	cg17408291;cg09361653	0.627683	0.744245	0.103429	0.0187339	0.358389	8.92508	7.47509	negative	-0.855496	0.731873	0.00326943	0.305427	8.73476	8.31727	9.08173	7.19985	7.84213	7.30654	7.55183	9.26639	9.22526	0.667215	0.657185	0.575235	0.71299	0.67968	0.83243	0.75188	0.615545	0.623235
chr17:78934982-78935529_1	17	78934882	78935382	enh_ins	RPTOR	cg09491897;cg17906851;cg21879029	0.730077	0.895837	0.144083	0.00276596	0.221264	8.92508	7.47509	negative	-0.881892	0.777734	0.00165791	0.237208	8.73476	8.31727	9.08173	7.19985	7.84213	7.30654	7.55183	9.26639	9.22526	0.789345	0.73103	0.66392	0.88541	0.89204	0.94546	0.86044	0.70958	0.75651
chr17:78808060-78808570_2	17	78808360	78808860	enhancer	RPTOR	cg19122260;cg07530194	0.257456	0.533625	0.260001	0.00606578	0.278933	8.92508	7.47509	negative	-0.942624	0.888539	0.00014081	0.103615	8.73476	8.31727	9.08173	7.19985	7.84213	7.30654	7.55183	9.26639	9.22526	0.25318	0.394925	0.25343	0.62453	0.330025	0.59815	0.581795	0.1565	0.229245
chr17:78779140-78779140_1	17	78778890	78779390	enhancer	RPTOR	cg01516792	0.666948	0.91693	0.250544	1.321e-05	0.0368272	8.92508	7.47509	negative	-0.910904	0.829745	0.00063652	0.176378	8.73476	8.31727	9.08173	7.19985	7.84213	7.30654	7.55183	9.26639	9.22526	0.6517	0.69201	0.64431	0.9136	0.93054	0.92113	0.90245	0.70695	0.63977
chr17:78623601-78623601_1	17	78623351	78623851	enhancer	RPTOR	cg18758433	0.100214	0.51712	0.348912	0.0157408	0.347831	8.92508	7.47509	negative	-0.925269	0.856123	0.00034899	0.146847	8.73476	8.31727	9.08173	7.19985	7.84213	7.30654	7.55183	9.26639	9.22526	0.16897	0.08833	0.09417	0.63607	0.30397	0.5408	0.58764	0.08756	0.06204
chr17:78753756-78754372_1	17	78753656	78754156	enhancer	RPTOR	cg22386583;cg05651511;cg15230985;cg12654199	0.145181	0.639938	0.399241	0.0337543	0.386676	8.92508	7.47509	negative	-0.922182	0.85042	0.00040086	0.150491	8.73476	8.31727	9.08173	7.19985	7.84213	7.30654	7.55183	9.26639	9.22526	0.204055	0.186793	0.146308	0.663855	0.342955	0.864733	0.68821	0.09032	0.09843
chr8:93107598-93108098_2	8	93107898	93108398	enh_prom	RUNX1T1	cg11043251;cg24476103	0.178933	0.291635	0.122475	0.00172391	0.190733	1.33343	0.660405	negative	-0.836229	0.699279	0.00496721	0.353585	1.46964	1.51071	0.905687	0.617202	0.663358	0.477308	0.883753	1.65026	1.13087	0.185795	0.19844	0.19525	0.334665	0.30228	0.30047	0.229125	0.156525	0.158655
chr8:93076082-93076177_1	8	93075880	93076380	enhancer	RUNX1T1	cg00045118;cg07120544	0.568768	0.799358	0.234283	1.419e-05	0.0373167	1.33343	0.660405	negative	-0.880872	0.775936	0.0017068	0.240663	1.46964	1.51071	0.905687	0.617202	0.663358	0.477308	0.883753	1.65026	1.13087	0.577045	0.575865	0.587545	0.74675	0.836795	0.822705	0.79118	0.497255	0.60613
chr8:93062790-93062790_1	8	93062540	93063040	enhancer	RUNX1T1	cg02411529	0.587848	0.9121	0.30778	0.00077787	0.146893	1.33343	0.660405	negative	-0.934829	0.873905	0.00021821	0.128861	1.46964	1.51071	0.905687	0.617202	0.663358	0.477308	0.883753	1.65026	1.13087	0.60222	0.56895	0.68315	0.89858	0.90694	0.92744	0.91544	0.44089	0.64403
chr6:45406867-45406867_1	6	45406617	45407117	enhancer	RUNX2	cg05217983	0.057532	0.39637	0.277426	0.0420612	0.399954	5.15932	2.9145	negative	-0.840453	0.706361	0.00455291	0.342448	6.6684	3.41005	5.18504	3.71627	2.83042	1.2107	3.90062	5.51866	5.01447	0.07517	0.06699	0.06982	0.22574	0.37658	0.6583	0.32486	0.06031	0.01537
chr9:137258920-137258920_1	9	137258670	137259170	enhancer	RXRA	cg13786567	0.467198	0.674643	0.170958	0.0367545	0.3913	10.1372	7.70896	negative	-0.889619	0.791422	0.00131861	0.2196	9.3414	9.37914	10.8934	5.8839	9.03305	9.51287	6.40603	10.9495	10.1226	0.50094	0.54581	0.44385	0.77932	0.51593	0.68354	0.71978	0.38765	0.45774
chr1:153517804-153518454_1	1	153517704	153518204	enh_prom	S100A4	cg26894575	0.068362	0.299225	0.199514	0.0122851	0.32749	541.077	56.095	negative	-0.887807	0.788201	0.00139339	0.222962	477.433	304.858	667.026	37.9269	160.776	6.28968	19.3873	666.2	589.867	0.06552	0.07011	0.05782	0.3062	0.18099	0.31693	0.39278	0.08061	0.06775
chr1:153517804-153518454_2	1	153518104	153518604	enh_prom	S100A4	cg24691453;cg13091627;cg18273417	0.239081	0.729002	0.400047	0.0274541	0.375145	541.077	56.095	negative	-0.919755	0.84595	0.00044526	0.15691	477.433	304.858	667.026	37.9269	160.776	6.28968	19.3873	666.2	589.867	0.214577	0.33824	0.241607	0.77483	0.426997	0.8803	0.833883	0.200757	0.200223
chr1:153517265-153517384_1	1	153517074	153517574	enhancer	S100A4	cg23048494;cg01411912	0.410119	0.684744	0.23841	0.00915529	0.30979	541.077	56.095	negative	-0.912688	0.832999	0.00059408	0.173709	477.433	304.858	667.026	37.9269	160.776	6.28968	19.3873	666.2	589.867	0.424755	0.42833	0.39989	0.623975	0.5855	0.769025	0.760475	0.40494	0.39268
chr6:134491087-134491587_2	6	134491387	134491887	enh_prom	SGK1	cg17284168;cg18566177;cg21366688	0.837145	0.342048	-0.399099	0.0388629	0.394267	40.7253	175.9	negative	-0.96685	0.934799	2.114e-05	0.0529533	70.6518	17.1333	27.9585	147.999	89.7247	260.786	205.091	38.7884	49.0945	0.870713	0.86705	0.78881	0.504347	0.578917	0.0945567	0.19037	0.811613	0.847537
chr6:134493074-134493574_1	6	134492974	134493474	enh_prom	SGK1	ch.6.2574971F;cg21676440	0.917918	0.438208	-0.394792	0.0349877	0.388811	40.7253	175.9	negative	-0.977558	0.955619	5.455e-06	0.0342577	70.6518	17.1333	27.9585	147.999	89.7247	260.786	205.091	38.7884	49.0945	0.90279	0.91415	0.91276	0.51748	0.74224	0.22167	0.27144	0.91902	0.94087
chr6:134497384-134498069_2	6	134497684	134498184	enh_prom	SGK1	cg08239804	0.497782	0.25129	-0.222074	0.0122119	0.327019	40.7253	175.9	negative	-0.889934	0.791983	0.00130588	0.2196	70.6518	17.1333	27.9585	147.999	89.7247	260.786	205.091	38.7884	49.0945	0.46946	0.47128	0.49512	0.22514	0.41621	0.24087	0.12294	0.51793	0.53512
chr6:134494370-134494870_1	6	134494270	134494770	enh_prom	SGK1	cg08640361	0.69934	0.2143	-0.4188	0.00650903	0.282494	40.7253	175.9	negative	-0.926367	0.858155	0.00033173	0.145517	70.6518	17.1333	27.9585	147.999	89.7247	260.786	205.091	38.7884	49.0945	0.7019	0.68204	0.64442	0.2016	0.40512	0.12079	0.12969	0.74711	0.72123
chr6:134491087-134491587_1	6	134490987	134491487	enh_prom	SGK1	cg21078322;cg05183646	0.82872	0.318443	-0.400535	0.0485261	0.411766	40.7253	175.9	negative	-0.964487	0.930235	2.684e-05	0.0557384	70.6518	17.1333	27.9585	147.999	89.7247	260.786	205.091	38.7884	49.0945	0.85127	0.829425	0.795655	0.40456	0.61519	0.12785	0.12617	0.86501	0.80224
chr4:2813358-2813858_1	4	2813258	2813758	enh_prom	SH3BP2	cg03443467;cg10322254;cg05336051	0.370975	0.503962	0.131605	0.010908	0.319323	6.85998	4.03707	negative	-0.864756	0.747803	0.00261769	0.280391	6.70752	7.22769	5.33361	4.6931	4.51186	2.82895	4.11435	8.14809	6.88297	0.346323	0.336507	0.43867	0.535177	0.484013	0.59085	0.40581	0.311017	0.422357
chr14:72154514-72154514_1	14	72154264	72154764	enhancer	SIPA1L1	cg07139449	0.899332	0.618487	-0.272506	0.00703908	0.288986	4.24478	20.59	negative	-0.945183	0.893371	0.00012033	0.0975119	3.0873	3.46945	4.15343	24.8303	9.67784	27.477	20.3749	5.17556	5.33817	0.90442	0.92233	0.87799	0.67566	0.78327	0.46973	0.54529	0.89442	0.8975
chr12:51403056-51403056_1	12	51402806	51403306	enhancer	SLC11A2	cg14688905	0.847586	0.60355	-0.207416	0.0326982	0.385023	10.0795	16.2607	negative	-0.92292	0.851782	0.000388	0.150382	9.97737	9.29754	10.5566	16.149	12.755	17.4671	18.6718	10.4854	10.0804	0.79211	0.87296	0.85655	0.65395	0.76654	0.42809	0.56562	0.81427	0.90204
chr6:3324467-3324467_1	6	3324217	3324717	enhancer	SLC22A23	cg16887070	0.867056	0.529883	-0.320978	0.00081157	0.148612	0.427593	7.99599	negative	-0.854242	0.72973	0.00336546	0.308377	0.625561	0.127336	0.419962	7.77866	4.26754	9.92525	10.0125	0.292651	0.672454	0.80583	0.8864	0.86677	0.54221	0.51462	0.65759	0.40511	0.86547	0.91081
chr20:62373083-62373583_1	20	62372983	62373483	enh_prom	SLC2A4RG	cg08258867	0.62905	0.806327	0.17173	0.00100928	0.159193	26.4037	18.5827	negative	-0.912494	0.832646	0.00059859	0.17435	24.0708	20.657	28.2731	19.2946	18.3706	21.882	14.7834	31.5862	27.4315	0.64722	0.69732	0.61588	0.78208	0.82237	0.80837	0.81249	0.5511	0.63373
chr2:40622490-40622490_1	2	40622240	40622740	enhancer	SLC8A1	cg00415424	0.072528	0.405027	0.288536	0.0141415	0.339503	21.2673	3.36127	negative	-0.841509	0.708138	0.0044531	0.340463	20.3562	19.5557	13.2199	3.60054	4.51556	0.795956	4.53301	26.2176	26.987	0.06575	0.04493	0.08423	0.36059	0.22467	0.55667	0.47818	0.12325	0.04448
chr2:40508306-40508306_1	2	40508056	40508556	enhancer	SLC8A1	cg00870449	0.094286	0.550745	0.3616	0.0311792	0.382271	21.2673	3.36127	negative	-0.91432	0.835981	0.00055702	0.170651	20.3562	19.5557	13.2199	3.60054	4.51556	0.795956	4.53301	26.2176	26.987	0.06811	0.1064	0.15048	0.58535	0.36252	0.73509	0.52002	0.09888	0.04756
chr16:2082989-2083643_1	16	2082889	2083389	enh_prom	SLC9A3R2	cg05251269;cg07405121	0.058974	0.325062	0.218091	0.0319306	0.383232	52.182	18.8553	negative	-0.855346	0.731617	0.00328081	0.305732	39.3059	32.3996	66.8107	12.1386	36.1833	11.5771	15.5221	67.5352	54.8588	0.06638	0.065415	0.06188	0.446115	0.158065	0.377045	0.319025	0.05582	0.045375
chr16:2086235-2086846_1	16	2086135	2086635	enhancer	SLC9A3R2	cg02668822;cg15909006;cg03158310	0.476106	0.629023	0.123695	0.0195193	0.360935	52.182	18.8553	negative	-0.837764	0.701848	0.00481382	0.34984	39.3059	32.3996	66.8107	12.1386	36.1833	11.5771	15.5221	67.5352	54.8588	0.49462	0.487627	0.452387	0.614597	0.617153	0.69099	0.59335	0.472737	0.47316
chr16:2088960-2088997_1	16	2088728	2089228	enhancer	SLC9A3R2	cg01346158;cg05194102	0.230146	0.708749	0.445879	6.854e-05	0.0587375	52.182	18.8553	negative	-0.911322	0.830507	0.00062639	0.176378	39.3059	32.3996	66.8107	12.1386	36.1833	11.5771	15.5221	67.5352	54.8588	0.28576	0.37478	0.1794	0.71772	0.636615	0.704595	0.776065	0.170045	0.140745
chr16:2083143-2083889_3	16	2083843	2084343	enh_prom	SLC9A3R2	cg04751761	0.052198	0.371995	0.266508	0.0224891	0.365685	52.182	18.8553	negative	-0.851166	0.724484	0.00360926	0.315996	39.3059	32.3996	66.8107	12.1386	36.1833	11.5771	15.5221	67.5352	54.8588	0.0595	0.04924	0.06159	0.41345	0.17897	0.48023	0.41533	0.05691	0.03375
chr16:2082689-2083393_1	16	2082589	2083089	enhancer	SLC9A3R2	cg09889479;cg09462956	0.077432	0.354076	0.229471	0.0230772	0.367374	52.182	18.8553	negative	-0.865465	0.749029	0.00257187	0.279151	39.3059	32.3996	66.8107	12.1386	36.1833	11.5771	15.5221	67.5352	54.8588	0.08344	0.086425	0.08621	0.432935	0.19277	0.42994	0.36066	0.070825	0.06026
chr16:2084545-2085045_1	16	2084445	2084945	enh_prom	SLC9A3R2	cg08074555	0.047944	0.637315	0.485742	0.0235655	0.368349	52.182	18.8553	negative	-0.854667	0.730456	0.00333271	0.307099	39.3059	32.3996	66.8107	12.1386	36.1833	11.5771	15.5221	67.5352	54.8588	0.04502	0.05548	0.05735	0.71152	0.30457	0.83191	0.70126	0.05688	0.02499
chr22:31498863-31498863_1	22	31498613	31499113	enhancer	SMTN	cg27601574	0.081018	0.495965	0.338	0.0290966	0.378282	55.5557	21.3116	negative	-0.899684	0.809431	0.00095324	0.200116	43.3679	54.3932	69.3819	22.755	33.2847	11.4116	17.7949	57.7046	52.9308	0.07756	0.11699	0.08442	0.64321	0.25085	0.58265	0.50715	0.06767	0.05845
chr22:31479311-31479811_1	22	31479211	31479711	enh_prom	SMTN	cg00341732	0.373992	0.656755	0.244482	0.0135187	0.336268	55.5557	21.3116	negative	-0.926188	0.857824	0.0003345	0.145721	43.3679	54.3932	69.3819	22.755	33.2847	11.4116	17.7949	57.7046	52.9308	0.37273	0.40885	0.3604	0.63207	0.50072	0.7444	0.74983	0.3864	0.34158
chr5:121686873-121686873_1	5	121686623	121687123	enhancer	SNCAIP	cg07289841	0.426712	0.706152	0.223122	0.0184772	0.358236	5.11821	1.43278	negative	-0.854668	0.730457	0.00333267	0.307099	3.94028	4.37641	4.56766	2.08254	0.733496	2.13764	0.777425	9.12257	3.58413	0.3748	0.4754	0.52069	0.75398	0.64295	0.66951	0.75817	0.29586	0.46681
chr5:53814925-53815425_2	5	53815225	53815725	enh_prom	SNX18	cg16358034	0.964428	0.749263	-0.172696	0.0438899	0.403929	13.8608	21.7828	negative	-0.870118	0.757105	0.00228459	0.264719	11.5312	17.0545	10.9621	11.4601	19.6566	26.5165	29.498	14.521	15.2352	0.96463	0.96273	0.9591	0.84145	0.84063	0.68084	0.63413	0.95714	0.97854
chr5:53814925-53815425_1	5	53814825	53815325	enh_prom	SNX18	cg16358034;cg21995347	0.915447	0.69595	-0.176645	0.0443284	0.404657	13.8608	21.7828	negative	-0.874693	0.765088	0.0020245	0.254561	11.5312	17.0545	10.9621	11.4601	19.6566	26.5165	29.498	14.521	15.2352	0.916255	0.91666	0.92217	0.81145	0.76958	0.57453	0.62824	0.895345	0.926805
chr2:54816818-54816818_1	2	54816568	54817068	enhancer	SPTBN1	cg02794358	0.852294	0.3223	-0.4271	0.0315282	0.382839	31.7325	66.5905	negative	-0.863159	0.745043	0.00272306	0.285388	33.9045	27.2294	29.3807	85.7164	59.2565	62.8551	58.5342	33.3222	34.8257	0.86115	0.68948	0.90741	0.17113	0.65992	0.24721	0.21094	0.87837	0.92506
chr2:54846562-54846562_1	2	54846312	54846812	enhancer	SPTBN1	cg23092956	0.816212	0.445483	-0.32743	0.00359674	0.241696	31.7325	66.5905	negative	-0.920117	0.846615	0.00043844	0.155865	33.9045	27.2294	29.3807	85.7164	59.2565	62.8551	58.5342	33.3222	34.8257	0.83358	0.75824	0.83821	0.36085	0.58556	0.36564	0.46988	0.77829	0.87274
chr2:54751507-54751507_1	2	54751257	54751757	enhancer	SPTBN1	cg24544082	0.763048	0.410013	-0.309796	0.00653716	0.282785	31.7325	66.5905	negative	-0.899484	0.809072	0.0009597	0.200667	33.9045	27.2294	29.3807	85.7164	59.2565	62.8551	58.5342	33.3222	34.8257	0.63422	0.78584	0.79782	0.32574	0.50717	0.26796	0.53918	0.7677	0.82966
chr2:54697181-54697181_1	2	54696931	54697431	enhancer	SPTBN1	cg16667251	0.74415	0.240415	-0.452982	0.00194856	0.197803	31.7325	66.5905	negative	-0.83835	0.702831	0.00475604	0.347466	33.9045	27.2294	29.3807	85.7164	59.2565	62.8551	58.5342	33.3222	34.8257	0.6839	0.79305	0.80537	0.30199	0.40721	0.13638	0.11608	0.65757	0.78086
chr7:89839615-89840115_1	7	89839515	89840015	enh_prom	STEAP2	cg26904169	0.896888	0.692385	-0.163812	0.0453631	0.40653	1.06531	2.6888	negative	-0.909202	0.826649	0.00067893	0.180799	1.47062	0.665729	1.93347	2.62613	1.47997	4.03051	2.61859	0.270885	0.98587	0.89638	0.89008	0.89793	0.66418	0.81948	0.57135	0.71453	0.90935	0.8907
chr4:5116565-5116565_1	4	5116315	5116815	enhancer	STK32B	cg10593165	0.140066	0.345655	0.179182	0.0172304	0.353319	9.35815	3.35834	negative	-0.90583	0.820527	0.00076876	0.187702	12.0544	9.55711	10.6074	1.62046	10.2035	0.787696	0.821687	6.45892	8.11291	0.16407	0.15068	0.11589	0.3987	0.19214	0.39793	0.39385	0.17067	0.09902
chr4:184827504-184828215_3	4	184828204	184828704	enh_prom	STOX2	cg23965931	0.446942	0.17569	-0.230598	0.0178341	0.355297	0.0103447	1.33308	negative	-0.864836	0.747942	0.00261249	0.280391	0.00869178	0.0256284	0	0.779666	0.646383	2.10969	1.7966	0	0.0174032	0.34381	0.49928	0.50155	0.16674	0.34182	0.0821	0.1121	0.33001	0.56006
chr10:29923636-29924136_1	10	29923536	29924036	enh_prom	SVIL	cg04678141;cg00049475	0.658025	0.415922	-0.252701	0.00023016	0.0937431	1.63803	10.6112	negative	-0.873721	0.763388	0.00207798	0.256404	1.86415	3.06488	1.13499	9.31495	5.07688	12.781	15.2718	1.50306	0.623074	0.719075	0.63085	0.65783	0.503835	0.405075	0.426455	0.328325	0.61325	0.66912
chr5:150018914-150019603_2	5	150019214	150019714	enhancer	SYNPO	cg12172720;cg13590277	0.465917	0.230971	-0.19348	0.0458519	0.407339	5.03963	57.2112	negative	-0.914754	0.836775	0.00054744	0.168646	7.67358	5.13826	2.86949	39.8468	24.5142	67.8407	96.6433	5.69372	3.82312	0.445325	0.44112	0.50495	0.22255	0.427815	0.104195	0.169325	0.45269	0.4855
chr8:38697076-38697076_1	8	38696826	38697326	enhancer	TACC1	cg22991992	0.132782	0.793643	0.54845	0.0111111	0.320291	46.1793	18.1707	negative	-0.959374	0.920398	4.276e-05	0.0682093	49.9308	38.2638	51.5592	18.4137	27.5384	12.1741	14.5567	44.3744	46.7682	0.12065	0.12488	0.17828	0.85388	0.59799	0.9294	0.7933	0.17021	0.06989
chr8:38627639-38628247_2	8	38627939	38628439	enh_prom_ins	TACC1	cg15299510	0.061996	0.255695	0.162362	0.0356591	0.389832	46.1793	18.1707	negative	-0.884127	0.781681	0.00155418	0.23229	49.9308	38.2638	51.5592	18.4137	27.5384	12.1741	14.5567	44.3744	46.7682	0.06072	0.06569	0.07999	0.20834	0.17296	0.4154	0.22608	0.06871	0.03487
chr17:59474869-59479306_10	17	59478369	59478869	promoter	TBX2	cg04245057;cg11631427	0.065888	0.216029	0.125411	0.0365163	0.39104	7.53352	1.86931	negative	-0.846549	0.716644	0.00399761	0.328558	6.40121	4.19306	8.54871	1.15293	4.58504	0.207255	1.53202	11.3101	7.21451	0.06807	0.087925	0.07164	0.21041	0.114075	0.321675	0.217955	0.06591	0.035895
chr12:115109352-115109852_2	12	115109652	115110152	enh_prom	TBX3	cg00347620	0.087186	0.725605	0.5504	0.00981983	0.313571	29.005	9.65236	negative	-0.846908	0.717253	0.00396642	0.328143	28.1897	24.8397	31.0109	15.4745	6.52602	7.22089	9.38804	35.8759	25.1089	0.10199	0.0989	0.09415	0.74837	0.44567	0.95323	0.75515	0.09499	0.0459
chr12:115115415-115115415_1	12	115115165	115115665	enhancer	TBX3	cg00517511	0.158238	0.765885	0.502974	0.0167567	0.350817	29.005	9.65236	negative	-0.843579	0.711626	0.00426193	0.334413	28.1897	24.8397	31.0109	15.4745	6.52602	7.22089	9.38804	35.8759	25.1089	0.26891	0.15551	0.15181	0.8121	0.46867	0.92065	0.86212	0.09428	0.12068
chr11:12701699-12702199_1	11	12701599	12702099	enh_prom	TEAD1	cg23352146;cg14381919	0.089936	0.274657	0.144768	0.046413	0.408311	56.222	37.8198	negative	-0.890373	0.792763	0.00128835	0.2196	62.0161	41.789	57.8306	34.3244	45.2792	40.0257	31.6498	57.288	62.1865	0.106295	0.114125	0.089335	0.299745	0.162645	0.27536	0.36088	0.077235	0.06269
chr4:38807259-38807382_1	4	38807070	38807570	enhancer	TLR1	cg22839308;cg09316306;cg08757862	0.725754	0.277687	-0.413641	0.00883359	0.306733	0.187437	2.40151	negative	-0.891202	0.79424	0.00125562	0.217044	0.146349	0.386471	0.170798	3.19834	0.824317	3.01767	2.56572	0.102382	0.131183	0.612393	0.74213	0.763023	0.39736	0.53065	0.09178	0.0909567	0.7385	0.772723
chr13:114149823-114150323_1	13	114149723	114150223	enh_prom	TMCO3	cg14534144;cg23167246;cg22923006	0.107839	0.325267	0.244097	0.00607796	0.278967	62.8904	49.4663	negative	-0.853373	0.728246	0.00343315	0.310789	65.3354	59.5414	66.8903	52.9803	59.7584	44.1863	40.9404	62.2709	60.414	0.0963667	0.110593	0.117053	0.351733	0.19899	0.442893	0.30745	0.13193	0.08325
chr17:7452289-7453377_3	17	7452989	7453489	enhancer	TNFSF12	cg00031162	0.485134	0.7167	0.203232	0.00378922	0.244823	17.4717	11.1243	negative	-0.882022	0.777963	0.00165174	0.236775	19.5383	19.6162	13.9271	10.5608	12.9191	10.0053	11.0119	16.352	17.9247	0.52582	0.44765	0.50053	0.74163	0.6236	0.73427	0.7673	0.46931	0.48236
chr7:47578852-47579360_2	7	47579152	47579652	enh_prom	TNS3	cg04089246;cg25835019	0.084822	0.425538	0.273232	0.0279946	0.376512	43.1655	23.6236	negative	-0.872247	0.760815	0.00216086	0.259524	48.3445	39.093	37.8022	22.7007	45.7989	11.5795	14.4153	46.3056	44.282	0.09338	0.063535	0.06794	0.494505	0.23878	0.491525	0.47734	0.161215	0.03804
chr6:42224838-42224838_1	6	42224588	42225088	enhancer	TRERF1	cg21669966	0.243882	0.649813	0.34515	0.00570256	0.274542	5.32082	3.12848	negative	-0.951441	0.90524	7.921e-05	0.0789955	5.99794	5.52033	5.10548	3.26116	2.98149	3.66822	2.60307	5.0141	4.96624	0.21141	0.21519	0.32293	0.73479	0.66633	0.53455	0.66358	0.22543	0.24445
chr6:42264793-42264793_1	6	42264543	42265043	enhancer	TRERF1	cg05917713	0.429268	0.873043	0.448972	1.506e-07	0.0103523	5.32082	3.12848	negative	-0.931896	0.86843	0.00025382	0.134479	5.99794	5.52033	5.10548	3.26116	2.98149	3.66822	2.60307	5.0141	4.96624	0.44395	0.35639	0.44592	0.85628	0.84145	0.91361	0.88083	0.43913	0.46095
chr5:14154788-14154788_1	5	14154538	14155038	enhancer	TRIO	cg10603290	0.169324	0.732895	0.439032	0.0448172	0.405458	50.889	36.3808	negative	-0.839709	0.705112	0.00462403	0.344787	49.5392	48.9551	51.68	38.5896	35.8941	29.0704	41.969	49.533	54.7378	0.19838	0.21014	0.17441	0.75719	0.40297	0.90912	0.8623	0.15844	0.10525
chr5:14464064-14464064_1	5	14463814	14464314	enhancer	TRIO	cg15612947	0.130712	0.519413	0.32315	0.0225417	0.365842	50.889	36.3808	negative	-0.845942	0.715618	0.00405063	0.33021	49.5392	48.9551	51.68	38.5896	35.8941	29.0704	41.969	49.533	54.7378	0.17436	0.12575	0.12566	0.51672	0.29312	0.65795	0.60986	0.1439	0.08389
chr5:14450568-14450568_1	5	14450318	14450818	enhancer	TRIO	cg09828761	0.275382	0.798338	0.429726	0.0107226	0.318759	50.889	36.3808	negative	-0.903874	0.816987	0.00082449	0.190732	49.5392	48.9551	51.68	38.5896	35.8941	29.0704	41.969	49.533	54.7378	0.28424	0.38169	0.27058	0.87504	0.66377	0.86681	0.78773	0.23381	0.20659
chr5:14210840-14210840_1	5	14210590	14211090	enhancer	TRIO	cg16396309	0.151352	0.614325	0.413784	0.00105147	0.161586	50.889	36.3808	negative	-0.939064	0.88184	0.00017322	0.113766	49.5392	48.9551	51.68	38.5896	35.8941	29.0704	41.969	49.533	54.7378	0.19657	0.20029	0.14366	0.66959	0.57274	0.68651	0.52846	0.1019	0.11434
chr5:14449498-14449498_1	5	14449248	14449748	enhancer	TRIO	cg02705758	0.067192	0.548283	0.395772	0.0236258	0.368563	50.889	36.3808	negative	-0.884129	0.781683	0.00155413	0.23229	49.5392	48.9551	51.68	38.5896	35.8941	29.0704	41.969	49.533	54.7378	0.08516	0.07081	0.07324	0.63365	0.29868	0.73008	0.53072	0.06482	0.04193
chr5:14452105-14452155_1	5	14451880	14452380	enhancer	TRIO	cg12294026;cg25585967	0.271095	0.635719	0.385219	0.00106291	0.162187	50.889	36.3808	negative	-0.935693	0.875521	0.00020844	0.127362	49.5392	48.9551	51.68	38.5896	35.8941	29.0704	41.969	49.533	54.7378	0.290265	0.30366	0.26588	0.6547	0.75437	0.663865	0.46994	0.271885	0.223785
chr2:239791753-239791753_1	2	239791503	239792003	enhancer	TWIST2	cg14755699	0.141614	0.640057	0.417312	0.0352303	0.389085	30.6374	18.0086	negative	-0.855856	0.732489	0.00324223	0.30485	30.0895	27.6724	29.7036	5.44314	50.0763	7.7812	8.73382	33.7821	31.9392	0.17061	0.19558	0.14492	0.76817	0.22931	0.73302	0.82973	0.10596	0.091
chr11:122679695-122679695_1	11	122679445	122679945	enhancer	UBASH3B	cg20595198	0.13138	0.57069	0.35624	0.0331279	0.385652	15.4105	5.67273	negative	-0.892082	0.79581	0.00122152	0.215347	18.1116	14.4094	18.5236	5.60511	8.4049	2.22623	6.45468	13.1123	12.8957	0.14316	0.137	0.15022	0.72137	0.3196	0.72413	0.51766	0.12278	0.10374
chr11:122662714-122662714_1	11	122662464	122662964	enhancer	UBASH3B	cg25943661	0.099704	0.459103	0.29186	0.0302036	0.380531	15.4105	5.67273	negative	-0.872231	0.760787	0.00216176	0.259524	18.1116	14.4094	18.5236	5.60511	8.4049	2.22623	6.45468	13.1123	12.8957	0.09454	0.12531	0.12237	0.38167	0.28432	0.57918	0.59124	0.09527	0.06103
chr7:129516344-129516344_1	7	129516094	129516594	enhancer	UBE2H	cg22145318	0.906776	0.651223	-0.205352	0.0479115	0.410849	39.9421	61.0832	negative	-0.867205	0.752045	0.00246164	0.27536	38.7346	56.8031	34.5673	69.1599	47.2906	71.9389	55.9433	30.2099	39.3954	0.92454	0.88388	0.88143	0.6218	0.84546	0.52042	0.61721	0.92555	0.91848
chr1:1207539-1208039_1	1	1207439	1207939	enh_prom	UBE2J2	cg23891364	0.460356	0.62723	0.159124	0.00598282	0.278526	26.8463	20.2728	negative	-0.856039	0.732803	0.00322842	0.304521	25.6826	23.2121	31.4054	20.5211	24.6981	16.423	19.449	27.3015	26.6298	0.47829	0.44742	0.44887	0.68113	0.51894	0.68734	0.62151	0.47533	0.45187
chr16:4426960-4427428_2	16	4427260	4427760	enhancer	VASN	cg26457890	0.156662	0.641223	0.407816	0.0120281	0.326068	81.5946	38.93	negative	-0.851226	0.724586	0.00360438	0.315879	59.7849	84.3705	67.5528	25.6437	49.02	37.4346	43.6216	102.789	93.4756	0.18933	0.19739	0.15417	0.67444	0.43272	0.66961	0.78812	0.15451	0.08791
chr3:11674707-11674707_1	3	11674457	11674957	enhancer	VGLL4	cg17553677	0.831558	0.447335	-0.337986	0.0179239	0.355545	13.7809	27.4351	negative	-0.855287	0.731516	0.00328529	0.305769	14.825	19.1205	9.50534	24.0316	23.9914	36.0761	25.6411	11.345	14.1087	0.84654	0.84302	0.77838	0.40274	0.72348	0.2645	0.39862	0.83009	0.85976
chr1:1369366-1369866_1	1	1369266	1369766	enh_prom	VWA1	cg17491622;cg21837069	0.370729	0.593535	0.194723	0.00300989	0.226535	3.42409	0.902209	negative	-0.873159	0.762406	0.00210932	0.256404	1.03324	3.04639	4.08704	1.01162	1.06405	0.512955	1.02021	4.42121	4.53258	0.41067	0.41125	0.36071	0.5699	0.534845	0.669065	0.60033	0.341445	0.32957
chr3:55511693-55511693_1	3	55511443	55511943	promoter	WNT5A	cg20741319	0.15714	0.743783	0.458438	0.0382712	0.3932	233.889	66.8472	negative	-0.912285	0.832265	0.00060348	0.174426	239.513	280.946	212.716	34.4434	211.536	2.81353	18.5959	193.377	242.893	0.38206	0.15119	0.0978	0.8359	0.40951	0.87517	0.85455	0.08156	0.07309
chr3:55513523-55514023_1	3	55513423	55513923	enh_prom	WNT5A	cg02298472	0.058742	0.59625	0.430504	0.0423225	0.4005	233.889	66.8472	negative	-0.932151	0.868906	0.00025057	0.13404	239.513	280.946	212.716	34.4434	211.536	2.81353	18.5959	193.377	242.893	0.10145	0.05329	0.06952	0.47463	0.29431	0.86359	0.75247	0.05226	0.01719
chr3:55514171-55514671_1	3	55514071	55514571	enh_prom	WNT5A	cg22143766	0.09078	0.515755	0.337736	0.0451332	0.40602	233.889	66.8472	negative	-0.945767	0.894475	0.00011597	0.0950013	239.513	280.946	212.716	34.4434	211.536	2.81353	18.5959	193.377	242.893	0.1942	0.02725	0.05576	0.55072	0.24713	0.75881	0.50636	0.14079	0.0359
chr3:141150759-141151259_1	3	141150659	141151159	enh_prom	ZBTB38	cg13787933	0.133466	0.771253	0.521116	0.0191891	0.359797	32.2375	23.3003	negative	-0.859936	0.73949	0.0029445	0.293732	32.0297	33.8447	37.7143	24.0244	28.1092	21.9183	19.1493	26.1051	31.4938	0.27967	0.08461	0.08278	0.88331	0.45284	0.89182	0.85704	0.17515	0.04512
chr16:67433084-67433584_1	16	67432984	67433484	prom_ins	ZDHHC1	cg09451235;cg16219266;cg03821384	0.535931	0.312962	-0.19491	0.00701154	0.28849	2.02776	4.11896	negative	-0.900708	0.811275	0.00092056	0.19937	2.07313	2.84382	1.7016	2.82978	2.96841	5.35444	5.3232	1.56185	1.95838	0.463757	0.48435	0.556817	0.31471	0.43104	0.267937	0.23816	0.605883	0.56885
chr16:67432971-67433584_2	16	67433271	67433771	enh_prom_ins	ZDHHC1	cg08968184;cg09451235	0.522781	0.216584	-0.247744	0.0157324	0.347831	2.02776	4.11896	negative	-0.857999	0.736162	0.00308338	0.300195	2.07313	2.84382	1.7016	2.82978	2.96841	5.35444	5.3232	1.56185	1.95838	0.43475	0.48423	0.54627	0.196865	0.33162	0.163425	0.174425	0.604935	0.54372
chr16:67432971-67433584_1	16	67432871	67433371	enh_prom_ins	ZDHHC1	cg03821384;cg16219266	0.598089	0.403784	-0.173597	0.00582361	0.276578	2.02776	4.11896	negative	-0.895723	0.80232	0.00108724	0.2085	2.07313	2.84382	1.7016	2.82978	2.96841	5.35444	5.3232	1.56185	1.95838	0.54269	0.5417	0.609135	0.40943	0.505095	0.387195	0.313415	0.64914	0.64778
chr8:106626648-106627148_1	8	106626548	106627048	enh_prom	ZFPM2	cg20154222	0.846128	0.606757	-0.192384	0.0251186	0.37184	1.1022	11.2667	negative	-0.939865	0.883347	0.0001655	0.110627	0.569823	0.693313	1.88366	9.56692	2.85137	19.4706	13.1781	0.571573	1.79264	0.86208	0.84902	0.78961	0.62347	0.7146	0.5338	0.55516	0.86579	0.86414
chr8:106674239-106674239_1	8	106673989	106674489	enhancer	ZFPM2	cg00401433	0.891104	0.272313	-0.49611	0.0252126	0.372115	1.1022	11.2667	negative	-0.920759	0.847797	0.0004265	0.155174	0.569823	0.693313	1.88366	9.56692	2.85137	19.4706	13.1781	0.571573	1.79264	0.88737	0.84865	0.8931	0.20673	0.54748	0.09621	0.23883	0.85973	0.96667
chr8:106334083-106334583_1	8	106333983	106334483	enh_prom	ZFPM2	cg20988565	0.871882	0.439713	-0.34878	0.0372723	0.391993	1.1022	11.2667	negative	-0.849229	0.72119	0.00376885	0.321678	0.569823	0.693313	1.88366	9.56692	2.85137	19.4706	13.1781	0.571573	1.79264	0.83963	0.86269	0.88577	0.28772	0.72447	0.43782	0.30884	0.85795	0.91337
chr8:106604781-106605281_1	8	106604681	106605181	enh_prom	ZFPM2	cg10450897	0.65974	0.266933	-0.304406	0.047825	0.41062	1.1022	11.2667	negative	-0.960545	0.922646	3.865e-05	0.0640152	0.569823	0.693313	1.88366	9.56692	2.85137	19.4706	13.1781	0.571573	1.79264	0.75014	0.71744	0.58017	0.34138	0.46106	0.08193	0.18336	0.63882	0.61213
chr8:106520928-106520928_1	8	106520678	106521178	enhancer	ZFPM2	cg12797828	0.823552	0.331923	-0.40853	0.0122426	0.327081	1.1022	11.2667	negative	-0.899227	0.808609	0.00096807	0.200812	0.569823	0.693313	1.88366	9.56692	2.85137	19.4706	13.1781	0.571573	1.79264	0.803	0.81362	0.78603	0.27615	0.51459	0.22937	0.30758	0.82594	0.88917
chr10:81075012-81075492_1	10	81074912	81075412	enhancer	ZMIZ1	cg10313149;cg19666787;cg15733068;cg24752964	0.566992	0.675156	0.115809	0.00118655	0.169028	31.5114	19.8081	negative	-0.846322	0.716261	0.00401735	0.328836	26.5901	22.6225	33.5244	18.1331	15.0463	18.8599	27.1931	38.8564	35.9636	0.62377	0.594847	0.531667	0.67165	0.660273	0.697532	0.671168	0.544107	0.540567
chr18:74167981-74167981_1	18	74167731	74168231	enhancer	ZNF516	cg20132820	0.276982	0.787717	0.424524	0.0146844	0.342541	18.7661	7.06768	negative	-0.90438	0.817904	0.00080979	0.188638	16.0672	15.0054	17.3199	5.98418	7.98429	6.48154	7.82069	23.4496	21.9884	0.39664	0.39602	0.1888	0.84997	0.51835	0.89179	0.89076	0.25706	0.14639
chr18:74156897-74156897_1	18	74156647	74157147	enhancer	ZNF516	cg15491120	0.188694	0.535103	0.30015	0.0142293	0.339884	18.7661	7.06768	negative	-0.866845	0.75142	0.00248418	0.27611	16.0672	15.0054	17.3199	5.98418	7.98429	6.48154	7.82069	23.4496	21.9884	0.25524	0.19928	0.1704	0.63876	0.34705	0.68511	0.46949	0.2079	0.11065
chr18:74170545-74170545_1	18	74170295	74170795	enhancer	ZNF516	cg06168404	0.13418	0.647022	0.41232	0.0436986	0.403316	18.7661	7.06768	negative	-0.847696	0.718589	0.00389854	0.325952	16.0672	15.0054	17.3199	5.98418	7.98429	6.48154	7.82069	23.4496	21.9884	0.24348	0.14246	0.12603	0.75332	0.25312	0.81725	0.7644	0.09018	0.06875
chr18:74090695-74090695_1	18	74090445	74090945	enhancer	ZNF516	cg06807726	0.426282	0.708233	0.228276	0.0371888	0.391884	18.7661	7.06768	negative	-0.866719	0.751201	0.00249212	0.27611	16.0672	15.0054	17.3199	5.98418	7.98429	6.48154	7.82069	23.4496	21.9884	0.59256	0.44137	0.41087	0.82052	0.80918	0.6651	0.53813	0.3078	0.37881
chr18:74168914-74168914_1	18	74168664	74169164	enhancer	ZNF516	cg25872816	0.284624	0.82389	0.418904	0.0241701	0.369791	18.7661	7.06768	negative	-0.942602	0.888498	0.00014099	0.103615	16.0672	15.0054	17.3199	5.98418	7.98429	6.48154	7.82069	23.4496	21.9884	0.39463	0.30681	0.2618	0.82116	0.74562	0.87118	0.8576	0.27759	0.18229
chr19:53238896-53239423_2	19	53239196	53239696	enh_prom_ins	ZNF611	cg04293891	0.162334	0.36422	0.173894	0.011347	0.32276	2.53028	1.99425	negative	-0.838295	0.702739	0.00476147	0.347466	2.35785	2.26288	2.88272	1.7627	2.21344	1.98819	2.01265	2.68479	2.46316	0.18889	0.16704	0.16012	0.43576	0.2513	0.37322	0.3966	0.18323	0.11239
chr15:90606494-90606494_1	15	90606244	90606744	enhancer	ZNF710	cg18568872	0.173148	0.45189	0.279476	1.219e-07	0.0103523	6.20775	3.91737	negative	-0.844119	0.712536	0.00421305	0.333547	5.15962	5.88651	5.83379	4.11994	4.47564	2.76044	4.31348	6.90659	7.25222	0.18679	0.20736	0.17125	0.42211	0.48086	0.43092	0.47367	0.15672	0.14362
chr15:90614743-90614743_1	15	90614493	90614993	insulator	ZNF710	cg19601144	0.1399	0.322215	0.154268	0.0210147	0.364384	6.20775	3.91737	negative	-0.949754	0.902032	8.912e-05	0.0842235	5.15962	5.88651	5.83379	4.11994	4.47564	2.76044	4.31348	6.90659	7.25222	0.17746	0.17218	0.13806	0.32663	0.21955	0.43128	0.3114	0.11088	0.10092
chr3:140959388-140959388_1	3	140959138	140959638	enhancer	ACPL2	cg24187645	0.075248	0.324635	0.204118	0.0384882	0.393656	0.995044	3.73868	positive	0.875831	0.76708	0.00196315	0.253715	1.0478	0.676192	0.738458	4.65649	1.24164	4.38515	4.67142	1.23202	1.28075	0.08951	0.08478	0.07228	0.23553	0.19402	0.45845	0.41054	0.08572	0.04395
chr3:141012746-141012746_1	3	141012496	141012996	enhancer	ACPL2	cg18685879	0.083614	0.473985	0.342164	0.00742413	0.292273	0.995044	3.73868	positive	0.949495	0.90154	9.072e-05	0.0854632	1.0478	0.676192	0.738458	4.65649	1.24164	4.38515	4.67142	1.23202	1.28075	0.12212	0.10047	0.07261	0.5928	0.2849	0.50577	0.51247	0.07587	0.047
chr1:4815872-4815872_1	1	4815622	4816122	enhancer	AJAP1	cg00562969	0.62152	0.309237	-0.266902	0.00974201	0.31251	4.25176	0.375335	positive	0.89189	0.795468	0.00122888	0.216015	8.18343	0.583342	3.82272	1.00733	0	0.457537	0.036473	6.45863	2.21066	0.72472	0.45759	0.63455	0.44939	0.27958	0.30623	0.20175	0.71711	0.57363
chr1:4744796-4744796_1	1	4744546	4745046	enhancer	AJAP1	cg26231761	0.6528	0.43495	-0.168936	0.0452932	0.406425	4.25176	0.375335	positive	0.873563	0.763112	0.00208673	0.256404	8.18343	0.583342	3.82272	1.00733	0	0.457537	0.036473	6.45863	2.21066	0.76433	0.48772	0.66167	0.52452	0.3814	0.41837	0.41551	0.66299	0.68729
chr5:142499847-142499847_1	5	142499597	142500097	enhancer	ARHGAP26	cg07618462	0.684305	0.86468	0.153261	0.0100285	0.314652	0.675617	1.59078	positive	0.883208	0.780056	0.00364202	0.316955	0.448196	0.773408	0.489976	1.18867	1.39875	1.92443	1.85128	1.01861	0.647897	0.59894		0.72985	0.87354	0.79897	0.88644	0.89977	0.71754	0.69089
chr3:57032141-57032141_1	3	57031891	57032391	enhancer	ARHGEF3	cg05400732	0.27532	0.552702	0.227668	0.0165495	0.350071	1.11087	4.56845	positive	0.914811	0.83688	0.00054619	0.168646	1.3114	1.59562	1.20478	7.05214	4.34883	4.17696	2.69588	0.650199	0.792359	0.34986	0.38716	0.25311	0.68045	0.52096	0.4822	0.5272	0.22386	0.16261
chr5:78277492-78277492_1	5	78277242	78277742	enhancer	ARSB	cg08393937	0.10801	0.41482	0.246212	0.0428374	0.401568	10.2211	15.5751	positive	0.851717	0.725422	0.00356472	0.315097	10.0403	9.7217	11.0306	13.5586	12.7586	15.8373	20.1459	9.73994	10.573	0.09663	0.12715	0.12704	0.53321	0.24941	0.3215	0.55516	0.12621	0.06302
chr5:78126647-78126647_1	5	78126397	78126897	enhancer	ARSB	cg27361227	0.14136	0.359513	0.18657	0.00441261	0.255119	10.2211	15.5751	positive	0.883773	0.781054	0.00157034	0.232481	10.0403	9.7217	11.0306	13.5586	12.7586	15.8373	20.1459	9.73994	10.573	0.19524	0.15279	0.17766	0.31971	0.30845	0.40047	0.40942	0.09432	0.08679
chr13:113437795-113438010_1	13	113437652	113438152	enhancer	ATP11A	cg11218330;cg07296256	0.161633	0.522476	0.28776	0.0393456	0.394775	5.26886	11.0742	positive	0.908414	0.825215	0.00069924	0.182348	4.60375	4.46004	5.67737	11.8027	7.74628	15.0124	9.73538	6.96448	4.63868	0.179255	0.24889	0.179175	0.651765	0.314145	0.661595	0.4624	0.084885	0.11596
chr13:113435678-113437214_5	13	113437178	113437678	enhancer	ATP11A	cg14381255	0.341738	0.715725	0.333154	0.00925904	0.310384	5.26886	11.0742	positive	0.864096	0.746662	0.00266091	0.282452	4.60375	4.46004	5.67737	11.8027	7.74628	15.0124	9.73538	6.96448	4.63868	0.39074	0.39623	0.3209	0.78458	0.46932	0.80594	0.80306	0.263	0.33782
chr13:113407479-113407769_1	13	113407374	113407874	enhancer	ATP11A	cg24199463;cg12758082;cg04656015	0.283109	0.465187	0.157866	0.0192309	0.359804	5.26886	11.0742	positive	0.838994	0.703911	0.00469321	0.34609	4.60375	4.46004	5.67737	11.8027	7.74628	15.0124	9.73538	6.96448	4.63868	0.341603	0.32879	0.25762	0.46	0.33271	0.53553	0.532507	0.284273	0.203257
chr7:69326361-69326361_1	7	69326111	69326611	enhancer	AUTS2	cg10665616	0.247998	0.645115	0.315458	0.038086	0.393029	0.588	3.62641	positive	0.855257	0.731464	0.00328761	0.305769	0.217798	0.540283	0.811312	3.30904	0.474574	6.38603	4.33599	0.334629	1.03598	0.3124	0.29547	0.29296	0.79225	0.41966	0.77154	0.59701	0.15771	0.18145
chr12:25055973-25056473_1	12	25055873	25056373	enh_prom	BCAT1	cg23792314;cg23930313;cg20399616	0.0489473	0.378859	0.274139	0.0267445	0.374157	17.276	56.255	positive	0.95104	0.904477	8.149e-05	0.0789955	14.4167	12.5	13.6358	39.0488	30.2972	93.4623	62.2118	19.226	26.6016	0.06053	0.0571333	0.04445	0.254513	0.253673	0.550467	0.456783	0.0497133	0.03291
chr19:45261682-45262182_1	19	45261582	45262082	enh_prom	BCL3	cg11459773;cg17883035	0.370712	0.614176	0.244281	7.844e-05	0.0611421	6.91377	17.2304	positive	0.880619	0.775489	0.00171911	0.241451	7.38726	6.15523	5.77009	18.3468	16.6587	17.3246	16.5915	7.86947	7.38678	0.39121	0.433895	0.359	0.52892	0.64928	0.60231	0.676195	0.315305	0.35415
chr22:18231246-18231806_2	22	18231546	18232046	enh_ins	BID	cg09896131	0.598386	0.767985	0.158424	0.0126695	0.330772	12.8065	16.212	positive	0.843031	0.710701	0.00431202	0.335635	13.1236	12.5502	13.4487	18.3226	20.729	12.0319	13.7644	11.7979	13.1119	0.60712	0.53326	0.60154	0.76799	0.90349	0.72911	0.67135	0.61559	0.63442
chr7:33961367-33961367_1	7	33961117	33961617	enhancer	BMPER	cg07992659	0.072242	0.396888	0.27195	0.0355097	0.38966	2.36067	12.2812	positive	0.892645	0.796815	0.00120003	0.215228	1.70574	2.00695	4.82077	24.492	7.64718	10.2065	6.77914	1.57671	1.6932	0.06114	0.09037	0.09309	0.61537	0.18516	0.34144	0.44558	0.07963	0.03698
chr10:77871858-77872436_1	10	77871758	77872258	enh_prom	C10orf11	cg26819718;cg24280832;cg04850999	0.0802767	0.645712	0.467846	0.0258231	0.372733	0.152272	2.35509	positive	0.843273	0.711109	0.00428988	0.335297	0.332134	0.160518	0.159212	4.37829	0.286729	2.84753	1.90783	0.0551105	0.0543853	0.11148	0.0923	0.07516	0.637677	0.326713	0.91508	0.703377	0.0786333	0.04381
chr10:77794591-77794696_1	10	77794394	77794894	enhancer	C10orf11	cg14207539;cg23264016;cg02987635	0.148698	0.674593	0.440829	0.0235343	0.368189	0.152272	2.35509	positive	0.853361	0.728225	0.00343411	0.310789	0.332134	0.160518	0.159212	4.37829	0.286729	2.84753	1.90783	0.0551105	0.0543853	0.234195	0.14599	0.132095	0.69334	0.33224	0.86552	0.80727	0.136985	0.094225
chr10:78096093-78096093_1	10	78095843	78096343	enhancer	C10orf11	cg16072382	0.424892	0.63831	0.185218	0.0327884	0.385326	0.152272	2.35509	positive	0.84491	0.713873	0.00414204	0.332962	0.332134	0.160518	0.159212	4.37829	0.286729	2.84753	1.90783	0.0551105	0.0543853	0.45297	0.48354	0.46579	0.76868	0.48185	0.57154	0.73117	0.30093	0.42123
chr10:78283676-78283676_1	10	78283426	78283926	enhancer	C10orf11	cg23966017	0.120056	0.608025	0.406242	0.0299777	0.380245	0.152272	2.35509	positive	0.851196	0.724535	0.00360684	0.315901	0.332134	0.160518	0.159212	4.37829	0.286729	2.84753	1.90783	0.0551105	0.0543853	0.1596	0.17772	0.11295	0.74274	0.2936	0.54927	0.84649	0.08888	0.06113
chr17:77042135-77042850_2	17	77042435	77042935	enh_prom_ins	C1QTNF1	cg00193613;cg03643998;cg08821600	0.0956267	0.376623	0.254117	0.00964542	0.311832	5.52208	44.9884	positive	0.943899	0.890945	0.00013032	0.101202	3.44273	7.77228	6.19793	51.9797	9.86903	37.8296	80.2754	4.67957	5.5179	0.124407	0.0989833	0.1118	0.461233	0.196797	0.374043	0.474417	0.0838067	0.0591367
chr17:77042315-77043179_2	17	77042615	77043115	promoter	C1QTNF1	cg00193613;cg08821600	0.119876	0.500451	0.348	0.00631689	0.280741	5.52208	44.9884	positive	0.933851	0.872079	0.00022966	0.13132	3.44273	7.77228	6.19793	51.9797	9.86903	37.8296	80.2754	4.67957	5.5179	0.16387	0.12686	0.130065	0.57916	0.270735	0.53079	0.62112	0.10384	0.074745
chr5:139558579-139558579_1	5	139558329	139558829	enhancer	C5orf32	cg26211634	0.274142	0.693307	0.357534	0.0115599	0.323674	19.4481	50.0618	positive	0.851577	0.725183	0.00357603	0.315401	18.6147	27.1306	19.7273	71.6782	37.7904	59.5603	31.2185	14.6987	17.0694	0.24081	0.32906	0.32945	0.78624	0.46851	0.74954	0.76894	0.22037	0.25102
chr18:20713659-20714274_2	18	20713959	20714459	enh_prom	CABLES1	cg00455327;cg05384868	0.249134	0.513774	0.215803	0.0354041	0.389373	0.0981528	11.4278	positive	0.898776	0.807798	0.00098288	0.201433	0.0974943	0.103381	0.0718883	7.65731	4.20287	23.9672	9.88363	0.0808346	0.137166	0.27075	0.194135	0.2647	0.54096	0.328555	0.63471	0.55087	0.28408	0.232005
chr18:20713474-20714496_1	18	20713374	20713874	enhancer	CABLES1	cg19786422;cg22158648	0.542131	0.732357	0.154657	0.046023	0.407513	0.0981528	11.4278	positive	0.942152	0.887651	0.00014483	0.103615	0.0974943	0.103381	0.0718883	7.65731	4.20287	23.9672	9.88363	0.0808346	0.137166	0.60572	0.526235	0.50234	0.723325	0.607455	0.873495	0.725155	0.570975	0.505385
chr18:20713659-20714274_1	18	20713559	20714059	enh_prom	CABLES1	cg22158648	0.193588	0.597422	0.322684	0.0481664	0.411245	0.0981528	11.4278	positive	0.938028	0.879897	0.00018355	0.116983	0.0974943	0.103381	0.0718883	7.65731	4.20287	23.9672	9.88363	0.0808346	0.137166	0.32888	0.19027	0.14295	0.59499	0.37164	0.89092	0.53214	0.23011	0.07573
chr11:115371539-115372039_1	11	115371439	115371939	enh_prom	CADM1	cg03505501	0.78279	0.553388	-0.186812	0.0412879	0.3989	9.81788	2.53296	positive	0.857272	0.734915	0.00313666	0.301411	11.9052	13.0025	4.57794	5.177	2.15631	1.37561	1.42294	9.93291	9.67085	0.80771	0.84725	0.75843	0.73978	0.47575	0.48886	0.50916	0.68677	0.81379
chr16:65046268-65046268_1	16	65046018	65046518	enhancer	CDH11	cg01021552	0.05318	0.57804	0.437288	0.0264371	0.374041	37.8993	164.699	positive	0.93927	0.882229	0.0001712	0.113445	31.7774	49.0824	44.1105	269.356	39.586	201.511	148.343	29.9503	34.5758	0.07945	0.04857	0.0827	0.70707	0.24252	0.78919	0.57338	0.03474	0.02044
chr7:90581938-90581938_1	7	90581688	90582188	enhancer	CDK14	cg19617217	0.216828	0.490077	0.24674	0.00249062	0.214781	8.14764	16.0235	positive	0.925418	0.856398	0.00034661	0.146847	7.68931	7.59103	12.0731	19.6141	11.6388	19.5083	13.3329	6.58228	6.80249	0.21108	0.22816	0.26581	0.52902	0.36205	0.56439	0.50485	0.23628	0.14281
chr12:105096609-105096644_1	12	105096376	105096876	enhancer	CHST11	cg05957190;cg07911905	0.245101	0.613779	0.334491	0.0124945	0.328981	0.438885	2.34766	positive	0.863108	0.744956	0.00272643	0.285388	0.369205	0.199123	0.340484	3.66381	0.65036	2.78225	2.29423	0.874573	0.411042	0.34294	0.42471	0.177895	0.791165	0.342075	0.621615	0.70026	0.15518	0.12478
chr16:81547907-81547907_1	16	81547657	81548157	enhancer	CMIP	cg03766174	0.25162	0.62818	0.3323	0.0141921	0.339718	5.41066	10.7375	positive	0.911312	0.83049	0.00062662	0.176378	5.8108	4.95278	4.39597	11.2119	6.86568	10.2723	14.6001	6.2596	5.63415	0.27245	0.22122	0.29451	0.67298	0.36807	0.75583	0.71584	0.22956	0.24036
chr16:81678804-81678968_1	16	81678636	81679136	enhancer	CMIP	cg06896529;cg03122201;cg06473941	0.223545	0.704778	0.405807	0.0134211	0.335206	5.41066	10.7375	positive	0.913317	0.834148	0.0005796	0.173586	5.8108	4.95278	4.39597	11.2119	6.86568	10.2723	14.6001	6.2596	5.63415	0.21456	0.1778	0.247397	0.65357	0.493633	0.843387	0.828523	0.29178	0.18619
chr16:81666633-81666633_1	16	81666383	81666883	enhancer	CMIP	cg01425762	0.071614	0.4971	0.349792	0.0272452	0.375102	5.41066	10.7375	positive	0.935318	0.874819	0.00021264	0.128208	5.8108	4.95278	4.39597	11.2119	6.86568	10.2723	14.6001	6.2596	5.63415	0.06876	0.06428	0.0837	0.54114	0.23104	0.60671	0.60951	0.08167	0.05966
chr12:109107309-109107809_1	12	109107209	109107709	enh_prom	CORO1C	cg10155304	0.709448	0.288118	-0.335394	0.0445293	0.40508	243.234	149.029	positive	0.921309	0.84881	0.00041646	0.153482	233.548	251.334	274.063	155.486	176.826	137.405	126.399	221.543	235.68	0.72372	0.67463	0.71874	0.25269	0.58301	0.13674	0.18003	0.69948	0.73067
chr7:137618712-137618712_1	7	137618462	137618962	enhancer	CREB3L2	cg05222850	0.520284	0.273385	-0.19803	0.0230629	0.367374	28.3189	18.9575	positive	0.841481	0.70809	0.00445575	0.340477	26.8283	27.141	30.3459	23.8376	19.2709	13.8799	18.8417	29.4236	27.8559	0.44684	0.5997	0.43766	0.37747	0.18811	0.25263	0.27533	0.59012	0.5271
chr2:36753857-36753857_1	2	36753607	36754107	enhancer	CRIM1	cg22661341	0.851436	0.605627	-0.196794	0.0419264	0.399754	398.289	242.324	positive	0.932327	0.869233	0.00024836	0.133549	397.254	362.098	364.408	188.062	377.864	188.164	215.207	429.111	438.576	0.82488	0.83612	0.80997	0.63408	0.74804	0.45374	0.58665	0.85934	0.92687
chr2:36682726-36682726_1	2	36682476	36682976	enhancer	CRIM1	cg01831872	0.79449	0.47021	-0.255904	0.0406082	0.397509	398.289	242.324	positive	0.905067	0.819146	0.00079016	0.187702	397.254	362.098	364.408	188.062	377.864	188.164	215.207	429.111	438.576	0.78901	0.80296	0.75552	0.53907	0.62327	0.32464	0.39386	0.81727	0.80769
chr8:19465636-19465636_1	8	19465386	19465886	enhancer	CSGALNACT1	cg21449646	0.624512	0.867847	0.201786	0.00722162	0.29144	0.128679	1.82241	positive	0.84383	0.71205	0.00423912	0.333578	0.24294	0.0946574	0.083921	0.836433	2.04242	2.96378	1.44701	0.1797	0.0421786	0.63214	0.6486	0.58218	0.87978	0.89377	0.88603	0.81181	0.58613	0.67351
chr7:101566857-101566940_1	7	101566648	101567148	enhancer	CUX1	cg02307880;cg21291321	0.094668	0.531215	0.355214	0.0348945	0.388796	22.4543	50.3827	positive	0.885722	0.784504	0.001483	0.227748	23.2289	28.2946	20.0007	31.1329	39.7708	82.622	48.005	19.3221	21.4252	0.156015	0.086035	0.09063	0.48943	0.271345	0.762915	0.60117	0.08338	0.05728
chr2:38304410-38305038_2	2	38304710	38305210	enh_prom	CYP1B1	cg12802310;cg05062676	0.128066	0.646004	0.430413	0.0233285	0.3677	0.134096	55.9579	positive	0.840352	0.706191	0.00456253	0.342721	0.0938017	0.122964	0.312762	26.621	47.8496	80.528	68.8329	0.0235272	0.117426	0.18357	0.12478	0.12412	0.775555	0.329805	0.800815	0.67784	0.11426	0.0936
chr9:90195885-90195885_1	9	90195635	90196135	enhancer	DAPK1	cg14250336	0.49981	0.81579	0.310786	0.00067195	0.139866	0.179965	17.4506	positive	0.894841	0.80074	0.00111877	0.210408	0.222689	0.099557	0.151526	15.2341	6.09559	26.229	22.2439	0.0677141	0.35834	0.57862	0.61034	0.37812	0.82288	0.68778	0.86053	0.89197	0.50717	0.4248
chr9:90185475-90185475_1	9	90185225	90185725	enhancer	DAPK1	cg14159523	0.367932	0.70376	0.352716	4.853e-05	0.0549849	0.179965	17.4506	positive	0.899724	0.809504	0.00095193	0.20008	0.222689	0.099557	0.151526	15.2341	6.09559	26.229	22.2439	0.0677141	0.35834	0.36789	0.39122	0.44082	0.65143	0.64509	0.71192	0.8066	0.29497	0.34476
chr10:711556-712394_2	10	711856	712356	promoter	DIP2C	cg26807432;cg26311782;cg23681599;cg24962011;cg13775636	0.804928	0.496659	-0.259245	0.0412381	0.398775	11.3673	7.85119	positive	0.869724	0.75642	0.002308	0.265361	11.1966	10.836	9.96968	6.32613	8.76775	8.04115	8.26972	12.3319	12.5025	0.83298	0.787502	0.761678	0.362192	0.771132	0.384604	0.468708	0.823742	0.81874
chr10:712256-712767_1	10	712156	712656	enh_prom	DIP2C	cg24962011;cg12760625;cg16942135;cg26807432;cg18072147	0.846198	0.642927	-0.166257	0.0470952	0.409357	11.3673	7.85119	positive	0.873501	0.763003	0.00209021	0.256404	11.1966	10.836	9.96968	6.32613	8.76775	8.04115	8.26972	12.3319	12.5025	0.855694	0.819026	0.812234	0.5818	0.815606	0.546916	0.627388	0.862806	0.881228
chr10:711556-712394_1	10	711456	711956	promoter	DIP2C	cg13775636;cg23681599;cg17333886;cg10494981	0.750622	0.471667	-0.232877	0.0204377	0.363848	11.3673	7.85119	positive	0.920386	0.84711	0.00043341	0.155174	11.1966	10.836	9.96968	6.32613	8.76775	8.04115	8.26972	12.3319	12.5025	0.79752	0.757722	0.685125	0.363555	0.63827	0.42799	0.456852	0.76404	0.7487
chr10:384286-384652_1	10	384219	384719	enhancer	DIP2C	cg17463564;cg14072016;cg13859346;cg12519998	0.812433	0.445377	-0.29032	0.0371295	0.391837	11.3673	7.85119	positive	0.875794	0.767014	0.00196516	0.253715	11.1966	10.836	9.96968	6.32613	8.76775	8.04115	8.26972	12.3319	12.5025	0.817647	0.799455	0.797145	0.40348	0.637115	0.293218	0.447695	0.80397	0.843947
chr10:530935-531435_1	10	530835	531335	enh_prom	DIP2C	cg00219169;cg27421267;cg09955645	0.598472	0.378438	-0.181955	0.00913197	0.309594	11.3673	7.85119	positive	0.854466	0.730111	0.00334821	0.307662	11.1966	10.836	9.96968	6.32613	8.76775	8.04115	8.26972	12.3319	12.5025	0.590563	0.5888	0.59766	0.40987	0.396053	0.330233	0.377597	0.57757	0.637767
chr10:639935-640085_1	10	639760	640260	enhancer	DIP2C	cg15912031;cg13544966;cg24429708	0.356669	0.0524567	-0.244007	0.0125284	0.329156	11.3673	7.85119	positive	0.863444	0.745535	0.00270406	0.284528	11.1966	10.836	9.96968	6.32613	8.76775	8.04115	8.26972	12.3319	12.5025	0.401513	0.36692	0.301823	0.07471	0.06304	0.02445	0.0476267	0.41267	0.30042
chr4:148401173-148401751_2	4	148401473	148401973	enh_prom	EDNRA	cg05618426;cg00974629;cg00379467	0.126666	0.473254	0.290388	0.0138013	0.337593	0.175739	2.36707	positive	0.895195	0.801374	0.00110603	0.210408	0.224909	0.16863	0.0952171	3.00727	0.333537	4.46442	1.66305	0.289252	0.100685	0.13359	0.154247	0.135887	0.533573	0.31672	0.55883	0.483893	0.112863	0.0967433
chr4:148401573-148402151_2	4	148401873	148402373	enh_prom	EDNRA	cg00974629;cg12009023;cg05618426	0.106701	0.365691	0.218239	0.0118382	0.325511	0.175739	2.36707	positive	0.899166	0.8085	0.00097006	0.200812	0.224909	0.16863	0.0952171	3.00727	0.333537	4.46442	1.66305	0.289252	0.100685	0.111133	0.127633	0.11544	0.397077	0.258907	0.440733	0.366047	0.0932267	0.0860733
chr14:100288139-100288639_1	14	100288039	100288539	enh_prom	EML1	cg09209510	0.616796	0.334655	-0.317946	0.00051022	0.126248	22.0394	7.14585	positive	0.886495	0.785873	0.00144934	0.226468	18.253	20.2568	22.1304	2.62508	17.1111	4.06812	4.77909	31.404	18.1527	0.60742	0.61661	0.59499	0.30026	0.36554	0.39117	0.28165	0.69134	0.57362
chr13:108500146-108500146_1	13	108499896	108500396	enhancer	FAM155A	cg03176971	0.778298	0.47188	-0.299744	0.0120916	0.326153	6.97506	3.50745	positive	0.951216	0.904811	8.049e-05	0.0789955	7.54932	5.24686	7.84776	6.06	5.21629	1.51155	1.24195	8.0303	6.20107	0.78791	0.69698	0.77031	0.68518	0.55455	0.39	0.25779	0.83012	0.80617
chr6:111984120-111984620_1	6	111984020	111984520	enh_prom	FYN	cg14482998	0.21675	0.685928	0.384238	0.0215963	0.364433	8.48423	23.0145	positive	0.896397	0.803528	0.00106357	0.207523	7.19741	15.8446	4.45428	19.0576	9.4091	36.1805	27.4107	6.90614	8.01874	0.35831	0.2482	0.18832	0.60748	0.47152	0.86988	0.79483	0.1243	0.16462
chr5:153599583-153599583_1	5	153599333	153599833	enhancer	GALNT10	cg16319535	0.517418	0.820043	0.279666	0.00523897	0.267642	24.7528	49.0045	positive	0.838176	0.70254	0.00477312	0.347649	25.287	13.2197	34.6089	50.7724	29.4876	53.9552	61.8029	18.1042	32.5443	0.71511	0.43713	0.46034	0.86303	0.63373	0.8969	0.88651	0.4904	0.48411
chr5:153784605-153785252_2	5	153784905	153785405	enh_prom_ins	GALNT10	cg00408567;cg26013791	0.131208	0.328114	0.168088	0.0202322	0.363002	24.7528	49.0045	positive	0.881656	0.777317	0.00166916	0.238027	25.287	13.2197	34.6089	50.7724	29.4876	53.9552	61.8029	18.1042	32.5443	0.20816	0.099605	0.14418	0.390525	0.18398	0.34943	0.38852	0.1212	0.082895
chr7:2854512-2854958_2	7	2854812	2855312	enhancer	GNA12	cg11018271	0.929608	0.554608	-0.365764	0.00341388	0.237556	51.8402	40.0873	positive	0.912467	0.832595	0.00059923	0.174369	49.3428	53.2157	54.8074	38.9708	43.2339	39.1382	39.0062	47.7519	54.0832	0.91898	0.92121	0.9093	0.49732	0.77359	0.53657	0.41095	0.93181	0.96674
chr14:52350805-52351305_1	14	52350705	52351205	enh_prom	GNG2	cg27019717	0.062036	0.75474	0.569298	0.0180108	0.355847	1.0176	5.82142	positive	0.880164	0.77469	0.0017413	0.242631	0.86765	0.571595	1.40287	8.75451	2.19343	8.91918	3.41855	0.763988	1.48189	0.07267	0.06133	0.1008	0.85221	0.44381	0.90049	0.82245	0.0409	0.03448
chr7:139409421-139409421_1	7	139409171	139409671	enhancer	HIPK2	cg00977978	0.163004	0.737387	0.491522	0.00787981	0.297021	2.8286	7.53958	positive	0.963444	0.928224	2.967e-05	0.0569827	2.61502	2.41286	3.37637	8.99327	4.46775	7.85046	8.84685	2.33301	3.40572	0.14962	0.23639	0.19607	0.80913	0.49493	0.83776	0.80773	0.10846	0.12448
chr7:139468310-139468310_1	7	139468060	139468560	enhancer	HIPK2	cg06079564	0.538568	0.837425	0.255018	0.00424653	0.252543	2.8286	7.53958	positive	0.919122	0.844786	0.00045739	0.157584	2.61502	2.41286	3.37637	8.99327	4.46775	7.85046	8.84685	2.33301	3.40572	0.64309	0.52024	0.49024	0.84247	0.74274	0.86436	0.90013	0.47887	0.5604
chr7:27193351-27194013_2	7	27193651	27194151	enhancer	HOXA7	cg08396193;cg24389054	0.894108	0.682723	-0.177145	0.0395392	0.394951	5.36146	1.89552	positive	0.874695	0.765091	0.0020244	0.254561	5.19226	5.91145	6.69811	2.0763	4.83157	0.199809	0.4744	2.97597	6.0295	0.902745	0.887035	0.8801	0.702965	0.829065	0.674205	0.524655	0.875345	0.925315
chr7:27196455-27197202_3	7	27197155	27197655	enh_prom	HOXA7	cg02384857;cg15372603;cg19147218;cg06911354	0.893877	0.442049	-0.358593	0.043095	0.402077	5.36146	1.89552	positive	0.897128	0.804838	0.00103832	0.206284	5.19226	5.91145	6.69811	2.0763	4.83157	0.199809	0.4744	2.97597	6.0295	0.891995	0.897525	0.878153	0.49075	0.706987	0.340205	0.230255	0.881587	0.920125
chr7:27197102-27197755_2	7	27197402	27197902	enh_prom	HOXA7	cg02384857;cg06911354;cg19147218;cg02000318;cg03232620	0.885663	0.421084	-0.36877	0.0441373	0.404562	5.36146	1.89552	positive	0.902346	0.814229	0.00086992	0.196232	5.19226	5.91145	6.69811	2.0763	4.83157	0.199809	0.4744	2.97597	6.0295	0.869938	0.88627	0.873526	0.483188	0.700046	0.273512	0.227592	0.879956	0.918624
chr7:27197102-27197755_1	7	27197002	27197502	enh_prom	HOXA7	cg06911354;cg15372603	0.8854	0.45703	-0.339382	0.039278	0.394775	5.36146	1.89552	positive	0.889159	0.790603	0.00133733	0.220193	5.19226	5.91145	6.69811	2.0763	4.83157	0.199809	0.4744	2.97597	6.0295	0.878595	0.8865	0.86625	0.45147	0.701735	0.399105	0.27581	0.87269	0.922965
chr7:27197655-27198402_1	7	27197555	27198055	enh_prom	HOXA7	cg02000318;cg03232620;cg02384857;cg06934774	0.881604	0.409918	-0.376195	0.0418022	0.399664	5.36146	1.89552	positive	0.901997	0.813599	0.00088054	0.196232	5.19226	5.91145	6.69811	2.0763	4.83157	0.199809	0.4744	2.97597	6.0295	0.867712	0.885642	0.867472	0.488787	0.68319	0.239817	0.227878	0.874332	0.91286
chr12:54440773-54441509_3	12	54441473	54441973	promoter	HOXC4	cg10366797	0.64181	0.87881	0.199992	0.00638922	0.281246	0.117456	3.81386	positive	0.931463	0.867624	0.00076403	0.187646	1.967e-30	0.451036	0.0574771	4.61202	1.26349	4.70073	4.67922	0.0263661	0.0524015	0.54625	0.65321	0.63079	0.84838		0.90616	0.88189	0.66286	0.71594
chr12:54438419-54438419_1	12	54438169	54438669	enhancer	HOXC4	cg19696083	0.276904	0.45685	0.15631	0.0297951	0.379676	0.117456	3.81386	positive	0.89415	0.799505	0.0011439	0.210408	1.967e-30	0.451036	0.0574771	4.61202	1.26349	4.70073	4.67922	0.0263661	0.0524015	0.20322	0.40926	0.27836	0.56256	0.3161	0.46047	0.48827	0.23653	0.25715
chr12:54444213-54444847_2	12	54444513	54445013	enh_prom	HOXC4	cg11594833	0.405876	0.813858	0.34521	0.00795629	0.297854	0.117456	3.81386	positive	0.949043	0.900683	9.355e-05	0.0874274	1.967e-30	0.451036	0.0574771	4.61202	1.26349	4.70073	4.67922	0.0263661	0.0524015	0.29831	0.52489	0.44958	0.85768	0.63464	0.91166	0.85145	0.29591	0.46069
chr12:54409507-54410170_1	12	54409407	54409907	enh_prom	HOXC4	cg12905836;cg16937769;cg06714180;cg04704531;cg13726459;cg15817960	0.593958	0.756874	0.139076	0.0281137	0.376919	0.117456	3.81386	positive	0.874441	0.764648	0.00203825	0.254961	1.967e-30	0.451036	0.0574771	4.61202	1.26349	4.70073	4.67922	0.0263661	0.0524015	0.533408	0.710375	0.552312	0.740995	0.656057	0.859213	0.77123	0.612485	0.56121
chr12:54440773-54441509_1	12	54440673	54441173	promoter	HOXC4	cg21216477;cg19058685;cg02017718	0.386937	0.609972	0.194065	0.0326052	0.384901	0.117456	3.81386	positive	0.929482	0.863936	0.00028605	0.13931	1.967e-30	0.451036	0.0574771	4.61202	1.26349	4.70073	4.67922	0.0263661	0.0524015	0.276153	0.463143	0.40851	0.606587	0.413673	0.74619	0.673437	0.37557	0.41131
chr12:54446019-54447430_1	12	54445919	54446419	enhancer	HOXC4	cg27138204;cg22370252;cg21493516;cg05992786;cg15244786;cg05408649;cg26201952	0.0832949	0.615636	0.435199	0.0270638	0.374955	0.117456	3.81386	positive	0.977979	0.956443	5.107e-06	0.0342577	1.967e-30	0.451036	0.0574771	4.61202	1.26349	4.70073	4.67922	0.0263661	0.0524015	0.101464	0.0980486	0.0926571	0.585714	0.32502	0.740356	0.811454	0.0776857	0.0466186
chr12:54440773-54441509_2	12	54441073	54441573	promoter	HOXC4	cg02721000;cg10366797;cg08465346	0.568627	0.801747	0.200457	0.038166	0.393137	0.117456	3.81386	positive	0.911257	0.83039	0.00062795	0.176378	1.967e-30	0.451036	0.0574771	4.61202	1.26349	4.70073	4.67922	0.0263661	0.0524015	0.408297	0.636613	0.595803	0.82457	0.58843	0.926513	0.867473	0.580107	0.622317
chr12:54409207-54410727_1	12	54409107	54409607	enhancer	HOXC4	cg22621272;cg01473837;cg15817960;cg18040878;cg26019295;cg16937769;cg15660418;cg04105511;cg04704531;cg06714180	0.491739	0.741683	0.206311	0.0335185	0.386249	0.117456	3.81386	positive	0.951255	0.904887	8.026e-05	0.0789955	1.967e-30	0.451036	0.0574771	4.61202	1.26349	4.70073	4.67922	0.0263661	0.0524015	0.400318	0.58422	0.472548	0.768708	0.554088	0.85884	0.785094	0.540537	0.461073
chr12:54446019-54447430_2	12	54446319	54446819	enhancer	HOXC4	cg25975485;cg08712054;cg03416628	0.0491867	0.282334	0.193867	0.0182645	0.357266	0.117456	3.81386	positive	0.984164	0.968579	1.62e-06	0.0266786	1.967e-30	0.451036	0.0574771	4.61202	1.26349	4.70073	4.67922	0.0263661	0.0524015	0.0569	0.0539333	0.0612467	0.288157	0.164043	0.328183	0.348953	0.0445133	0.02934
chr2:10447890-10447890_1	2	10447640	10448140	enhancer	HPCAL1	cg14118850	0.701882	0.373845	-0.291644	0.0443829	0.404715	43.2922	19.2858	positive	0.90369	0.816656	0.00082986	0.191408	41.3805	39.7235	47.3845	21.6109	30.4264	12.1471	12.9588	39.2275	48.7448	0.72091	0.71646	0.67564	0.32199	0.73056	0.19867	0.24416	0.69812	0.69828
chr10:6020208-6020726_1	10	6020108	6020608	enh_prom	IL15RA	cg24348573;cg10686550;cg09290866	0.101073	0.464162	0.319376	0.00690131	0.287294	1.30214	4.56568	positive	0.920634	0.847568	0.0004288	0.155174	1.38639	1.56356	0.749457	4.5284	2.64624	4.65809	6.43	1.29275	1.51854	0.1267	0.14118	0.103627	0.479123	0.292443	0.594913	0.490167	0.07693	0.05693
chr10:6020208-6020726_2	10	6020508	6021008	enh_prom	IL15RA	cg13730379	0.384832	0.729182	0.332174	6.842e-05	0.0587375	1.30214	4.56568	positive	0.873894	0.76369	0.00206839	0.256404	1.38639	1.56356	0.749457	4.5284	2.64624	4.65809	6.43	1.29275	1.51854	0.48594	0.40774	0.33895	0.68868	0.7141	0.74933	0.76462	0.39038	0.30115
chr3:13113959-13115843_5	3	13115459	13115959	promoter	IQSEC1	cg13035046	0.634808	0.3686	-0.261142	0.0158812	0.348286	9.09613	7.40426	positive	0.848909	0.720647	0.00379568	0.322144	9.65078	10.7943	7.76597	5.34377	10.3667	7.43953	6.46704	8.83245	8.43715	0.72676	0.62592	0.59351	0.26601	0.62487	0.35045	0.23307	0.65441	0.57344
chr6:15400817-15401317_1	6	15400717	15401217	enh_prom	JARID2	cg22570970	0.065592	0.406565	0.281672	0.0213714	0.364433	5.47763	6.79042	positive	0.876096	0.767545	0.00194905	0.253298	6.18154	4.89365	4.75543	6.64347	5.85664	7.2562	7.40537	6.11172	5.44581	0.1037	0.0528	0.07158	0.42784	0.2154	0.47553	0.50749	0.08481	0.01507
chr3:156091058-156091058_1	3	156090808	156091308	enhancer	KCNAB1	cg03341748	0.165296	0.356768	0.205638	0.0121332	0.326369	0.53934	8.77793	positive	0.859668	0.73903	0.00296342	0.294077	0.418727	0.411205	0.697794	29.6883	0.449862	0.691991	4.28156	0.618316	0.550656	0.23768	0.15459	0.16702	0.53938	0.24845	0.31376	0.32548	0.15888	0.10831
chr2:26943410-26943910_1	2	26943310	26943810	enh_prom	KCNK3	cg05616379	0.28482	0.57482	0.235048	0.0448451	0.40553	0.0122491	1.34622	positive	0.843963	0.712274	0.00422707	0.333547	0.0409815	0	0.0099892	2.54438	0.128728	1.94779	0.763976	0.0102748	0	0.30898	0.35928	0.25064	0.63513	0.33612	0.65468	0.67335	0.25613	0.24907
chr4:154451068-154451068_1	4	154450818	154451318	enhancer	KIAA0922	cg02830749	0.453192	0.804168	0.300024	0.00430697	0.253436	1.15501	8.78986	positive	0.900332	0.810597	0.00093247	0.199809	1.26916	1.19268	0.752533	10.7131	2.28877	13.3056	8.85198	1.30561	1.25506	0.48497	0.54822	0.41166	0.80273	0.69383	0.88023	0.83988	0.44608	0.37503
chr10:24417827-24417827_1	10	24417577	24418077	enhancer	KIAA1217	cg05217312	0.212102	0.46833	0.249604	0.00074907	0.145655	0.421357	4.07359	positive	0.856656	0.733859	0.0031823	0.302156	0.248634	0.700784	0.401347	7.68411	2.27166	3.21076	3.12784	0.334872	0.421149	0.27347	0.19893	0.21473	0.56647	0.43593	0.51575	0.35517	0.24854	0.12484
chr17:25819112-25819112_1	17	25818862	25819362	enhancer	KSR1	cg08041350	0.23884	0.442453	0.186764	0.0104274	0.31727	1.47165	4.23502	positive	0.881736	0.777458	0.00166535	0.238027	1.3352	0.98412	1.03842	3.90628	1.47401	4.24871	7.31108	2.1447	1.85579	0.28058	0.25869	0.22412	0.48743	0.2881	0.46858	0.5257	0.24641	0.1844
chr19:14260369-14260869_1	19	14260269	14260769	enh_prom	LPHN1	cg15417798;cg04416414;cg14565903	0.172798	0.480531	0.267969	0.0290084	0.378244	0.633604	2.66643	positive	0.938147	0.880121	0.00018234	0.116459	0.517788	1.20123	0.424554	3.01863	1.04762	3.37533	3.22414	0.503572	0.520875	0.174787	0.211437	0.19054	0.675627	0.235587	0.480133	0.530777	0.148173	0.139053
chr19:14315444-14316094_1	19	14315344	14315844	enh_prom	LPHN1	cg02286761	0.1897	0.358768	0.181624	0.00277756	0.221432	0.633604	2.66643	positive	0.884045	0.781536	0.00155791	0.232481	0.517788	1.20123	0.424554	3.01863	1.04762	3.37533	3.22414	0.503572	0.520875	0.16506	0.14784	0.2476	0.38094	0.26138	0.45065	0.3421	0.19735	0.19065
chr19:14276911-14276911_1	19	14276661	14277161	insulator	LPHN1	cg08173263	0.389494	0.692185	0.286392	0.0215674	0.364433	0.633604	2.66643	positive	0.965924	0.933009	2.326e-05	0.0557384	0.517788	1.20123	0.424554	3.01863	1.04762	3.37533	3.22414	0.503572	0.520875	0.30141	0.43347	0.41921	0.68221	0.40623	0.84995	0.83035	0.39806	0.39532
chr3:65779802-65779802_1	3	65779552	65780052	enhancer	MAGI1	cg04391800	0.313236	0.745147	0.35999	0.0322801	0.384416	2.68613	10.7188	positive	0.908204	0.824834	0.00070471	0.18269	2.65635	2.27308	3.00699	8.04017	4.727	17.3965	12.7114	2.73544	2.7588	0.25522	0.35755	0.41324	0.84794	0.4051	0.9103	0.81725	0.24977	0.2904
chr3:65579841-65580341_1	3	65579741	65580241	enh_prom	MAGI1	cg23080908	0.210122	0.65481	0.351616	0.0424957	0.401041	2.68613	10.7188	positive	0.903286	0.815925	0.00084177	0.193654	2.65635	2.27308	3.00699	8.04017	4.727	17.3965	12.7114	2.73544	2.7588	0.30479	0.16902	0.16788	0.7562	0.36028	0.80426	0.6985	0.24109	0.16783
chr5:71452580-71452580_1	5	71452330	71452830	enhancer	MAP1B	cg05173749	0.08013	0.579795	0.413596	0.0278053	0.375932	18.0288	48.3166	positive	0.926234	0.857909	0.00033379	0.145624	15.9884	14.1842	19.3457	68.949	24.6936	36.1106	63.5131	17.4376	23.1883	0.09633	0.11574	0.07303	0.75053	0.24924	0.62062	0.69879	0.07229	0.04326
chr15:68055293-68055293_1	15	68055043	68055543	enhancer	MAP2K5	cg20055861	0.117254	0.55865	0.369056	0.0175848	0.354063	4.09601	5.41383	positive	0.879393	0.773331	0.00177948	0.245176	4.72981	4.26626	3.29701	5.16607	4.3278	6.8108	5.35065	4.35955	3.8274	0.14522	0.19811	0.09071	0.55144	0.33217	0.73755	0.61344	0.08032	0.07191
chr18:74770431-74770589_1	18	74770260	74770760	promoter	MBP	cg21655444;cg07807210;cg07006718	0.21536	0.719273	0.426563	0.00824068	0.300854	1.03221	8.78859	positive	0.945812	0.89456	0.00011564	0.0949862	2.71173	1.82853	0.338559	7.72014	7.75539	12.6748	7.00402	0.110787	0.171444	0.281317	0.256883	0.255147	0.806087	0.535847	0.84502	0.69014	0.124367	0.159087
chr18:74826769-74826769_1	18	74826519	74827019	enhancer	MBP	cg27262850	0.188646	0.400353	0.17204	0.0212383	0.364428	1.03221	8.78859	positive	0.883049	0.779775	0.00160366	0.233661	2.71173	1.82853	0.338559	7.72014	7.75539	12.6748	7.00402	0.110787	0.171444	0.1885	0.20473	0.21787	0.45471	0.29884	0.42885	0.41901	0.17388	0.15825
chr18:74839966-74840466_1	18	74839866	74840366	enh_ins	MBP	cg26457248	0.079392	0.673852	0.495478	0.0197674	0.361624	1.03221	8.78859	positive	0.870141	0.757146	0.00228319	0.264719	2.71173	1.82853	0.338559	7.72014	7.75539	12.6748	7.00402	0.110787	0.171444	0.13103	0.05944	0.06155	0.81647	0.33141	0.76654	0.78099	0.10527	0.03967
chr18:74770815-74770815_1	18	74770565	74771065	enhancer	MBP	cg13852093;cg07006718	0.259722	0.701745	0.383641	0.00783545	0.296572	1.03221	8.78859	positive	0.922444	0.850903	0.00039626	0.150382	2.71173	1.82853	0.338559	7.72014	7.75539	12.6748	7.00402	0.110787	0.171444	0.31069	0.283655	0.28166	0.8118	0.49532	0.807515	0.692345	0.192015	0.23059
chr5:112560177-112560177_1	5	112559927	112560427	enhancer	MCC	cg02528008	0.124856	0.36186	0.18669	0.041015	0.398365	2.46761	9.09486	positive	0.8522	0.726245	0.003526	0.313481	3.26074	3.86669	1.7312	15.4362	3.85927	9.37449	7.70946	1.42855	2.05089	0.15067	0.14197	0.22959	0.48669	0.27808	0.28042	0.40225	0.05079	0.05126
chr18:55862037-55862872_1	18	55861937	55862437	enhancer	NEDD4L	cg18720828;cg18524262;cg07324054	0.882895	0.576146	-0.247909	0.0258255	0.372741	14.9799	7.93426	positive	0.955313	0.912623	5.945e-05	0.0722649	14.7687	15.3495	16.355	10.1664	12.3719	4.11133	5.08742	12.7404	15.6861	0.874907	0.876277	0.88661	0.59472	0.717777	0.47636	0.515727	0.874537	0.902147
chr9:127032953-127032953_1	9	127032703	127033203	enhancer	NEK6	cg14285539	0.503016	0.688503	0.172364	0.0103618	0.316976	31.1174	40.5961	positive	0.87517	0.765922	0.00199865	0.254561	31.3032	37.9959	26.0684	41.6724	37.9963	46.8568	35.8588	29.6907	30.529	0.57211	0.49835	0.44951	0.74165	0.6233	0.80432	0.58474	0.53407	0.46104
chr9:14082328-14082328_1	9	14082078	14082578	enhancer	NFIB	cg14431257	0.696828	0.878537	0.185408	0.0036467	0.242479	0.0764655	9.80119	positive	0.879748	0.773956	0.00176184	0.243921	0.0533627	0.222273	0.0481333	9.35921	2.91083	14.2495	12.6852	0.00976813	0.0487904	0.61073	0.74588	0.72427	0.90624	0.76253	0.91375	0.93163	0.62336	0.7799
chr19:13206989-13207639_1	19	13206889	13207389	enh_prom_ins	NFIX	cg07788061	0.270098	0.582313	0.26865	0.00941621	0.31107	6.88348	34.4706	positive	0.924247	0.854233	0.00036559	0.150201	9.37008	7.65625	5.3781	32.3644	13.4603	49.3578	42.6999	4.7189	7.29408	0.33467	0.34074	0.25283	0.64334	0.4054	0.62021	0.6603	0.25802	0.16423
chr19:13209206-13209706_1	19	13209106	13209606	enh_prom	NFIX	cg25417223;cg00689651;cg09331335	0.125266	0.312825	0.158313	0.0387311	0.394267	6.88348	34.4706	positive	0.976549	0.953648	6.355e-06	0.0342933	9.37008	7.65625	5.3781	32.3644	13.4603	49.3578	42.6999	4.7189	7.29408	0.131237	0.119393	0.14753	0.325807	0.150727	0.372197	0.40257	0.11102	0.11715
chr9:127249562-127249749_1	9	127249406	127249906	promoter	NR5A1	cg01786973;cg14219918	0.171558	0.622449	0.372938	0.0249149	0.371408	0.00267114	10.0423	positive	0.977941	0.956369	5.137e-06	0.0342577	0	0	0	7.01653	3.63594	13.8433	15.6735	0	0.0133557	0.181295	0.223075	0.19689	0.48112	0.430745	0.80907	0.76886	0.150445	0.106085
chr9:127265989-127266395_1	9	127265889	127266389	promoter	NR5A1	cg04043571	0.095028	0.58197	0.407684	0.0172096	0.353201	0.00267114	10.0423	positive	0.958725	0.919154	4.517e-05	0.0695739	0	0	0	7.01653	3.63594	13.8433	15.6735	0	0.0133557	0.10728	0.09472	0.10128	0.39283	0.47447	0.74079	0.71979	0.10223	0.06963
chr2:206628372-206628872_2	2	206628672	206629172	prom_ins	NRP2	cg14157435	0.195058	0.565978	0.321546	0.0379721	0.392935	11.1781	114.65	positive	0.943568	0.890321	0.00013298	0.101202	9.53665	5.82239	9.03537	100.331	53.0095	177.584	127.676	14.5468	16.9495	0.15054	0.08283	0.26705	0.5061	0.25147	0.83235	0.67399	0.35615	0.11872
chr14:79748391-79748891_1	14	79748291	79748791	enh_prom	NRXN3	cg24020215	0.62837	0.415098	-0.186128	0.0101371	0.315171	14.9491	6.74546	positive	0.869965	0.75684	0.00229363	0.264719	13.7621	16.7319	10.0678	8.21256	10.8448	3.181	4.74349	15.3354	18.8484	0.68213	0.65453	0.5863	0.43024	0.51077	0.29398	0.4254	0.62212	0.59677
chr14:79982284-79982284_1	14	79982034	79982534	enhancer	NRXN3	cg15434778	0.869844	0.679388	-0.15541	0.0167442	0.350817	14.9491	6.74546	positive	0.879008	0.772656	0.00179869	0.246129	13.7621	16.7319	10.0678	8.21256	10.8448	3.181	4.74349	15.3354	18.8484	0.85077	0.90148	0.85581	0.66497	0.75129	0.67377	0.62752	0.87685	0.86431
chr11:78521705-78521705_1	11	78521455	78521955	enhancer	ODZ4	cg18224993	0.354146	0.542455	0.191884	0.0256497	0.372698	0.157051	3.14884	positive	0.89389	0.799039	0.00115349	0.210408	0.127689	0.34299	0.110655	6.60244	0.438312	2.25207	3.30253	0.125295	0.0786284	0.41727	0.39952	0.37484	0.75763	0.47594	0.42017	0.51608	0.24395	0.33515
chr11:78974086-78974086_1	11	78973836	78974336	enhancer	ODZ4	cg11076902	0.12762	0.512672	0.316142	0.0306541	0.381104	0.157051	3.14884	positive	0.862572	0.744031	0.00276249	0.286674	0.127689	0.34299	0.110655	6.60244	0.438312	2.25207	3.30253	0.125295	0.0786284	0.13471	0.13684	0.14408	0.61201	0.25007	0.6022	0.58641	0.11389	0.10858
chr10:34612060-34612060_1	10	34611810	34612310	enhancer	PARD3	cg09461005	0.18524	0.425225	0.230228	0.0460547	0.407513	10.5911	13.5437	positive	0.915439	0.838028	0.00053258	0.166377	10.5643	10.8004	11.1498	16.0272	11.9066	15.002	11.239	9.33621	11.1047	0.19575	0.24086	0.24661	0.69105	0.20642	0.48392	0.31951	0.1482	0.09478
chr6:166045279-166045279_1	6	166045029	166045529	enhancer	PDE10A	cg14393693	0.430646	0.77358	0.299432	0.0491133	0.412442	0.0662534	3.13922	positive	0.867454	0.752476	0.00244619	0.274038	0.106892	0.0614772	0.0997079	6.12383	0.238979	2.87671	3.31737	0	0.0631901	0.34135	0.46987	0.52244	0.89167	0.3876	0.88708	0.92797	0.29833	0.52124
[truncated: 88 more rows]
