# Supplementary material for: Epigenetic Alterations Affecting Transcription Factors and Signaling Pathways in Stromal Cells of Endometriosis
Source: PLoS One. 2017 Jan 26;12(1):e0170859. doi: 10.1371/journal.pone.0170859 (PMC5268815; doi:10.1371/journal.pone.0170859)
Supplement: S7 Table — (XLSX) [file pone.0170859.s015.xlsx]

## Sheet: S7Table
Gene name	primer Fw (5'-3')	primer_Rev (5'-3')	amplicon position	product length	CpG
BDNF	TAGAAAATTGGTTAGGGTTTTTTTT	CCCTCAAACCACTACTATTCCTATC	chr11:27,680,155-27,680,605	451	2
BDNF	GGATTTTTTTAAGGATTGTGAT	AAATAACTTAACCTACCCAAATATAC	chr11:27,679,601-27,680,025	425	16
BDNF	TTAGAGATGTTTTTTTTGTGTGTGTG	AATTCTAAAATCCTTCACCACCTAAC	chr11:27,681,161-27,681,501	341	9
JAZF1	TTAGTTTGAATAAAATAAATTATGG	TTTCTTCTAATTTATAAAAAAAATT	chr7:27,946,223-27,946,665	443	4
JAZF1	TATTTAGTTAAGAATAAGGGATTTT	ACCAAATACCCAAACCAAAATATT	chr7:27,947,220-27,947,647	428	6
JAZF1	TTGTTTTGATGAAGAAAAGTTATAATATAA	AAAAAATAATTCTTAAATACTATCCACACC	chr7:27,945,507-27,945,989	484	4
JAZF1	TAGATTTAGATTTATGAATGAATTGATAAT	CTCTCCCCATAATAAACAAAAATTTAA	chr7:28,216,653-28,216,956	304	3
JAZF1	TTAAGTGTTGTAGGTTTGTTTTGG	CCCTACATCCCAATACTATAAAATC	chr7:28,215,959-28,216,455	497	4
JAZF1	TGTTATTGTTTAGATGATTTTTATTT	AATAATAAACCTACAATACTTCATTTCATA	chr7:28,215,248-28,215,701	454	5
JAZF1	CCTAAACCTTTCAACAAATCCTCTA	TATTTATTAAGTAGTTATTGTGTGTAGAGA	chr7:28,218,598-28,218,997	400	12
JAZF1	TAAGTGTTTTTTTTAGAAGTTTTGATATAT	ACATTATACAATATTAATCCCATAC	chr7:28210216-28210569	354	7
DAPK1	TTTTTAGTTTTTAGGTAAATAAAGAATAGT	AACCCCCATCTATATTTTCAATC	chr9:90114719-90115198	480	2
DAPK1	AAGAGGTTAAAATTTTTATAGTTGAAAATT	AAAAATCCCATATCCACTAAAAACC	chr9:90111191-90111491	300	4
DAPK1	TAGAAAAAGAGGTTTTTTTGTGGTT	TCCTACATATCCATTTTACATTAAAACTTA	chr9:90115575-90115987	413	4
TGFBR1	TATATAGATTAATTTTTTTAAAAGGGAAAG	AATACACTAAATACATTACATAAATTACAT	cnr19:101912593-101913000	408	4
