# Supplementary material for: Epigenetic Alterations Affecting Transcription Factors and Signaling Pathways in Stromal Cells of Endometriosis
Source: PLoS One. 2017 Jan 26;12(1):e0170859. doi: 10.1371/journal.pone.0170859 (PMC5268815; doi:10.1371/journal.pone.0170859)
Supplement: S8 Table — (XLSX) [file pone.0170859.s016.xlsx]

## Sheet: S8Table
Gene	qPCR primer F (5'-3')	qPCR primer R (5'-3')	Product Size (BP)
OSR2	GTGTGACATCTGCCACAAGG	ATGTGGGACATTTGTGTGGA	179
ROR1	CAGAAGCTGCGAACTGTATCC	TTTTCATCCAAGGTGAAGCAC	258
DAPK1	CGAGAATCGATGTCCAGGAT	TATTGGGATTTGAGCCGAAG	210
JAZF1	CCAACCTATGTTGCCCTGAG	AATGAAGAGGAGGGGGTGAT	209
HAND2	ACATCGCCTACCTCATGGAC	TTGCTGCTCACTGTGCTTTT	148
TGFBR1	GCAAAGGTCGATTTGGAGAA	TGACACCAACCAGAGCTGAG	206
SLC22A23	ACTGGATGCATTGCTGACTG	GGGGCACAGCTCTATTCGTA	192
CSNK1D	AGGAGAAGAGGTTGCCATCAAG	TCCATCACCATGACGTTGTAGTC	173
B2MGL	GATGAGTATGCCTGCCGTGT	CAATCCAAATGCGGCATCT	155
BDNF	CAAGCTCCGTAGTGCAGGAA	GTGGCTCCACACATCCAGTT	103
BDNFas	TGGCTCCCTACAAACATGTCA	TGTACACGTCCAGGGTGATG	123
JAZF1as	ACTCTGCACCATGCTCTGTG	GGTTGCCTCTGCTCCTGTAG	222
HAND2as	AAGCACCTAGCCCTTTGGAT	GGCTTACGACCTGAGTCGAG	176
